# Supplementary material for: m6A modification suppresses ocular melanoma through modulating HINT2 mRNA translation
Source: PubMed Central journal article supplement (PMC6854757; doi:10.1186/s12943-019-1088-x), 2019-11-14
Supplement: 12943_2019_1088_MOESM2_ESM.pdf [file 12943_2019_1088_MOESM2_ESM.pdf]

1 Additional file 2: **Table S2.** The clinical characteristics of ocular melanoma patient  
2 cohorts in tissue chip assay.

---

| Features                     | Ocular melanoma | Normal mylanocyte |
|------------------------------|-----------------|-------------------|
| Numbers                      | 88              | 28                |
| Sex, F/M                     | 23/65           | 18/10             |
| Age                          | 54.91±18.16     | 39.75±19.91       |
| Stage(AJCC 7 <sup>th</sup> ) |                 |                   |
| T1                           | 4               | /                 |
| T2                           | 38              | /                 |
| T3                           | 43              | /                 |
| T4                           | 3               | /                 |

---

3  
4  
5
