# Supplementary material for: m6A modification suppresses ocular melanoma through modulating HINT2 mRNA translation
Source: PubMed Central journal article supplement (PMC6854757; doi:10.1186/s12943-019-1088-x), 2019-11-14

# Additional file 11: Figure S7.

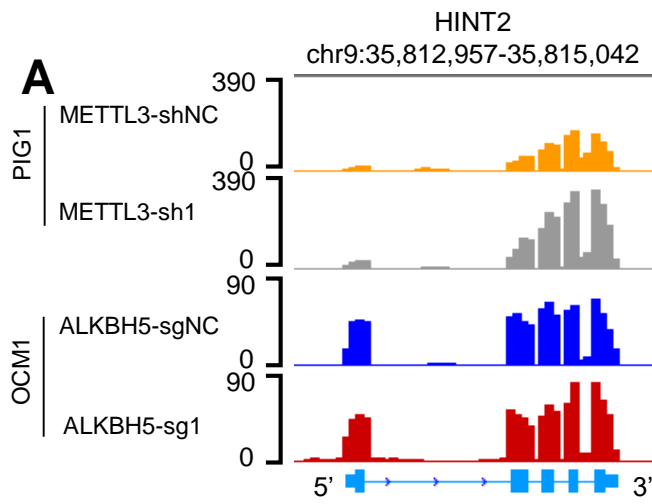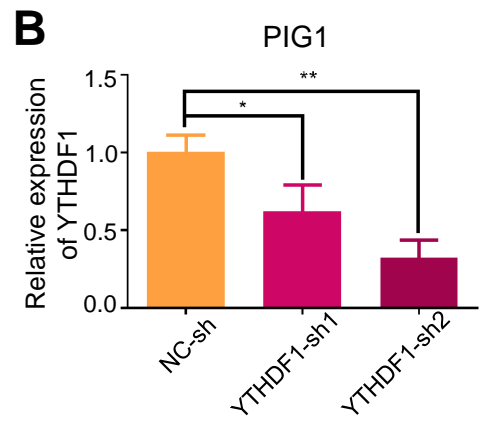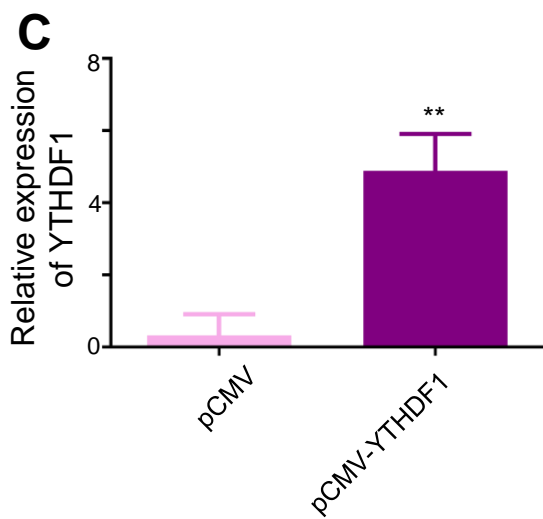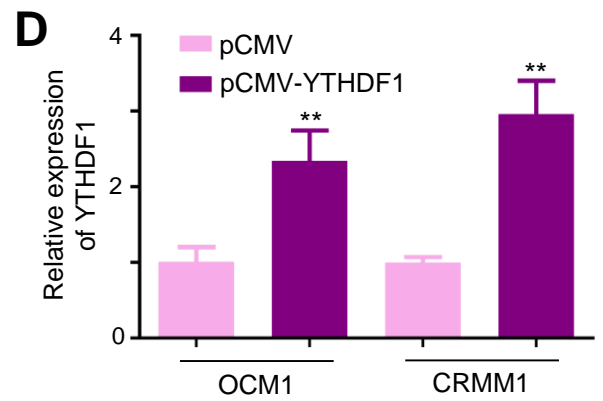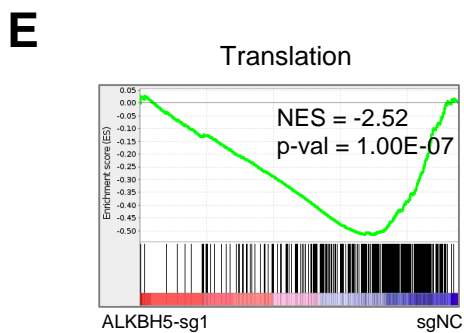

Supplement: 12943_2019_1088_MOESM11_ESM.pdf [file 12943_2019_1088_MOESM11_ESM.pdf]
