# Supplementary material for: m6A modification suppresses ocular melanoma through modulating HINT2 mRNA translation
Source: PubMed Central journal article supplement (PMC6854757; doi:10.1186/s12943-019-1088-x), 2019-11-14
Supplement: 12943_2019_1088_MOESM12_ESM.pdf [file 12943_2019_1088_MOESM12_ESM.pdf]

1 Additional file 12: **Table S5.** Oligonucleotides used in this study

2 **Oligonucleotides used for cloning sgRNA expression vector**

| Oligonucleotides name          | Sequence (5'-3')           |
|--------------------------------|----------------------------|
| <i>ALKBH5</i> -sgRNA-1-forward | CACCGGGGATCTCGTCCACGTCGCC  |
| <i>ALKBH5</i> -sgRNA-1-reverse | AAACGGCGACGTGGACGAGATCCCC  |
| <i>ALKBH5</i> -sgRNA-2-forward | CACCGGACGTCCCGGGACAACCTATA |
| <i>ALKBH5</i> -sgRNA-2-reverse | AAACTATAGTTGTCCCGGGACGTCC  |

3  
4 **Oligonucleotides used for cloning shRNA expression vector**

| Oligonucleotides name          | Sequence (5'-3')       |
|--------------------------------|------------------------|
| <i>METTL3</i> -shRNA-1-forward | GCAAGTATGTTCACCTATGAAA |
| <i>METTL3</i> -shRNA-1-reverse | TTTCATAGTGAACATACTTGC  |
| <i>METTL3</i> -shRNA-2-forward | GCTGCACTTCAGACGAATTAT  |
| <i>METTL3</i> -shRNA-2-reverse | ATAATTCGTCTGAAGTGCAGC  |
| <i>YTHDF1</i> -shRNA-1-forward | GTTTCGTTACATCAGAAGGATA |
| <i>YTHDF1</i> -shRNA-1-reverse | TATCCTTCTGATGTAACGAAC  |
| <i>YTHDF1</i> -shRNA-2-forward | CCCGAAAGAGTTTGAGTGGAA  |
| <i>YTHDF1</i> -shRNA-2-reverse | TTCCACTCAAACCTTTTCGGG  |

5  
6 **Oligonucleotides used for siRNA**

| Oligonucleotides name | Sequence (5'-3')        |
|-----------------------|-------------------------|
| <i>HINT2</i> -siRNA-1 | TGCACAATCTGTGTATCATCTGC |
| <i>HINT2</i> -siRNA-2 | GTGTATCATCTGCACATTCATGT |

7  
8 **ssRNA probes used for RNA pull-down**

| Oligonucleotides name  | Sequence (5'-3')                                                                       |
|------------------------|----------------------------------------------------------------------------------------|
| A probe                | TGAACCTGCCAACTGATTAAAGGACACCAG <sup>A</sup> CT<br>CTGGATGCTTGGATGGA-Biotin             |
| m <sup>6</sup> A probe | TGAACCTGCCAACTGATTAAAGGACACCAG <sup>m<sup>6</sup>A</sup><br>CTCTGGATGCTTGGATGGA-Biotin |
| UTR-NC probe           | AAGGGAAAAATGGACCCTGTGATGCTAATAAAA<br>CTGTTCTCCCTTAA-Biotin                             |

9  
10 **Oligonucleotides used for luciferase reporter gene**

| Oligonucleotides name  | Sequence (5'-3')                                                                                          |
|------------------------|-----------------------------------------------------------------------------------------------------------|
| <i>HINT2</i> -3'UTR-WT | ACCTGCCAACTGATTAAAGGACACC<br>AGACTCTGGATGCTTGGATGGAAAG<br>GGAAAAATGGACCCTGTGATGCTAA<br>TAAACTGTTCTCCCTTAA |
| <i>HINT2</i> -3'UTR-MT | ACCTGCCAACTGATTAAAGGACACC<br>AGTCTCTGGATGCTTGGATGGAAAG<br>GGAAAAATGGACCCTGTGATGCTAA<br>TAAACTGTTCTCCCTTAA |
