# Supplementary material for: m6A modification suppresses ocular melanoma through modulating HINT2 mRNA translation
Source: PubMed Central journal article supplement (PMC6854757; doi:10.1186/s12943-019-1088-x), 2019-11-14
Supplement: 12943_2019_1088_MOESM14_ESM.pdf [file 12943_2019_1088_MOESM14_ESM.pdf]

1 Additional file 14: **Table S7.** Primers used in this study

2 **qRT-PCR Primers**

| <b>Primer name</b>        | <b>Sequence (5'-3')</b> |
|---------------------------|-------------------------|
| <i>HINT2</i> -RIP-forward | GAAGCTGGGTGCACAATCTG    |
| <i>HINT2</i> -RIP-reverse | CCCTTCCATCCAAGCATCCA    |

3

4 **m<sup>6</sup>A-RIP-qPCR Primers**

| <b>Primer name</b>     | <b>Sequence (5'-3')</b> |
|------------------------|-------------------------|
| <i>METTL3</i> -forward | TTGTCTCCAACCTTCCGTAGT   |
| <i>METTL3</i> -reverse | CCAGATCAGAGAGGTGGTGTAG  |
| <i>ALKBH5</i> -forward | TCAAGCCTATTTCGGGTGTCG   |
| <i>ALKBH5</i> -reverse | TTGGGTTTCAGAGCAGGGTC    |
| <i>HINT2</i> -forward  | CTTGTGTTCCGTGATGTGGC    |
| <i>HINT2</i> -reverse  | ACAGATTGTGCACCCAGCTT    |
| <i>YTHDF1</i> -forward | CGTGGACACCCAGAGAACAA    |
| <i>YTHDF1</i> -reverse | TGCCCAAAAACAGCATCGTG    |

5

6

7
