# Supplementary material for: m6A modification suppresses ocular melanoma through modulating HINT2 mRNA translation
Source: Springer Nature journal article supplement (doi:10.1186/s12943-019-1088-x), 2019-11-14
Supplement: MOESM1 [file 17388640]

1 Additional file 1: **Table S1.** The clinical characteristics of ocular melanoma patient  
2 cohorts in the m<sup>6</sup>A assay.

| Features                     | Ocular melanoma | Normal uveal |
|------------------------------|-----------------|--------------|
| Numbers                      | 10              | 4            |
| Sex, F/M                     | 6/4             | 1/3          |
| Age                          | 47.2±19.52      | 17.1±7.66    |
| Stage(AJCC 7 <sup>th</sup> ) |                 |              |
| T1                           | 0               | /            |
| T2                           | 0               | /            |
| T3                           | 5               | /            |
| T4                           | 5               | /            |

3  
4  
5  
6  
7  
8  
9  
10  
11  
12  
13  
14  
15  
16  
17  
18  
19  
20  
21  
22  
23  
24  
25  
26  
27  
28  
29  
30  
31  
32  
33
