# Supplementary material for: m6A modification suppresses ocular melanoma through modulating HINT2 mRNA translation
Source: Springer Nature journal article supplement (doi:10.1186/s12943-019-1088-x), 2019-11-14

Additional file 7: **Figure S4.**

**A**

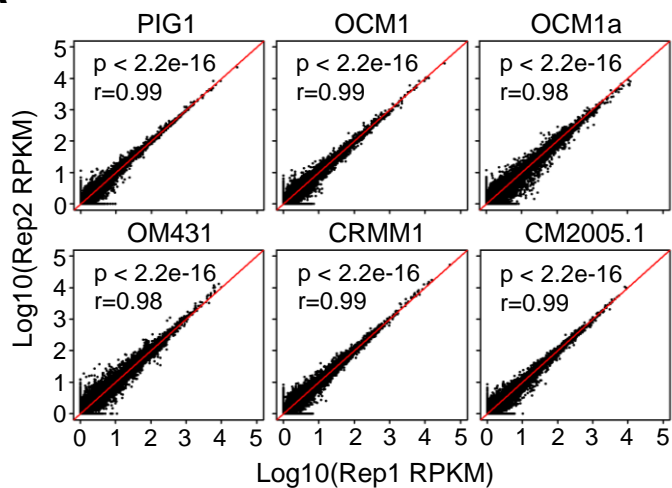

**B**

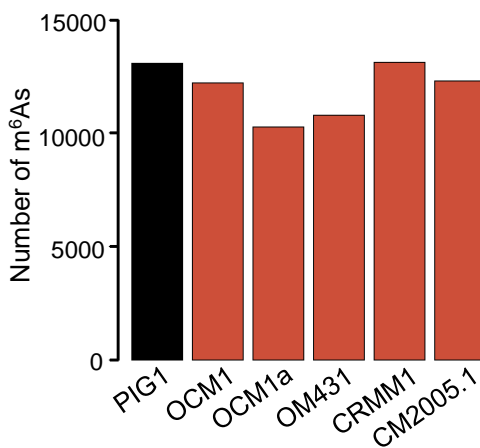

**C**

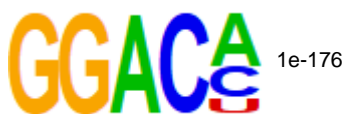

**E**

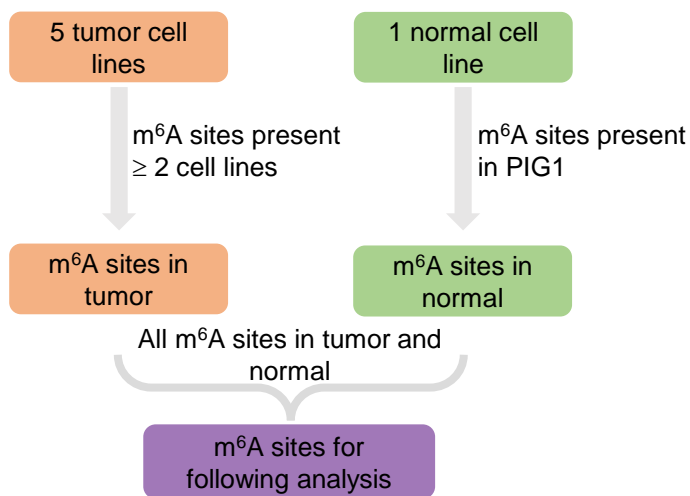

**D**

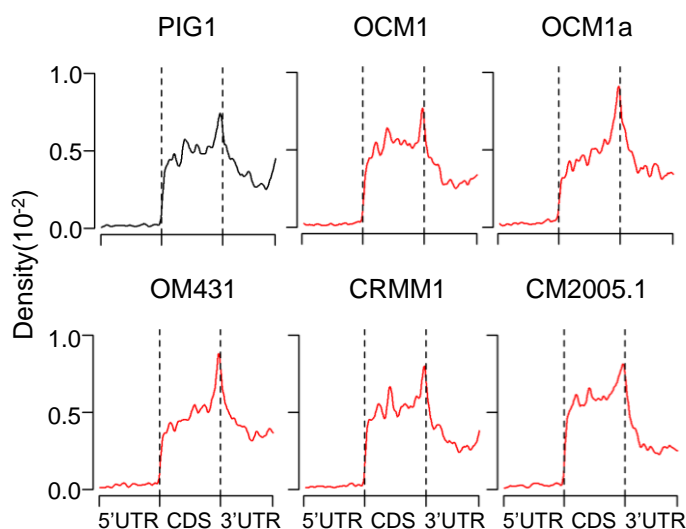

**F**

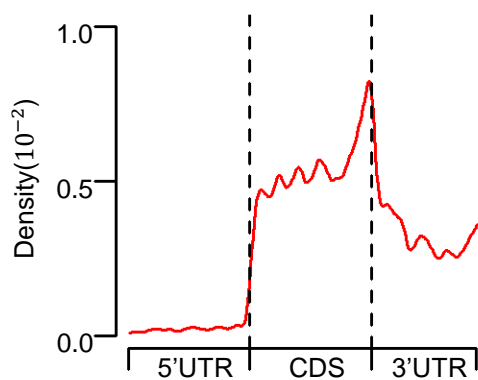

**G**

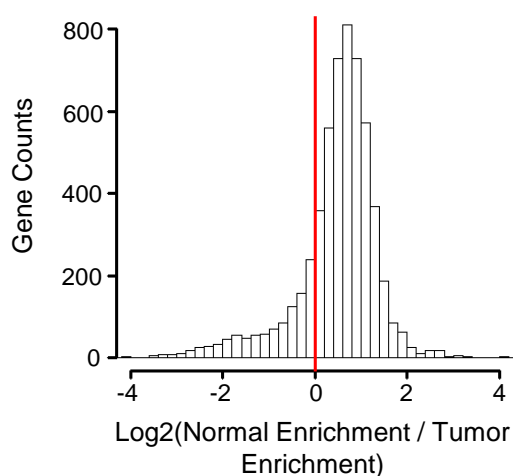

Supplement: MOESM7 [file 17388640]
