# Supplementary material for: m6A modification suppresses ocular melanoma through modulating HINT2 mRNA translation
Source: Springer Nature journal article supplement (doi:10.1186/s12943-019-1088-x), 2019-11-14

# Additional file 8: Figure S5.

**A**

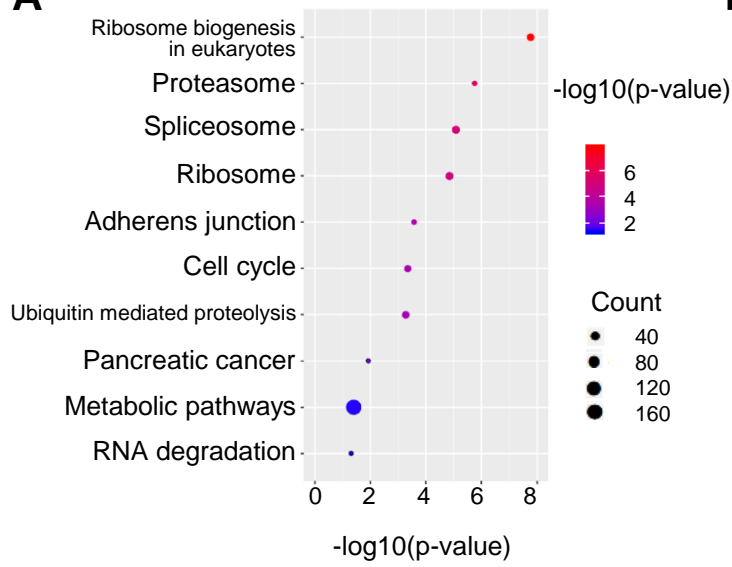

**B**

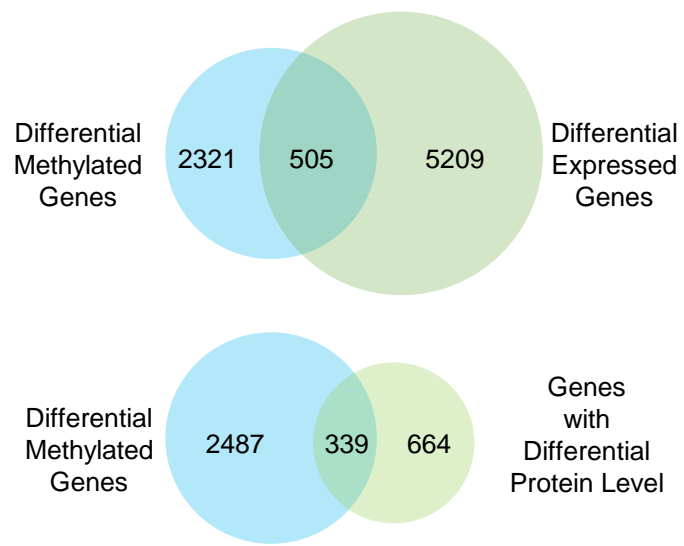

**C**

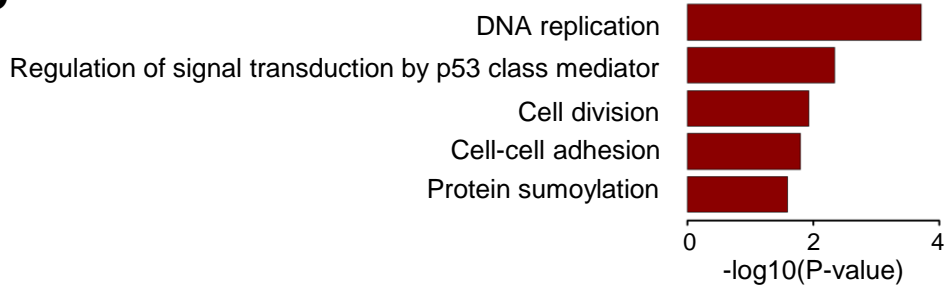

Supplement: MOESM8 [file 17388640]
