# Supplementary material for: m6A modification suppresses ocular melanoma through modulating HINT2 mRNA translation
Source: Springer Nature journal article supplement (doi:10.1186/s12943-019-1088-x), 2019-11-14

Additional file 10: **Figure S6.**

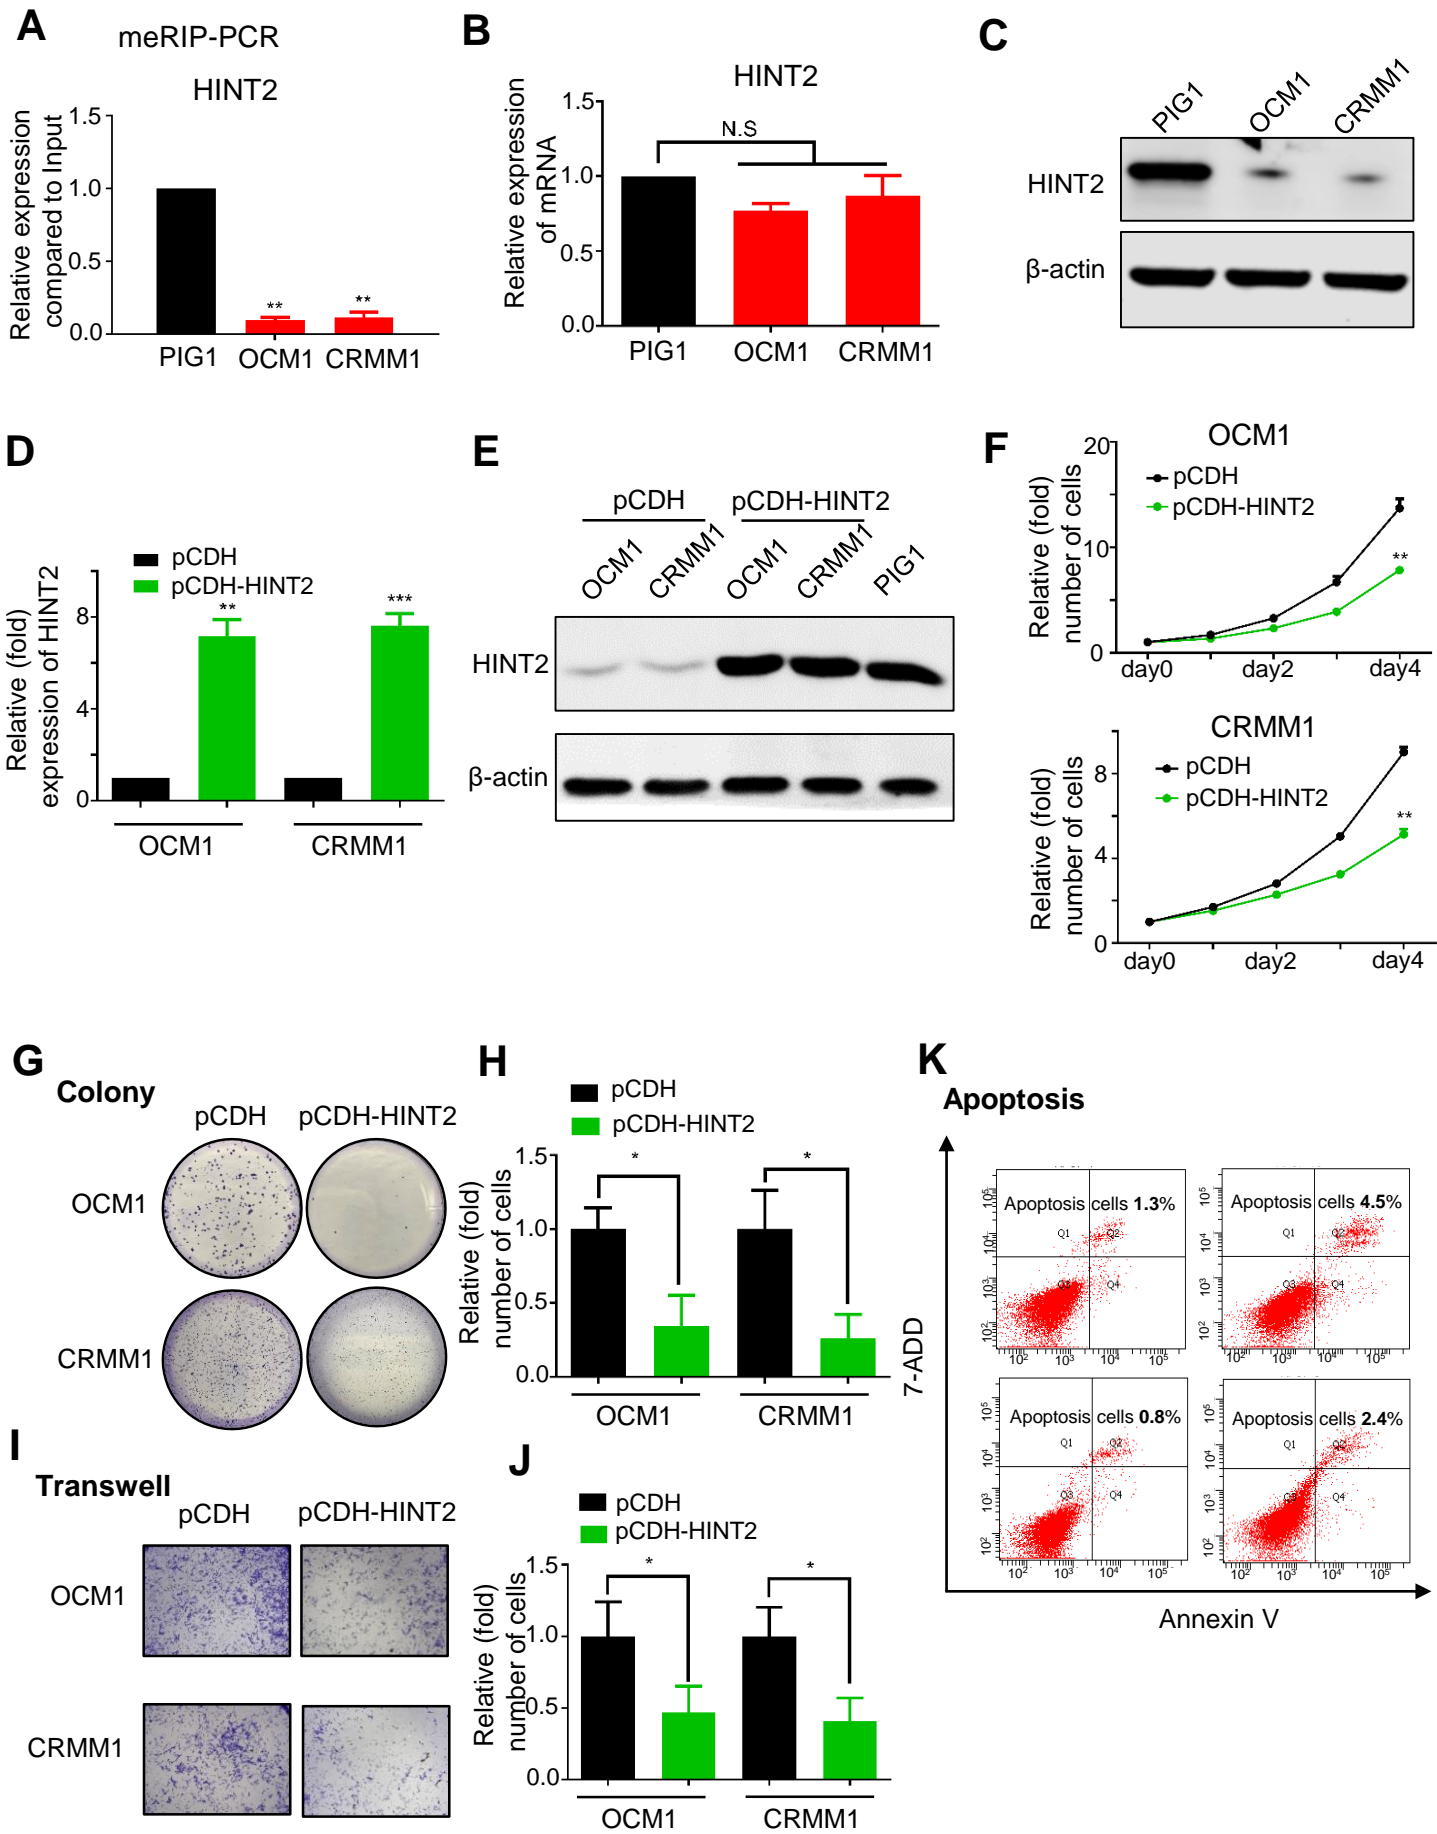

Supplement: MOESM10 [file 17388640]
