# Supplementary material for: m6A modification suppresses ocular melanoma through modulating HINT2 mRNA translation
Source: Springer Nature journal article supplement (doi:10.1186/s12943-019-1088-x), 2019-11-14
Supplement: MOESM13 [file 17388640]

1 Additional file 13: **Table S6.** Antibodies used in this study

| <b>Antibodies</b>                           | <b>Catalogue name</b> | <b>Company</b> |
|---------------------------------------------|-----------------------|----------------|
| Rabbit-anti-N <sup>6</sup> -methyladenosine | ABE572                | Merck          |
| Rabbit anti-METTTL3                         | ab195352              | Abcam          |
| Rabbit anti-ALKBH5                          | ab195377              | Abcam          |
| Rabbit anti-HINT2                           | ab220935, ab128677    | Abcam          |
| Rabbit anti-YTHDF1                          | 17479-1-AP            | Proteintech    |
| Rabbit anti-YTHDF2                          | 24744-1-AP            | Proteintech    |
| Rabbit anti-YTHDF3                          | 25537-1-AP            | Proteintech    |
| Mouse anti-GAPDH                            | 97166                 | CST            |
| Mouse anti- $\beta$ -actin                  | 3700                  | CST            |
| Rabbit IgG                                  |                       | Merck          |
| Anti-Rabbit-IgG-DyLight800                  | 5151                  | CST            |
| Anti-Rabbit-IgG-Alexa Fluor®<br>555         | 4417                  | CST            |
| Anti-Mouse-IgG-DyLight800                   | 5257                  | CST            |

2

3
