# Supplementary material for: m6A modification suppresses ocular melanoma through modulating HINT2 mRNA translation
Source: Springer Nature journal article supplement (doi:10.1186/s12943-019-1088-x), 2019-11-14

Fig1I

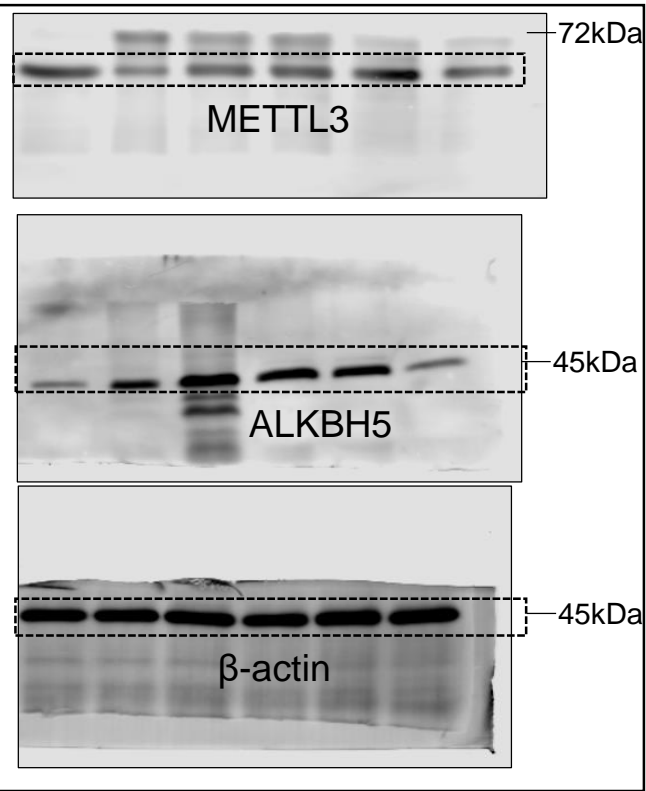

Fig6E

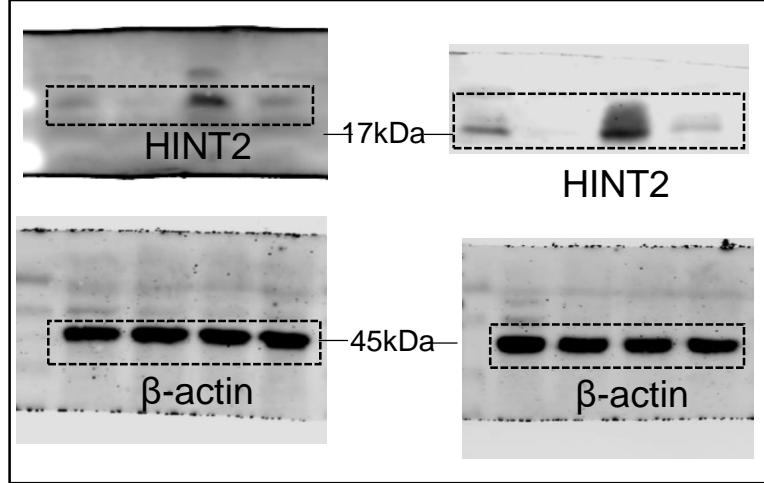

Fig7C

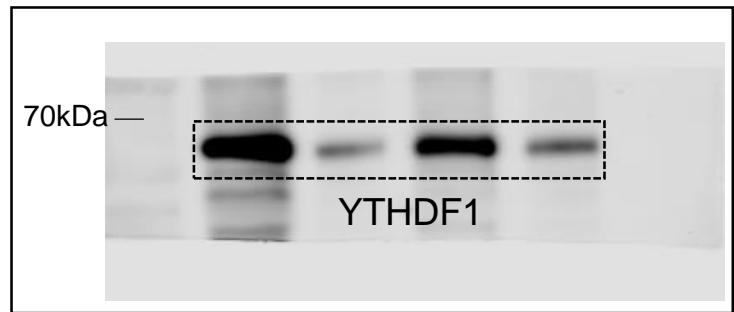

Fig6C

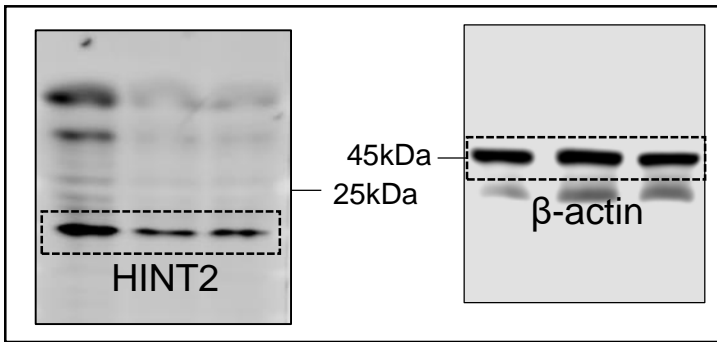

Fig7C

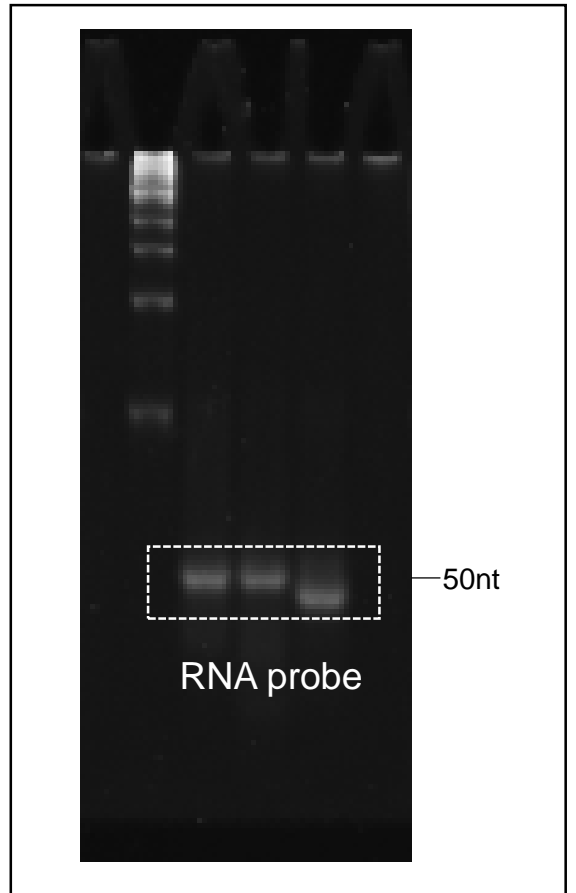

Fig6D

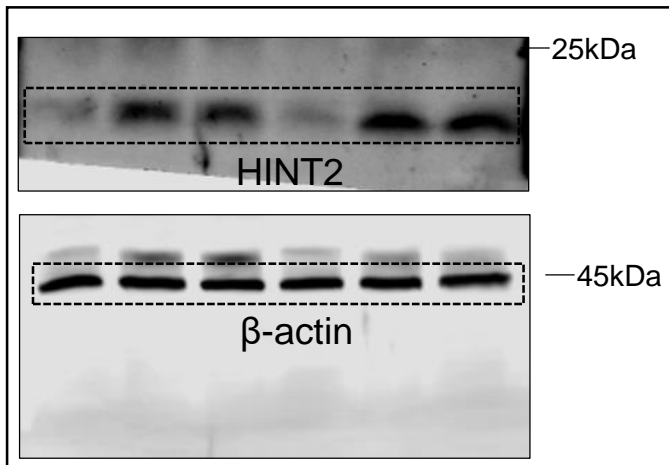

Fig7D

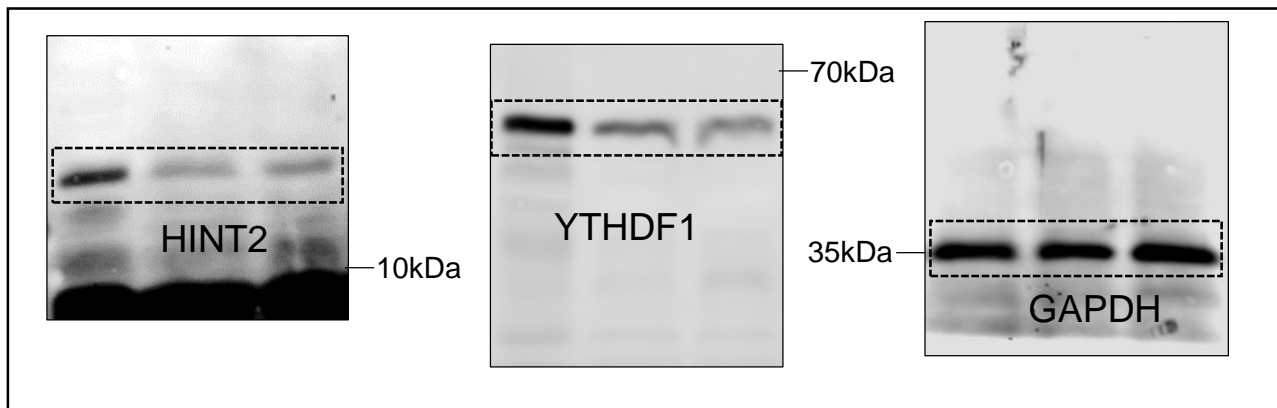

Fig7E

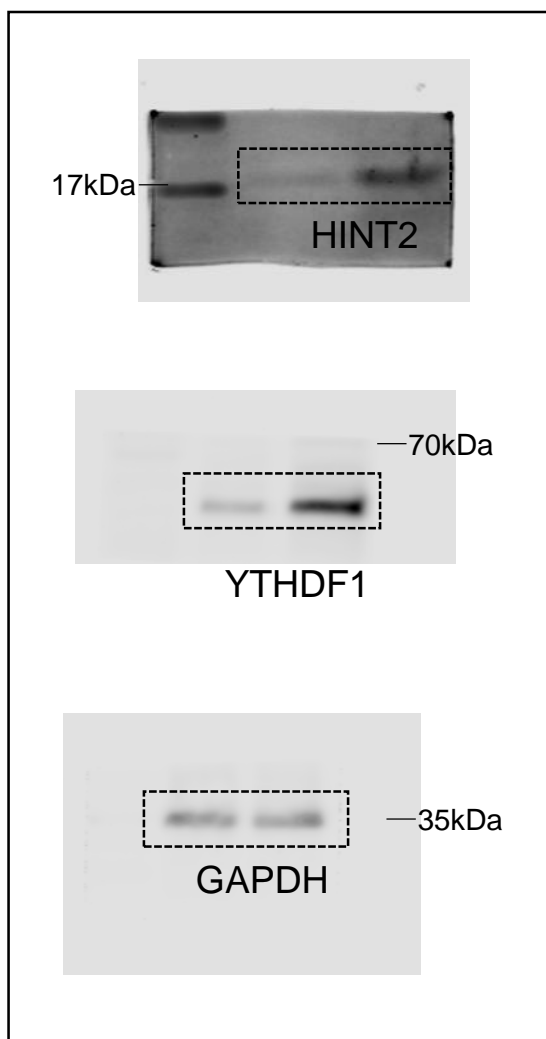

Fig7F

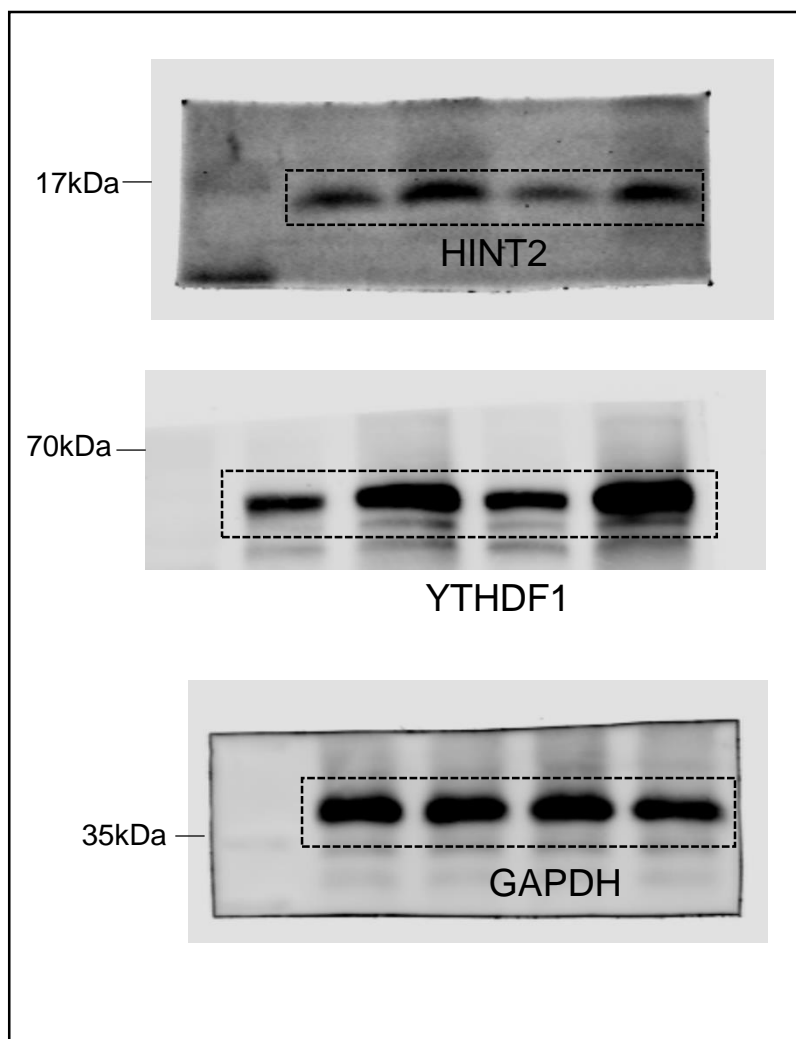

Fig S1B

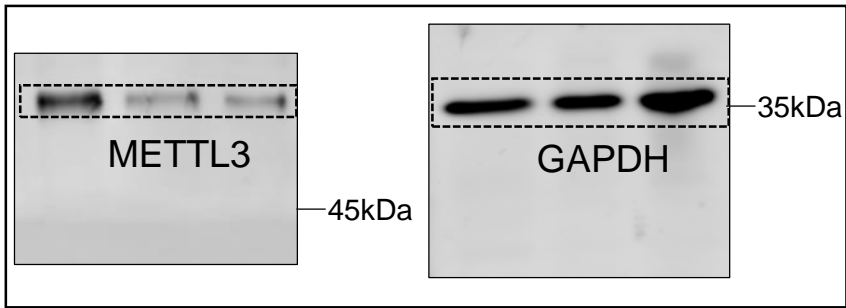

Fig S2B

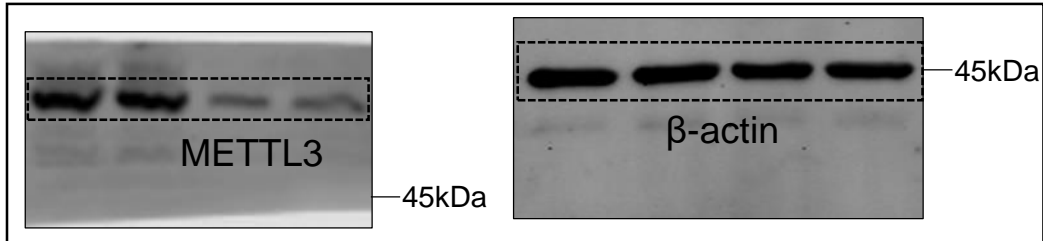

Fig S3A

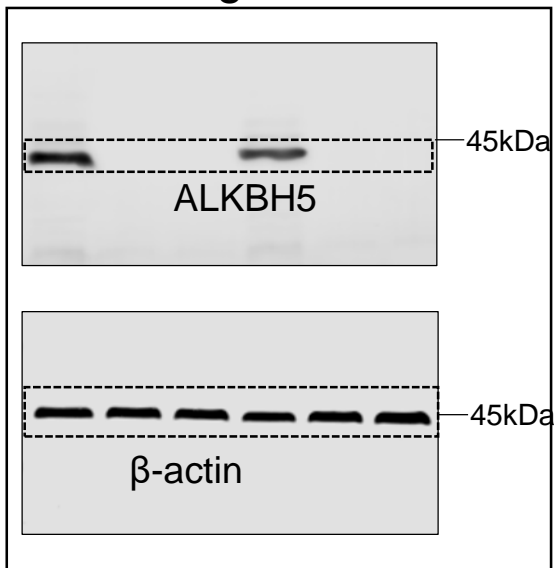

Fig S6C

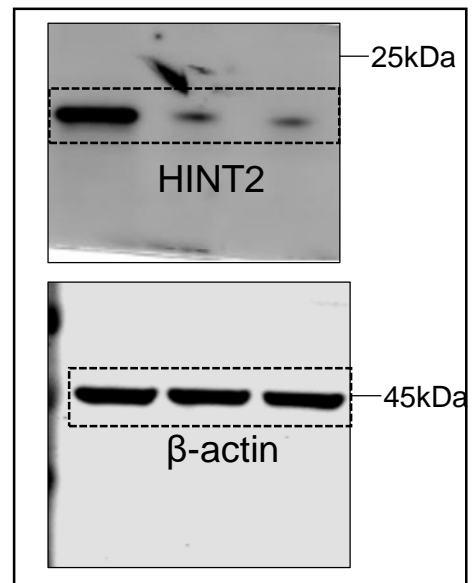

Fig S6E

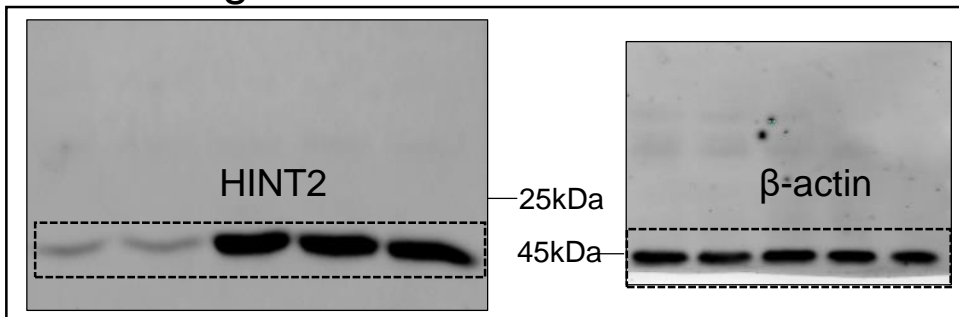

Supplement: MOESM15 [file 17388640]
