# Supplementary material for: m6A modification suppresses ocular melanoma through modulating HINT2 mRNA translation
Source: Mol Cancer. 2019 Nov 14;18:161. doi: 10.1186/s12943-019-1088-x (PMC6854757; doi:10.1186/s12943-019-1088-x)
Supplement: Supplementary file 9 — Additional file 9: Table S4. List of protein expression of genes in ocular melanoma cells and normal cells according to the Label-free MS. [file 12943_2019_1088_MOESM9_ESM.csv]

Majority.protein.IDs	Gene.names	Number.of.proteins	Unique.peptides	Sequence.coverage....	MS.MS.count	Q.value	Score	LFQ.intensity.CM1	LFQ.intensity.CM5	LFQ.intensity.OCM1	LFQ.intensity.OCM1A	LFQ.intensity.OCM431	LFQ.intensity.PIG1	iBAQ	Symbol	Rank	CM1	cm2005	ocm1	ocm1a	om431	PIG1.1	im..T.4	im..T.5	im..T.2	im..T.1	im..T.3	im..PIG1.1	T	PIG1	fc..T--PIG1	ENTREZID	Alias
A0A075X8B5;H9E785;A0A059QSR8;A0A141ZSL4;A0A141ZQA8;Q1ZY32;X5CDJ3;X5BLB3;V9N9T2;V9N9H0;V9N518;V9JFH6;V9J5G3;V9J548;V9J0Z6;V9IZQ9;V5JGF7;U5ZDA5;U5YXJ5;U5YT86;U3LDR4;U3LCU1;U3L9L1;U3L8Y8;U3L8P3;U3L6U8;U3L6N6;U3L6H7;T2HMQ7;T1Q5B1;T1Q517;S5RPJ8;S5RLC1;S4UQT8;R9Y4Q4;R9Y4D9;R9Y457;R9Y323;R9Y0J8;Q9T9Y1;Q9B2Y7;Q9B2Y5;Q9B2X8;Q9B2X6;Q9B2W5;Q9B2W2;Q9B1S7;Q9B188;Q9B0T8;Q8WCZ0;Q8W8T1;Q8HNR0;Q8HG25;Q8HCA7;Q8HB6…	ND4;ndh4;NADH4;MT-ND4	445	4	16.5	16	0	13.217	10328000	9117300	12247000	11511000	5186000	9700200	21151000	ND4	1552	10328000	9117300	12247000	11511000	5186000	9700200	FALSE	FALSE	FALSE	FALSE	FALSE	FALSE	9677860	9700200	0.997696955	4538	ND4;NADH4;MT-ND4
A0A075X871;A0A059QTG6;H9E795;A0A075X6R4;H9E7H3;H9E7J9;Q5Y0G2;Q5Y0J7;Q5Y0H4;Q5Y0F3;Q5Y0E5;Q5Y078;Q5Y070;Q5Y065;Q5Y011;Q5XZY3;Q5XZX9;Q5XZT6;Q5XZR9;Q5XZP7;Q5XZL8;Q5XZK9;Q5XZI9;Q5XZI8;Q5XZI3;Q5XZI2;Q5XZH6;B4YCG0;T1Q6R9;T1Q5Q2;T1Q5P3;T1Q5B9;S4T6M3;Q9B2X0;Q9B2W9;Q9B2U6;Q9B1S6;Q9B1S4;Q8WCY1;Q8HNQ7;Q85L10;Q85L04;Q85KZ1;Q85KW2;Q85KW0;Q7YEF1;Q7YCF3;Q7YCE5;Q7YCE0;Q7YCC7;Q7Y664;Q6WQG6;Q6WQA1;Q6RRW7;Q6RPE6;Q6…	COX3;COIII;CO3;coxIII;MT-CO3	517	1	9.8	6	0.00026233	3.75	9809900	12601000	13717000	11414000	0	16263000	192770000	COX3	316	9809900	12601000	13717000	11414000	4133013.415	16263000	FALSE	FALSE	FALSE	FALSE	TRUE	FALSE	10334982.68	16263000	0.635490542	4514	COX3;COIII;CO3
A0A023T787;Q9Y5S9;Q9Y5S9-2;A0A0J9YW13	RBM8;RBM8A	5	8	47.1	33	0	44.242	42803000	63106000	42383000	41032000	49016000	50907000	110680000	RBM8	523	42803000	63106000	42383000	41032000	49016000	50907000	FALSE	FALSE	FALSE	FALSE	FALSE	FALSE	47668000	50907000	0.936374173	9939	RBM8A;RBM8
A0A0C4DFM1;A0A024QYR3;Q92544;B4DYH6;B4DH88;B4DKC1	TM9SF4	7	4	9.1	14	0	11.804	11641000	10811000	8912500	8195400	8478300	12300000	8285700	TM9SF4	2268	11641000	10811000	8912500	8195400	8478300	12300000	FALSE	FALSE	FALSE	FALSE	FALSE	FALSE	9607640	12300000	0.781108943	9777	TM9SF4
B3KSG9;A0A024QYR8;Q99805	TM9SF2	3	7	14.7	25	0	22.74	19146000	28845000	13830000	19373000	15327000	13722000	22624000	TM9SF2	1505	19146000	28845000	13830000	19373000	15327000	13722000	FALSE	FALSE	FALSE	FALSE	FALSE	FALSE	19304200	13722000	1.406806588	9375	TM9SF2
Q96JZ5;A0A024QYS2;Q9HD45;Q5TB53;Q8NCC4;Q8WUB5	SMBP;TM9SF3	8	3	5.9	9	0	7.3419	0	17580000	11744000	7898500	8678100	7523200	10946000	SMBP	2042	3562290.46	17580000	11744000	7898500	8678100	7523200	TRUE	FALSE	FALSE	FALSE	FALSE	FALSE	9892578.092	7523200	1.314942856	56889	TM9SF3;SMBP
A0A024QYT6;H7C1E4;P61966;P61966-2	AP1S1	4	2	19.6	8	0	12.275	1635600	0	3046900	2873700	2634400	2316900	3145200	AP1S1	3062	1635600	3527457.651	3046900	2873700	2634400	2316900	FALSE	TRUE	FALSE	FALSE	FALSE	FALSE	2743611.53	2316900	1.184173478	1174	AP1S1
B4DVQ5;A1KYQ7;A0A024QYU9;Q99613;B4DVU3;B4DDN4;Q99613-2;B5ME19;B4DRU0;B4E2Z6;B3KNZ4;A0A024QYX7	EIF3C;EIF3CL	16	25	33.2	134	0	131.29	169150000	161160000	198030000	206680000	219300000	142190000	76077000	EIF3C	716	169150000	161160000	198030000	206680000	219300000	142190000	FALSE	FALSE	FALSE	FALSE	FALSE	FALSE	190864000	142190000	1.342316619	8663	EIF3C;EIF3S8;EIF3CL
A0A024QYX0;Q15125;C9J719;C9JJ78	EBP	4	3	16.5	8	0	13.58	30845000	19223000	9845700	0	0	11734000	97515000	EBP	577	30845000	19223000	9845700	4146479.446	2094109.437	11734000	FALSE	FALSE	FALSE	TRUE	TRUE	FALSE	13230857.78	11734000	1.127565858	10682	EBP
A0A024QYX3;P98179	RBM3	2	4	31.8	23	0	12.43	41006000	39576000	39601000	31848000	48777000	41660000	104120000	RBM3	551	41006000	39576000	39601000	31848000	48777000	41660000	FALSE	FALSE	FALSE	FALSE	FALSE	FALSE	40161600	41660000	0.964032645	5935	RBM3
B2R7R5;A0A024QYY3;O60256;O60256-4;O60256-3;O60256-2;E7EPA1;C9JJS3;C9K0K7;I3L0S1;C9JDU5	PRPSAP2	17	6	28.7	12	0	33.262	0	0	4512000	4282300	0	6024000	2596100	PRPSAP2	3186	1797855.553	1769744.806	4512000	4282300	4252912.616	6024000	TRUE	TRUE	FALSE	FALSE	TRUE	FALSE	3322962.595	6024000	0.551620617	5636	PRPSAP2
B3KN29;A0A024QZ22;O60831;A6NM71	PRAF2	6	3	20.2	5	0	5.9078	0	0	7405000	6924100	0	26721000	32694000	PRAF2	1255	3666239.03	3631295.876	7405000	6924100	4149800.848	26721000	TRUE	TRUE	FALSE	FALSE	TRUE	FALSE	5155287.151	26721000	0.192930173	11230	PRAF2
A0A024QZ30;P31040;P31040-2;D6RFM5;B3KT34;A0A087X1I3;Q0QF12;P31040-3;B4DYN5	SDHA	16	23	48.2	125	0	292.26	191050000	198960000	204220000	1.54E+08	146390000	176500000	97304000	SDHA	578	191050000	198960000	204220000	1.54E+08	146390000	176500000	FALSE	FALSE	FALSE	FALSE	FALSE	FALSE	178924000	176500000	1.013733711	6389	SDHA
Q6FG43;J3QLD9;A0A024QZ62;E7EMK3;Q14254;Q9BTI6;K7EKW9	FLOT2;hCG_1998851	7	8	24.3	17	0	20.61	5336000	12708000	17835000	15369000	9100900	8521500	9542300	FLOT2	2157	5336000	12708000	17835000	15369000	9100900	8521500	FALSE	FALSE	FALSE	FALSE	FALSE	FALSE	12069780	8521500	1.41639148	2319	FLOT2
A0A0D9SFK2;A0A024QZ63;Q92614-2;Q92614-4;Q92614;Q5QD01;B4DYM1;Q92614-5;Q92614-3;B4DZ32;B4E0T8	MYO18A;hCG_27198	12	8	5.6	9	0	20.347	0	10125000	9400000	8027300	10316000	0	1095900	MYO18A	3734	3576843.561	10125000	9400000	8027300	10316000	3376863.091	TRUE	FALSE	FALSE	FALSE	FALSE	TRUE	8289028.712	3376863.091	2.454653473	399687	MYO18A
A0A024QZ64;B7Z3K9;P09972;B7Z1N6;B7Z1Y2;B7Z3K7;A8MVZ9;B7Z1Z9	ALDOC	15	12	54.7	49	0	323.31	143760000	61231000	65104000	61302000	90735000	61296000	64534000	ALDOC	813	143760000	61231000	65104000	61302000	90735000	61296000	FALSE	FALSE	FALSE	FALSE	FALSE	FALSE	84426400	61296000	1.377355782	230	ALDOC
A0A024QZ68;A8MYQ9;B4DNC0;Q9BZG1-2;Q9BZG1;C9JBG0;Q6NXT3;C9JY26;Q9BZG1-4;Q96PJ7;E7ES60	RAB34	16	5	23.2	18	0	12.062	8540500	7547200	8489500	7875700	8068300	7501000	7998800	RAB34	2291	8540500	7547200	8489500	7875700	8068300	7501000	FALSE	FALSE	FALSE	FALSE	FALSE	FALSE	8104240	7501000	1.080421277	83871	RAB34
A0A024QZ77;Q96C19;H0Y4Y4	EFHD2	3	7	41.2	30	0	44.794	27730000	43847000	40070000	35998000	33380000	32071000	51806000	EFHD2	942	27730000	43847000	40070000	35998000	33380000	32071000	FALSE	FALSE	FALSE	FALSE	FALSE	FALSE	36205000	32071000	1.1289015	79180	EFHD2
Q53FE5;A0A024QZ81;Q9NVZ3;Q9NVZ3-2;B4DUR7;F6SKB8;Q9NVZ3-3;D6RB24;Q9NVZ3-4	NECAP2	11	5	23.2	8	0	15.361	5106400	0	5381000	0	0	9519500	5346900	NECAP2	2655	5106400	3541993.738	5381000	2112234.931	2875095.147	9519500	FALSE	TRUE	FALSE	TRUE	TRUE	FALSE	3803344.763	9519500	0.399531988	55707	NECAP2
A0A024QZA8;P29317;B4DL04;Q96HF4	EPHA2	56	14	20.2	24	0	44.7	6490500	4401900	0	0	0	64834000	5637900	EPHA2	2600	6490500	4401900	4003108.44	4265806.484	1245929.825	64834000	FALSE	FALSE	TRUE	TRUE	TRUE	FALSE	4081448.95	64834000	0.062952293	1969	EPHA2
A0A024QZB7;Q8WWM7;A0A024QZC0;A0A024QZ91;Q8WWM7-6;Q8WWM7-8;Q8WWM7-5;Q8WWM7-4;Q8WWM7-9;Q8WWM7-2;Q8WWM7-3;H3BUF6	ATXN2L	18	14	17.2	57	0	41.227	33236000	36126000	40699000	41116000	48350000	30499000	18995000	ATXN2L	1641	33236000	36126000	40699000	41116000	48350000	30499000	FALSE	FALSE	FALSE	FALSE	FALSE	FALSE	39905400	30499000	1.308416669	11273	ATXN2L
A0A024QZD1;J3QQ67;Q07020;F8VYV2;G3V203;Q0QEW2;H0YHA7;Q07020-2;B4DDY5;A0A075B7A0;F8VUA6	RPL18	12	6	29.8	64	0	120.05	414250000	378460000	444650000	465780000	452100000	397510000	1028200000	RPL18	45	414250000	378460000	444650000	465780000	452100000	397510000	FALSE	FALSE	FALSE	FALSE	FALSE	FALSE	431048000	397510000	1.084370205	6141	RPL18
A0A024QZD5;P08621;A8KAQ5;P08621-2;P08621-3;M0QYR1	SNRP70;SNRNP70	10	16	33	82	0	55	115970000	103290000	91724000	87994000	75750000	116420000	116220000	SNRP70	494	115970000	103290000	91724000	87994000	75750000	116420000	FALSE	FALSE	FALSE	FALSE	FALSE	FALSE	94945600	116420000	0.815543721	6625	SNRNP70;SNRP70
A0A024QZF1;P37198;M0QXN5	hCG_19665;NUP62	3	7	19.3	23	0	54.24	12310000	16989000	14322000	14951000	10551000	22160000	26178000	hCG_19665	1418	12310000	16989000	14322000	14951000	10551000	22160000	FALSE	FALSE	FALSE	FALSE	FALSE	FALSE	13824600	22160000	0.623853791	23636	NUP62
A0A024QZF2;P10301	RRAS	2	6	39.9	11	0	95.579	0	0	0	5881700	4933400	48341000	11641000	RRAS	1990	2472882.519	2440959.382	2033206.396	5881700	4933400	48341000	TRUE	TRUE	TRUE	FALSE	FALSE	FALSE	3552429.659	48341000	0.073486888	6237	RRAS
H3BP71;A8K6K1;A0A0S2Z537;A0A024QZG0;O75150-4;O75150;A0A0S2Z4Z2;B4DMM1;O75150-3;B4DFU2	RNF40	16	6	8	5	0	11.566	8008500	3847000	4454000	0	5235500	3703800	1776200	RNF40	3453	8008500	3847000	4454000	4163188.396	5235500	3703800	FALSE	FALSE	FALSE	TRUE	FALSE	FALSE	5141637.679	3703800	1.38820608	9810	RNF40
B4DG62;A8K7J7;A0A024QZK7;Q59FD4;P19367-4;P19367-2;P19367;P19367-3;B3KXY9;B3KRA9	HK1	13	34	47.1	141	0	270.2	147550000	161180000	322730000	233840000	195960000	259360000	70172000	HK1	760	147550000	161180000	322730000	233840000	195960000	259360000	FALSE	FALSE	FALSE	FALSE	FALSE	FALSE	212252000	259360000	0.818368291	3098	HK1
Q53F48;A0A024QZK8;P31942-2;P31942;B4DHY1;P31942-3;A0A024QZP1;P31942-4	HNRPH3;HNRNPH3	10	8	36.1	48	0	129.92	60821000	80164000	99961000	109600000	80235000	118450000	96652000	HNRPH3	582	60821000	80164000	99961000	109600000	80235000	118450000	FALSE	FALSE	FALSE	FALSE	FALSE	FALSE	86156200	118450000	0.727363444	3189	HNRPH3;HNRNPH3
B4DSN3;A0A024QZM6;P53992;G5EA31	SEC24C	7	14	21	55	0	59.675	35349000	27100000	36076000	46646000	33967000	29826000	12235000	SEC24C	1958	35349000	27100000	36076000	46646000	33967000	29826000	FALSE	FALSE	FALSE	FALSE	FALSE	FALSE	35827600	29826000	1.201220412	9632	SEC24C
A0A024QZN2;Q8WXX5	hCG_2024613;DNAJC9	3	10	43.8	30	0	28.648	30802000	16058000	20659000	27350000	22901000	34827000	40355000	hCG_2024613	1121	30802000	16058000	20659000	27350000	22901000	34827000	FALSE	FALSE	FALSE	FALSE	FALSE	FALSE	23554000	34827000	0.676314354	23234	DNAJC9
A0A024QZN4;V9HWK2;P18206-2;P18206;B3KXA2;B4E3Q9;Q5JQ13	VCL;HEL114	11	62	63.7	306	0	323.31	501660000	408150000	424300000	417640000	356710000	1375800000	139170000	VCL	433	501660000	408150000	424300000	417640000	356710000	1375800000	FALSE	FALSE	FALSE	FALSE	FALSE	FALSE	421692000	1375800000	0.30650676	7414	VCL;HEL114
A0A024QZN7;Q9NZ45	C10orf70;CISD1	2	3	34.3	16	0	11.505	11738000	17910000	20543000	14606000	11052000	8743200	31908000	C10orf70	1272	11738000	17910000	20543000	14606000	11052000	8743200	FALSE	FALSE	FALSE	FALSE	FALSE	FALSE	15169800	8743200	1.735039802	55847	C10orf70;CISD1
A0A024QZN9;A0A0A0MR02;A0A024QZT0;P45880-2;P45880;P45880-1;B4DKM5;Q5JSD2;Q5JSD1	VDAC2	10	13	51.4	111	0	127.33	322200000	248760000	385900000	335380000	311480000	414840000	312100000	VDAC2	203	322200000	248760000	385900000	335380000	311480000	414840000	FALSE	FALSE	FALSE	FALSE	FALSE	FALSE	320744000	414840000	0.7731752	7417	VDAC2
Q53FJ5;A0A024QZQ2;C9JIZ6;Q59EN5;P07602;P07602-2;P07602-3;B4DRB7;B4DEK5;Q5BJH1	PSAP	11	20	43.9	98	0	96.652	335030000	570520000	2.05E+08	194930000	167690000	377950000	212230000	PSAP	291	335030000	570520000	2.05E+08	194930000	167690000	377950000	FALSE	FALSE	FALSE	FALSE	FALSE	FALSE	294634000	377950000	0.779558143	5660	PSAP
B3KPC1;A0A024QZR3;Q9BRX2	hCG_2002731;PELO	3	5	14	16	0	13.865	7106000	7122900	7728700	7700600	8222600	7702200	6831200	hCG_2002731	2433	7106000	7122900	7728700	7700600	8222600	7702200	FALSE	FALSE	FALSE	FALSE	FALSE	FALSE	7576160	7702200	0.983635844	53918	PELO
Q8NDP0;A0A024QZR5;Q9Y2T2;B4DRN6	DKFZp586G1518;AP3M1	10	10	44.8	20	0	22.439	25200000	20992000	22096000	24035000	17855000	23906000	23016000	DKFZp586G1518	1497	25200000	20992000	22096000	24035000	17855000	23906000	FALSE	FALSE	FALSE	FALSE	FALSE	FALSE	22035600	23906000	0.921760228	26985	AP3M1
A0A024QZS1;O96007	MOCS2	2	2	18.6	8	0	8.1548	3197100	2637000	3800300	2857800	3290900	3701200	4870700	MOCS2	2722	3197100	2637000	3800300	2857800	3290900	3701200	FALSE	FALSE	FALSE	FALSE	FALSE	FALSE	3156620	3701200	0.852863936	4338	MOCS2
B2R6X6;A0A024QZS4;P30405;R4GN99;H0Y548;P30405-2	PPIF	6	4	47.8	16	0	62.355	31947000	28645000	9301500	6143900	7249700	9195200	31857000	PPIF	1273	31947000	28645000	9301500	6143900	7249700	9195200	FALSE	FALSE	FALSE	FALSE	FALSE	FALSE	16657420	9195200	1.811534279	10105	PPIF
B3KPN7;A0A024QZT2;Q96KP1;B4DZI7	EXOC2	4	2	2.9	6	0	4.6445	0	0	3396200	3481900	0	3433600	723260	EXOC2	3922	1066461.644	1045040.763	3396200	3481900	1618404.774	3433600	TRUE	TRUE	FALSE	FALSE	TRUE	FALSE	2121601.436	3433600	0.617894174	55770	EXOC2
Q6IBN4;Q53HG3;Q53GC8;A0A0C4DGA2;A0A024QZU5;O75521-2;O75521	PECI;ECI2	14	5	17.9	12	0	16.851	10460000	6730500	14998000	9622700	10442000	13009000	9557500	PECI	2156	10460000	6730500	14998000	9622700	10442000	13009000	FALSE	FALSE	FALSE	FALSE	FALSE	FALSE	10450640	13009000	0.803339227	10455	ECI2;PECI
Q9BS45;A0A024QZW0;P51580	TPMT	4	8	29.8	18	0	44.938	41775000	15158000	26999000	20224000	17316000	16319000	23788000	TPMT	1475	41775000	15158000	26999000	20224000	17316000	16319000	FALSE	FALSE	FALSE	FALSE	FALSE	FALSE	24294400	16319000	1.488718671	7172	TPMT
A0A024QZW7;P49790-2;P49790;P49790-3	NUP153	4	10	9.6	13	0	20.435	7325400	9714000	11456000	12344000	9349400	12025000	2808100	NUP153	3130	7325400	9714000	11456000	12344000	9349400	12025000	FALSE	FALSE	FALSE	FALSE	FALSE	FALSE	10037760	12025000	0.834740956	9972	NUP153
A0A024QZX3;A0A024QZX5;A0A087X1N8;P35237;Q8IXH2	SERPINB6	6	15	55.3	41	0	104.78	66373000	341200000	41472000	26281000	39817000	70281000	77562000	SERPINB6	702	66373000	341200000	41472000	26281000	39817000	70281000	FALSE	FALSE	FALSE	FALSE	FALSE	FALSE	103028600	70281000	1.465952391	5269	SERPINB6
B2R7M3;A0A024QZY1;Q13155;A8MU58;F8W950	JTV1;AIMP2	5	7	28.4	39	0	48.582	34168000	29692000	38883000	47356000	41241000	45433000	42243000	JTV1	1089	34168000	29692000	38883000	47356000	41241000	45433000	FALSE	FALSE	FALSE	FALSE	FALSE	FALSE	38268000	45433000	0.842295248	7965	AIMP2;JTV1
A0A024QZY5;Q13523;B4DZQ5;H0YDJ3	PRPF4B	5	4	4.5	6	0	10.115	5055800	3532100	2764900	0	0	2743000	1267900	PRPF4B	3673	5055800	3532100	2764900	2892735.74	2122532.757	2743000	FALSE	FALSE	FALSE	TRUE	TRUE	FALSE	3273613.699	2743000	1.193442836	8899	PRPF4B
Q0D2M2;B2R4S9;A8K9J7;A0A024RCL8;A0A024RCJ9;A0A024QZZ7;I6L9F7;U3KQK0;B4DR52;Q99879;Q99877;Q93079;Q5QNW6;P62807;P58876;O60814;Q5QNW6-2;Q99880;P57053	HIST1H2BC;HIST1H2BI;HIST1H2BK;HIST1H2BN;HIST1H2BD;HIST1H2BM;HIST1H2BH;HIST2H2BF;HIST1H2BL;H2BFS	20	2	52.4	50	0	17.305	368570000	370510000	602110000	547810000	748880000	538800000	1.10E+09	HIST1H2BC	41	368570000	370510000	602110000	547810000	748880000	538800000	FALSE	FALSE	FALSE	FALSE	FALSE	FALSE	527576000	538800000	0.979168523	8339	HIST1H2BN;HIST1H2BD;HIST1H2BM;H2BFS;HIST1H2BC;HIST1H2BC; HIST1H2BE; HIST1H2BF; HIST1H2BG; HIST1H2BI;HIST1H2BH;HIST1H2BI;HIST1H2BK;HIST1H2BL;HIST2H2BF
Q53F27;A0A024R001;Q9P0S9	TMEM14C	3	2	24.1	15	0	20.549	22278000	4536600	28316000	36985000	10723000	32674000	93267000	TMEM14C	597	22278000	4536600	28316000	36985000	10723000	32674000	FALSE	FALSE	FALSE	FALSE	FALSE	FALSE	20567720	32674000	0.629482769	51522	TMEM14C
B2RAW0;A0A024R036;P98082-2;P98082-3;P98082	DAB2	9	7	10.9	14	0	20.156	27472000	14599000	0	0	0	17076000	8779200	DAB2	2216	27472000	14599000	4118819.579	1261874.137	2401824.447	17076000	FALSE	FALSE	TRUE	TRUE	TRUE	FALSE	9970703.633	17076000	0.583901595	1601	DAB2
A0A024R040;P55809;Q6IAV5;E9PDW2;B7Z609	OXCT1;OXCT	10	12	32.5	54	0	69.268	13719000	46498000	44964000	37846000	53068000	34863000	22476000	OXCT1	1510.5	13719000	46498000	44964000	37846000	53068000	34863000	FALSE	FALSE	FALSE	FALSE	FALSE	FALSE	39219000	34863000	1.124946218	5019	OXCT1
B2R6K4;A0A024R056;P62873;P62873-2;F6UT28;B1AKQ8;F6X3N5	GNB1	20	7	47.9	34	0	144.45	33784000	35988000	31666000	27943000	47485000	53145000	61490000	GNB1	834	33784000	35988000	31666000	27943000	47485000	53145000	FALSE	FALSE	FALSE	FALSE	FALSE	FALSE	35373200	53145000	0.665597893	2782	GNB1
Q8N995;Q5XJ04;A0A024R059;Q01581	HMGCS1	9	16	38.5	30	0	37.624	32274000	26634000	18639000	40545000	25630000	6006800	27275000	HMGCS1	1379	32274000	26634000	18639000	40545000	25630000	6006800	FALSE	FALSE	FALSE	FALSE	FALSE	FALSE	28744400	6006800	4.785309982	3157	HMGCS1
A0A024R071;O75694;B4DLT2;O75694-2;E9PF10	NUP155	7	26	25.7	82	0	120.15	56842000	53672000	55742000	66855000	80170000	59416000	17203000	NUP155	1713	56842000	53672000	55742000	66855000	80170000	59416000	FALSE	FALSE	FALSE	FALSE	FALSE	FALSE	62656200	59416000	1.054534132	9631	NUP155
C9J979;A0A024R073;A0A024R0F2;Q5TA45-2;Q5TA45-3;Q5TA45;E9PMA2;A0A0D9SGA8;H0YE15;E9PJG0;E9PKA4;E9PNS4;A0A087WXT8;Q96HV7;C9IYS7;A0A087WYI0;Q5TA45-4;Q5TA45-5	CPSF3L	18	2	6.4	4	0	4.6297	3724800	3210000	0	0	0	3318400	2919400	CPSF3L	3108	3724800	3210000	4019310.202	1635735.836	6735842.212	3318400	FALSE	FALSE	TRUE	TRUE	TRUE	FALSE	3865137.65	3318400	1.164759417	54973	INTS11;CPSF3L
A0A024R084;Q9BRK5;A0A024R0A9;Q9BRK5-6;G3V1E2;Q9BRK5-4;Q9BRK5-3;H0Y3T6;Q9BRK5-2	SDF4	10	10	34.5	34	0	37.585	36111000	26528000	13058000	15221000	29300000	17466000	27792000	SDF4	1371	36111000	26528000	13058000	15221000	29300000	17466000	FALSE	FALSE	FALSE	FALSE	FALSE	FALSE	24043600	17466000	1.376594527	51150	SDF4
A0A024R094;Q9H074-3;Q9H074-2;Q9H074;D6REB4	PAIP1	10	8	33	24	0	18.152	25440000	27661000	19474000	26709000	26549000	14982000	33775000	PAIP1	1233	25440000	27661000	19474000	26709000	26549000	14982000	FALSE	FALSE	FALSE	FALSE	FALSE	FALSE	25166600	14982000	1.67978908	10605	PAIP1
H0Y360;B2RB47;A0A024R098;Q01433-2;Q01433;Q01433-5;Q01433-3;Q01433-4	AMPD2	12	7	7.8	15	0	10.004	11964000	6478400	11383000	18794000	17020000	9206900	5156200	AMPD2	2680	11964000	6478400	11383000	18794000	17020000	9206900	FALSE	FALSE	FALSE	FALSE	FALSE	FALSE	13127880	9206900	1.425874073	271	AMPD2
A0A024R0A8;O43865;Q2NKW8;V5YQL4;O43865-2;Q6ZMM9;H0Y8B3;Q6ZNS6;Q96HN2-4;Q96HN2-3;Q96HN2-2;Q96HN2	AHCYL1;FGFR2-AHCYL1;AHCYL2	15	11	24.5	28	0	59.192	45424000	27182000	30095000	29330000	38329000	33879000	26773000	AHCYL1	1399	45424000	27182000	30095000	29330000	38329000	33879000	FALSE	FALSE	FALSE	FALSE	FALSE	FALSE	34072000	33879000	1.005696744	10768	AHCYL1;AHCYL2;FGFR2-AHCYL1
Q2TB59;A0A024R0C3;Q13423;E9PCX7	NNT	11	31	35.5	137	0	186.78	247670000	172680000	210130000	100450000	143590000	86238000	86648000	NNT	634	247670000	172680000	210130000	100450000	143590000	86238000	FALSE	FALSE	FALSE	FALSE	FALSE	FALSE	174904000	86238000	2.028154642	23530	NNT
A0A024R0E2;O75534;O75534-4;Q9GZV0;A0A024R0K2;O75534-2;O75534-3;Q96L66;E9PLT0	CSDE1;UNR	16	30	41.1	98	0	180.51	146810000	96137000	79816000	99417000	127760000	66535000	40440000	CSDE1	1118	146810000	96137000	79816000	99417000	127760000	66535000	FALSE	FALSE	FALSE	FALSE	FALSE	FALSE	109988000	66535000	1.653084843	7812	CSDE1;UNR
A0A024R0E5;P52907;A8K0T9	CAPZA1	3	11	69.2	80	0	181.98	102110000	97607000	60364000	72094000	76379000	112350000	133390000	CAPZA1	450	102110000	97607000	60364000	72094000	76379000	112350000	FALSE	FALSE	FALSE	FALSE	FALSE	FALSE	81710800	112350000	0.727287939	829	CAPZA1
H0Y612;E7EN20;A0A024R0F6;Q9UPN9-2;Q9UPN9	TRIM33	12	5	6.4	9	0	37.403	9114100	3953900	2242500	4492500	4273500	3584700	2304200	TRIM33	3274	9114100	3953900	2242500	4492500	4273500	3584700	FALSE	FALSE	FALSE	FALSE	FALSE	FALSE	4815300	3584700	1.343292326	51592	TRIM33
A0A024R0H7;Q9BQA1;H0Y711;Q9BQA1-2	WDR77	5	7	28.9	19	0	26.373	18970000	19128000	15604000	18087000	18395000	10234000	26925000	WDR77	1391	18970000	19128000	15604000	18087000	18395000	10234000	FALSE	FALSE	FALSE	FALSE	FALSE	FALSE	18036800	10234000	1.762438929	79084	WDR77
A8K3W4;A0A024R0J9;A0A0A0MRA5;B7Z4B8;A8K6U7;Q9BUJ2-4;Q9BUJ2-2;Q9BUJ2;Q9BUJ2-3;A8K5K0;M0R3F1;M0QYZ0	HNRPUL1;HNRNPUL1	19	24	35.4	88	0	206.51	69684000	72765000	75247000	72045000	76286000	194690000	52379000	HNRPUL1	932	69684000	72765000	75247000	72045000	76286000	194690000	FALSE	FALSE	FALSE	FALSE	FALSE	FALSE	73205400	194690000	0.376010067	11100	HNRNPUL1;HNRPUL1
A0A024R0L6;Q15102;M0R389;M0R1K3	PAFAH1B3	7	8	35.5	35	0	22.833	36562000	33188000	38887000	36710000	38409000	56911000	61747000	PAFAH1B3	831	36562000	33188000	38887000	36710000	38409000	56911000	FALSE	FALSE	FALSE	FALSE	FALSE	FALSE	36751200	56911000	0.645766196	5050	PAFAH1B3
Q0VAB1;A0A024R0M6;Q3ZCQ8;Q3ZCQ8-2;Q3ZCQ8-3;M0R0C3;M0R2F8;M0R003	TIMM50	15	10	24.1	55	0	153.37	74970000	74862000	90488000	84987000	64148000	46656000	71201000	TIMM50	753	74970000	74862000	90488000	84987000	64148000	46656000	FALSE	FALSE	FALSE	FALSE	FALSE	FALSE	77891000	46656000	1.669474451	92609	TIMM50
A0A024R0P9;O96008;O96008-2;K7EJ57	TOMM40	5	10	44.3	57	0	98.322	33284000	39471000	42796000	52782000	53953000	72640000	91765000	TOMM40	604	33284000	39471000	42796000	52782000	53953000	72640000	FALSE	FALSE	FALSE	FALSE	FALSE	FALSE	44457200	72640000	0.612020925	10452	TOMM40
A0A024R0Q4;Q8IV08;B4DEL6	PLD3	3	4	8.6	6	0	9.1826	4795700	0	4504500	4603600	0	29291000	7324400	PLD3	2369	4795700	1362620.153	4504500	4603600	3338002.922	29291000	FALSE	TRUE	FALSE	FALSE	TRUE	FALSE	3720884.615	29291000	0.127031669	23646	PLD3
Q9BPW0;H0YDU8;Q53FR0;A0A024R0Q7;P53041;B4DLP6;B2R6R6;B4DDZ8	PPP5C	11	9	22.1	52	0	53.875	44980000	42694000	34409000	27449000	28834000	41410000	29599000	PPP5C	1312	44980000	42694000	34409000	27449000	28834000	41410000	FALSE	FALSE	FALSE	FALSE	FALSE	FALSE	35673200	41410000	0.861463415	5536	PPP5C
A0A024R0R1;M0QZR4;Q92888;Q92888-3;Q92888-2;Q92888-4;M0QYC1	ARHGEF1	15	18	24.1	38	0	45.888	19390000	27807000	25557000	23803000	27618000	29237000	10036000	ARHGEF1	2113	19390000	27807000	25557000	23803000	27618000	29237000	FALSE	FALSE	FALSE	FALSE	FALSE	FALSE	24835000	29237000	0.849437357	9138	ARHGEF1
A0A024R0R4;Q9UBE0;M0QZS6;B3KNJ4;Q9UBE0-2;Q9UBE0-3;M0QX65	SAE1	13	15	51.4	46	0	41.262	77114000	82933000	53871000	66056000	55610000	82546000	64466000	SAE1	815	77114000	82933000	53871000	66056000	55610000	82546000	FALSE	FALSE	FALSE	FALSE	FALSE	FALSE	67116800	82546000	0.813083614	10055	SAE1
B7Z6F7;A0A024R0R6;Q92797;A0A087WUE9;Q4LE61;M0R3C7;Q92797-2	SYMPK;SYMPK variant protein	11	10	12.7	13	0	17.09	7868700	6274600	7241300	8056100	0	5922700	1922600	SYMPK	3387	7868700	6274600	7241300	8056100	1710640.272	5922700	FALSE	FALSE	FALSE	FALSE	TRUE	FALSE	6230268.054	5922700	1.051930379	8189	SYMPK;SYMPK variant protein
A0A024R0R9;P54920;M0R0Y2;M0R2M1	NAPA	18	15	66.1	86	0	190.42	93948000	79052000	52097000	64018000	70415000	128170000	93520000	NAPA	595	93948000	79052000	52097000	64018000	70415000	128170000	FALSE	FALSE	FALSE	FALSE	FALSE	FALSE	71906000	128170000	0.56102052	8775	NAPA
A0A024R0S6;Q9NZN4;B4DLA1;Q9NZN4-2;B3KUH4;Q8NCJ3	EHD2	9	22	48.8	44	0	158.09	0	0	2500300	0	6467200	403740000	38498000	EHD2	1147	1387380.389	1794116.409	2500300	2140676.504	6467200	403740000	TRUE	TRUE	FALSE	TRUE	FALSE	FALSE	2857934.66	403740000	0.007078651	30846	EHD2
A0A0S2Z4N8;A0A024R0V4;P50552;A0A0S2Z4I9;A0A0S2Z4I7	VASP	11	13	42.4	47	0	170.13	33202000	24573000	24208000	32525000	33036000	96812000	41999000	VASP	1097	33202000	24573000	24208000	32525000	33036000	96812000	FALSE	FALSE	FALSE	FALSE	FALSE	FALSE	29508800	96812000	0.304805189	7408	VASP
A8K6H9;A0A024R0W3;Q96QD8;F8VUY8;Q96QD8-2	SLC38A2	5	2	7.3	9	0	5.5669	6035800	0	0	0	3168000	5723700	6196500	SLC38A2	2501	6035800	2033838.028	2788329.436	2419993.639	3168000	5723700	FALSE	TRUE	TRUE	TRUE	FALSE	FALSE	3289192.221	5723700	0.574661883	54407	SLC38A2
A0A024R0Y2;B2ZZ90;Q13085-3;Q13085-2;Q13085;Q13085-4;A2NX49	hCG_30204;ACACA	23	29	18.4	53	0	56.883	40987000	44116000	67223000	69619000	76208000	24099000	7164500	hCG_30204	2390	40987000	44116000	67223000	69619000	76208000	24099000	FALSE	FALSE	FALSE	FALSE	FALSE	FALSE	59630600	24099000	2.474401427	31	ACACA
A0A024R0Y5;P08237;P08237-3;A0A0S2Z4A1;Q96I60;A0A0S2Z4I1;P08237-2;B4E162;Q7KYX9	PFKM	25	21	38.6	98	0	314.34	325310000	192470000	231030000	234350000	198920000	66028000	123600000	PFKM	476	325310000	192470000	231030000	234350000	198920000	66028000	FALSE	FALSE	FALSE	FALSE	FALSE	FALSE	236416000	66028000	3.580541588	5213	PFKM
A0A024R3Q3;A0A024R0Y6;P84077;P61204;B4DEB9;F5H423;B4DJC8;B4DN70;F5H0C7;B4E190;P61204-2	ARF1;ARF3	15	4	58.6	24	0	90.6	143440000	78116000	116220000	94261000	100710000	86114000	191660000	ARF1	319	143440000	78116000	116220000	94261000	100710000	86114000	FALSE	FALSE	FALSE	FALSE	FALSE	FALSE	106549400	86114000	1.237306361	375	ARF1;ARF3
B3KY11;A0A024R0Z3;Q9BUQ8;A8KA56	DDX23	7	10	12.5	21	0	19.254	13972000	11784000	24655000	20568000	14540000	14757000	7513000	DDX23	2347	13972000	11784000	24655000	20568000	14540000	14757000	FALSE	FALSE	FALSE	FALSE	FALSE	FALSE	17103800	14757000	1.159029613	9416	DDX23
F8VWL0;A0A024R120;Q12800-2;Q12800-3;Q12800-4;Q12800;F8VX55	TFCP2	7	2	7.6	4	0	7.4504	4057700	0	3894700	4142100	0	0	3013600	TFCP2	3089	4057700	5789811.121	3894700	4142100	1473603.801	1654434.978	FALSE	TRUE	FALSE	FALSE	TRUE	TRUE	3871582.984	1654434.978	2.340123991	7024	TFCP2
F8VYY9;A0A024R125;P54619-2;P54619;P54619-3;H0YHF8;H0YIC9	PRKAG1	16	6	25	10	0	10.043	9803800	13876000	12065000	11784000	13691000	13258000	13037000	PRKAG1	1910	9803800	13876000	12065000	11784000	13691000	13258000	FALSE	FALSE	FALSE	FALSE	FALSE	FALSE	12243960	13258000	0.923514859	5571	PRKAG1
A0A024R151;Q8WWI5-3;Q8WWI5-2;Q8WWI5;B3KWF2;B3KMS7	SLC44A1	6	4	7.8	7	0	9.355	12119000	2532800	5662100	3925400	2923300	2046200	2405800	SLC44A1	3244	12119000	2532800	5662100	3925400	2923300	2046200	FALSE	FALSE	FALSE	FALSE	FALSE	FALSE	5432520	2046200	2.654931092	23446	SLC44A1
A8K984;A0A024R158;O95347-2;O95347;B7ZLZ7;B3KMB1;Q05BV1;Q2KQ72	SMC2L1;SMC2	18	26	26.8	65	0	65.754	62134000	47797000	47054000	44043000	58890000	74900000	16230000	SMC2L1	1755	62134000	47797000	47054000	44043000	58890000	74900000	FALSE	FALSE	FALSE	FALSE	FALSE	FALSE	51983600	74900000	0.694040053	10592	SMC2;SMC2L1
A0A024R169;Q9NXF1-2;Q9NXF1;B4DQR0	TEX10	7	11	14.9	33	0	65.05	12311000	7666200	17785000	18347000	10202000	14584000	4519600	TEX10	2778	12311000	7666200	17785000	18347000	10202000	14584000	FALSE	FALSE	FALSE	FALSE	FALSE	FALSE	13262240	14584000	0.909369172	54881	TEX10
A0A024R179;Q09161	NCBP1	4	15	24.3	53	0	50.247	24782000	29975000	27320000	28074000	26021000	48661000	15492000	NCBP1	1793	24782000	29975000	27320000	28074000	26021000	48661000	FALSE	FALSE	FALSE	FALSE	FALSE	FALSE	27234400	48661000	0.559676127	4686	NCBP1
A0A024R191;Q7Z4W7;P57729	RAB38	4	3	44.5	11	0	24.77	9870500	7198000	7355000	14243000	5992700	0	9915000	RAB38	2125	9870500	7198000	7355000	14243000	5992700	3479742.063	FALSE	FALSE	FALSE	FALSE	FALSE	TRUE	8931840	3479742.063	2.566810941	23682	RAB38
A0A024R1A3;P22314-2;P22314;B4DDE4;B4DL67	UBE1;UBA1	14	38	49.4	270	0	323.31	460960000	400470000	496350000	483620000	436960000	640220000	169310000	UBE1	360	460960000	400470000	496350000	483620000	436960000	640220000	FALSE	FALSE	FALSE	FALSE	FALSE	FALSE	455672000	640220000	0.711742838	7317	UBA1;UBE1
A0A024R1K7;Q04917;B2R6N6;A2IDB2;Q9H4N8	YWHAH	7	12	58.9	78	0	323.31	134930000	167130000	181480000	177150000	226820000	208580000	186090000	YWHAH	326	134930000	167130000	181480000	177150000	226820000	208580000	FALSE	FALSE	FALSE	FALSE	FALSE	FALSE	177502000	208580000	0.851002014	7533	YWHAH
A0A024R1K8;Q15459;Q15459-2;B4E091	SF3A1	7	24	36.2	77	0	70.321	90160000	99771000	86139000	111700000	110140000	91088000	49971000	SF3A1	963	90160000	99771000	86139000	111700000	110140000	91088000	FALSE	FALSE	FALSE	FALSE	FALSE	FALSE	99582000	91088000	1.093250483	10291	SF3A1
A0A024R1M8;J3KQL8;B4E1T5;Q9BQE5	APOL2	5	6	17.2	25	0	28.714	47166000	35103000	25242000	15511000	35218000	14447000	34533000	APOL2	1226	47166000	35103000	25242000	15511000	35218000	14447000	FALSE	FALSE	FALSE	FALSE	FALSE	FALSE	31648000	14447000	2.190627812	23780	APOL2
A0A024R1N1;P35579;P35579-2;Q86XU5	MYH9	30	15	65.2	93	0	323.31	278050000	368480000	229710000	185660000	258850000	1078500000	77461000	MYH9	703	278050000	368480000	229710000	185660000	258850000	1078500000	FALSE	FALSE	FALSE	FALSE	FALSE	FALSE	264150000	1078500000	0.244923505	4627	MYH9
A0A024R1N4;P12956;B1AHC9;B2RDN9;P12956-2;B4DE32;B4E356	XRCC6	8	34	57.8	336	0	323.31	682010000	545980000	511910000	554470000	612200000	575270000	306020000	XRCC6	210	682010000	545980000	511910000	554470000	612200000	575270000	FALSE	FALSE	FALSE	FALSE	FALSE	FALSE	581314000	575270000	1.010506371	2547	XRCC6
A6PVD3;A0A024R1N6;P56693-2;P56693	SOX10	11	7	50.7	18	0	24.609	15119000	23998000	13995000	16399000	17921000	0	23309000	SOX10	1489	15119000	23998000	13995000	16399000	17921000	3391258.688	FALSE	FALSE	FALSE	FALSE	FALSE	TRUE	17486400	3391258.688	5.156315577	6663	SOX10
B4DIU6;A0A024R1P7;B4E2A6;Q9UH99-3;Q9UH99;Q9UH99-2;A8K129;Q6NT72	UNC84B;SUN2	13	15	27.2	36	0	57.768	26955000	18492000	60786000	47371000	81593000	26678000	15477000	UNC84B	1795	26955000	18492000	60786000	47371000	81593000	26678000	FALSE	FALSE	FALSE	FALSE	FALSE	FALSE	47039400	26678000	1.763228128	25777	SUN2;UNC84B
A0A024R1Q5;P17050	NAGA	2	5	14.1	12	0	15.83	19081000	10285000	11299000	0	0	11179000	10313000	NAGA	2091	19081000	10285000	11299000	6731790.505	2127313.461	11179000	FALSE	FALSE	FALSE	TRUE	TRUE	FALSE	9904820.793	11179000	0.886020287	4668	NAGA
Q9BTQ7;A0A024R1Q8;P62829;J3KT29;J3KTJ3;C9JD32	RPL23	9	7	64.9	56	0	264.06	219180000	206710000	203390000	255060000	225340000	190550000	390580000	RPL23	171	219180000	206710000	203390000	255060000	225340000	190550000	FALSE	FALSE	FALSE	FALSE	FALSE	FALSE	221936000	190550000	1.164712674	9349	RPL23
A0A024R1S5;O00178;B2RDW9	GTPBP1	6	6	10.8	10	0	24.396	0	11884000	10544000	21205000	8403700	19507000	8171500	GTPBP1	2285	1822399.864	11884000	10544000	21205000	8403700	19507000	TRUE	FALSE	FALSE	FALSE	FALSE	FALSE	10771819.97	19507000	0.552202798	9567	GTPBP1
J3QKS7;B4DGM3;A0A024R1S7;Q969G3-2;Q969G3;Q969G3-6;Q969G3-5;Q969G3-3;Q969G3-4;K7EMQ8	SMARCE1	17	6	31.9	12	0	22.74	7639600	11921000	7325600	5475200	8602200	5979700	8320800	SMARCE1	2265	7639600	11921000	7325600	5475200	8602200	5979700	FALSE	FALSE	FALSE	FALSE	FALSE	FALSE	8192720	5979700	1.3700888	6605	SMARCE1
A0A024R1S8;Q14847;Q14847-2;A8K1D2;C9J9W2;B4DIC4;B4DJI4;Q14847-3	LASP1	15	14	46.7	70	0	75.609	48152000	149150000	80165000	83823000	108280000	222380000	142620000	LASP1	421	48152000	149150000	80165000	83823000	108280000	222380000	FALSE	FALSE	FALSE	FALSE	FALSE	FALSE	93914000	222380000	0.422313158	3927	LASP1
A0A024R1T5;P09543-2;P09543;B4DI06	CNP	9	21	49.4	75	0	182.51	120900000	156930000	200330000	196510000	205640000	85865000	79699000	CNP	688	120900000	156930000	200330000	196510000	205640000	85865000	FALSE	FALSE	FALSE	FALSE	FALSE	FALSE	176062000	85865000	2.05045129	1267	CNP
A0A024R1T9;Q4LE36;P53396;A0A024R1Y2;P53396-2;P53396-3;Q8N9C4	ACLY;ACLY variant protein	9	48	51.4	281	0	323.31	476740000	457980000	561820000	637190000	538270000	382910000	139520000	ACLY	432	476740000	457980000	561820000	637190000	538270000	382910000	FALSE	FALSE	FALSE	FALSE	FALSE	FALSE	534400000	382910000	1.395628216	47	ACLY;ACLY variant protein
A0A024R1U0;P46060;B4DY16;B4E0U0	RANGAP1	10	24	43.4	116	0	199.02	120830000	89661000	88734000	107180000	138650000	123890000	73224000	RANGAP1	739	120830000	89661000	88734000	107180000	138650000	123890000	FALSE	FALSE	FALSE	FALSE	FALSE	FALSE	109011000	123890000	0.879901526	5905	RANGAP1
A0A024R1U2;Q7RTV0	PHF5A	2	5	48.2	24	0	19.891	23571000	19331000	13165000	16759000	18285000	14996000	39221000	PHF5A	1132	23571000	19331000	13165000	16759000	18285000	14996000	FALSE	FALSE	FALSE	FALSE	FALSE	FALSE	18222200	14996000	1.21513737	84844	PHF5A
A0A024R1U4;P51148;P51148-2;K7ERI8;K7ERQ8;F8VVK3	RAB5C	16	6	60.6	47	0	181.94	58866000	56963000	59984000	71078000	63449000	37230000	85339000	RAB5C	647	58866000	56963000	59984000	71078000	63449000	37230000	FALSE	FALSE	FALSE	FALSE	FALSE	FALSE	62068000	37230000	1.667150148	5878	RAB5C
E4W6B6;A0A024R1V4;P61353;B2R4D8;K7ELC7;K7EQQ9	RPL27	8	7	53.2	86	0	72.649	223510000	286450000	307710000	311880000	302120000	277210000	790770000	RPL27	71	223510000	286450000	307710000	311880000	302120000	277210000	FALSE	FALSE	FALSE	FALSE	FALSE	FALSE	286334000	277210000	1.032913676	6155	RPL27
A0A024R1W3;Q96AY3;Q658U4;B4DJJ5;Q6ZME7;Q8NAG5	FKBP10;DKFZp666D193	12	19	37.6	67	0	69.347	86334000	65121000	103690000	95690000	137610000	71320000	38460000	FKBP10	1149	86334000	65121000	103690000	95690000	137610000	71320000	FALSE	FALSE	FALSE	FALSE	FALSE	FALSE	97689000	71320000	1.369727987	60681	FKBP10;DKFZp666D193
A0A024R1X3;Q9BRG1;K7ENE3;K7EKV4	VPS25	4	4	23.3	8	0	8.391	0	11839000	5346000	0	2948000	3844100	8435200	VPS25	2254	2063673.202	11839000	5346000	3354529.394	2948000	3844100	TRUE	FALSE	FALSE	TRUE	FALSE	FALSE	5110240.519	3844100	1.32937242	84313	VPS25
K7ESN3;A0A024R1Y7;Q8N2G8-2;Q8N2G8-3;Q8N2G8;B3KVB0	GHDC;LGP1	9	3	6.3	6	0	5.2742	3050500	2626700	3235400	3000700	2872700	0	2009300	GHDC	3363	3050500	2626700	3235400	3000700	2872700	2307317.229	FALSE	FALSE	FALSE	FALSE	FALSE	TRUE	2957200	2307317.229	1.281661647	84514	GHDC;LGP1
A0A024R1Z6;Q99536;Q99536-3;B3KUF8;Q99536-2	VAT1	11	18	59.5	174	0	303.9	270010000	344440000	285840000	260430000	261050000	119830000	319600000	VAT1	197	270010000	344440000	285840000	260430000	261050000	119830000	FALSE	FALSE	FALSE	FALSE	FALSE	FALSE	284354000	119830000	2.372978386	10493	VAT1
V9HWJ8;A0A024R203;P61289;P61289-3;P61289-2;K9J957;Q6FHK7;B3KQ25;K7ESG5;A0A087WTV2;K7ENH2;J7FRP4	HEL-S-283;PSME3	16	13	46.1	81	0	154.22	96040000	97105000	63918000	62972000	92297000	42227000	103990000	HEL-S-283	552	96040000	97105000	63918000	62972000	92297000	42227000	FALSE	FALSE	FALSE	FALSE	FALSE	FALSE	82466400	42227000	1.952930589	10197	PSME3;HEL-S-283
A0A024R222;B4DHQ3;Q9Y617;A0A024R280;Q9Y617-2	PSAT1	7	16	49.7	106	0	102.98	147550000	121210000	136410000	161700000	181530000	357730000	130870000	PSAT1	453	147550000	121210000	136410000	161700000	181530000	357730000	FALSE	FALSE	FALSE	FALSE	FALSE	FALSE	149680000	357730000	0.418416124	29968	PSAT1
B7Z2R3;A0A024R225;A0A024R233;B7Z954;Q9UDY2-4;Q9UDY2-2;Q9UDY2-6;Q9UDY2-3;Q9UDY2;Q9UDY2-7;Q9UDY2-5	TJP2	11	8	8.8	10	0	12.087	5846800	0	3344700	0	0	15531000	1652800	TJP2	3508	5846800	2840113.252	3344700	1728202.964	2118455.286	15531000	FALSE	TRUE	FALSE	TRUE	TRUE	FALSE	3175654.3	15531000	0.204471979	9414	TJP2
A0A024R229;Q9UHN6-2;Q9UHN6	TMEM2	8	6	5.1	7	0	14.075	3466300	4142200	6900400	0	0	5744600	674520	TMEM2	3954	3466300	4142200	6900400	1490486.309	2019086.914	5744600	FALSE	FALSE	FALSE	TRUE	TRUE	FALSE	3603694.645	5744600	0.627318637	23670	TMEM2
A0A024R258;B3KNI8;B3KNI2;A0A024R284;Q9UMX0-2;Q9UMX0;Q59FJ2	UBQLN1	10	4	21.2	30	0	280.28	40241000	29522000	19847000	19775000	18325000	41922000	42493000	UBQLN1	1083	40241000	29522000	19847000	19775000	18325000	41922000	FALSE	FALSE	FALSE	FALSE	FALSE	FALSE	25542000	41922000	0.609274367	29979	UBQLN1
A0A087WXM6;J3QQT2;J3KRX5;A0A024R261;A0A0A6YYL6;P18621;P18621-3;J3QLC8;A0A0A0MRF8;P18621-2;J3KRB3;A0A087WWH0;J3QS96;A0A087WY81	RPL17;hCG_24487;RPL17-C18orf32	17	10	55.6	119	0	222.29	205820000	222900000	294250000	334420000	325680000	257400000	497330000	RPL17	143	205820000	222900000	294250000	334420000	325680000	257400000	FALSE	FALSE	FALSE	FALSE	FALSE	FALSE	276614000	257400000	1.074646465	6139	RPL17
B3KQK4;A5PLM9;A0A024R276;P07711;Q9HBQ7;Q5T8F0	CTSL1;CTSL	15	4	13.5	10	0	25.94	18113000	9307800	0	0	0	30770000	17475000	CTSL1	1699.5	18113000	9307800	1211933.478	2145459.981	2682102.248	30770000	FALSE	FALSE	TRUE	TRUE	TRUE	FALSE	6692059.141	30770000	0.217486485	1514	CTSL
A0A024R277;Q6NUL7;O15269	SPTLC1	6	7	18	16	0	27.015	12197000	7803600	6564400	0	6975300	13781000	8871900	SPTLC1	2213	12197000	7803600	6564400	2136596.6	6975300	13781000	FALSE	FALSE	FALSE	TRUE	FALSE	FALSE	7135379.32	13781000	0.517769343	10558	SPTLC1
A0A024R2A7;P49257;Q53FS4;B2R774	LMAN1	6	17	40.4	54	0	55.105	76611000	73147000	73465000	77809000	90542000	92617000	72014000	LMAN1	750	76611000	73147000	73465000	77809000	90542000	92617000	FALSE	FALSE	FALSE	FALSE	FALSE	FALSE	78314800	92617000	0.845576946	3998	LMAN1
A8K5D8;A8K4G7;A0A024R2C5;O75351	VPS4B	7	6	22.7	16	0	21.855	16041000	20580000	23830000	20915000	17814000	18127000	13305000	VPS4B	1899.5	16041000	20580000	23830000	20915000	17814000	18127000	FALSE	FALSE	FALSE	FALSE	FALSE	FALSE	19836000	18127000	1.094279252	9525	VPS4B
B4DQT8;A0A024R2D4;Q9NVJ2;B4E1J8	ARL8B	5	4	51.4	12	0	41.686	8833700	0	11257000	10930000	12483000	10852000	16311000	ARL8B	1751	8833700	1441436.707	11257000	10930000	12483000	10852000	FALSE	TRUE	FALSE	FALSE	FALSE	FALSE	8989027.341	10852000	0.828329095	55207	ARL8B
A0A024R2E9;B3KQM6;B2RB57;O95352-3;O95352;B4DQK1;O95352-2	ATG7	13	7	12.9	8	0	12.947	11309000	9544900	0	0	0	21900000	5540400	ATG7	2616	11309000	9544900	1572779.369	2037149.486	1643977.528	21900000	FALSE	FALSE	TRUE	TRUE	TRUE	FALSE	5221561.277	21900000	0.238427456	10533	ATG7
H7C3J3;A0A024R2F4;Q9BV44	THUMPD3	3	3	12.6	6	0	8.4507	9466300	0	4748000	5312500	3927100	0	5421200	THUMPD3	2643	9466300	1239018.594	4748000	5312500	3927100	959392.2675	FALSE	TRUE	FALSE	FALSE	FALSE	TRUE	4938583.719	959392.2675	5.147616763	25917	THUMPD3
A0A024R2F9;Q9BTV4;A0A0S2Z5N2;Q8TEP9	TMEM43;FLJ00144	5	17	55	47	0	100.98	26217000	57942000	50664000	49082000	51428000	109980000	47443000	TMEM43	996	26217000	57942000	50664000	49082000	51428000	109980000	FALSE	FALSE	FALSE	FALSE	FALSE	FALSE	47066600	109980000	0.427955992	79188	TMEM43
D3YTB1;A0A024R2G7;F8W727;P62910	RPL32	6	8	52.6	83	0	79.368	237580000	234730000	316300000	316220000	293790000	270550000	547460000	RPL32	129	237580000	234730000	316300000	316220000	293790000	270550000	FALSE	FALSE	FALSE	FALSE	FALSE	FALSE	279724000	270550000	1.033908704	6161	RPL32
A0A024R2G8;O15084-2;O15084;O15084-4;O15084-1;B4DIW9	ANKRD28	10	4	6.7	11	0	15.433	2699200	0	6404900	13591000	5881400	3660800	2094400	ANKRD28	3337	2699200	1798216.095	6404900	13591000	5881400	3660800	FALSE	TRUE	FALSE	FALSE	FALSE	FALSE	6074943.219	3660800	1.659457829	23243	ANKRD28
B9A6K1;A0A024R2J9;A0A024R2H0;Q92609;Q92609-2;C9J3F6	TBC1D5	6	4	7	8	0	11.098	2384600	2946200	7128300	6449800	2444200	3976200	1754500	TBC1D5	3464	2384600	2946200	7128300	6449800	2444200	3976200	FALSE	FALSE	FALSE	FALSE	FALSE	FALSE	4270620	3976200	1.074045571	9779	TBC1D5
A0A024R2H7;Q96Q11-2;Q96Q11	TRNT1	6	8	23.3	17	0	14.826	8352900	8858500	7068900	13432000	9344300	15060000	7528300	TRNT1	2346	8352900	8858500	7068900	13432000	9344300	15060000	FALSE	FALSE	FALSE	FALSE	FALSE	FALSE	9411320	15060000	0.624921647	51095	TRNT1
A0A024R2K4;Q9Y608-2;Q9Y608-4;Q9Y608-5;Q9Y608;Q9Y608-3	LRRFIP2	8	7	13.5	7	0	13.152	6266400	8472800	0	0	0	10059000	3445900	LRRFIP2	2986	6266400	8472800	2060704.137	2700038.862	2901093.674	10059000	FALSE	FALSE	TRUE	TRUE	TRUE	FALSE	4480207.335	10059000	0.445392915	9209	LRRFIP2
B4DEN6;A0A024R2M6;P09110;H7C131;Q8NCW8;A0A140VJX0;C9JDE9;P09110-2;H0Y4D4;B4E072	ACAA1	12	8	37.1	28	0	33.607	9037300	19522000	13606000	15187000	10227000	7691300	14584000	ACAA1	1841	9037300	19522000	13606000	15187000	10227000	7691300	FALSE	FALSE	FALSE	FALSE	FALSE	FALSE	13515860	7691300	1.757292005	30	ACAA1
A0A024R2M7;O95747;C9JIG9	OXSR1	4	9	29	44	0	92.106	41276000	59119000	40137000	44642000	40369000	63215000	39070000	OXSR1	1135	41276000	59119000	40137000	44642000	40369000	63215000	FALSE	FALSE	FALSE	FALSE	FALSE	FALSE	45108600	63215000	0.71357431	9943	OXSR1
C9J9K3;A0A024R2P0;A0A0C4DG17;P08865;Q96RS2;A0A024R7P5	RPSA;LOC388524	8	15	69.7	121	0	323.31	524670000	546250000	575630000	602640000	660270000	535300000	728560000	RPSA	85	524670000	546250000	575630000	602640000	660270000	535300000	FALSE	FALSE	FALSE	FALSE	FALSE	FALSE	581892000	535300000	1.087039044	3921	RPSA;LOC388524
B4DIU0;B2RDZ9;A0A024R2P7;Q15024	EXOSC7	4	2	16.5	14	0	6.8186	4830900	4393200	6930800	6009800	8543800	7220800	10897000	EXOSC7	2048	4830900	4393200	6930800	6009800	8543800	7220800	FALSE	FALSE	FALSE	FALSE	FALSE	FALSE	6141700	7220800	0.850556725	23016	EXOSC7
B4DL06;B4DGU4;A0A024R2Q3;P35222;B4DSW9;B5BU28	CTNNB1	13	17	35.9	69	0	120.21	34249000	51689000	36861000	29528000	32434000	57890000	20462000	CTNNB1	1580	34249000	51689000	36861000	29528000	32434000	57890000	FALSE	FALSE	FALSE	FALSE	FALSE	FALSE	36952200	57890000	0.638317499	1499	CTNNB1
A0A024R2Q4;P61313;E7EQV9;E7ENU7;B4DLP4;E7EX53	RPL15	12	11	50	114	0	72.14	364830000	410930000	399890000	391750000	329450000	356950000	541870000	RPL15	133	364830000	410930000	399890000	391750000	329450000	356950000	FALSE	FALSE	FALSE	FALSE	FALSE	FALSE	379370000	356950000	1.062809917	6138	RPL15
H7BXY3;A0A024R2T6;Q7L2E3-3;Q7L2E3;Q7L2E3-2	DHX30	6	27	29	53	0	62.051	46084000	29010000	35381000	51221000	50727000	29211000	9287000	DHX30	2176	46084000	29010000	35381000	51221000	50727000	29211000	FALSE	FALSE	FALSE	FALSE	FALSE	FALSE	42484600	29211000	1.454404163	22907	DHX30
A0A024R2U9;C9JIF9;P13798;H7C393;H7C1U0	APEH	8	16	25	67	0	82.34	100210000	82928000	74074000	89511000	60131000	59714000	58052000	APEH	870	100210000	82928000	74074000	89511000	60131000	59714000	FALSE	FALSE	FALSE	FALSE	FALSE	FALSE	81370800	59714000	1.362675419	327	APEH
A0A0S2Z472;A8KAH7;A0A024R2W3;P13861-2;P13861	PRKAR2A	11	10	36.1	32	0	50.766	21890000	26842000	34037000	34356000	35900000	24098000	25512000	PRKAR2A	1433	21890000	26842000	34037000	34356000	35900000	24098000	FALSE	FALSE	FALSE	FALSE	FALSE	FALSE	30605000	24098000	1.270022408	5576	PRKAR2A
C9J8E1;B5BUJ8;B2R8Z2;A8K4K4;A0A024R2W7;Q16644;P49137-2;P49137	MAPKAPK3;MAPKAPK2	14	3	8.1	7	0.0007768	3.5791	11882000	0	3560500	5481300	6203000	3452800	6937300	MAPKAPK3	2415	11882000	1790619.885	3560500	5481300	6203000	3452800	FALSE	TRUE	FALSE	FALSE	FALSE	FALSE	5783483.977	3452800	1.675012737	7867	MAPKAPK3;MAPKAPK2
A0A024R2X1;A0A024R329;Q9Y5P6;Q9Y5P6-2	GMPPB	4	6	23.1	17	0	17.628	19006000	12281000	13449000	17846000	14211000	21263000	19723000	GMPPB	1613	19006000	12281000	13449000	17846000	14211000	21263000	FALSE	FALSE	FALSE	FALSE	FALSE	FALSE	15358600	21263000	0.72231576	29925	GMPPB
A0A024R306;Q9Y2S6	CCDC72;TMA7	3	3	29.7	16	0	10.693	24710000	24372000	23934000	37944000	30999000	41880000	289870000	CCDC72	217	24710000	24372000	23934000	37944000	30999000	41880000	FALSE	FALSE	FALSE	FALSE	FALSE	FALSE	28391800	41880000	0.677932187	51372	CCDC72;TMA7
A0A024R324;P61586;B4DKN9;Q9BVT0;Q5JR07;C9JNR4;C9JX21;Q5JR05	RHOA;ARHA;RHOC	16	3	44	26	0	55.515	29904000	34505000	40101000	40900000	34266000	37359000	127090000	RHOA	465	29904000	34505000	40101000	40900000	34266000	37359000	FALSE	FALSE	FALSE	FALSE	FALSE	FALSE	35935200	37359000	0.961888702	387	RHOA
A0A024R325;Q96I99;Q3ZCW5;E9PDQ8;Q96I99-2;B7Z2D5	SUCLG2	8	15	40.3	64	0	79.776	114250000	110810000	83773000	75546000	77768000	75591000	72434000	SUCLG2	747	114250000	110810000	83773000	75546000	77768000	75591000	FALSE	FALSE	FALSE	FALSE	FALSE	FALSE	92429400	75591000	1.222756677	8801	SUCLG2
A0A024R326;Q6IPI1;P47914	RPL29	3	2	14.6	24	0	13.358	58774000	61404000	106410000	150910000	117430000	90158000	339360000	RPL29	186	58774000	61404000	106410000	150910000	117430000	90158000	FALSE	FALSE	FALSE	FALSE	FALSE	FALSE	98985600	90158000	1.097912554	6159	RPL29
A0A024R328;Q05655;Q05655-2;B4DFV1	PRKCD	11	17	32.8	29	0	43.709	9385200	16561000	44554000	49639000	45406000	7099200	7646300	PRKCD	2331	9385200	16561000	44554000	49639000	45406000	7099200	FALSE	FALSE	FALSE	FALSE	FALSE	FALSE	33109040	7099200	4.663770566	5580	PRKCD
A0A024R333;Q6UXN9	TMEM113;WDR82	2	7	29.4	14	0	39.865	10285000	10622000	9328700	10820000	9653300	12301000	12706000	TMEM113	1932.5	10285000	10622000	9328700	10820000	9653300	12301000	FALSE	FALSE	FALSE	FALSE	FALSE	FALSE	10141800	12301000	0.824469555	80335	WDR82
B4DZZ0;B3KQB4;A0A024R371;O75915	ARL6IP5	8	7	37	30	0	91.428	26491000	37491000	46953000	46432000	38036000	67379000	115460000	ARL6IP5	497	26491000	37491000	46953000	46432000	38036000	67379000	FALSE	FALSE	FALSE	FALSE	FALSE	FALSE	39080600	67379000	0.580011576	10550	ARL6IP5
B4DL49;A0A024R374;P07858;A8K2H4;B4DMY4;B3KUJ8	CTSB	18	7	50.5	76	0	207.86	130170000	156890000	127030000	107190000	85711000	288550000	158870000	CTSB	380	130170000	156890000	127030000	107190000	85711000	288550000	FALSE	FALSE	FALSE	FALSE	FALSE	FALSE	121398200	288550000	0.420718073	1508	CTSB
A0A024R394;Q9UHD1;A0A024R3C3;Q9UHD1-2;E9PPQ5	CHORDC1	11	13	57.5	50	0	89.688	41356000	35460000	60690000	93955000	70527000	25653000	44027000	CHORDC1	1055	41356000	35460000	60690000	93955000	70527000	25653000	FALSE	FALSE	FALSE	FALSE	FALSE	FALSE	60397600	25653000	2.354406892	26973	CHORDC1
F8W7U8;A0A024R395;P49959-2;P49959;P49959-3;Q05D78	MRE11A	11	10	15.3	16	0	18.105	26869000	29413000	15657000	18989000	16998000	32367000	9734000	MRE11A	2146	26869000	29413000	15657000	18989000	16998000	32367000	FALSE	FALSE	FALSE	FALSE	FALSE	FALSE	21585200	32367000	0.666889115	4361	MRE11;MRE11A
E9PQS1;A0A087WT99;A8K718;A0A024R396;Q9H0W9-2;Q9H0W9;E9PPB5;E9PJU8;A0A024R3B0;Q9H0W9-4;Q9H0W9-3	C11orf54	16	3	20.9	10	0	7.8997	8015400	4829800	4114100	4272200	2620300	3092500	9740900	C11orf54	2143	8015400	4829800	4114100	4272200	2620300	3092500	FALSE	FALSE	FALSE	FALSE	FALSE	FALSE	4770360	3092500	1.542557801	28970	C11orf54
A0A024R3C4;Q7Z4H8;B2R8W4;Q7Z4H8-2;Q7Z4H8-3	KDELC2	6	6	16.2	14	0	30.165	2931600	5584100	6787000	5164500	3866300	5356100	2123400	KDELC2	3318	2931600	5584100	6787000	5164500	3866300	5356100	FALSE	FALSE	FALSE	FALSE	FALSE	FALSE	4866700	5356100	0.908627546	143888	KDELC2
A0A024R3C7;Q13315;B4DSP3	ATM	17	17	6.7	20	0	26.047	10744000	27776000	26562000	33984000	12267000	11144000	1722700	ATM	3475	10744000	27776000	26562000	33984000	12267000	11144000	FALSE	FALSE	FALSE	FALSE	FALSE	FALSE	22266600	11144000	1.998079684	472	ATM
B4DJX1;Q86YI5;A0A024R3D8;P10515;H0YDD4;E9PEJ4;B4DS43;B4DLQ2;Q01991	DLAT	11	12	24.9	42	0	57.062	67581000	61724000	66738000	94121000	58040000	64913000	44767000	DLAT	1047	67581000	61724000	66738000	94121000	58040000	64913000	FALSE	FALSE	FALSE	FALSE	FALSE	FALSE	69640800	64913000	1.072832869	1737	DLAT
A0A024R3E4;P46937-5;P46937-3;P46937-6;P46937-7;P46937-2;P46937-8;P46937;P46937-9;Q86T74;P46937-4;H0YCI3	YAP1;DKFZp451O0517	14	6	21.8	13	0	12.698	13421000	9563300	8972300	8667300	7912700	10104000	12984000	YAP1	1914	13421000	9563300	8972300	8667300	7912700	10104000	FALSE	FALSE	FALSE	FALSE	FALSE	FALSE	9707320	10104000	0.960740301	10413	YAP1
B4DXH3;B2R6Z9;B3KY32;A0A024R3H8;Q9H3H5-3;Q9H3H5-2;Q9H3H5	DPAGT1	7	2	5.8	5	0.00052165	3.68	1854000	2264600	2300500	0	2145200	1944700	3454100	DPAGT1	2984	1854000	2264600	2300500	1661376.88	2145200	1944700	FALSE	FALSE	FALSE	TRUE	FALSE	FALSE	2045135.376	1944700	1.051645691	1798	DPAGT1
B2R642;A0A024R3I5;P43121;A8K6A6;B3KXZ9;P43121-2	MCAM	6	16	35.1	33	0	71.31	0	107590000	12984000	12060000	20034000	27530000	20249000	MCAM	1590	5822115.555	107590000	12984000	12060000	20034000	27530000	TRUE	FALSE	FALSE	FALSE	FALSE	FALSE	31698023.11	27530000	1.151399314	4162	MCAM
A0A024R3J7;P46977;P46977-2	hCG_2032701;STT3A	7	14	20.3	78	0	50.647	61989000	103820000	65997000	65390000	80324000	123370000	45252000	hCG_2032701	1042	61989000	103820000	65997000	65390000	80324000	123370000	FALSE	FALSE	FALSE	FALSE	FALSE	FALSE	75504000	123370000	0.612012645	3703	STT3A
A0A024R3P9;Q9H3P7	ACBD3	2	8	20.5	13	0	26.059	13019000	8516200	10305000	11873000	13044000	11249000	10689000	ACBD3	2060	13019000	8516200	10305000	11873000	13044000	11249000	FALSE	FALSE	FALSE	FALSE	FALSE	FALSE	11351440	11249000	1.009106587	64746	ACBD3
A0A024R3R5;Q14739	LBR	5	9	17.6	23	0	29.765	17830000	6228600	15122000	15392000	11684000	16989000	11004000	LBR	2037	17830000	6228600	15122000	15392000	11684000	16989000	FALSE	FALSE	FALSE	FALSE	FALSE	FALSE	13251320	16989000	0.779994114	3930	LBR
A0A024R3T8;P09874;B4E0E1;B2R5W3	PARP1	9	46	47.1	235	0	296.74	803710000	163090000	400840000	357960000	395440000	228490000	136920000	PARP1	442	803710000	163090000	400840000	357960000	395440000	228490000	FALSE	FALSE	FALSE	FALSE	FALSE	FALSE	424208000	228490000	1.856571404	142	PARP1
A0A024R3U8;Q8WWC4;H7C0V0	FLJ22555;C2orf47	3	3	12	9	0	7.4356	0	5984800	4805800	5719900	0	5043900	3386900	FLJ22555	2997	2873510.686	5984800	4805800	5719900	1418015.479	5043900	TRUE	FALSE	FALSE	FALSE	TRUE	FALSE	4160405.233	5043900	0.82483896	79568	MAIP1
A0A024R3V4;Q9H2H8;B8ZZ77;A0A0S2Z5A8;H7BZ14;B4DN80;Q9H2H8-2;C9K058	PPIL3	12	4	34.8	6	0	8.4613	0	0	5827400	5081700	5926700	0	5686900	PPIL3	2587	1466919.434	1705439.893	5827400	5081700	5926700	1262423.846	TRUE	TRUE	FALSE	FALSE	FALSE	TRUE	4001631.865	1262423.846	3.169800601	53938	PPIL3
Q658J0;A0A024R3V5;A0A024R3V7;Q9GZT8-2;Q9GZT8;E7EXA3;Q6X734;Q9GZT8-3;B8ZZI0	DKFZp762L015;NIF3L1	10	4	19	16	0	13.245	12006000	8682800	11468000	14150000	12189000	9694100	10173000	DKFZp762L015	2104	12006000	8682800	11468000	14150000	12189000	9694100	FALSE	FALSE	FALSE	FALSE	FALSE	FALSE	11699160	9694100	1.206833022	60491	NIF3L1
A0A024R3V8;Q99598;C4P0D6;C4P0D8;Q5VVQ1;C4P0D4	TSNAX;DISC1	8	8	35.9	28	0	25.172	24160000	14736000	24417000	27340000	28841000	14539000	19337000	TSNAX	1626	24160000	14736000	24417000	27340000	28841000	14539000	FALSE	FALSE	FALSE	FALSE	FALSE	FALSE	23898800	14539000	1.643771924	7257	DISC1;TSNAX
A0A024R3W7;P24534;A4D1M6	EEF1B2;LOC392793	6	6	50.2	62	0	219.8	260910000	200290000	177140000	182410000	286610000	239590000	369910000	EEF1B2	176	260910000	200290000	177140000	182410000	286610000	239590000	FALSE	FALSE	FALSE	FALSE	FALSE	FALSE	221472000	239590000	0.924379148	1933	EEF1B2;LOC392793
A0A024R3X4;P10809;B3GQS7;B7Z597;B7Z4F6;B7Z5E7	HSPD1	19	28	78	305	0	323.31	1222500000	1006300000	1251800000	1202600000	1344100000	944310000	660650000	HSPD1	100	1222500000	1006300000	1251800000	1202600000	1344100000	944310000	FALSE	FALSE	FALSE	FALSE	FALSE	FALSE	1205460000	944310000	1.276551133	3329	HSPD1
A0A024R3Z2;B8ZZN6;P63165;B8ZZJ0;B9A032;G2XKQ0	SUMO1	8	3	34.7	12	0	16.215	20504000	0	17596000	0	0	35306000	55799000	SUMO1	897	20504000	2274813.814	17596000	2918686.432	2187481.188	35306000	FALSE	TRUE	FALSE	TRUE	TRUE	FALSE	9096196.287	35306000	0.257638823	7341	SUMO1
E9PHS0;Q6FHH6;Q53TN2;B2R602;A0A024R3Z5;O43813;F8WDS9;B4DGM7	LANCL1	8	7	41.8	22	0	19.021	17446000	29539000	24202000	24577000	23372000	28760000	43534000	LANCL1	1063	17446000	29539000	24202000	24577000	23372000	28760000	FALSE	FALSE	FALSE	FALSE	FALSE	FALSE	23827200	28760000	0.828484006	10314	LANCL1
A0A024R3Z6;Q53FN7;Q7L1Q6;Q7L1Q6-4;Q7L1Q6-3;D3DN77;Q7L1Q6-2;C9IZ80;B3KU41	BZW1;hCG_2022736	15	12	27.2	46	0	29.918	41305000	55356000	29128000	41339000	50990000	55409000	34113000	BZW1	1229	41305000	55356000	29128000	41339000	50990000	55409000	FALSE	FALSE	FALSE	FALSE	FALSE	FALSE	43623600	55409000	0.787301702	9689	BZW1
C9JG97;A0A024R410;C9JEH3;Q13685;H7C0R2;C9JTS3	AAMP	7	4	12	10	0	11.954	7998000	5743100	0	12699000	10644000	9592200	7307200	AAMP	2372	7998000	5743100	2330833.783	12699000	10644000	9592200	FALSE	FALSE	TRUE	FALSE	FALSE	FALSE	7882986.757	9592200	0.821812176	14	AAMP
A0A024R413;O43676;C9JKQ2	NDUFB3	3	2	21.4	11	0	6.3936	6924600	6855600	7267100	6995600	4405000	5186100	21209000	NDUFB3	1548	6924600	6855600	7267100	6995600	4405000	5186100	FALSE	FALSE	FALSE	FALSE	FALSE	FALSE	6489580	5186100	1.251341085	4709	NDUFB3
B3KMB8;A0A024R419;Q9NYY8-2;Q9NYY8	KIAA0971;FASTKD2	4	7	15.1	18	0	32.884	10864000	8334100	5340800	5314600	4990900	3689600	3245200	KIAA0971	3033	10864000	8334100	5340800	5314600	4990900	3689600	FALSE	FALSE	FALSE	FALSE	FALSE	FALSE	6968880	3689600	1.888790113	22868	FASTKD2;KIAA0971
A0A024R442;Q53SB6;E7ETB3;B7Z7F0;Q9ULA0;Q9HAC6;B9ZVU2;F8WAN0;B7Z822;Q9BSS9;E7EMB6;A0A024R443;Q9NV55;E7EPX3;C9JBE1	DNPEP	18	4	11.5	5	0	8.3928	4900900	7638300	0	5377500	5571600	5978100	3957600	DNPEP	2890	4900900	7638300	6512788.749	5377500	5571600	5978100	FALSE	FALSE	TRUE	FALSE	FALSE	FALSE	6000217.75	5978100	1.003699796	23549	DNPEP
B4DMR3;A0A024R498;A0A024R451;P07093-2;P07093;P07093-3;C9JN98	SERPINE2	7	7	27.5	15	0	18.843	2766000	13320000	14903000	12612000	20155000	15743000	8552300	SERPINE2	2243	2766000	13320000	14903000	12612000	20155000	15743000	FALSE	FALSE	FALSE	FALSE	FALSE	FALSE	12751200	15743000	0.809959982	5270	SERPINE2
Q53EX1;A8JZZ8;A0A024R467;Q9Y276;C9J1S9;Q53RT4;C9J8G3	BCS1L	13	7	18.1	9	0	11.506	0	4321400	7667900	6043200	5548500	5844300	3343200	BCS1L	3010	1262565.125	4321400	7667900	6043200	5548500	5844300	TRUE	FALSE	FALSE	FALSE	FALSE	FALSE	4968713.025	5844300	0.850181035	617	BCS1L
A0A024R473;Q9H9J2	MRPL44	2	7	26.5	18	0	26.846	15143000	9111000	15354000	17691000	17846000	14250000	13818000	MRPL44	1879	15143000	9111000	15354000	17691000	17846000	14250000	FALSE	FALSE	FALSE	FALSE	FALSE	FALSE	15029000	14250000	1.054666667	65080	MRPL44
Q53S54;A0A024R475;Q13618-2;Q13618;B7Z600;Q13618-3	CUL3	9	9	13.5	17	0	22.699	22315000	9155700	12973000	14913000	13182000	10039000	5517800	CUL3	2622	22315000	9155700	12973000	14913000	13182000	10039000	FALSE	FALSE	FALSE	FALSE	FALSE	FALSE	14507740	10039000	1.445137962	8452	CUL3
A0A024R482;Q96IJ6;Q96IJ6-2;F8WD54;A0A087WUI8	GMPPA	9	6	18.8	23	0	19.041	14275000	8865900	12573000	20204000	12915000	19057000	13997000	GMPPA	1867	14275000	8865900	12573000	20204000	12915000	19057000	FALSE	FALSE	FALSE	FALSE	FALSE	FALSE	13766580	19057000	0.722389673	29926	GMPPA
A0A024R486;A0A087X1I8;Q7Z3E5-2;Q7Z3E5	ARMC9	10	13	22.9	15	0	76.178	4232800	11666000	5072400	10309000	4911900	5677800	8506300	ARMC9	2249	4232800	11666000	5072400	10309000	4911900	5677800	FALSE	FALSE	FALSE	FALSE	FALSE	FALSE	7238420	5677800	1.274863503	80210	ARMC9
A0A024R488;Q8IWB7;Q9H8N9	WDFY1	4	12	34.1	42	0	41.291	33057000	52667000	42952000	54754000	52602000	26711000	33033000	WDFY1	1245	33057000	52667000	42952000	54754000	52602000	26711000	FALSE	FALSE	FALSE	FALSE	FALSE	FALSE	47206400	26711000	1.767301861	57590	WDFY1
Q7Z4X0;A0A024R496;Q9Y376;A0A087X0K1	CAB39	4	10	29	26	0	33.461	23506000	20558000	15694000	18869000	16765000	13825000	14375000	CAB39	1848	23506000	20558000	15694000	18869000	16765000	13825000	FALSE	FALSE	FALSE	FALSE	FALSE	FALSE	19078400	13825000	1.379992767	51719	CAB39
B2RBE0;A0A024R497;O95573;B3KN05;B3KMA6	ACSL3	9	23	45.8	111	0	209.79	172960000	215070000	134510000	120430000	100800000	46652000	80578000	ACSL3	682	172960000	215070000	134510000	120430000	100800000	46652000	FALSE	FALSE	FALSE	FALSE	FALSE	FALSE	148754000	46652000	3.188587842	2181	ACSL3
A0A024R4A0;P19338;B3KTP9;B3KM80;Q6ZS99;Q9BQ02;H7BY16	NCL	11	36	40.8	286	0	323.31	1457500000	1399200000	1253800000	1539100000	1518200000	961480000	666560000	NCL	98	1457500000	1399200000	1253800000	1539100000	1518200000	961480000	FALSE	FALSE	FALSE	FALSE	FALSE	FALSE	1433560000	961480000	1.490993052	4691	NCL
Q7Z518;A0A087WXC5;A0A024R4B3;E7ESZ7;O95299;Q53SW4;A8K413;O95299-2	NDUFA10	15	7	22.9	16	0	39.052	11809000	15292000	26318000	31947000	10662000	9743000	21537000	NDUFA10	1542	11809000	15292000	26318000	31947000	10662000	9743000	FALSE	FALSE	FALSE	FALSE	FALSE	FALSE	19205600	9743000	1.971220363	4705	NDUFA10
E9PGT6;B2R8N1;A0A024R4D1;Q99627-2;Q99627;H7C3S9	COPS8	7	3	24.3	11	0	13.183	8554100	12704000	8377400	9060700	6682800	8817100	23231000	COPS8	1491	8554100	12704000	8377400	9060700	6682800	8817100	FALSE	FALSE	FALSE	FALSE	FALSE	FALSE	9075800	8817100	1.029340713	10920	COPS8
A0A0A0N0L3;A0A024R4E2;Q13148;A0A087WX29;B1AKP7;G3V162;A0A087X260;A0A087WYY0;K7EJM5;A0A0A0N0N3;A0A0A0N0M3;K7EN94;B4DRW3;A0A087WXQ5;A0A087WV68	TDP43;TARDBP	25	10	37.1	63	0	144.13	54228000	49576000	72664000	78114000	69454000	85198000	81730000	TDP43	675	54228000	49576000	72664000	78114000	69454000	85198000	FALSE	FALSE	FALSE	FALSE	FALSE	FALSE	64807200	85198000	0.760665743	23435	TARDBP;TDP43
B0AZM0;Q6FG44;Q6FG22;B2R776;B2R615;A0A024R4E3;Q13303-4;Q13303-2;Q13303;Q13303-3;A8K1X9;Q13303-5;Q5TG80	KCNAB2	27	7	27.5	19	0	34.674	34890000	27430000	8891200	20719000	19442000	0	17733000	KCNAB2	1685	34890000	27430000	8891200	20719000	19442000	1678008.551	FALSE	FALSE	FALSE	FALSE	FALSE	TRUE	22274440	1678008.551	13.27433045	8514	KCNAB2
A0A024R4E5;B2R5V9;Q00341;Q00341-2;H0Y394;B4DKR8;Q6ZS03	HDLBP	31	34	32.3	133	0	164.07	129770000	69366000	144150000	180880000	219580000	1.79E+08	36191000	HDLBP	1188	129770000	69366000	144150000	180880000	219580000	1.79E+08	FALSE	FALSE	FALSE	FALSE	FALSE	FALSE	148749200	1.79E+08	0.831001117	3069	HDLBP
A0A024R4E7;O96011;O96011-2;B3KSS3	PEX11B	5	5	19.7	5	0	6.0336	4257800	9776100	0	0	0	3233900	5488400	PEX11B	2628	4257800	9776100	3235546.723	1434696.432	2829645.557	3233900	FALSE	FALSE	TRUE	TRUE	TRUE	FALSE	4306757.742	3233900	1.331753531	8799	PEX11B
A0A024R4F1;P06733;E2DRY6;P06733-2	ENO1	7	14	74.2	284	0	323.31	1712100000	1679800000	2394800000	2376700000	1946100000	2179500000	1.62E+09	ENO1	19	1712100000	1679800000	2394800000	2376700000	1946100000	2179500000	FALSE	FALSE	FALSE	FALSE	FALSE	FALSE	2021900000	2179500000	0.927689837	2023	ENO1
A0A024R4F4;M0R2B7;P28340;Q308M6;M0QZR8;Q59FA0	POLD1	10	7	8.1	8	0	10.269	5796900	4934600	5614800	5942500	6024800	8947600	1785000	POLD1	3448	5796900	4934600	5614800	5942500	6024800	8947600	FALSE	FALSE	FALSE	FALSE	FALSE	FALSE	5662720	8947600	0.632875855	5424	POLD1
A0A024R4G1;Q8N1G4	LRRC47	2	15	31.2	68	0	62.828	61236000	55179000	54378000	53606000	40356000	44081000	35083000	LRRC47	1211	61236000	55179000	54378000	53606000	40356000	44081000	FALSE	FALSE	FALSE	FALSE	FALSE	FALSE	52951000	44081000	1.20122048	57470	LRRC47
B4DGN8;A0A024R4H0;Q02809;Q02809-2;B2R5M9	PLOD1	8	19	33.3	91	0	143.35	45891000	49101000	157130000	153130000	224260000	99851000	32560000	PLOD1	1259	45891000	49101000	157130000	153130000	224260000	99851000	FALSE	FALSE	FALSE	FALSE	FALSE	FALSE	125902400	99851000	1.260902745	5351	PLOD1
A0A024R4I7;Q8WZA0;Q8WZA0-2;K7ES95	LZIC	4	4	34.7	10	0	9.4729	9826200	13581000	10980000	13870000	13590000	6391800	18542000	LZIC	1664	9826200	13581000	10980000	13870000	13590000	6391800	FALSE	FALSE	FALSE	FALSE	FALSE	FALSE	12369440	6391800	1.935204481	84328	LZIC
Q75MT9;Q6FHZ0;A0A024R4K3;P40926;Q0QF37;P40926-2;G3XAL0;B3KTM1	MDH2	8	19	72.5	221	0	323.31	1184500000	1121700000	968190000	901760000	805680000	668440000	991690000	MDH2	47	1184500000	1121700000	968190000	901760000	805680000	668440000	FALSE	FALSE	FALSE	FALSE	FALSE	FALSE	996366000	668440000	1.490584046	4191	MDH2
A0A024R4M0;P46781;B5MCT8;C9JM19;B7Z732;A5D904	RPS9	8	17	58.8	115	0	110.39	580830000	519170000	607120000	671770000	651330000	557960000	901480000	RPS9	55	580830000	519170000	607120000	671770000	651330000	557960000	FALSE	FALSE	FALSE	FALSE	FALSE	FALSE	606044000	557960000	1.086178221	6203	RPS9
A0A024R4M8;Q8NBN7;G8JLA1;B3KVA3;A8K6B4;B2RDH1;Q8NBN7-2	RDH13	8	6	18.7	11	0	13.982	5803600	4334900	0	0	0	5902700	5217100	RDH13	2669	5803600	4334900	1662086.482	2205655.426	2549097.108	5902700	FALSE	FALSE	TRUE	TRUE	TRUE	FALSE	3311067.803	5902700	0.560941231	112724	RDH13
M0R0F0;A0A024R4Q8;P46782;Q53G25;M0R0R2;M0QZN2	RPS5	7	11	55.5	87	0	239.11	431160000	461120000	355690000	445860000	473930000	322800000	714080000	RPS5	88	431160000	461120000	355690000	445860000	473930000	322800000	FALSE	FALSE	FALSE	FALSE	FALSE	FALSE	433552000	322800000	1.343097893	6193	RPS5
A0A024R4S0;M0R1T5;O43633;M0R1L7	CHMP2A	4	5	23.4	7	0	10.339	9794200	8814300	0	0	0	9263800	16339000	CHMP2A	1747	9794200	8814300	1432538.676	2847365.315	3396482.379	9263800	FALSE	FALSE	TRUE	TRUE	TRUE	FALSE	5256977.274	9263800	0.567475256	27243	CHMP2A
A0A024R4S1;Q9Y6I3-3;Q9Y6I3;Q9Y6I3-1;B4DU91	EPN1	7	5	12	8	0	20.519	0	3970800	0	0	3520000	6779700	6629000	EPN1	2449	1826528.319	3970800	2065329.031	2567174.459	3520000	6779700	TRUE	FALSE	TRUE	TRUE	FALSE	FALSE	2789966.362	6779700	0.411517672	29924	EPN1
A0A024R4T4;P61081	UBE2M	4	7	41.5	31	0	75.228	56395000	69167000	41330000	55626000	45767000	75747000	126100000	UBE2M	467	56395000	69167000	41330000	55626000	45767000	75747000	FALSE	FALSE	FALSE	FALSE	FALSE	FALSE	53657000	75747000	0.708371289	9040	UBE2M
A0A024R4U3;Q14166	TTLL12	4	16	34.2	56	0	53.344	63847000	61623000	49828000	53340000	41624000	33968000	26618000	TTLL12	1405	63847000	61623000	49828000	53340000	41624000	33968000	FALSE	FALSE	FALSE	FALSE	FALSE	FALSE	54052400	33968000	1.59127414	23170	TTLL12
A0A024R4X0;P00387-2;P00387;P00387-3;Q6ZVI6;B1AHF3	CYB5R3	7	13	57.4	92	0	302.01	150150000	221520000	129730000	126940000	118090000	193020000	215990000	CYB5R3	287	150150000	221520000	129730000	126940000	118090000	193020000	FALSE	FALSE	FALSE	FALSE	FALSE	FALSE	149286000	193020000	0.773422443	1727	CYB5R3
A0A024R4X7;Q9UKX7-2;Q9UKX7	hCG_1989366;NUP50	5	14	42.9	25	0	73.923	17931000	51781000	13546000	19367000	28262000	16381000	19192000	hCG_1989366	1634	17931000	51781000	13546000	19367000	28262000	16381000	FALSE	FALSE	FALSE	FALSE	FALSE	FALSE	26177400	16381000	1.598034308	10762	NUP50
A0A024R4Z6;Q08945	SSRP1	6	19	30.7	79	0	140.67	68832000	83945000	88046000	92909000	81901000	120760000	48626000	SSRP1	985	68832000	83945000	88046000	92909000	81901000	120760000	FALSE	FALSE	FALSE	FALSE	FALSE	FALSE	83126600	120760000	0.68836204	6749	SSRP1
A0A024R529;H0YCY6;A0A140VJH7;A0A087WUL0;Q3LXA3-2;Q3LXA3;I3L252	DAK;TKFC	11	6	15.8	8	0	22.318	5625400	2993700	10946000	16835000	0	2840500	4690500	DAK	2752	5625400	2993700	10946000	16835000	2349646.239	2840500	FALSE	FALSE	FALSE	FALSE	TRUE	FALSE	7749949.248	2840500	2.728375021	26007	TKFC;DAK
A0A024R534;O94776;O94776-2	MTA2	5	13	25.4	40	0	35.595	33235000	31651000	28676000	38705000	32233000	32398000	14789000	MTA2	1828	33235000	31651000	28676000	38705000	32233000	32398000	FALSE	FALSE	FALSE	FALSE	FALSE	FALSE	32900000	32398000	1.015494784	9219	MTA2
E9PJ81;A0A024R598;A0A024R539;Q04323;Q04323-2;E9PRQ7;B4E0P8;A0A087WTZ5;B4DNC6;Q05BV2	UBXN1;LOC51035	12	9	40	25	0	77.362	20707000	22590000	14751000	23336000	21572000	19146000	34090000	UBXN1	1230	20707000	22590000	14751000	23336000	21572000	19146000	FALSE	FALSE	FALSE	FALSE	FALSE	FALSE	20591200	19146000	1.07548313	51035	UBXN1;LOC51035
A0A024R542;Q9C0C2	TNKS1BP1	6	13	10.1	15	0	23.031	7033100	8325400	10226000	3687700	5188000	35879000	2720700	TNKS1BP1	3153	7033100	8325400	10226000	3687700	5188000	35879000	FALSE	FALSE	FALSE	FALSE	FALSE	FALSE	6892040	35879000	0.192091195	85456	TNKS1BP1
A0A024R563;Q96C90;F5GXC4;F5H2U0;B5MC51;P53671-3	PPP1R14B;LIMK2	6	2	22.6	3	0	5.597	5304000	5868300	0	6124600	7147900	0	15490000	PPP1R14B	1794	5304000	5868300	2056759.526	6124600	7147900	1910447.008	FALSE	FALSE	TRUE	FALSE	FALSE	TRUE	5300311.905	1910447.008	2.774383106	26472	PPP1R14B;LIMK2
F5GX77;A0A024R565;Q9UI30;Q9UI30-2	TRMT112;HSPC152	5	5	56.6	28	0	37.507	58391000	59516000	57903000	73865000	80220000	45713000	111960000	TRMT112	514	58391000	59516000	57903000	73865000	80220000	45713000	FALSE	FALSE	FALSE	FALSE	FALSE	FALSE	65979000	45713000	1.443331219	51504	TRMT112;HSPC152
A0A024R588;A0A024R566;B4DJU4;A0A024R5D9;A0A024R572;Q15637-4;Q15637-6;Q15637-3;Q15637-2;Q15637;Q15637-5;Q15637-7;B4DSE4;B4DX42	SF1	18	10	22.6	56	0	74.28	48772000	51661000	58929000	62969000	44488000	54882000	64866000	SF1	811	48772000	51661000	58929000	62969000	44488000	54882000	FALSE	FALSE	FALSE	FALSE	FALSE	FALSE	53363800	54882000	0.972337014	7536	SF1
B2R5U3;A0A024R571;Q9H4M9;B4DMV9;B4DR44;B4DTR4;B4DZH9;C9JC03;C9J2Z4	EHD1	12	16	53.2	57	0	115.78	26204000	32611000	39907000	42712000	33900000	98908000	31342000	EHD1	1279	26204000	32611000	39907000	42712000	33900000	98908000	FALSE	FALSE	FALSE	FALSE	FALSE	FALSE	35066800	98908000	0.354539572	10938	EHD1
A0A024R578;Q13405;H0YDP7;Q59GE9	MRPL49	6	4	28.3	14	0	24.169	15215000	11365000	11646000	9382800	9078100	6917300	18944000	MRPL49	1644	15215000	11365000	11646000	9382800	9078100	6917300	FALSE	FALSE	FALSE	FALSE	FALSE	FALSE	11337380	6917300	1.638989201	740	MRPL49
H0YEF3;A0A024R5B3;E9PN81;Q8TDP1-2;Q8TDP1;E9PKP0;H0YE52;H0YCP5;B4DMW4	RNASEH2C;AYP1	9	4	29.1	5	0	8.7783	0	6941600	5165800	6801400	4998700	4458500	9711200	RNASEH2C	2148	1818878.739	6941600	5165800	6801400	4998700	4458500	TRUE	FALSE	FALSE	FALSE	FALSE	FALSE	5145275.748	4458500	1.1540374	84153	RNASEH2C;AYP1
A0A024R5C4;O95197-3;B7Z4M1;B7Z361;B7Z3E3;B7Z8W8;O95197-6;O95197-5;O95197-4;O95197-7;O95197-2;O95197	RTN3	12	2	11	21	0	9.2784	44874000	38419000	20910000	30696000	34230000	90750000	138570000	RTN3	435	44874000	38419000	20910000	30696000	34230000	90750000	FALSE	FALSE	FALSE	FALSE	FALSE	FALSE	33825800	90750000	0.372736088	10313	RTN3
A0A024R5C5;P11498	PC	5	6	5.9	9	0	19.891	9065500	4977300	0	4953300	4760600	0	1620200	PC	3519	9065500	4977300	1960620.48	4953300	4760600	5637996.176	FALSE	FALSE	TRUE	FALSE	FALSE	TRUE	5143464.096	5637996.176	0.912285843	5091	PC
A0A024R5E5;Q13488;Q64F87;E9PM12	TCIRG1	9	3	3.6	3	0	4.6949	3032900	2058400	0	0	0	2996200	1212600	TCIRG1	3697	3032900	2058400	2601804.514	3412830.592	2986633.977	2996200	FALSE	FALSE	TRUE	TRUE	TRUE	FALSE	2818513.817	2996200	0.940696154	10312	TCIRG1
B2RAQ8;A0A024R5F4;P50416;P50416-2	CPT1A	8	17	24.7	50	0	54.454	7771400	13065000	17938000	23074000	36578000	29611000	11511000	CPT1A	2004	7771400	13065000	17938000	23074000	36578000	29611000	FALSE	FALSE	FALSE	FALSE	FALSE	FALSE	19685280	29611000	0.664796191	1374	CPT1A
A8K0D2;A0A024R5F7;Q9UBM7;E9PM00;X5DRD7;X5DNI9;E9PJ54;X5D9E1;A0A0S2Z3S3;B4E1K5	DHCR7	16	4	10.7	17	0	22.246	40789000	23647000	41500000	47214000	23940000	19791000	61378000	DHCR7	837	40789000	23647000	41500000	47214000	23940000	19791000	FALSE	FALSE	FALSE	FALSE	FALSE	FALSE	35418000	19791000	1.789601334	1717	DHCR7
A0A024R5H0;O75531;B2R4V4	BANF1	3	5	58.4	37	0	32.357	84211000	97891000	69977000	91482000	68281000	149460000	404740000	BANF1	166	84211000	97891000	69977000	91482000	68281000	149460000	FALSE	FALSE	FALSE	FALSE	FALSE	FALSE	82368400	149460000	0.551106651	8815	BANF1
Q6FGX3;A0A024R5J5;A0A024R5H8;P20340-2;P20340;Q53ET8;P20340-4;B7Z5Z9	RAB6A	18	2	34.6	8	0	60.13	14062000	13879000	13826000	15015000	0	7799100	18414000	RAB6A	1668	14062000	13879000	13826000	15015000	3831300.888	7799100	FALSE	FALSE	FALSE	FALSE	TRUE	FALSE	12122660.18	7799100	1.554366552	5870	RAB6A
A0A024R5K1;Q9BR76;Q9NSK3	CORO1B;DKFZp762I166	11	14	33.9	53	0	33.743	67579000	61326000	44035000	67762000	43093000	39335000	57273000	CORO1B	880	67579000	61326000	44035000	67762000	43093000	39335000	FALSE	FALSE	FALSE	FALSE	FALSE	FALSE	56759000	39335000	1.442964281	57175	CORO1B;DKFZp762I166
A0A024R5K3;E9PPW7;O00217;E9PKH6;Q53G17;E9PN51;F8W9K7;B4DYI3	NDUFS8	8	6	39.5	24	0	53.29	14887000	17671000	22617000	21183000	13849000	14663000	26808000	NDUFS8	1397	14887000	17671000	22617000	21183000	13849000	14663000	FALSE	FALSE	FALSE	FALSE	FALSE	FALSE	18041400	14663000	1.230403055	4728	NDUFS8
A0A024R5K6;O95298;E9PM14;A0A087WUM3;O95298-2;E9PQ53	NDUFC2;KCTD14;NDUFC2-KCTD14	11	5	37.8	13	0	11.366	13917000	19363000	22928000	16651000	12799000	12140000	45382000	NDUFC2	1041	13917000	19363000	22928000	16651000	12799000	12140000	FALSE	FALSE	FALSE	FALSE	FALSE	FALSE	17131600	12140000	1.411169687	4718	NDUFC2;NDUFC2-KCTD14
A0A024R5K8;P50454;B4DN87;A8K259;E9PPV6;E9PR70;E9PK86;E9PMI5;E9PKH2	SERPINH1	17	22	59.8	165	0	323.31	128650000	71974000	340560000	283090000	488920000	691400000	229630000	SERPINH1	270	128650000	71974000	340560000	283090000	488920000	691400000	FALSE	FALSE	FALSE	FALSE	FALSE	FALSE	262638800	691400000	0.379865201	871	SERPINH1
B7Z7Q6;A0A024R5L0;P42785;P42785-2;E9PIG4;E9PQB5;E9PL85;E9PQN3;E9PKN6	PRCP	15	6	18.9	16	0	27.26	18353000	12122000	20470000	14393000	10340000	24284000	17484000	PRCP	1698	18353000	12122000	20470000	14393000	10340000	24284000	FALSE	FALSE	FALSE	FALSE	FALSE	FALSE	15135600	24284000	0.623274584	5547	PRCP
B5BU72;A0A024R5L7;A8K5U9;A0A024R5P1;Q13492-3;Q13492-2;Q13492-5;Q13492;Q13492-4	PICALM	27	10	27.4	42	0	118.94	36552000	35530000	30481000	28871000	31626000	63120000	29917000	PICALM	1304	36552000	35530000	30481000	28871000	31626000	63120000	FALSE	FALSE	FALSE	FALSE	FALSE	FALSE	32612000	63120000	0.516666667	8301	PICALM
A0A024R5M9;Q4LE64;Q14980-2;Q14980;A0A087WY61;Q14980-4;Q14980-3;A0A024R5G4;Q59HB8;Q7Z757	NUMA1;NUMA1 variant protein	35	54	33.8	178	0	307.59	137490000	89611000	118630000	128650000	97887000	187640000	19276000	NUMA1	1630	137490000	89611000	118630000	128650000	97887000	187640000	FALSE	FALSE	FALSE	FALSE	FALSE	FALSE	114453600	187640000	0.60996376	4926	NUMA1
A0A024R5Q1;Q9NX55;J3QT56;Q9NX55-3	hCG_2003792;HYPK	4	4	39.5	12	0	19.918	11065000	17396000	8644900	7331400	6175600	5915500	38662000	hCG_2003792	1144	11065000	17396000	8644900	7331400	6175600	5915500	FALSE	FALSE	FALSE	FALSE	FALSE	FALSE	10122580	5915500	1.71119601	25764	HYPK
A0A024R5Q7;P30520;B4E1L0	ADSS	3	17	46.1	67	0	118.81	179100000	114270000	73003000	75624000	92218000	33623000	83545000	ADSS	661	179100000	114270000	73003000	75624000	92218000	33623000	FALSE	FALSE	FALSE	FALSE	FALSE	FALSE	106843000	33623000	3.177675996	159	ADSS
A0A024R5S5;O75822;O75822-3;O75822-2;H0YGJ7	EIF3S1;EIF3J	6	6	23.3	18	0	31.634	15319000	24270000	18620000	18647000	22222000	18365000	20689000	EIF3S1	1573	15319000	24270000	18620000	18647000	22222000	18365000	FALSE	FALSE	FALSE	FALSE	FALSE	FALSE	19815600	18365000	1.078987204	8669	EIF3J;EIF3S1
A0A024R5U5;O14672;A0AV88;O14672-2	ADAM10	8	7	11.8	15	0	27.964	0	7596700	7481900	7574300	9214600	3935300	2656300	ADAM10	3173	1733080.883	7596700	7481900	7574300	9214600	3935300	TRUE	FALSE	FALSE	FALSE	FALSE	FALSE	6720116.177	3935300	1.707650288	102	ADAM10
A0A024R5X7;O76031;Q9H072	CLPX;DKFZp586J151	4	10	18.6	15	0	22.091	15141000	12117000	17190000	16126000	20011000	9262500	5583800	CLPX	2609	15141000	12117000	17190000	16126000	20011000	9262500	FALSE	FALSE	FALSE	FALSE	FALSE	FALSE	16117000	9262500	1.740026991	10845	CLPX;DKFZp586J151
V9HW65;A0A024R5Z7;P07355;P07355-2;H0YN42;H0YMD0;H0YMU9;A6NMY6;H0YM50;H0YKS4;H0YNP5;B3KRQ1;B4DNH8;H0YN28;H0YL33	HEL-S-270;ANXA2;ANXA2P2	29	31	72.6	364	0	323.31	705240000	3.70E+09	1963900000	1.49E+09	2410700000	4760800000	2250700000	HEL-S-270	12	705240000	3.70E+09	1963900000	1.49E+09	2410700000	4760800000	FALSE	FALSE	FALSE	FALSE	FALSE	FALSE	2053568000	4760800000	0.431349353	302	ANXA2;ANXA2P2
A0A024R5Z9;P14618-2;B4DRT3;H3BTN5;Q504U3;H3BR70;A0A024R609;H3BQ34	PKM2;PKM	19	3	76.1	18	0	36.472	8735400	18724000	10826000	7537800	9522300	33370000	11760000	PKM2	1981	8735400	18724000	10826000	7537800	9522300	33370000	FALSE	FALSE	FALSE	FALSE	FALSE	FALSE	11069100	33370000	0.331708121	NA	PKM2;PKM
Q7Z612;Q6ICQ4;A0A024R608;P05386	RPLP1	4	1	52.2	17	0	33.902	38674000	43226000	13539000	14368000	0	22318000	184730000	Q7Z612	329	38674000	43226000	13539000	14368000	1791575.606	22318000	FALSE	FALSE	FALSE	FALSE	TRUE	FALSE	22319715.12	22318000	1.000076849	6176	RPLP1
A0A024R648;Q9Y5J7;G3V2F3;G3V502	TIMM9	4	4	56.2	28	0	18.263	29597000	25500000	38135000	39622000	25804000	34709000	83533000	TIMM9	662	29597000	25500000	38135000	39622000	25804000	34709000	FALSE	FALSE	FALSE	FALSE	FALSE	FALSE	31731600	34709000	0.914218214	26520	TIMM9
A0A024R663;Q86UP2-2;Q86UP2-3;Q86UP2-4;Q86UP2	KTN1	12	38	32.7	103	0	173.33	146380000	137890000	122490000	84150000	88793000	84312000	29512000	KTN1	1319	146380000	137890000	122490000	84150000	88793000	84312000	FALSE	FALSE	FALSE	FALSE	FALSE	FALSE	115940600	84312000	1.375137584	3895	KTN1
A0A024R670;A0A087X1F5;A0A087WYV9;A0A087WUM0;P57105	SYNJ2BP;SYNJ2BP-COX16	5	3	21.4	15	0	8.9425	7793000	7523800	8436300	10451000	6708200	6165800	19294000	SYNJ2BP	1628	7793000	7523800	8436300	10451000	6708200	6165800	FALSE	FALSE	FALSE	FALSE	FALSE	FALSE	8182460	6165800	1.327071913	55333	SYNJ2BP;SYNJ2BP-COX16
G3V2S6;Q9H3H0;A0A024R683;Q9Y5K8;H0YJH8;Q8N5Z9;Q6PJ05;H0YJS0;G3V2V6;G3V559	ATP6V1D;VATD	12	4	34.9	10	0	15.134	10951000	13081000	11926000	10665000	12029000	8955000	19638000	ATP6V1D	1616	10951000	13081000	11926000	10665000	12029000	8955000	FALSE	FALSE	FALSE	FALSE	FALSE	FALSE	11730400	8955000	1.309927415	51382	ATP6V1D;VATD
A0A024R694;P12814;P12814-3;P12814-2;P12814-4;Q86TX4;B4DFY0	ACTN1	35	6	72.2	59	0	323.31	38275000	85528000	110630000	73354000	89905000	159060000	28955000	A0A024R694	1335	38275000	85528000	110630000	73354000	89905000	159060000	FALSE	FALSE	FALSE	FALSE	FALSE	FALSE	79538400	159060000	0.50005281	87	ACTN1
J3KMY5;Q53HV6;A0A024R6C0;G3V3E8;E7EMS2;B4DV10;G3V3D1;P61916;G3V2V8;B2R4S5;H0YIZ1;P61916-2	NPC2	12	7	50	24	0	19.458	125360000	68103000	59753000	39243000	32414000	156530000	156040000	NPC2	387	125360000	68103000	59753000	39243000	32414000	156530000	FALSE	FALSE	FALSE	FALSE	FALSE	FALSE	64974600	156530000	0.415093592	10577	NPC2
A0A024R6C9;P36957;Q6IBS5;P36957-2;Q86TQ8;Q86TW7;Q86SW4	DLST	13	9	22.5	57	0	83.247	66793000	65586000	131320000	87711000	82651000	102200000	68711000	DLST	775	66793000	65586000	131320000	87711000	82651000	102200000	FALSE	FALSE	FALSE	FALSE	FALSE	FALSE	86812200	102200000	0.849434442	1743	DLST
A0A024R6D4;P84090;G3V279	ERH	3	5	74	22	0	289.15	36652000	33683000	40634000	33223000	41492000	44406000	1.43E+08	ERH	420	36652000	33683000	40634000	33223000	41492000	44406000	FALSE	FALSE	FALSE	FALSE	FALSE	FALSE	37136800	44406000	0.836301401	2079	ERH
A0A024R6D8;Q13243-3;Q13243;Q59EK7;B4DJK0;B4DUA4	SFRS5;SRSF5	10	5	23.5	19	0	15.617	17373000	13586000	17228000	20478000	15309000	16153000	39374000	SFRS5	1130	17373000	13586000	17228000	20478000	15309000	16153000	FALSE	FALSE	FALSE	FALSE	FALSE	FALSE	16794800	16153000	1.039732557	6430	SRSF5;SFRS5
G3V5I6;A0A024R6F2;G3V256;H0YJA2;Q6PJT7-10;Q6PJT7-4;Q6PJT7-3;Q6PJT7-11;Q6PJT7-5;Q6PJT7-9;Q6PJT7-2;Q6PJT7;A0A087WTC9	ZC3H14;FLJ11806	19	4	9.3	7	0	7.4812	8470800	4922500	4596100	3772700	4091000	4420900	3995700	ZC3H14	2882	8470800	4922500	4596100	3772700	4091000	4420900	FALSE	FALSE	FALSE	FALSE	FALSE	FALSE	5170620	4420900	1.169585379	79882	ZC3H14;FLJ11806
A0A024R6G6;O75438	NDUFB1	4	3	34.5	15	0	8.5848	0	0	9523400	7638700	0	7438100	39010000	NDUFB1	1136	2305961.887	1384466.063	9523400	7638700	1389751.52	7438100	TRUE	TRUE	FALSE	FALSE	TRUE	FALSE	4448455.894	7438100	0.59806347	4707	NDUFB1
A0A024R6I3;Q53GF9;P49755;B4DZH3	TMED10	6	7	35.2	60	0	131.45	107160000	133750000	84067000	100690000	109700000	109440000	153060000	TMED10	397	107160000	133750000	84067000	100690000	109700000	109440000	FALSE	FALSE	FALSE	FALSE	FALSE	FALSE	107073400	109440000	0.978375365	10972	TMED10
A0A024R6K3;Q86TU7;Q6NXR6;Q86TU7-3;Q86TU7-2	SETD3	6	5	9.4	10	0	9.9487	0	28692000	29725000	30247000	28330000	26571000	7253200	SETD3	2378	1409430.424	28692000	29725000	30247000	28330000	26571000	TRUE	FALSE	FALSE	FALSE	FALSE	FALSE	23680686.08	26571000	0.891222991	84193	SETD3
A0A024R6K8;P23381;P23381-2	WARS	26	21	57.1	91	0	191.04	176420000	261820000	165140000	113450000	110830000	160320000	152780000	WARS	399	176420000	261820000	165140000	113450000	110830000	160320000	FALSE	FALSE	FALSE	FALSE	FALSE	FALSE	165532000	160320000	1.03250998	7453	WARS
A0A024R6M2;Q6IN85-4;Q6IN85-2;Q6IN85;Q8N6W1;G3V5Z3	KIAA2010;SMEK1	6	2	2.4	4	0	4.9303	4485400	2775800	2083900	0	0	2089500	1140800	KIAA2010	3721	4485400	2775800	2083900	2367831.098	2456373.507	2089500	FALSE	FALSE	FALSE	TRUE	TRUE	FALSE	2833860.921	2089500	1.356238775	55671	KIAA2010;PPP4R3A
G3XAH6;B4DHB8;A0A024R6M3;B4DYF4;P51003-2;P51003;G3V3I9;H0YJ00;A0A0C4DGK1;A4D1Z6;A0ZTA0;Q9NRJ5	PAPOLA;PAPOLB;TPAP	20	3	4.7	7	0	4.5645	2866900	3547400	5414600	3824800	0	2917600	1491600	PAPOLA	3569	2866900	3547400	5414600	3824800	2176802.601	2917600	FALSE	FALSE	FALSE	FALSE	TRUE	FALSE	3566100.52	2917600	1.222271909	10914	PAPOLA;PAPOLB;TPAP
A0A024R6N2;Q9Y5S2;H0YLY0	CDC42BPB	4	3	2	6	0	5.5715	4578600	5821700	0	0	11014000	13337000	1570800	CDC42BPB	3536	4578600	5821700	1597541.987	3004056.483	11014000	13337000	FALSE	FALSE	TRUE	TRUE	FALSE	FALSE	5203179.694	13337000	0.390131191	9578	CDC42BPB
A0A024R6N3;A0A0A0MTQ5;G3V556;P56378;P56378-2	C14orf2;MP68	5	1	16	10	0.002947	2.9521	8824700	9450400	0	0	0	14641000	40229000	C14orf2	1122	8824700	9450400	2813453.171	3846083.95	1908733.908	14641000	FALSE	FALSE	TRUE	TRUE	TRUE	FALSE	5368674.206	14641000	0.366687672	9556	C14orf2;MP68
A0A024R6Q1;P55010;Q6IBU0;H0YLZ1;Q32Q19;Q05DF3;H0YN40	EIF5	12	14	37.8	75	0	81.121	88798000	115210000	88313000	98365000	107900000	64925000	73376000	EIF5	735	88798000	115210000	88313000	98365000	107900000	64925000	FALSE	FALSE	FALSE	FALSE	FALSE	FALSE	99717200	64925000	1.535882942	1983	EIF5
A0A024R6S1;O60884	DNAJA2	6	11	31.6	35	0	38.176	35567000	40316000	33937000	47634000	49524000	34051000	33485000	DNAJA2	1237	35567000	40316000	33937000	47634000	49524000	34051000	FALSE	FALSE	FALSE	FALSE	FALSE	FALSE	41395600	34051000	1.215694106	10294	DNAJA2
B3KQV4;B3KQN7;A0A0S2Z517;A0A024R6U7;Q9Y653-2;Q9Y653-3;Q9Y653;B4DM06;Q9Y653-5;H3BNH4;H3BV52;H3BRH0;Q9Y653-4	GPR56;ADGRG1	45	6	11.9	13	0	13.266	0	12755000	12289000	22098000	20688000	0	3442700	GPR56	2987	2495373.84	12755000	12289000	22098000	20688000	2698651.73	TRUE	FALSE	FALSE	FALSE	FALSE	TRUE	14065074.77	2698651.73	5.211889557	9289	ADGRG1;GPR56
B2R6U8;A0A024R6W2;O43809;H3BND3;H3BV41	NUDT21	6	10	42.7	67	0	72.06	41044000	49346000	53017000	62798000	60649000	72629000	73803000	NUDT21	732	41044000	49346000	53017000	62798000	60649000	72629000	FALSE	FALSE	FALSE	FALSE	FALSE	FALSE	53370800	72629000	0.734841455	11051	NUDT21
A0A024R6Y2;P61970;H3BRV9	NUTF2	3	5	56.7	35	0	109.67	34468000	39664000	46863000	46894000	62429000	64591000	145300000	NUTF2	414	34468000	39664000	46863000	46894000	62429000	64591000	FALSE	FALSE	FALSE	FALSE	FALSE	FALSE	46063600	64591000	0.71315818	10204	NUTF2
A0A024R6Z0;O43237;O43237-2;B4DHD8	DYNC1LI2	9	9	23.2	27	0	39.956	19282000	31088000	30039000	23947000	22863000	20362000	18936000	DYNC1LI2	1647	19282000	31088000	30039000	23947000	22863000	20362000	FALSE	FALSE	FALSE	FALSE	FALSE	FALSE	25443800	20362000	1.249572734	1783	DYNC1LI2
A0A024R704;P78362;P78362-2	SRPK2	17	6	14.1	8	0	17.456	11065000	8465000	5849200	7318000	6626900	3225500	3711900	SRPK2	2936	11065000	8465000	5849200	7318000	6626900	3225500	FALSE	FALSE	FALSE	FALSE	FALSE	FALSE	7864820	3225500	2.438325841	6733	SRPK2
A0A024R705;Q9UN37;I3L4J1;Q9NXK5;Q9UF30	VPS4A;DKFZp434E0418	6	6	22.9	7	0	8.5771	0	0	8477700	5462100	5827200	0	4773900	VPS4A	2732	1214667.685	2463353.859	8477700	5462100	5827200	1338032.579	TRUE	TRUE	FALSE	FALSE	FALSE	TRUE	4689004.309	1338032.579	3.504402197	27183	DKFZp434E0418;VPS4A
B4DFL1;A0A024R713;P09622;E9PEX6;B4DMK9;P09622-3;P09622-2	DLD	9	15	44	103	0	147.78	134570000	213900000	174560000	151400000	134960000	97156000	146080000	DLD	410	134570000	213900000	174560000	151400000	134960000	97156000	FALSE	FALSE	FALSE	FALSE	FALSE	FALSE	161878000	97156000	1.666165754	1738	DLD
A0A024R718;P43490;A0A0C4DFS8	PBEF1;NAMPT	7	28	69	178	0	323.31	134400000	394440000	307340000	257290000	257880000	191540000	145950000	PBEF1	412	134400000	394440000	307340000	257290000	257880000	191540000	FALSE	FALSE	FALSE	FALSE	FALSE	FALSE	270270000	191540000	1.411036859	10135	NAMPT;PBEF1
A0A024R732;Q13425;A0A140TA73;Q13425-2	SNTB2	7	4	7.8	10	0	7.9231	2352800	3814000	2551500	2311900	0	3344800	2030500	SNTB2	3360	2352800	3814000	2551500	2311900	2000344.146	3344800	FALSE	FALSE	FALSE	FALSE	TRUE	FALSE	2606108.829	3344800	0.779152365	6645	SNTB2
A0A024R745;Q16718;A0A087X1G1;H7BYD0;Q16718-2;F8WAS3;C9IZN5	NDUFA5	10	6	66.4	30	0	41.417	28092000	28966000	31564000	31888000	21689000	14540000	94472000	NDUFA5	591	28092000	28966000	31564000	31888000	21689000	14540000	FALSE	FALSE	FALSE	FALSE	FALSE	FALSE	28439800	14540000	1.955969739	4698	NDUFA5
A0A024R753;Q9NW13;Q9NW13-2	RBM28	8	12	18.6	24	0	58.967	13323000	30363000	20387000	24693000	20619000	7402800	7868600	RBM28	2308	13323000	30363000	20387000	24693000	20619000	7402800	FALSE	FALSE	FALSE	FALSE	FALSE	FALSE	21877000	7402800	2.955233155	55131	RBM28
B3KNG6;A0A024R755;O43852-2;O43852-4;O43852-15;O43852-8;H0Y875	CALU	10	3	57.1	9	0	21.318	0	37378000	35819000	28122000	29871000	0	20360000	B3KNG6	1585	1878491.694	37378000	35819000	28122000	29871000	1144159.267	TRUE	FALSE	FALSE	FALSE	FALSE	TRUE	26613698.34	1144159.267	23.26048401	813	CALU
B2R6H7;A0A024R794;Q9Y5L0;C9J7E5;Q9Y5L0-3;Q9Y5L0-1;E9PFH4;Q9Y5L0-5;B3KMX1;B3KM69	TNPO3	10	20	28.3	56	0	93.078	49454000	44963000	58804000	70942000	54903000	29323000	16916000	TNPO3	1721	49454000	44963000	58804000	70942000	54903000	29323000	FALSE	FALSE	FALSE	FALSE	FALSE	FALSE	55813200	29323000	1.903393241	23534	TNPO3
A0A024R7A8;P15121;Q59EL5;E9PCX2	AKR1B1	9	16	59.8	131	0	131.71	131930000	245770000	337820000	220310000	239840000	550270000	294070000	AKR1B1	215	131930000	245770000	337820000	220310000	239840000	550270000	FALSE	FALSE	FALSE	FALSE	FALSE	FALSE	235134000	550270000	0.427306595	231	AKR1B1
B2R4N3;A0A024R7B0;Q9BZL1	UBL5	4	4	41.1	22	0	18.439	22942000	28322000	13361000	16441000	10233000	17186000	82426000	UBL5	669	22942000	28322000	13361000	16441000	10233000	17186000	FALSE	FALSE	FALSE	FALSE	FALSE	FALSE	18259800	17186000	1.062481089	59286	UBL5
A0A024R7B7;Q16543;Q6FG59;K7EQA9;K7EKQ2;A1L0W4;K7EL68	CDC37;MBD5	8	12	35.4	54	0	73.513	130060000	96556000	100340000	107500000	103590000	127600000	136780000	CDC37	443	130060000	96556000	100340000	107500000	103590000	127600000	FALSE	FALSE	FALSE	FALSE	FALSE	FALSE	107609200	127600000	0.843332288	11140	CDC37;MBD5
A0A024R7C4;B4DUT2;Q8N9T8;H0YFD2;H0YH26;F8WFC1;B7ZLF4;B4DUY9	FLJ12949;KRI1	8	2	4.7	5	0	5.6405	3300200	2467800	2312600	1873000	0	0	1726200	FLJ12949	3473	3300200	2467800	2312600	1873000	1823653.974	1681975.083	FALSE	FALSE	FALSE	FALSE	TRUE	TRUE	2355450.795	1681975.083	1.400407663	65095	FLJ12949;KRI1
K7ES61;A0A024R7C5;Q9BYD3;K7EKI4;K7ELF1;K7ELQ0;X6RAY8;Q9BYD3-2	MRPL4	8	5	27	14	0	14.872	8391400	6202900	7277400	8450700	7762900	5852800	11194000	MRPL4	2022	8391400	6202900	7277400	8450700	7762900	5852800	FALSE	FALSE	FALSE	FALSE	FALSE	FALSE	7617060	5852800	1.301438628	51073	MRPL4
A0A024R7C7;Q12906;Q12906-7;F4ZW66;F4ZW64;A8K590;Q12906-5;Q12906-4;Q12906-2;Q12906-6;Q12906-3;F4ZW65;B4DFG4;Q59GP7	ILF3	25	27	40.5	182	0	194.67	252300000	319430000	352690000	345980000	344070000	431390000	159210000	ILF3	379	252300000	319430000	352690000	345980000	344070000	431390000	FALSE	FALSE	FALSE	FALSE	FALSE	FALSE	322894000	431390000	0.74849672	3609	ILF3
A0A024R7D0;P49366;A0A087WZK0;Q5J8M5;A0A024R7G5;A0A024R7E9;P49366-2;P49366-3	DHPS	17	7	26.6	10	0	39.256	7210900	6716500	7665500	10283000	5967000	8680600	4666100	DHPS	2757	7210900	6716500	7665500	10283000	5967000	8680600	FALSE	FALSE	FALSE	FALSE	FALSE	FALSE	7568580	8680600	0.871895952	1725	DHPS
K7ELQ9;A0A024R7D3;Q6UW68;K7EM09;K7EPR0	TMEM205;UNQ501	7	3	22.9	14	0	22.196	10101000	19800000	0	0	12004000	28019000	50037000	TMEM205	960	10101000	19800000	1378688.231	1809309.061	12004000	28019000	FALSE	FALSE	TRUE	TRUE	FALSE	FALSE	9018599.458	28019000	0.321874423	374882	TMEM205;UNQ501
A0A024R7E3;P26358;P26358-2;Q59FP7;I6L9H2;P26358-3	DNMT1	13	20	14.8	38	0	110.44	53263000	27215000	32631000	27417000	58246000	29055000	7867500	DNMT1	2309	53263000	27215000	32631000	27417000	58246000	29055000	FALSE	FALSE	FALSE	FALSE	FALSE	FALSE	39754400	29055000	1.368246429	1786	DNMT1
A0A024R7F1;K7ELL7;B4DJQ5;P14314-2;P14314;A0A0S2Z4D8;A0A0S2Z4W7;A2VCQ4	PRKCSH	14	20	45.5	121	0	252.01	308750000	298150000	225310000	199400000	284630000	575590000	372110000	PRKCSH	175	308750000	298150000	225310000	199400000	284630000	575590000	FALSE	FALSE	FALSE	FALSE	FALSE	FALSE	263248000	575590000	0.457353324	5589	PRKCSH
A0A024R7F7;Q4LE60;O14787-2;A0A075B780;Q05D48;B4DRY5;O14787;B3KPC8	TNPO2;TNPO2 variant protein	9	3	10	5	0	6.4957	2962700	2534800	0	0	0	4508800	1157700	TNPO2	3714	2962700	2534800	2123532.686	1406323.414	3285802.232	4508800	FALSE	FALSE	TRUE	TRUE	TRUE	FALSE	2462631.666	4508800	0.546183389	30000	TNPO2
A5PKY0;A0A024R7G6;M0R165;A8K5P4;Q9UBC2-4;Q9UBC2-3;Q9UBC2;Q9UBC2-2;M0R2S2;B4DQX5;B4DME4	EPS15L1	15	10	20.8	23	0	26.039	12188000	16583000	15068000	17928000	20424000	15178000	7313500	EPS15L1	2371	12188000	16583000	15068000	17928000	20424000	15178000	FALSE	FALSE	FALSE	FALSE	FALSE	FALSE	16438200	15178000	1.083028067	58513	EPS15L1
A8K1J3;A0A024R7G8;P54725-2;P54725-3;P54725;K7ENJ0;K7ELW1	RAD23A	9	5	16.3	10	0	9.5704	15589000	15872000	11529000	0	17365000	13579000	22834000	RAD23A	1499	15589000	15872000	11529000	2474516.761	17365000	13579000	FALSE	FALSE	FALSE	TRUE	FALSE	FALSE	12565903.35	13579000	0.925392397	5886	RAD23A
A0A024R7H5;B4E0Z6;Q10589-2;Q10589	BST2	4	3	18.3	6	0	12.897	13758000	5451800	0	0	7096700	111050000	37118000	BST2	1171	13758000	5451800	2744407.176	2194972.884	7096700	111050000	FALSE	FALSE	TRUE	TRUE	FALSE	FALSE	6249176.012	111050000	0.056273535	684	BST2
A8K2I7;A0A024R7I0;O14908;K7EM11;A0A024R7I1;O14908-2	GIPC1	9	7	25.5	29	0	38.23	34769000	18123000	20516000	2.40E+07	30419000	19404000	28605000	GIPC1	1348	34769000	18123000	20516000	2.40E+07	30419000	19404000	FALSE	FALSE	FALSE	FALSE	FALSE	FALSE	25565400	19404000	1.317532468	10755	GIPC1
A0A024R7I3;P61006;P61006-2	RAB8A	5	5	43.5	15	0	39.209	16515000	23345000	22701000	29424000	22462000	16315000	26623000	RAB8A	1404	16515000	23345000	22701000	29424000	22462000	16315000	FALSE	FALSE	FALSE	FALSE	FALSE	FALSE	22889400	16315000	1.402966595	4218	RAB8A
B4DHS5;A0A024R7I5;Q9NXH9-2;Q9NXH9;A8K8L2;B4E3A3;K7EQQ8;A0A024R7G3	TRMT1	14	8	15.6	13	0	21.743	9059600	4230900	7052400	8637000	5624900	7628000	4182900	TRMT1	2843	9059600	4230900	7052400	8637000	5624900	7628000	FALSE	FALSE	FALSE	FALSE	FALSE	FALSE	6920960	7628000	0.907309911	55621	TRMT1
A8K8B9;A0A024R7J0;P17612-2;P17612;Q15136;K7ERP6	PRKACA;KIN27	7	2	24.8	7	0	6.2411	0	0	8623700	8123300	7837300	20239000	7528800	PRKACA	2345	2433566.917	1191614.511	8623700	8123300	7837300	20239000	TRUE	TRUE	FALSE	FALSE	FALSE	FALSE	5641896.286	20239000	0.278763589	5566	PRKACA;KIN27
A0A024R7K8;Q59EK3;Q9BXS5;Q9BXS5-2;E7ENJ6;B3KNH5;B4DDG7;B4DN99;K7EJL1	AP1M1	25	14	41.6	61	0	54.631	36145000	33428000	42345000	44132000	50823000	32702000	26819000	AP1M1	1396	36145000	33428000	42345000	44132000	50823000	32702000	FALSE	FALSE	FALSE	FALSE	FALSE	FALSE	41374600	32702000	1.265200905	8907	AP1M1
M0R3F4;M0R2A4;M0R2K3;M0R193;M0R0I0;M0R2I2;A0A024R7L2;Q9NWV8;M0QXG9;J3KQS6;Q9NWV8-3	BABAM1;HSPC142	12	3	23.2	7	0	7.1262	4199100	3820200	0	0	4206600	3287600	5811000	BABAM1	2566	4199100	3820200	2473229.282	1926663.657	4206600	3287600	FALSE	FALSE	TRUE	TRUE	FALSE	FALSE	3325158.588	3287600	1.011424318	29086	BABAM1;HSPC142
A0A024R7L5;A0A024R7L8;Q92900-2;Q92900	UPF1	11	29	32	97	0	98.886	88107000	70008000	65106000	74476000	71494000	95034000	25019000	UPF1	1448	88107000	70008000	65106000	74476000	71494000	95034000	FALSE	FALSE	FALSE	FALSE	FALSE	FALSE	73838200	95034000	0.776966138	5976	UPF1
E9PQA6;A8K0C2;A0A024R7L6;Q96EY5-2;Q96EY5-3;Q96EY5;E9PLL0;E9PJW8	MVB12A;LOC93343	8	2	12.1	2	0	9.206	0	2108900	0	3170000	8733400	2019700	3266200	MVB12A	3028	2190965.141	2108900	3292027.594	3170000	8733400	2019700	TRUE	FALSE	TRUE	FALSE	FALSE	FALSE	3899058.547	2019700	1.930513713	93343	MVB12A;LOC93343
B2R8A2;A0A024R7M0;Q9BVK6	TMED9	4	5	33.2	25	0	182.48	29291000	43386000	30480000	35194000	36524000	29404000	52948000	TMED9	924	29291000	43386000	30480000	35194000	36524000	29404000	FALSE	FALSE	FALSE	FALSE	FALSE	FALSE	34975000	29404000	1.189464019	54732	TMED9
A0A024R7M8;Q96CT7;M0R2F5	LOC115098;CCDC124	3	8	33.2	45	0	125.71	24561000	28553000	21073000	34667000	21715000	33778000	47220000	LOC115098	1002	24561000	28553000	21073000	34667000	21715000	33778000	FALSE	FALSE	FALSE	FALSE	FALSE	FALSE	26113800	33778000	0.773100835	115098	CCDC124;LOC115098
A0A024R7P3;A0A024R7N2;Q9HD20-2;Q9HD20	ATP13A1	9	13	13.3	31	0	25.107	24409000	11709000	13548000	15299000	17598000	23882000	6477600	ATP13A1	2469	24409000	11709000	13548000	15299000	17598000	23882000	FALSE	FALSE	FALSE	FALSE	FALSE	FALSE	16512600	23882000	0.691424504	57130	ATP13A1
B2R8G6;A0A024R7P2;Q14318;Q14318-2;B7Z6M0;U3KQ64;A0A0A0MTJ1;Q14318-3	FKBP8	10	8	28.9	29	0	60.887	22484000	14078000	20839000	26273000	26494000	26047000	18616000	FKBP8	1662	22484000	14078000	20839000	26273000	26494000	26047000	FALSE	FALSE	FALSE	FALSE	FALSE	FALSE	22033600	26047000	0.845916996	23770	FKBP8
A0A024R7S3;P09497-2;P09497	CLTB	5	5	20.9	19	0	10.59	20450000	21825000	20195000	17098000	20491000	20035000	46637000	CLTB	1016	20450000	21825000	20195000	17098000	20491000	20035000	FALSE	FALSE	FALSE	FALSE	FALSE	FALSE	20011800	20035000	0.998842026	1212	CLTB
A0A024R7T3;P52597;B4DKS8	HNRPF;HNRNPF	3	11	43.9	89	0	154.8	177250000	138320000	241420000	202690000	191100000	147200000	196140000	HNRPF	309	177250000	138320000	241420000	202690000	191100000	147200000	FALSE	FALSE	FALSE	FALSE	FALSE	FALSE	190156000	147200000	1.291820652	3185	HNRNPF;HNRPF
B4DLA6;B3KMX0;A0A024R7U6;P33991	MCM4	7	29	43.5	107	0	162.2	85496000	48580000	102470000	128710000	128810000	142150000	35077000	MCM4	1212	85496000	48580000	102470000	128710000	128810000	142150000	FALSE	FALSE	FALSE	FALSE	FALSE	FALSE	98813200	142150000	0.69513331	4173	MCM4
A0A024R7X3;A0A024R7U9;Q9UI12-2;Q9UI12;G3V126;B4E054;B3KUZ7;Q8TF11	ATP6V1H	14	17	44.3	51	0	82.147	74857000	56998000	48431000	53476000	47571000	65854000	42464000	ATP6V1H	1084	74857000	56998000	48431000	53476000	47571000	65854000	FALSE	FALSE	FALSE	FALSE	FALSE	FALSE	56266600	65854000	0.85441431	51606	ATP6V1H
A0A024R7V6;P61019;A0A0A1HAW1;P61019-2;E9PKL7	RAB2;RAB2A	13	7	64.2	21	0	167.3	63792000	60132000	19969000	29050000	19171000	41156000	54016000	RAB2	914	63792000	60132000	19969000	29050000	19171000	41156000	FALSE	FALSE	FALSE	FALSE	FALSE	FALSE	38422800	41156000	0.93358927	5862	RAB2A;RAB2
A0A024R7W0;Q9NX62	IMPAD1	3	3	12.3	6	0	7.4901	11004000	4750800	0	0	3082400	2249000	5508500	IMPAD1	2624	11004000	4750800	2280376.172	2018387.592	3082400	2249000	FALSE	FALSE	TRUE	TRUE	FALSE	FALSE	4627192.753	2249000	2.057444532	54928	IMPAD1
A0A024R7W9;Q92905;Q59GH5;E5RHH5	COPS5	6	7	22.8	30	0	23.353	30145000	25563000	27676000	27901000	24077000	31176000	30594000	COPS5	1290	30145000	25563000	27676000	27901000	24077000	31176000	FALSE	FALSE	FALSE	FALSE	FALSE	FALSE	27072400	31176000	0.868373108	10987	COPS5
A0A024R7X0;Q9Y6D6;Q59FY5;E5RIF2;B3KMS9;E5RHL7	ARFGEF1	7	4	5.7	5	0	7.7937	2925200	2379800	0	0	0	3591500	438590	ARFGEF1	4079	2925200	2379800	2896109.612	1841447.035	3941262.543	3591500	FALSE	FALSE	TRUE	TRUE	TRUE	FALSE	2796763.838	3591500	0.778717482	10565	ARFGEF1
E5RHG8;A0A024R7Y5;Q15369;Q15369-2;R4GMY8	TCEB1	5	6	82	48	0	66.355	88374000	70528000	61077000	68012000	68411000	91102000	220500000	TCEB1	283	88374000	70528000	61077000	68012000	68411000	91102000	FALSE	FALSE	FALSE	FALSE	FALSE	FALSE	71280400	91102000	0.782424096	6921	ELOC;TCEB1
A0A024R7Z5;O00560-2;O00560;B4DHN5;E9PBU7;B4DQ93;G5EA09;O00560-3	SDCBP	8	7	43	42	0	61.902	46352000	46027000	23033000	43194000	30226000	16249000	63886000	SDCBP	819	46352000	46027000	23033000	43194000	30226000	16249000	FALSE	FALSE	FALSE	FALSE	FALSE	FALSE	37766400	16249000	2.324229183	6386	SDCBP
A0A024R811;Q53H82	LACTB2	2	9	40.6	32	0	27.158	25200000	23333000	18119000	21390000	7770700	41892000	28363000	LACTB2	1356	25200000	23333000	18119000	21390000	7770700	41892000	FALSE	FALSE	FALSE	FALSE	FALSE	FALSE	19162540	41892000	0.457427194	51110	LACTB2
A0A024R814;P18124;A8MUD9	RPL7	5	6	47.1	47	0	323.31	183630000	173290000	235150000	279570000	226440000	243940000	303220000	RPL7	211	183630000	173290000	235150000	279570000	226440000	243940000	FALSE	FALSE	FALSE	FALSE	FALSE	FALSE	219616000	243940000	0.900286956	6129	RPL7
A0A024R819;A0A024R858;P36639-4;P36639-3;P36639-2;P36639	NUDT1	6	3	25.6	5	0	9.5054	14972000	10094000	0	5419100	6082800	2442700	18107000	NUDT1	1676	14972000	10094000	3711880.978	5419100	6082800	2442700	FALSE	FALSE	TRUE	FALSE	FALSE	FALSE	8055956.196	2442700	3.297971996	4521	NUDT1
B4DV79;A4D210;A0A024R821;P55884;P55884-2;B4DXN6;Q96G38;Q86UM1	EIF3B;EIF3S9	11	30	44.4	166	0	231.64	210870000	233400000	223220000	240840000	244680000	212980000	110830000	EIF3B	522	210870000	233400000	223220000	240840000	244680000	212980000	FALSE	FALSE	FALSE	FALSE	FALSE	FALSE	230602000	212980000	1.082740163	8662	EIF3S9;EIF3B
A0A024R829;Q9NRF9	POLE3	2	3	30.6	4	0	9.2566	4034200	3744200	3428200	4043700	4547700	8652000	9134700	POLE3	2189	4034200	3744200	3428200	4043700	4547700	8652000	FALSE	FALSE	FALSE	FALSE	FALSE	FALSE	3959600	8652000	0.45765141	54107	POLE3
A0A024R830;A0A140VJL8;P29218;P29218-3;H0YBL1;E5RG13;E5RIP7	IMPA1	13	8	34.3	35	0	35.105	51288000	43721000	28690000	33705000	22902000	42191000	56154000	IMPA1	893	51288000	43721000	28690000	33705000	22902000	42191000	FALSE	FALSE	FALSE	FALSE	FALSE	FALSE	36061200	42191000	0.85471309	3612	IMPA1
A0A024R836;C9JQV0;Q9BRJ6;H7C0T1;H7C2R9	MGC11257;C7orf50	5	2	21	5	0.00026274	3.777	0	6111600	0	0	3840800	3708100	7677200	MGC11257	2329	2924146.167	6111600	1740438.039	3302481.018	3840800	3708100	TRUE	FALSE	TRUE	TRUE	FALSE	FALSE	3583893.045	3708100	0.966503882	84310	C7orf50;MGC11257
A0A024R843;Q13049	TRIM32	3	7	13.8	5	0	34.332	8540800	3229600	0	3092700	0	3323600	1904900	TRIM32	3392	8540800	3229600	1351305.033	3092700	3680899.179	3323600	FALSE	FALSE	TRUE	FALSE	TRUE	FALSE	3979060.842	3323600	1.197214118	22954	TRIM32
A0A024R845;P61106;X6RFL8	RAB14	3	14	85.1	77	0	92.346	152080000	146300000	73774000	84876000	64464000	108490000	137280000	RAB14	439	152080000	146300000	73774000	84876000	64464000	108490000	FALSE	FALSE	FALSE	FALSE	FALSE	FALSE	104298800	108490000	0.961367868	51552	RAB14
A0A024R861;O00743;O00743-3;O00743-2;B7Z3E2	PPP6C	7	8	32.8	27	0	22.172	13673000	13097000	15078000	22675000	14027000	15415000	17138000	PPP6C	1716	13673000	13097000	15078000	22675000	14027000	15415000	FALSE	FALSE	FALSE	FALSE	FALSE	FALSE	15710000	15415000	1.019137204	5537	PPP6C
F8W9S7;A0A024R875;A0A024R862;A0A024R8A2;Q14C86-3;Q14C86-4;Q14C86-5;Q14C86-2;Q14C86;Q14C86-6;B3KTX2;B3KN67	GAPVD1	18	7	6.4	16	0	16.36	12593000	8007600	6501800	11671000	8922900	8261900	2721200	GAPVD1	3152	12593000	8007600	6501800	11671000	8922900	8261900	FALSE	FALSE	FALSE	FALSE	FALSE	FALSE	9539260	8261900	1.154608504	26130	GAPVD1
A0A024R872;Q96TA1-2;Q96TA1	C9orf88;FAM129B	6	20	32.9	66	0	106.25	35762000	55545000	76746000	74022000	81051000	141980000	40460000	C9orf88	1117	35762000	55545000	76746000	74022000	81051000	141980000	FALSE	FALSE	FALSE	FALSE	FALSE	FALSE	64625200	141980000	0.455171151	64855	FAM129B
B7Z3I9;A0A140VJL9;A0A024R877;Q6ZMU0;P13716;P13716-2;B7ZBK6	ALAD	7	4	16	9	0	16.054	9730700	5897500	6511600	7015300	0	6673100	8367300	ALAD	2261	9730700	5897500	6511600	7015300	2003596.351	6673100	FALSE	FALSE	FALSE	FALSE	TRUE	FALSE	6231739.27	6673100	0.933859716	210	ALAD
Q5T9B9;A8K2X4;A0A024R878;P17813-2;P17813;Q96CG0	ENG	11	3	6.4	3	0	23.871	3870300	0	0	0	2787800	13617000	3081400	ENG	3075	3870300	1849824.177	2383579.895	3955586.48	2787800	13617000	FALSE	TRUE	TRUE	TRUE	FALSE	FALSE	2969418.11	13617000	0.218066983	2022	ENG
B4E2V5;B4DZK8;A0A024R882;P27105	STOM	7	11	69.2	49	0	104.63	32036000	68758000	59176000	66175000	67199000	141710000	94206000	STOM	592	32036000	68758000	59176000	66175000	67199000	141710000	FALSE	FALSE	FALSE	FALSE	FALSE	FALSE	58668800	141710000	0.414006069	2040	STOM
A0A024R883;O75348	ATP6V1G1	5	5	41.5	20	0	201.89	32591000	40970000	48199000	45034000	37161000	38864000	127490000	ATP6V1G1	463	32591000	40970000	48199000	45034000	37161000	38864000	FALSE	FALSE	FALSE	FALSE	FALSE	FALSE	40791000	38864000	1.049583162	9550	ATP6V1G1
B2RCX0;A0A024R895;Q01105-2;A0A0C4DFV9;Q01105-3;Q01105-4;A0A087X027;P0DME0	SET;SETSIP	8	2	43.7	13	0	323.31	66667000	55549000	8704200	21442000	8124600	9426100	66323000	B2RCX0	791	66667000	55549000	8704200	21442000	8124600	9426100	FALSE	FALSE	FALSE	FALSE	FALSE	FALSE	32097360	9426100	3.405158019	6418	SET;SETSIP
B3KPC7;A0A024R897;Q9BPX5	ARPC5L	3	3	28.8	12	0	15.478	0	11426000	8584800	0	10020000	22735000	24020000	ARPC5L	1467	2018584.784	11426000	8584800	3696269.898	10020000	22735000	TRUE	FALSE	FALSE	TRUE	FALSE	FALSE	7149130.936	22735000	0.314454847	81873	ARPC5L
A0A024R8A7;Q96I24;Q96I24-2	hCG_31253;FUBP3	3	14	39.5	40	0	39.679	18590000	30208000	25699000	29266000	33983000	59069000	18599000	hCG_31253	1663	18590000	30208000	25699000	29266000	33983000	59069000	FALSE	FALSE	FALSE	FALSE	FALSE	FALSE	27549200	59069000	0.466390154	8939	FUBP3
A0A024R8B6;P35658-2;P35658-4;P35658;P35658-3;P35658-5;Q7Z3C4;A0A0A0MSW3	NUP214;DKFZp686J0330	14	9	6.1	15	0	17.286	6700200	5970900	6231100	9150200	6863600	10493000	2100300	NUP214	3334	6700200	5970900	6231100	9150200	6863600	10493000	FALSE	FALSE	FALSE	FALSE	FALSE	FALSE	6983200	10493000	0.66551034	8021	NUP214;DKFZp686J0330
A0A024R8C7;Q9BTM9-3;Q9BTM9;Q9BTM9-2	C9orf74;URM1	4	2	19.8	12	0	5.2787	12912000	11654000	7554400	9406700	6695100	8629700	58845000	C9orf74	862	12912000	11654000	7554400	9406700	6695100	8629700	FALSE	FALSE	FALSE	FALSE	FALSE	FALSE	9644440	8629700	1.117586938	81605	URM1
A0A024R8C8;Q9NVG8;B4DHM6;Q59F95;Q9NVG8-3	TBC1D13	7	3	8.8	3	0	5.8696	0	6116200	9350400	9319500	0	11803000	4128400	TBC1D13	2856	2569382.911	6116200	9350400	9319500	4089656.828	11803000	TRUE	FALSE	FALSE	FALSE	TRUE	FALSE	6289027.948	11803000	0.532833004	54662	TBC1D13
A0A024R8D4;Q9Y399;Q5T8A0	MRPS2	3	7	20.1	14	0	10.995	6744400	8694700	12523000	8664700	8419900	9306000	9735500	MRPS2	2145	6744400	8694700	12523000	8664700	8419900	9306000	FALSE	FALSE	FALSE	FALSE	FALSE	FALSE	9009340	9306000	0.968121642	51116	MRPS2
A0A024R8E4;Q9BV86-2;Q9BV86;S4R344;S4R3J7	C9orf32;NTMT1	5	4	16.1	11	0	15.073	13366000	11360000	13031000	17191000	14502000	12163000	25124000	C9orf32	1444	13366000	11360000	13031000	17191000	14502000	12163000	FALSE	FALSE	FALSE	FALSE	FALSE	FALSE	13890000	12163000	1.141987996	28989	C9orf32;NTMT1
A0A087WX92;A8K302;A0A024R8J3;O15403	SLC16A6	4	4	5.9	6	0	6.9286	2538200	7800400	0	3896800	0	0	4465400	SLC16A6	2789	2538200	7800400	2113203.105	3896800	2136539.303	1674625.837	FALSE	FALSE	TRUE	FALSE	TRUE	TRUE	3697028.482	1674625.837	2.207674335	9120	SLC16A6
A0A024R8L0;J3QLS3;Q9Y2R9;J3QKW2;J3QQS1;J3KSI8	MRPS7	6	6	30.6	11	0	15.477	17942000	0	15785000	15748000	16330000	15789000	17920000	MRPS7	1679	17942000	2401817.322	15785000	15748000	16330000	15789000	FALSE	TRUE	FALSE	FALSE	FALSE	FALSE	13641363.46	15789000	0.863978939	51081	MRPS7
K7EIJ0;K7ENL2;A6NG10;K7EMC9;A0A024R8L1;Q969T9;B4DFL8;B4DFG2;Q7Z511;K7EIN1;K7ESN4;B4DV07	WBP2	13	4	20.4	13	0	11.198	4614900	0	10277000	15293000	7861900	0	23051000	WBP2	1496	4614900	2160411.309	10277000	15293000	7861900	1592289.717	FALSE	TRUE	FALSE	FALSE	FALSE	TRUE	8041442.262	1592289.717	5.050238143	23558	WBP2
A0A024R8T3;A0A024R8L7;Q15067-2;Q15067;B4DU07;Q15067-3	ACOX1	10	9	19.4	9	0	24.875	0	5644000	5877800	5002900	6163400	4470800	4159500	ACOX1	2852	3300794.163	5644000	5877800	5002900	6163400	4470800	TRUE	FALSE	FALSE	FALSE	FALSE	FALSE	5197778.833	4470800	1.162605984	51	ACOX1
A0A024R8M0;Q14344;B4DWV9;Q14344-2	GNA13	4	7	19.4	14	0	19.446	9226600	12662000	9661300	9830600	8989400	9297700	8884900	GNA13	2210	9226600	12662000	9661300	9830600	8989400	9297700	FALSE	FALSE	FALSE	FALSE	FALSE	FALSE	10073980	9297700	1.083491616	10672	GNA13
A0A024R8M4;Q14558;Q14558-2;B4DP31;C9J168	PRPSAP1	8	9	45.5	28	0	30.479	8166500	8049300	15102000	15856000	14452000	11519000	10473000	PRPSAP1	2081	8166500	8049300	15102000	15856000	14452000	11519000	FALSE	FALSE	FALSE	FALSE	FALSE	FALSE	12325160	11519000	1.069985242	5635	PRPSAP1
B5BU32;A0A024R8N6;P04183;B5BUF9;K7ERV3;K7ES52;K7ERJ1	TK1	8	6	35	31	0	20.838	5661500	5638000	18338000	26966000	30122000	29700000	22118000	TK1	1522	5661500	5638000	18338000	26966000	30122000	29700000	FALSE	FALSE	FALSE	FALSE	FALSE	FALSE	17345100	29700000	0.584010101	7083	TK1
A0A024R8P8;P63173;J3KT73;J3QL01;J3KSP2	RPL38	5	6	50	72	0	61.578	120200000	112070000	146640000	154900000	162340000	124070000	744380000	RPL38	80	120200000	112070000	146640000	154900000	162340000	124070000	FALSE	FALSE	FALSE	FALSE	FALSE	FALSE	139230000	124070000	1.122189087	6169	RPL38
A0A024R8Q1;P10253	GAA	4	5	13.1	18	0	26.192	0	7607600	16304000	11142000	11627000	13918000	4202500	GAA	2840	1536734.293	7607600	16304000	11142000	11627000	13918000	TRUE	FALSE	FALSE	FALSE	FALSE	FALSE	9643466.859	13918000	0.692877343	2548	GAA
A0A024R8R4;Q8TAT6;Q8TAT6-2;B4DG89	NPLOC4	9	13	31.4	31	0	78.841	22955000	22276000	29875000	23334000	30063000	22871000	18718000	NPLOC4	1658	22955000	22276000	29875000	23334000	30063000	22871000	FALSE	FALSE	FALSE	FALSE	FALSE	FALSE	25700600	22871000	1.123719995	55666	NPLOC4
I3L2L5;A0A024R8R5;I3L4Q0;C9JLW8;I3L317	FAM195B;hCG_1818442	5	2	23.9	4	0.000518	3.5883	0	5293200	3210900	3539000	0	2606400	8724000	FAM195B	2224	1190318.302	5293200	3210900	3539000	5107721.09	2606400	TRUE	FALSE	FALSE	FALSE	TRUE	FALSE	3668227.878	2606400	1.407392525	348262	MCRIP1
A0A024R8S5;P07237;B4DUA5;H7BZ94;B4DNL5;B4DLN6;H0Y3Z3;I3L398;Q96C96	P4HB	20	36	66.3	318	0	323.31	1.23E+09	1521500000	1022200000	776800000	1188900000	1886200000	747680000	P4HB	79	1.23E+09	1521500000	1022200000	776800000	1188900000	1886200000	FALSE	FALSE	FALSE	FALSE	FALSE	FALSE	1148680000	1886200000	0.608991623	5034	P4HB
A0A024R8T9;O43760;O43760-2;K7ELD9;K7ENG9;K7ELS8	SYNGR2	7	4	17	5	0	12.697	0	0	5865200	6502500	0	10072000	28799000	SYNGR2	1342	2110816.383	2890598.28	5865200	6502500	3060540.519	10072000	TRUE	TRUE	FALSE	FALSE	TRUE	FALSE	4085931.037	10072000	0.405672263	9144	SYNGR2
A0A024R8U1;O15427;Q53G91	SLC16A3	13	5	11.6	30	0	13.741	0	16402000	19477000	15940000	44848000	31800000	20812000	SLC16A3	1565	1869268.608	16402000	19477000	15940000	44848000	31800000	TRUE	FALSE	FALSE	FALSE	FALSE	FALSE	19707253.72	31800000	0.61972496	9123	SLC16A3
J3KP15;Q53FN0;A0A024R8U5;Q01130;J3QL05;B3KUY1;Q01130-2;Q8NAK9;B3KX15;Q6NXQ0;Q8N220;B3KVY2;B3KUF7	SRSF2;SFRS2	18	6	50	27	0	58.232	57030000	102350000	108870000	106970000	90608000	108930000	232090000	SRSF2	269	57030000	102350000	108870000	106970000	90608000	108930000	FALSE	FALSE	FALSE	FALSE	FALSE	FALSE	93165600	108930000	0.855279537	6427	SFRS2;SRSF2
E7D7X9;A0A024R8U9;P32322;P32322-3;E2QRB3;E7D7Y0;P32322-2;J3KQ22;Q2TU78;B7Z8T1;J3QKT4;Q8TBX0;J3QL24	PYCR1;PIG45	21	10	50.2	28	0	58.034	25335000	12641000	39167000	36054000	42293000	36836000	28721000	PYCR1	1343	25335000	12641000	39167000	36054000	42293000	36836000	FALSE	FALSE	FALSE	FALSE	FALSE	FALSE	31098000	36836000	0.844228472	5831	PYCR1
A0A024R8W0;P38919	DDX48;EIF4A3	3	21	60.1	98	0	163.26	143600000	186020000	180490000	180340000	199320000	160770000	123630000	DDX48	475	143600000	186020000	180490000	180340000	199320000	160770000	FALSE	FALSE	FALSE	FALSE	FALSE	FALSE	177954000	160770000	1.106885613	9775	EIF4A3
Q53GB9;A0A024R8Z1;Q5VV89;O14880	MGST3	5	4	23.7	39	0	133.59	66272000	20832000	62945000	44580000	40329000	54242000	150270000	MGST3	405	66272000	20832000	62945000	44580000	40329000	54242000	FALSE	FALSE	FALSE	FALSE	FALSE	FALSE	46991600	54242000	0.866332362	4259	MGST3
A8K4A8;A0A024R8Z9;Q6PI48;Q9NVT8;Q9H9J7	DARS2	6	14	28.5	28	0	58.076	37858000	6721300	93005000	55391000	36572000	19889000	12828000	DARS2	1922	37858000	6721300	93005000	55391000	36572000	19889000	FALSE	FALSE	FALSE	FALSE	FALSE	FALSE	45909460	19889000	2.308283976	55157	DARS2
A0A024R904;Q9HB71;Q6NVY0;Q9HB71-3	CACYBP	7	14	68	113	0	209.36	215350000	69350000	218370000	201830000	244730000	125200000	283990000	CACYBP	219	215350000	69350000	218370000	201830000	244730000	125200000	FALSE	FALSE	FALSE	FALSE	FALSE	FALSE	189926000	125200000	1.516980831	27101	CACYBP
A0A024R957;Q8NFQ8	TOR1AIP2	2	5	16.8	10	0	10.426	5032000	9571500	9148200	7834300	10560000	7043300	5423400	A0A024R957	2642	5032000	9571500	9148200	7834300	10560000	7043300	FALSE	FALSE	FALSE	FALSE	FALSE	FALSE	8429200	7043300	1.19676856	163590	TOR1AIP2
B2R8K8;A0A024R964;Q8TDX7	NEK7	16	8	33.8	19	0	19.137	10762000	7891800	6396300	7699800	7509700	19329000	10597000	NEK7	2068	10762000	7891800	6396300	7699800	7509700	19329000	FALSE	FALSE	FALSE	FALSE	FALSE	FALSE	8051920	19329000	0.41657199	140609	NEK7
A7E2D8;A0A024R968;P23634-5;P23634-4;P23634-3;P23634-2;P23634-7;P23634-6;P23634-8;P23634;A8K8U3;Q68DH9	ATP2B4;DKFZp686M088	48	8	17.8	21	0	66.589	18357000	4746700	8917800	5791700	10462000	22780000	5449400	ATP2B4	2634	18357000	4746700	8917800	5791700	10462000	22780000	FALSE	FALSE	FALSE	FALSE	FALSE	FALSE	9655040	22780000	0.423838455	493	ATP2B4
A0A024R972;P11047	LAMC1	3	11	8.7	21	0	30.683	8647200	6083900	14280000	17994000	31255000	20662000	2664600	LAMC1	3167	8647200	6083900	14280000	17994000	31255000	20662000	FALSE	FALSE	FALSE	FALSE	FALSE	FALSE	15652020	20662000	0.757526861	3915	LAMC1
A0A024R978;Q9BZQ8	C1orf24;FAM129A	3	10	13.6	15	0	30.536	29037000	0	4090200	5532600	5343200	5445600	5619600	C1orf24	2605	29037000	1989020.203	4090200	5532600	5343200	5445600	FALSE	TRUE	FALSE	FALSE	FALSE	FALSE	9198404.041	5445600	1.689144271	116496	C1orf24;FAM129A
A0A024R983;P10155;P10155-3;P10155-5;P10155-4;B3KN94	TROVE2	11	16	33.1	72	0	151.97	71568000	26883000	64057000	67266000	61215000	50330000	31480000	TROVE2	1278	71568000	26883000	64057000	67266000	61215000	50330000	FALSE	FALSE	FALSE	FALSE	FALSE	FALSE	58197800	50330000	1.15632426	6738	TROVE2
A0A024R994;O75131;Q05DL8;A0A087WYQ3;E5RHZ0	CPNE3	29	16	35.8	58	0	46.712	83282000	42986000	72899000	50481000	51844000	62571000	44101000	CPNE3	1054	83282000	42986000	72899000	50481000	51844000	62571000	FALSE	FALSE	FALSE	FALSE	FALSE	FALSE	60298400	62571000	0.96367966	8895	CPNE3
A0A024R9A9;Q9NPD8	UBE2T	2	4	19.8	4	0	5.6741	10466000	3058700	0	0	8378300	3280200	7698500	UBE2T	2326	10466000	3058700	1853833.99	2021643.215	8378300	3280200	FALSE	FALSE	TRUE	TRUE	FALSE	FALSE	5155695.441	3280200	1.571762527	29089	UBE2T
A0A024R9B7;P09669	COX6C	2	6	49.3	25	0	9.3282	28558000	30642000	46854000	45575000	15891000	50978000	159850000	COX6C	378	28558000	30642000	46854000	45575000	15891000	50978000	FALSE	FALSE	FALSE	FALSE	FALSE	FALSE	33504000	50978000	0.657224685	1345	COX6C
A0A024R9B8;Q9Y646;E5RH35;E5RJZ7;E5RJP8;E5RJA8	PGCP;CPQ	7	5	12.1	4	0	30.025	12997000	5539300	5933600	0	0	0	4806600	PGCP	2726.5	12997000	5539300	5933600	4103323.073	1983748.26	2145056.062	FALSE	FALSE	FALSE	TRUE	TRUE	TRUE	6111394.267	2145056.062	2.849060393	10404	CPQ;PGCP
B3KPZ7;A0A024R9C0;B4DYX8;Q6P1N1;Q9P0J1;Q9P0J1-2	PPM2C;PDP1	8	8	16.8	22	0	37.782	10613000	6519500	13037000	6726800	8151100	22130000	6703700	PPM2C	2444	10613000	6519500	13037000	6726800	8151100	22130000	FALSE	FALSE	FALSE	FALSE	FALSE	FALSE	9009480	22130000	0.407116132	54704	PDP1;PPM2C
A0A024R9C1;P11940;A0A087WTT1;E7EQV3;P11940-2;B4DZW4;E7ERJ7;B4DQX0;A0A024R9E2;B3KT93;H0YAR2;Q2VIP3;Q5VX58;Q3ZCS4;Q9H361	PABPC1;PABPC3	35	21	47.8	196	0	323.31	349060000	268300000	375630000	365410000	348700000	363480000	195560000	PABPC1	311	349060000	268300000	375630000	365410000	348700000	363480000	FALSE	FALSE	FALSE	FALSE	FALSE	FALSE	341420000	363480000	0.939308903	26986	PABPC1;PABPC3
A0A024R9D2;Q86UE4	MTDH	4	2	29.6	13	0	149.95	6760500	8599000	6194700	0	0	13746000	6443700	A0A024R9D2	2471	6760500	8599000	6194700	2154690.936	1686634.74	13746000	FALSE	FALSE	FALSE	TRUE	TRUE	FALSE	5079105.135	13746000	0.369496954	92140	MTDH
A0A024R9D3;P62888;E5RI99;A0A0C4DH44	RPL30	6	8	67	79	0	171.14	263310000	227640000	310790000	305270000	301740000	234730000	785360000	RPL30	72	263310000	227640000	310790000	305270000	301740000	234730000	FALSE	FALSE	FALSE	FALSE	FALSE	FALSE	281750000	234730000	1.200315256	6156	RPL30
A0A024R9D7;Q16698-2;Q16698;E5RJG7;Q7LDK6;E5RFV2;E5RJD2	DECR1;DECR	9	9	30.4	48	0	109.39	127390000	63353000	50157000	31751000	26719000	127970000	65563000	DECR1	800	127390000	63353000	50157000	31751000	26719000	127970000	FALSE	FALSE	FALSE	FALSE	FALSE	FALSE	59874000	127970000	0.467875283	1666	DECR1;DECR
A0A024R9D9;Q9NPA8-2;Q9NPA8;E5RHX8	ENY2	8	3	32.7	11	0	7.8434	11572000	5945000	9209400	10029000	9213900	9178900	29880000	ENY2	1305	11572000	5945000	9209400	10029000	9213900	9178900	FALSE	FALSE	FALSE	FALSE	FALSE	FALSE	9193860	9178900	1.001629825	56943	ENY2
B4E1G1;A0A024R9G3;Q9BUN8-2;Q9BUN8;E5RGY0	DERL1	5	3	21.9	7	0	20.946	0	0	10813000	10683000	10202000	27750000	16317000	DERL1	1749	1637827.209	2537056.538	10813000	10683000	10202000	27750000	TRUE	TRUE	FALSE	FALSE	FALSE	FALSE	7174576.749	27750000	0.258543306	79139	DERL1
A0A024R9G4;Q9NUQ9;Q68D08;E5RI16	FAM49B;DKFZp686B04128	18	15	55.9	70	0	177.05	108730000	82206000	95070000	99513000	125600000	95450000	94717000	FAM49B	590	108730000	82206000	95070000	99513000	125600000	95450000	FALSE	FALSE	FALSE	FALSE	FALSE	FALSE	102223800	95450000	1.070966998	51571	FAM49B;DKFZp686B04128
A0A024R9I0;P21283;E7EV59;B7Z593	ATP6V1C1	8	24	59.2	79	0	117.91	163160000	120410000	68159000	56420000	68530000	68652000	86290000	ATP6V1C1	638	163160000	120410000	68159000	56420000	68530000	68652000	FALSE	FALSE	FALSE	FALSE	FALSE	FALSE	95335800	68652000	1.388682049	528	ATP6V1C1
A0A024R9J0;O60216;B3KUT8	RAD21	14	8	14.4	18	0	18.574	9189300	11683000	9101700	9388800	9973700	13107000	7647500	RAD21	2330	9189300	11683000	9101700	9388800	9973700	13107000	FALSE	FALSE	FALSE	FALSE	FALSE	FALSE	9867300	13107000	0.752826734	5885	RAD21
A0A024R9K7;Q9NPA0;H0YDX2;H0YDT8	C15orf24;EMC7	4	3	15	10	0	8.453	7690400	0	7092200	9200200	6633700	7099200	8196900	C15orf24	2278	7690400	3266356.962	7092200	9200200	6633700	7099200	FALSE	TRUE	FALSE	FALSE	FALSE	FALSE	6776571.392	7099200	0.95455423	56851	EMC7;C15orf24
H3BSW0;A0A024R9M3;Q8N9N7	LRRC57	3	3	20.9	11	0	7.1958	2487600	3462800	4408600	5883700	3583800	5547900	5388300	LRRC57	2647	2487600	3462800	4408600	5883700	3583800	5547900	FALSE	FALSE	FALSE	FALSE	FALSE	FALSE	3965300	5547900	0.71473891	255252	LRRC57
A0A024R9M9;Q99653;H0YKE7;F5GX29;B4DSB5;H0YNG9	CHP;CHP1	8	8	47.7	24	0	47.482	22564000	22019000	23713000	26375000	31307000	11572000	37941000	CHP	1154	22564000	22019000	23713000	26375000	31307000	11572000	FALSE	FALSE	FALSE	FALSE	FALSE	FALSE	25195600	11572000	2.17729001	11261	CHP1;CHP
A8K9B9;A0A024R9N6;Q9H223;A0A087WUA5	EHD4	4	11	33.5	38	0	88.016	12669000	44553000	19920000	16138000	23763000	49178000	19567000	EHD4	1618	12669000	44553000	19920000	16138000	23763000	49178000	FALSE	FALSE	FALSE	FALSE	FALSE	FALSE	23408600	49178000	0.475997397	30844	EHD4
A0A024R9R3;Q9P253	VPS18	2	3	3.4	8	0	9.7917	4686000	4365800	3698100	4101600	0	2879400	1388800	VPS18	3615	4686000	4365800	3698100	4101600	1461728.251	2879400	FALSE	FALSE	FALSE	FALSE	TRUE	FALSE	3662645.65	2879400	1.272016965	57617	VPS18
A0A024R9U3;Q9NX40;D6RDK6;D6RBN5;D6RG39;D6RIT9;Q9NX40-3;Q9NX40-2;Q9NX40-4;D6RDI5;D6RA54;D6RC55	OCIAD1	20	8	38	32	0	28.804	25782000	28916000	19900000	19652000	16698000	47207000	55590000	OCIAD1	898	25782000	28916000	19900000	19652000	16698000	47207000	FALSE	FALSE	FALSE	FALSE	FALSE	FALSE	22189600	47207000	0.470048933	54940	OCIAD1
A0A024R9U8;A0A024R9W5;Q7Z6Z7-2;Q7Z6Z7-3;Q7Z6Z7;A0A024R9Y3;Q5H924	HUWE1	16	39	12.5	98	0	149.81	30215000	37744000	101780000	85550000	93018000	62360000	5117000	HUWE1	2689	30215000	37744000	101780000	85550000	93018000	62360000	FALSE	FALSE	FALSE	FALSE	FALSE	FALSE	69661400	62360000	1.11708467	10075	HUWE1
A0A024R9V7;Q8IWE2;B4DL61;B4E1Z8;Q8IWE2-2	LOC92689;FAM114A1	6	13	30.4	34	0	63.694	28291000	23977000	40800000	38922000	38517000	72997000	27492000	LOC92689	1378	28291000	23977000	40800000	38922000	38517000	72997000	FALSE	FALSE	FALSE	FALSE	FALSE	FALSE	34101400	72997000	0.467161664	92689	FAM114A1;LOC92689
A6QKW0;A0A024R9W7;P57088;D6RAA6	SHINC3;TMEM33	7	8	33.6	40	0	96.523	67475000	70671000	70207000	103260000	73768000	64140000	114610000	SHINC3	501	67475000	70671000	70207000	103260000	73768000	64140000	FALSE	FALSE	FALSE	FALSE	FALSE	FALSE	77076200	64140000	1.201686935	55161	TMEM33;SHINC3
A0A024R9X5;Q8TDQ7;Q8TDQ7-3;Q8TDQ7-2;Q8TDQ7-4;Q8TDQ7-5	GNPDA2	6	2	29.3	3	0	4.006	0	0	2769700	2276400	0	4254100	2375600	GNPDA2	3255	1716900.473	1510648.048	2769700	2276400	1526259.88	4254100	TRUE	TRUE	FALSE	FALSE	TRUE	FALSE	1959981.68	4254100	0.460727693	132789	GNPDA2
A0A024R9Y7;Q9UNF1;Q5H909;Q9UNF1-2;B4DX55;Q5H907	MAGED2	23	19	44.4	70	0	100.26	32445000	47432000	163270000	187480000	115970000	29129000	38732000	MAGED2	1143	32445000	47432000	163270000	187480000	115970000	29129000	FALSE	FALSE	FALSE	FALSE	FALSE	FALSE	109319400	29129000	3.752940369	10916	MAGED2
A0A024R9Z0;O00483	NDUFA4	2	4	46.9	18	0	8.1942	44548000	53240000	77885000	57452000	37952000	63788000	178150000	NDUFA4	343	44548000	53240000	77885000	57452000	37952000	63788000	FALSE	FALSE	FALSE	FALSE	FALSE	FALSE	54215400	63788000	0.849931022	4697	NDUFA4
O75225;A0A024RA40;Q9H3G5;H7C0X5;B3KW79;H7C218	CPVL	10	5	19.7	11	0	12.787	5546600	0	17280000	12041000	7047000	7115700	5088900	CPVL	2695	5546600	1167522.113	17280000	12041000	7047000	7115700	FALSE	TRUE	FALSE	FALSE	FALSE	FALSE	8616424.423	7115700	1.210903273	54504	CPVL
B7Z4K8;E7ETZ4;B3KM68;A0A024RA42;Q9Y6E2;B5MCH7;Q75MG1;E7EMS9;B5MCE7	BZW2	15	14	34.6	49	0	58.802	50088000	82057000	38689000	43981000	39816000	49157000	43578000	BZW2	1062	50088000	82057000	38689000	43981000	39816000	49157000	FALSE	FALSE	FALSE	FALSE	FALSE	FALSE	50926200	49157000	1.035990805	28969	BZW2
A0A024RA49;Q9NQW6;A8K5D9;Q9NQW6-2;B4DSL6	ANLN	7	15	16.1	20	0	43.807	16590000	14268000	5891200	3833500	9616100	73154000	6303700	ANLN	2490	16590000	14268000	5891200	3833500	9616100	73154000	FALSE	FALSE	FALSE	FALSE	FALSE	FALSE	10039760	73154000	0.137241436	54443	ANLN
Q53GF5;A0A024RA52;P25787	PSMA2	7	9	46.6	72	0	305.08	71026000	81053000	94047000	95853000	92174000	94471000	152510000	PSMA2	400	71026000	81053000	94047000	95853000	92174000	94471000	FALSE	FALSE	FALSE	FALSE	FALSE	FALSE	86830600	94471000	0.919124387	5683	PSMA2
B4DLJ7;B2R5R1;A0A024RA55;B4E3D4;Q14956-2;Q14956;B4DLL8;B4DN79;A8K7R3;B4DLL5	GPNMB	14	5	10.9	19	0	17.307	19507000	149990000	85224000	40854000	0	28253000	68383000	GPNMB	779	19507000	149990000	85224000	40854000	1233291.247	28253000	FALSE	FALSE	FALSE	FALSE	TRUE	FALSE	59361658.25	28253000	2.101074514	10457	GPNMB
A4FTY0;A0A024RA58;O60443;A4FVA8;A8K410;H7C3W1	DFNA5	10	8	17.5	21	0	23.156	8420200	15356000	7375300	6583200	4707400	37793000	8402800	DFNA5	2257	8420200	15356000	7375300	6583200	4707400	37793000	FALSE	FALSE	FALSE	FALSE	FALSE	FALSE	8488420	37793000	0.224602969	1687	DFNA5
A0A024RA75;P31937	HIBADH	3	8	32.1	42	0	81.009	17192000	52944000	35981000	19513000	19876000	42723000	39277000	HIBADH	1131	17192000	52944000	35981000	19513000	19876000	42723000	FALSE	FALSE	FALSE	FALSE	FALSE	FALSE	29101200	42723000	0.681160031	11112	HIBADH
B4DKB2;A0A024RAB0;A0A024RAB2;A0A024RAF7;P42892-3;P42892-2;P42892-4;P42892	ECE1	8	4	8.4	11	0	13.625	0	0	3875900	3921200	0	21135000	1725800	ECE1	3474	1564410.203	2080707.368	3875900	3921200	3949069.032	21135000	TRUE	TRUE	FALSE	FALSE	TRUE	FALSE	3078257.321	21135000	0.145647377	1889	ECE1
A0A024RAC0;Q86V48-2;Q86V48-3;Q86V48	LUZP1	7	9	10.7	11	0	17.147	4490100	6586200	0	6566900	7064100	11431000	2197300	LUZP1	3297	4490100	6586200	1942484.96	6566900	7064100	11431000	FALSE	FALSE	TRUE	FALSE	FALSE	FALSE	5329956.992	11431000	0.466272154	7798	LUZP1
A0A024RAC5;Q9P258;A5PLK7	RCC2	3	21	50.6	124	0	120.66	100410000	98951000	157200000	144960000	137460000	124320000	77217000	RCC2	706	100410000	98951000	157200000	144960000	137460000	124320000	FALSE	FALSE	FALSE	FALSE	FALSE	FALSE	127796200	124320000	1.027961712	55920	RCC2
A0A0C4DGS1;A0A024RAD5;P39656;P39656-3;P39656-2;U3KQ84	DDOST	6	13	39.9	67	0	146.38	113050000	128460000	108720000	103290000	120620000	197420000	113550000	DDOST	505	113050000	128460000	108720000	103290000	120620000	197420000	FALSE	FALSE	FALSE	FALSE	FALSE	FALSE	114828000	197420000	0.581643197	1650	DDOST
A0A024RAE1;Q9UKD2	C1orf33;MRTO4	3	11	45.6	26	0	30.337	68350000	74195000	93435000	109290000	110720000	63517000	104700000	C1orf33	548	68350000	74195000	93435000	109290000	110720000	63517000	FALSE	FALSE	FALSE	FALSE	FALSE	FALSE	91198000	63517000	1.435804588	51154	MRTO4
A0A024RAE4;B4E1U9;P60953;A0A024RAE6;B7ZAY4;B4DMH5;P60953-1;Q5JYX0;Q9UJM1;A0A024R9T1	CDC42;hCG_39634	24	7	48.2	72	0	56.012	122410000	134190000	131340000	120290000	93323000	153270000	280930000	CDC42	225	122410000	134190000	131340000	120290000	93323000	153270000	FALSE	FALSE	FALSE	FALSE	FALSE	FALSE	120310600	153270000	0.78495857	998	CDC42
B7Z6Y2;A0A024RAI6;A0A024RAG9;Q9BTH3;A0A024RAG8;A0A024RAE9;B7Z2Z2;A0A024RAI4;A0A024RAI5;Q8WWH9;A0A024RAJ2;A0A024RAJ3;A0A024RAF0;A0A024RAF6;A0A024RAF1;O00499-9;O00499-10;O00499-7;O00499-8;O00499-4;O00499-6;O00499-11;O00499-3;O00499-2;O00499-5;O00499	BIN1	26	2	8.8	3	0	6.1406	0	0	3294800	0	3165300	5915600	1492000	BIN1	3567	2828316.116	1840663.239	3294800	5115807.075	3165300	5915600	TRUE	TRUE	FALSE	TRUE	FALSE	FALSE	3248977.286	5915600	0.549221936	274	BIN1
B8ZWD1;A0A024RAF2;A0A0A0MTI5;B8ZWD9;P07108;P07108-3;P07108-2;P07108-4;P07108-5;B8ZWD8	DBI	11	5	57.7	50	0	81.538	266550000	225110000	140440000	141420000	167590000	111590000	851410000	DBI	63	266550000	225110000	140440000	141420000	167590000	111590000	FALSE	FALSE	FALSE	FALSE	FALSE	FALSE	188222000	111590000	1.686728201	1622	DBI
B4E364;A0A024RAG3;P11234;P11234-3;P11234-2;C9J6B1;C9JQB3	RALB	7	3	29.7	5	0	5.5987	4654400	15224000	0	0	0	3672400	23878000	RALB	1472	4654400	15224000	1771488.817	3077800.37	3437203.519	3672400	FALSE	FALSE	TRUE	TRUE	TRUE	FALSE	5632978.541	3672400	1.533868462	5899	RALB
Q4ZG72;A0A024RAH8;Q9NVP1;Q8N254	DDX18	6	11	23.3	21	0	33.309	24739000	25223000	22812000	33524000	30488000	17509000	14935000	DDX18	1820	24739000	25223000	22812000	33524000	30488000	17509000	FALSE	FALSE	FALSE	FALSE	FALSE	FALSE	27357200	17509000	1.562465018	8886	DDX18
A0A024RAI1;P61158;B4DXW1;B4DT29;Q59FV6;B4DTI0	ACTR3	20	21	65.1	108	0	210.89	140420000	187880000	143560000	162050000	174030000	236970000	150570000	ACTR3	403	140420000	187880000	143560000	162050000	174030000	236970000	FALSE	FALSE	FALSE	FALSE	FALSE	FALSE	161588000	236970000	0.681892223	10096	ACTR3
G5EA06;B4DT94;A0A024RAJ1;Q92552;Q92552-2;D6RH20;D6RJC7;Q6PKB3	MRPS27	11	9	27.4	34	0	50.407	25363000	17973000	16864000	16500000	16268000	21622000	16716000	MRPS27	1729	25363000	17973000	16864000	16500000	16268000	21622000	FALSE	FALSE	FALSE	FALSE	FALSE	FALSE	18593600	21622000	0.859938951	23107	MRPS27
A0A024RAJ5;Q9Y5P4-2;Q9Y5P4;Q9Y5P4-3	COL4A3BP	6	8	16.4	10	0	15.104	9029400	5402800	3462600	0	0	2718500	3416300	COL4A3BP	2990	9029400	5402800	3462600	2001773.613	2184618.645	2718500	FALSE	FALSE	FALSE	TRUE	TRUE	FALSE	4416238.452	2718500	1.624512949	10087	COL4A3BP
A0A024RAJ6;P07686;Q5URX0	HEXB	6	15	30.9	70	0	69.588	91571000	141130000	128860000	91994000	83755000	71944000	72979000	HEXB	743	91571000	141130000	128860000	91994000	83755000	71944000	FALSE	FALSE	FALSE	FALSE	FALSE	FALSE	107462000	71944000	1.493689536	3074	HEXB;HEL-248
A0A024RAL3;Q7Z3T8	ZFYVE16	4	13	12.5	20	0	40.145	36785000	30828000	0	2476600	0	2408800	5115700	ZFYVE16	2690	36785000	30828000	3185127.062	2476600	2698115.293	2408800	FALSE	FALSE	TRUE	FALSE	TRUE	FALSE	15194568.47	2408800	6.307941079	9765	ZFYVE16
A0A024RAM0;Q92973-2;Q92973;Q92973-3	TNPO1	8	17	31.1	61	0	143.53	106730000	104030000	137480000	132890000	150250000	141040000	57512000	TNPO1	875	106730000	104030000	137480000	132890000	150250000	141040000	FALSE	FALSE	FALSE	FALSE	FALSE	FALSE	126276000	141040000	0.895320476	3842	TNPO1
A0A024RAM4;P46821;A2BDK6;Q5H9P1	MAP1B;DKFZp686F1345	18	41	24.8	100	0	198.85	5779000	24990000	61827000	27727000	72584000	156420000	10174000	MAP1B	2103	5779000	24990000	61827000	27727000	72584000	156420000	FALSE	FALSE	FALSE	FALSE	FALSE	FALSE	38581400	156420000	0.246652602	4131	MAP1B;DKFZp686F1345
A0A024RAQ1;P16989;A0A024RAV4;P16989-2;Q96GD7;P16989-3;Q59EB5	CSDA;YBX3	8	5	26.1	23	0	73.058	13068000	28022000	16357000	14937000	13480000	24999000	22588000	CSDA	1507	13068000	28022000	16357000	14937000	13480000	24999000	FALSE	FALSE	FALSE	FALSE	FALSE	FALSE	17172800	24999000	0.686939478	8531	YBX3
B0YJ76;A0A024RAQ3;P00374;B4DM58;P00374-2	DYR;DHFR	8	3	19.3	11	0	6.359	11406000	6506100	5808300	5441400	0	3449100	8990800	DYR	2201	11406000	6506100	5808300	5441400	2049379.003	3449100	FALSE	FALSE	FALSE	FALSE	TRUE	FALSE	6242235.801	3449100	1.809815836	1719	DHFR;DYR
Q53GJ1;Q9H4E3;A0A024RAS3;Q9H0S4-2;Q9H0S4;A4UCU0;B4DYP6	E4-DBP;hCG_27698;DDX47	9	5	15.4	12	0	14.727	11669000	15689000	17782000	21862000	18021000	18129000	11839000	E4-DBP	1976	11669000	15689000	17782000	21862000	18021000	18129000	FALSE	FALSE	FALSE	FALSE	FALSE	FALSE	17004600	18129000	0.937977826	51202	DDX47;E4-DBP
A0A024RAS8;Q9NRV9	HEBP1	3	7	38.6	33	0	46.812	18600000	22354000	26882000	27691000	24768000	70626000	54051000	HEBP1	912	18600000	22354000	26882000	27691000	24768000	70626000	FALSE	FALSE	FALSE	FALSE	FALSE	FALSE	24059000	70626000	0.340653584	50865	HEBP1
A0A024RAV2;P46063	RECQL	8	30	62.9	152	0	197.88	151080000	120110000	1.82E+08	242220000	229500000	138650000	78549000	RECQL	693	151080000	120110000	1.82E+08	242220000	229500000	138650000	FALSE	FALSE	FALSE	FALSE	FALSE	FALSE	184982000	138650000	1.334165164	5965	RECQL
B4DMD3;B4DY34;A0A024RAW9;Q9Y2W2	WBP11	6	6	11	15	0	25.667	10536000	8038400	13706000	12950000	12713000	8242600	8190600	WBP11	2281	10536000	8038400	13706000	12950000	12713000	8242600	FALSE	FALSE	FALSE	FALSE	FALSE	FALSE	11588680	8242600	1.405949579	51729	WBP11
Q6LET6;A0A024RAX2;P10620;F5H7F6;F5H6X2;P10620-2	MGST1	9	4	27.1	30	0	112.35	21775000	0	20427000	44104000	21905000	155840000	172330000	MGST1	350	21775000	1610915.124	20427000	44104000	21905000	155840000	FALSE	TRUE	FALSE	FALSE	FALSE	FALSE	21964383.02	155840000	0.140941883	4257	MGST1
B2RA03;A0A024RAY2;P05783;I6L965;F8VZY9	KRT18	31	17	64.7	31	0	323.31	0	677770	1079800	956890	0	2219700	81798000	KRT18	673	3396085.362	677770	1079800	956890	6842467.919	2219700	TRUE	FALSE	FALSE	FALSE	TRUE	FALSE	2590602.656	2219700	1.167095849	3875	KRT18
F8W6I7;A0A024RB53;A0A024RAZ7;P09651-2;P09651;Q6IPF2;P09651-3;A0A024RC46;F8VZ49;Q9BSM5;Q0VAC0;F8VTQ5;B4E0B5	HNRNPA1;HNRPA1;hCG_2020860	18	7	61.9	68	0	323.31	174900000	201220000	461830000	356080000	503740000	446710000	343960000	HNRNPA1	183	174900000	201220000	461830000	356080000	503740000	446710000	FALSE	FALSE	FALSE	FALSE	FALSE	FALSE	339554000	446710000	0.760121779	3178	HNRNPA1;HNRPA1
B2R627;A8K6A5;A0A024RB01;P08648	ITGA5	5	6	7.5	7	0	13.48	0	0	7246800	0	10019000	22927000	3543600	ITGA5	2969	3170483.889	1689380.051	7246800	1704141.023	10019000	22927000	TRUE	TRUE	FALSE	TRUE	FALSE	FALSE	4765960.993	22927000	0.207875474	3678	ITGA5
B7ZLK2;B7ZLK1;A0A024RB03;Q86YS7;Q86YS7-2;Q86YS7-3;Q86YS7-4;Q86YS7-5	KIAA0528;C2CD5	10	8	9.5	10	0	19.985	21557000	0	58545000	49553000	49239000	16213000	11591000	KIAA0528	1998	21557000	1538092.334	58545000	49553000	49239000	16213000	FALSE	TRUE	FALSE	FALSE	FALSE	FALSE	36086418.47	16213000	2.225770583	9847	KIAA0528;C2CD5
A0A024RB09;P61020;Q6FI54;P61020-2	RAB5B	4	3	33.5	12	0	53.194	49254000	20512000	3433400	1899000	2516200	4223900	28040000	RAB5B	1365	49254000	20512000	3433400	1899000	2516200	4223900	FALSE	FALSE	FALSE	FALSE	FALSE	FALSE	15522920	4223900	3.675020715	5869	RAB5B
A0A024RB14;P62854;Q5JNZ5;Q75MH1	RPS26;RPS26P11	6	5	50.4	56	0	24.362	202590000	194240000	253130000	282160000	249950000	235020000	822780000	RPS26	64	202590000	194240000	253130000	282160000	249950000	235020000	FALSE	FALSE	FALSE	FALSE	FALSE	FALSE	236414000	235020000	1.00593141	101929876	RPS26;RPS26P11
A0A024RB17;A0A024RB16;Q9BSJ8;Q9BSJ8-2;B3KMV5;B3KY56	FAM62A;ESYT1	7	23	28.3	111	0	168.1	113350000	122300000	91968000	77102000	102810000	159230000	43733000	FAM62A	1058	113350000	122300000	91968000	77102000	102810000	159230000	FALSE	FALSE	FALSE	FALSE	FALSE	FALSE	101506000	159230000	0.637480374	23344	FAM62A;ESYT1
Q59G16;A0A024RB22;F8VXC8;Q8TAQ2-2;Q8TAQ2-3;Q8TAQ2;B4DF22	SMARCC2	9	6	13	17	0	43.75	7007800	13859000	4580000	3247100	3603600	15071000	3414100	SMARCC2	2992	7007800	13859000	4580000	3247100	3603600	15071000	FALSE	FALSE	FALSE	FALSE	FALSE	FALSE	6459500	15071000	0.428604605	6601	SMARCC2
A0A024RB32;A0A087WYT3;B3KUY2;Q15185-4;Q15185;Q15185-3;B4DDC6	PTGES3	8	7	41.9	69	0	168.47	256120000	231130000	292610000	280310000	296760000	212440000	470500000	PTGES3	150	256120000	231130000	292610000	280310000	296760000	212440000	FALSE	FALSE	FALSE	FALSE	FALSE	FALSE	271386000	212440000	1.277471286	10728	PTGES3
F8VZJ2;H0YHX9;A0A024RB41;Q13765;E9PAV3-2;E9PAV3;F8W1N5;F8VNW4;F8W0W4;B4DDI8	NACA;hCG_2016482	13	5	47.1	59	0	185.97	188410000	209860000	193280000	190760000	192790000	138360000	553780000	NACA	127	188410000	209860000	193280000	190760000	192790000	138360000	FALSE	FALSE	FALSE	FALSE	FALSE	FALSE	195020000	138360000	1.409511419	4666	NACA
Q53FU3;A0A024RB72;F8VVA7;P61923;P61923-4;F8W651;F8VYZ4;P61923-5;F8VXB1;F8W156;P61923-3	COPZ1	16	7	60.5	26	0	61.743	19924000	21273000	15205000	20134000	18654000	18699000	69935000	COPZ1	763	19924000	21273000	15205000	20134000	18654000	18699000	FALSE	FALSE	FALSE	FALSE	FALSE	FALSE	19038000	18699000	1.018129312	22818	COPZ1
B4DJV2;A0A024RB75;O75390;B3KTN4;A0A0C4DGI3;Q0QEL2	CS	23	7	33.1	55	0	134.07	120890000	67051000	155570000	122290000	120790000	143150000	116420000	CS	493	120890000	67051000	155570000	122290000	120790000	143150000	FALSE	FALSE	FALSE	FALSE	FALSE	FALSE	117318200	143150000	0.819547328	1431	CS
A0A024RB77;G3V5T9;P24941;A0A024RB10;P24941-2;E7ESI2;B4DDL9	CDK2	34	16	72.5	66	0	82.42	325190000	157660000	42352000	54265000	68006000	26383000	161150000	CDK2	375	325190000	157660000	42352000	54265000	68006000	26383000	FALSE	FALSE	FALSE	FALSE	FALSE	FALSE	129494600	26383000	4.908259106	1017	CDK2
A0A024RB85;Q9UQ80;A8K6Y1;Q6PIN5;Q05D08;Q9UQ80-2;F8VR77	PA2G4	10	22	66.2	186	0	264.2	569940000	382010000	418600000	422780000	411630000	317590000	326940000	PA2G4	192	569940000	382010000	418600000	422780000	411630000	317590000	FALSE	FALSE	FALSE	FALSE	FALSE	FALSE	440992000	317590000	1.388557574	5036	PA2G4
A0A024RB87;P61224-3;P61224;A0A0J9YXB3;A6NIZ1;E7ESV4;F5H7Y6;P61224-2;P61224-4;F5H823;B7ZB78;F5GZG1;F5GX62;F5H004;B7ZAY2;Q9BXV4;F5H6R7	RAP1B	26	3	50.5	19	0	98.524	18027000	34505000	17673000	15454000	21649000	41561000	46248000	RAP1B	1025	18027000	34505000	17673000	15454000	21649000	41561000	FALSE	FALSE	FALSE	FALSE	FALSE	FALSE	21461600	41561000	0.51638796	5908	RAP1B
A0A024RB99;V9HW06;Q53ET4;P34897-3;P34897;Q5HYG8;P34897-2;B4E1G2;B4DJQ3;B4DP88;Q5BJF5;B4DW25;B4DJ63;B4DWA7;B4DLV4;H0YIZ0;G3V2Y4	SHMT2;HEL-S-51e;DKFZp686P09201	29	24	67.1	147	0	248.14	329500000	197110000	305400000	303210000	272980000	165290000	171830000	SHMT2	352	329500000	197110000	305400000	303210000	272980000	165290000	FALSE	FALSE	FALSE	FALSE	FALSE	FALSE	281640000	165290000	1.703914332	6472	SHMT2;HEL-S-51e
A0A024RBA9;Q9UL25;Q96GX3	RAB21	3	9	50.2	31	0	48.52	33010000	25929000	24402000	20632000	20772000	30074000	36257000	RAB21	1187	33010000	25929000	24402000	20632000	20772000	30074000	FALSE	FALSE	FALSE	FALSE	FALSE	FALSE	24949000	30074000	0.829587019	23011	RAB21
A0A024RBB5;F8VW96;Q16527;F8VQR7	CSRP2	4	7	46.6	29	0	43.866	17089000	22347000	26361000	15326000	43595000	64330000	54901000	CSRP2	903	17089000	22347000	26361000	15326000	43595000	64330000	FALSE	FALSE	FALSE	FALSE	FALSE	FALSE	24943600	64330000	0.387744443	1466	CSRP2
F8VYH9;F8VTV8;F8VWX7;A0A024RBB6;P11802;F8W1L8;F8VYY1;Q96BE9;F8VXD2;F8VZZ0;F8VZ51;Q6LC83	CDK4	13	5	38.8	7	0	14.032	10252000	6595700	0	0	0	9871200	14960000	CDK4	1818	10252000	6595700	3818030.398	1478569.117	1713328.322	9871200	FALSE	FALSE	TRUE	TRUE	TRUE	FALSE	4771525.567	9871200	0.483378471	1019	CDK4
F8VY35;F5H4R6;H0YIV4;A0A024RBB7;P55209-2;P55209;F8W020;F8W0J6;B7Z2V4;H0YH88;H0YHC3;F8W543;F8VXI6;F8VUX1;B7Z5H0;F8VVB5	NAP1L1	16	1	50.8	9	0	257.67	16220000	0	11937000	13066000	10965000	10946000	17863000	F8VY35	1681	16220000	2795059.485	11937000	13066000	10965000	10946000	FALSE	TRUE	FALSE	FALSE	FALSE	FALSE	10996611.9	10946000	1.00462378	4673	NAP1L1
F8VQX7;Q641R2;A0A024RBB8;Q5HYM3;Q9BZF1-3;Q9BZF1-2;Q9BZF1;F8VUA7;Q96N80	OSBPL8;DKFZp686C0249	13	5	9.4	6	0	14.207	7187300	5484800	7112700	6346400	4945700	5287600	2747000	OSBPL8	3143	7187300	5484800	7112700	6346400	4945700	5287600	FALSE	FALSE	FALSE	FALSE	FALSE	FALSE	6215380	5287600	1.175463348	114882	OSBPL8;DKFZp686C0249
B4DTT0;Q7Z3X3;H7C3P4;A8K6V6;A0A024RBC5;F6S8M0;B4E284;P15586-2;P15586;H0YFA9;F5H4C6	DKFZp686E12166;GNS	12	10	23.5	39	0	29.016	42181000	32708000	60762000	38824000	40628000	46754000	33100000	DKFZp686E12166	1244	42181000	32708000	60762000	38824000	40628000	46754000	FALSE	FALSE	FALSE	FALSE	FALSE	FALSE	43020600	46754000	0.920148009	2799	GNS
A0A024RBD0;Q9NZJ9;B2RE29;A0A024RBG1;Q9NZJ9-2;F8VRL4;F8VRR0;A0A0C4DGJ4;Q96G61;Q8NFP7	NUDT4;NUDT11;NUDT10	11	5	43.9	12	0	14.825	26390000	10897000	14566000	8642300	20256000	5417200	32084000	NUDT4	1269	26390000	10897000	14566000	8642300	20256000	5417200	FALSE	FALSE	FALSE	FALSE	FALSE	FALSE	16150260	5417200	2.981292919	11163	NUDT4;NUDT10;NUDT11
A0A024RBE7;P42167;G5E972;A0A024RBH7;P42167-2;Q59G12;P42167-3	TMPO	9	7	48.7	43	0	36.994	37849000	20422000	44365000	42777000	42042000	39741000	26572000	A0A024RBE7	1409	37849000	20422000	44365000	42777000	42042000	39741000	FALSE	FALSE	FALSE	FALSE	FALSE	FALSE	37491000	39741000	0.943383408	7112	TMPO
Q8NCF7;A0A024RBE8;Q00325-2;F8VVM2;Q53HC3;B2RE88;A0A024RBH9;Q00325	SLC25A3	11	13	41.6	100	0	251.02	503340000	290480000	395180000	327520000	340860000	394500000	346730000	SLC25A3	181	503340000	290480000	395180000	327520000	340860000	394500000	FALSE	FALSE	FALSE	FALSE	FALSE	FALSE	371476000	394500000	0.941637516	5250	SLC25A3
A0A024RBH2;Q07065;B3KVX6;Q8TB01;Q6NWZ1	CKAP4	15	37	65.6	221	0	323.31	371710000	159560000	390880000	260820000	485370000	764070000	176860000	CKAP4	344	371710000	159560000	390880000	260820000	485370000	764070000	FALSE	FALSE	FALSE	FALSE	FALSE	FALSE	333668000	764070000	0.436698208	10970	CKAP4
Q9BV37;Q53FW9;A0A024RBH5;Q13610;B4DNL1;B4DJV5	PWP1	12	7	17.6	16	0	13.316	22134000	8282700	13527000	13575000	24794000	11662000	12566000	PWP1	1939	22134000	8282700	13527000	13575000	24794000	11662000	FALSE	FALSE	FALSE	FALSE	FALSE	FALSE	16462540	11662000	1.411639513	11137	PWP1
Q53G58;B3KN06;A0A024RBI5;Q59EA2;Q9ULV4;Q9ULV4-2;Q9ULV4-3;B4E3S0;B4DMH3;B7Z9V0;H0YHL7	CORO1C	27	23	44.9	171	0	173.79	440560000	251270000	341820000	377390000	354640000	444700000	332140000	CORO1C	188	440560000	251270000	341820000	377390000	354640000	444700000	FALSE	FALSE	FALSE	FALSE	FALSE	FALSE	353136000	444700000	0.794099393	23603	CORO1C
B3KMP2;Q2M2R1;Q4KMX6;A8KAQ7;A5D8X2;A0A024RBJ3;Q9UJX3-2;Q9UJX3;H0YIW2	ANAPC7	9	4	11.5	4	0	7.2643	3669300	1865500	2228800	0	0	0	1142500	ANAPC7	3719	3669300	1865500	2228800	1543317.983	2351888.232	1283365.911	FALSE	FALSE	FALSE	TRUE	TRUE	TRUE	2331761.243	1283365.911	1.81691069	51434	ANAPC7
Q8TBK5;Q8N5Z7;A0A024RBK3;Q9HBB3;Q02878;B2R4K7;B4DRX3	RPL6	14	18	50.3	168	0	323.31	1014300000	870540000	902050000	1015200000	1073400000	785240000	1029700000	RPL6	44	1014300000	870540000	902050000	1015200000	1073400000	785240000	FALSE	FALSE	FALSE	FALSE	FALSE	FALSE	975098000	785240000	1.241783404	6128	RPL6
B7Z2S5;A0A087WSW9;A0A024RBK9;A0A140VKC9;A0A087WSY9;Q16881-4;Q16881-3;Q16881;B2R5P6;F8W809;Q16881-5;Q16881-2;E9PIR7;Q6ZR44;E2QRB9;Q16881-7	TXNRD1	23	1	60	8	0	323.31	1166700	2549400	0	0	0	14953000	2073000	TXNRD1	3346	1166700	2549400	3566675.876	1249174.327	2679714.19	14953000	FALSE	FALSE	TRUE	TRUE	TRUE	FALSE	2242332.878	14953000	0.149958729	7296	TXNRD1
A0A024RBP2;P36873;P36873-2;Q9UPN1;F8VYE8;F8VR82;F8W0W8;A0A087WYY5	PPP1CC	14	4	52.9	12	0	288.36	24601000	19544000	0	0	0	6464000	13860000	PPP1CC	1875	24601000	19544000	1945631.84	3963359.45	3136757.772	6464000	FALSE	FALSE	TRUE	TRUE	TRUE	FALSE	10638149.81	6464000	1.645753374	5501	PPP1CC
A0A024RBR3;O43583;F8VVL1	DENR	3	7	33.3	17	0	53.529	22455000	0	15299000	14202000	15098000	9382200	18928000	DENR	1648	22455000	3361483.933	15299000	14202000	15098000	9382200	FALSE	TRUE	FALSE	FALSE	FALSE	FALSE	14083096.79	9382200	1.501044189	8562	DENR
A8K4Z4;A0A024RBS2;P05388;Q6NSF2;F8VWS0;Q53HW2;Q53HK9;P05388-2;F8VU65;F8VW21;F8VPE8;G3V210;F8VZS0;B4E3D5;F8VQY6;F8VRK7;Q8NHW5;F8VS58;F8VWV4	RPLP0;RPLP0P6	21	14	58	124	0	205.58	627560000	652490000	493810000	543830000	580320000	578330000	779600000	RPLP0	74	627560000	652490000	493810000	543830000	580320000	578330000	FALSE	FALSE	FALSE	FALSE	FALSE	FALSE	579602000	578330000	1.002199436	6175	RPLP0;RPLP0P6
B7ZKQ9;A0A024RBS4;Q8WTV0-4;Q8WTV0-2;B3KW46;B4DZ71;A0A0S2Z3N2;B4E3I1;Q59FM4;Q8WTV0-3;Q8WTV0-5;Q8WTV0;F5H4X0;A0A0S2Z3I2	SCARB1	15	11	24.5	22	0	41.632	20045000	10670000	34885000	28046000	50720000	0	15979000	SCARB1	1772	20045000	10670000	34885000	28046000	50720000	2329217.82	FALSE	FALSE	FALSE	FALSE	FALSE	TRUE	28873200	2329217.82	12.39609269	949	SCARB1
A0A024RBS6;F5H1S9;G8JLB3;E5KMT6;E5KMT5;Q9Y606-2;Q9Y606;F5GY32	PUS1	12	3	9.8	11	0	15.344	5485500	4588700	8253900	7883500	6869300	5691700	4396400	PUS1	2803	5485500	4588700	8253900	7883500	6869300	5691700	FALSE	FALSE	FALSE	FALSE	FALSE	FALSE	6616180	5691700	1.162425989	80324	PUS1
A0A024RBT2;Q502X2;A0A0S2Z5U7;Q9NR28-2;Q9NR28;K7X1S0;A0A0S2Z5P6;Q53HB7;Q9NR28-3;F5H796;F5GX50;F5GXT8	DIABLO	16	7	40.4	27	0	36.616	19151000	17057000	25556000	23124000	21750000	22107000	38547000	DIABLO	1146	19151000	17057000	25556000	23124000	21750000	22107000	FALSE	FALSE	FALSE	FALSE	FALSE	FALSE	21327600	22107000	0.964744199	56616	DIABLO
F5H1F6;F5H4M0;A0A024RBU0;Q9H9H4	VPS37B	4	2	15.8	4	0	4.6972	0	1980500	0	0	2784700	1975000	2307600	VPS37B	3273	1719708.001	1980500	3961263.367	3453422.919	2784700	1975000	TRUE	FALSE	TRUE	TRUE	FALSE	FALSE	2779918.857	1975000	1.407553852	79720	VPS37B
A0A024RBV2;Q86V21;Q86V21-2;Q9H7A6;Q86V21-3	AACS	8	4	7.3	8	0	9.9777	0	0	7209800	3853800	3197500	2454900	968400	AACS	3804	3524706.024	3136309.976	7209800	3853800	3197500	2454900	TRUE	TRUE	FALSE	FALSE	FALSE	FALSE	4184423.2	2454900	1.704518799	65985	AACS
A0A024RBV5;P51151	RAB9A	3	4	26.4	7	0	9.8348	5088400	6733600	6088600	6244400	6771300	4865000	9181000	RAB9A	2188	5088400	6733600	6088600	6244400	6771300	4865000	FALSE	FALSE	FALSE	FALSE	FALSE	FALSE	6185260	4865000	1.271379239	9367	RAB9A
A0A024RBX6;O00625	PIR	2	13	49	35	0	98.139	0	125050000	73243000	113890000	87282000	3797500	59645000	PIR	852	1834495.597	125050000	73243000	113890000	87282000	3797500	TRUE	FALSE	FALSE	FALSE	FALSE	FALSE	80259899.12	3797500	21.13493064	8544	PIR
Q549M9;A0A024RBX8;P56377;Q7Z677;H7BZG6;B7Z853;H0Y673;F6SFB5;A6NH01;B7Z3M9;B4DIM6;P56377-2	AP1S2;DKFZp779P0659	12	2	21	10	0	18.256	4324100	5268400	0	0	8436700	0	6719400	AP1S2	2443	4324100	5268400	2074254.088	2202791.864	8436700	1098907.612	FALSE	FALSE	TRUE	TRUE	FALSE	TRUE	4461249.19	1098907.612	4.059712701	8905	AP1S2
A0A024RBX9;P08559;P08559-4;P08559-3;P08559-2;A5YPB6;Q53GE3;A5PHJ9	PDHA1;PDHA1/LOC79064	20	18	53.3	81	0	88.692	55803000	53264000	103700000	116740000	92544000	81172000	69932000	PDHA1	764	55803000	53264000	103700000	116740000	92544000	81172000	FALSE	FALSE	FALSE	FALSE	FALSE	FALSE	84410200	81172000	1.039893067	5160	PDHA1;PDHA1/LOC79064
A0A024RBY9;P53701;Q68D50	HCCS;DKFZp779I1858	3	9	37.3	24	0	23.158	6759200	17912000	12023000	14422000	24429000	36085000	25461000	HCCS	1436	6759200	17912000	12023000	14422000	24429000	36085000	FALSE	FALSE	FALSE	FALSE	FALSE	FALSE	15109040	36085000	0.418706942	3052	HCCS;DKFZp779I1858
A0A024RC33;Q15555-4;Q15555-5;Q15555-3;Q15555;K7EL66;K7ERD8;Q15555-2	MAPRE2	9	6	24.8	13	0	15.056	12677000	5372000	14766000	12140000	23192000	5809100	9981600	MAPRE2	2118	12677000	5372000	14766000	12140000	23192000	5809100	FALSE	FALSE	FALSE	FALSE	FALSE	FALSE	13629400	5809100	2.346215421	10982	MAPRE2
A0A0C4DGQ6;A0A024RC37;Q96P16;Q96P16-3	RPRD1A;P15RS	5	3	28.4	5	0	4.5847	3556700	0	3268200	3973300	0	2062600	4068600	RPRD1A	2868.5	3556700	1692166.565	3268200	3973300	2236349.802	2062600	FALSE	TRUE	FALSE	FALSE	TRUE	FALSE	2945343.273	2062600	1.427975988	55197	P15RS;RPRD1A
A0A024RC42;P19022-2;P19022	CDH2	10	5	10.6	10	0	13.584	10367000	10534000	7604400	0	0	18060000	5507100	CDH2	2625	10367000	10534000	7604400	2716031.404	929859.1917	18060000	FALSE	FALSE	FALSE	TRUE	TRUE	FALSE	6430258.119	18060000	0.35604973	1000	CDH2
H0YKS8;X6R3G6;A0A024RC59;F5GZN3;B4E396;B3KTQ2;A0A024RC55;Q08431-2;Q08431-3;Q08431;A0A087WUV5	MFGE8	11	3	17.2	6	0	6.0644	3330800	8931300	4638600	0	0	3668000	5672900	MFGE8	2590	3330800	8931300	4638600	2067469.586	1402284.446	3668000	FALSE	FALSE	FALSE	TRUE	TRUE	FALSE	4074090.807	3668000	1.110711779	4240	MFGE8
A4QPB0;A0A024RC65;P46940;A0A0J9YXZ5;H0YLE8;B4E2M0;Q6P1N4	IQGAP1;hCG_1991735	24	72	52.2	395	0	323.31	508930000	552120000	628560000	576900000	629640000	748600000	136110000	IQGAP1	444	508930000	552120000	628560000	576900000	629640000	748600000	FALSE	FALSE	FALSE	FALSE	FALSE	FALSE	579230000	748600000	0.773751002	8826	IQGAP1
H0YNG3;Q6IAM7;A0A024RC78;P67812-4;P67812;P67812-3;H0YNX5;Q7Z4Z6;P67812-2;H0YKT4;H0YNA5	SEC11A;SPC18;SEC11L1	11	5	27.6	16	0	46.906	10643000	23973000	24737000	33904000	23386000	33528000	38762000	SEC11A	1142	10643000	23973000	24737000	33904000	23386000	33528000	FALSE	FALSE	FALSE	FALSE	FALSE	FALSE	23328600	33528000	0.69579456	23478	SEC11A;SEC11L1
A0A024RC95;P47895;B2R5T2;H0Y2X5;Q7Z3A2;B4DYU3	ALDH1A3;DKFZp686G1675	16	23	58	57	0	246.81	0	139090000	29268000	5523600	3469900	956360	43095000	ALDH1A3	1072.5	4407794.683	139090000	29268000	5523600	3469900	956360	TRUE	FALSE	FALSE	FALSE	FALSE	FALSE	36351858.94	956360	38.01064342	220	ALDH1A3
A0A024RCA7;P05387	RPLP2	3	9	80.9	119	0	301.19	720150000	783800000	575390000	608460000	589190000	511180000	2.25E+09	RPLP2	13	720150000	783800000	575390000	608460000	589190000	511180000	FALSE	FALSE	FALSE	FALSE	FALSE	FALSE	655398000	511180000	1.282127626	6181	RPLP2
B2R9J4;A0A024RCB2;A6NJD9;A8MVT4;A8MYK1;Q16540;H7C2P7	MRPL23	7	2	15	9	0	7.6861	5246100	4535900	6788600	7200200	6505100	5962300	11205000	MRPL23	2021	5246100	4535900	6788600	7200200	6505100	5962300	FALSE	FALSE	FALSE	FALSE	FALSE	FALSE	6055180	5962300	1.015577881	6150	MRPL23
E9PMR4;A0A024RCB3;P48509;E9PRJ3;Q53FU5	CD151	5	4	13.9	21	0	85.228	19892000	33177000	9727800	10617000	17525000	78358000	73273000	CD151	738	19892000	33177000	9727800	10617000	17525000	78358000	FALSE	FALSE	FALSE	FALSE	FALSE	FALSE	18187760	78358000	0.23211108	977	CD151
E9PJK1;E9PRJ8;H0YDL9;H0YDJ9;A0A024RCB7;E9PIF1;A6NMH8;P60033	CD81	10	3	35.8	21	0	57.909	9766000	40777000	16393000	21061000	29607000	23731000	93125000	CD81	598	9766000	40777000	16393000	21061000	29607000	23731000	FALSE	FALSE	FALSE	FALSE	FALSE	FALSE	23520800	23731000	0.991142388	975	CD81
A0A024RCC9;B7ZAK9;B7ZB83;Q99733;Q99733-2;B7ZAC7;B4DS05;C9JZI7;C9J6D1;E9PNW0;E9PJJ2;E9PS34;E9PNJ7;A8MXH2;E9PKT8	NAP1L4	19	10	38.9	72	0	143.45	52489000	72747000	78787000	74768000	85190000	66758000	77451000	NAP1L4	704	52489000	72747000	78787000	74768000	85190000	66758000	FALSE	FALSE	FALSE	FALSE	FALSE	FALSE	72796200	66758000	1.090449085	4676	NAP1L4
A8K5B0;A0A024RCF9;Q9UH62	ARMCX3	4	6	18.5	12	0	14.053	9392400	10355000	8437500	9408100	11423000	10959000	9909400	ARMCX3	2126	9392400	10355000	8437500	9408100	11423000	10959000	FALSE	FALSE	FALSE	FALSE	FALSE	FALSE	9803200	10959000	0.894534173	51566	ARMCX3
E9PRM7;A0A0J9YWM3;A0A024RCG2;Q96BI1;Q69YM4	SLC22A18;DKFZp667A184	5	2	5.8	3	0	4.1705	2601600	8911200	0	0	0	1940900	7417100	SLC22A18	2362	2601600	8911200	4943450.734	6837504.561	2807138.234	1940900	FALSE	FALSE	TRUE	TRUE	TRUE	FALSE	5220178.706	1940900	2.689566029	5002	SLC22A18;DKFZp667A184
A0A024RCM3;Q13838;Q13838-2;Q5STU3;A0A0G2JJZ9;B4DP52;A0A140T9X3;F6WLT2;A0A140T9X9;A0A140T996;F6UJC5;A0A140TA18;Q59G92	hCG_2005638;DDX39B	28	9	52.3	80	0	249.25	69746000	82698000	120460000	128880000	108520000	119470000	78963000	hCG_2005638	691	69746000	82698000	120460000	128880000	108520000	119470000	FALSE	FALSE	FALSE	FALSE	FALSE	FALSE	102060800	119470000	0.854279735	7919	DDX39B
A0A024RCN6;P26640;A0A140T936	VARS	10	42	40	174	0	307.71	370190000	167440000	292310000	280920000	280850000	150030000	71165000	VARS	754	370190000	167440000	292310000	280920000	280850000	150030000	FALSE	FALSE	FALSE	FALSE	FALSE	FALSE	278342000	150030000	1.855242285	57176	VARS
B4DYK6;A0A024RCR2;P36915;Q0EFC6;B7ZAS6;B4DNS8;Q6P458;B4DWZ0;A0A140T8Y2;Q96QB8;P36915-2	GNL1;HSR1	14	9	17.2	26	0	22.733	14433000	10900000	14650000	11604000	13211000	15379000	6861000	GNL1	2428	14433000	10900000	14650000	11604000	13211000	15379000	FALSE	FALSE	FALSE	FALSE	FALSE	FALSE	12959600	15379000	0.842681579	2794	GNL1;HSR1
A0A0G2JL47;A0A024RCR6;A0A0G2JK23;P46379-5;P46379-2;P46379;P46379-3;P46379-4	BAT3;BAG6	21	9	11.1	22	0	21.454	13513000	7870900	26746000	24092000	18715000	17786000	8631300	BAT3	2237	13513000	7870900	26746000	24092000	18715000	17786000	FALSE	FALSE	FALSE	FALSE	FALSE	FALSE	18187380	17786000	1.022567188	7917	BAG6;BAT3
B4DMA8;A0A024RCS7;Q9BW19;B4E063	KIFC1	4	2	4.7	2	0.0002656	3.9284	2689400	1923000	0	0	0	1938500	795940	KIFC1	3884	2689400	1923000	2967517.709	1730897.164	2396406.913	1938500	FALSE	FALSE	TRUE	TRUE	TRUE	FALSE	2341444.357	1938500	1.207863997	3833	KIFC1
A0A0G2JKZ1;A0A024RCT1;A2AB90;A0A0G2JH37;A0A0A0MSV9;O15533-2;O15533;O15533-3;Q6P1N7;C9JA35;B7Z4V3	TAPBP	13	3	7.6	4	0	5.027	11893000	13079000	0	0	0	9910700	13690000	TAPBP	1887	11893000	13079000	1926426.26	2370072.605	1610060.958	9910700	FALSE	FALSE	TRUE	TRUE	TRUE	FALSE	6175711.964	9910700	0.623135799	6892	TAPBP
A8YXX5;A4FVA6;A0A024RD08;A0A024RCX4;H0Y8C3;Q8IW90;Q9NZJ7-2;Q9NZJ7;Q9Y374;F6WFU6	PIG60;MTCH1	10	4	14.1	8	0	5.9636	7605200	0	8968300	0	15549000	6131000	5918200	PIG60	2546	7605200	3489919.544	8968300	2697653.797	15549000	6131000	FALSE	TRUE	FALSE	TRUE	FALSE	FALSE	7662014.668	6131000	1.249716958	23787	MTCH1;PIG60
B4DZZ8;A0A087WTX2;B4DVK8;A0A024RCX7;Q92504	SLC39A7	5	1	3.7	9	0	74.928	7760000	0	12716000	12681000	9742800	11037000	16024000	SLC39A7	1770	7760000	1806128.08	12716000	12681000	9742800	11037000	FALSE	TRUE	FALSE	FALSE	FALSE	FALSE	8941185.616	11037000	0.81011014	7922	SLC39A7
A0A024RCX8;Q9Y3C6	PPIL1	2	5	35.5	21	0	13.198	33725000	30053000	25146000	22394000	21502000	25733000	59644000	PPIL1	853	33725000	30053000	25146000	22394000	21502000	25733000	FALSE	FALSE	FALSE	FALSE	FALSE	FALSE	26564000	25733000	1.032293164	51645	PPIL1
A0A024RCZ1;Q8NC56;D6RBV0	LEMD2	6	3	7.8	10	0	10.688	4579400	3564100	3709500	3690600	4673600	4585200	2265400	LEMD2	3281	4579400	3564100	3709500	3690600	4673600	4585200	FALSE	FALSE	FALSE	FALSE	FALSE	FALSE	4043440	4585200	0.881845939	221496	LEMD2
B4DP77;A0A024RD03;P82664;Q9BZS5	MRPS10	4	3	27.5	6	0	7.0804	0	4330000	0	5439000	0	4778100	7445900	MRPS10	2356	2633336.391	4330000	1638844.791	5439000	2291356.731	4778100	TRUE	FALSE	TRUE	FALSE	TRUE	FALSE	3266507.582	4778100	0.683641527	55173	MRPS10
A0A024RD07;Q9BT09;A0A024RCZ2	TNRC5;CNPY3	4	4	21.2	10	0	13.904	12074000	8049500	12715000	0	8383500	10871000	10060000	TNRC5	2112	12074000	8049500	12715000	3153835.167	8383500	10871000	FALSE	FALSE	FALSE	TRUE	FALSE	FALSE	8875167.033	10871000	0.816407601	10695	TNRC5;CNPY3
B4DSD7;E9PFR3;A8K6Y2;A0A024RD11;Q14738-3;Q14738-2;Q14738;Q59EF0;H0Y8C4	PPP2R5D	11	3	19.1	11	0	26.495	0	6128100	10921000	8502600	9060900	10230000	4002500	PPP2R5D	2881	1702574.173	6128100	10921000	8502600	9060900	10230000	TRUE	FALSE	FALSE	FALSE	FALSE	FALSE	7263034.835	10230000	0.70997408	5528	PPP2R5D
A0A024RD15;Q16539;B4E0K5;L7RSM2;Q16539-3;Q16539-2;Q16539-5;Q16539-4;B5TY33	MAPK14	11	6	17.5	10	0	20.288	0	0	6834500	8408400	7088000	5207000	4356800	MAPK14	2816	1446215.882	4372766.86	6834500	8408400	7088000	5207000	TRUE	TRUE	FALSE	FALSE	FALSE	FALSE	5629976.548	5207000	1.081232293	1432	MAPK14
A0A024RD36;Q6DKI1;B7Z4G0;R4GMU7;Q6DKI1-2	RPL7L1	7	3	14.1	15	0	8.2404	11106000	13297000	10386000	13178000	13504000	8252600	13771000	RPL7L1	1882	11106000	13297000	10386000	13178000	13504000	8252600	FALSE	FALSE	FALSE	FALSE	FALSE	FALSE	12294200	8252600	1.489736568	285855	RPL7L1
A0A024RD41;Q9ULC3	RAB23	2	4	21.9	7	0	12.067	2602200	0	3674200	3522300	4334400	12612000	5678000	RAB23	2589	2602200	2600760.113	3674200	3522300	4334400	12612000	FALSE	TRUE	FALSE	FALSE	FALSE	FALSE	3346772.023	12612000	0.265364099	51715	RAB23
A0A024RD78;Q6P1L8	MRPL14	2	3	21.4	8	0	5.828	14631000	13652000	6598700	7773000	5892500	5090700	26529000	MRPL14	1411	14631000	13652000	6598700	7773000	5892500	5090700	FALSE	FALSE	FALSE	FALSE	FALSE	FALSE	9709440	5090700	1.907289764	64928	MRPL14
A0A024RD80;P08238;B4DMA2;B4DGL0	HSP90AB1	10	30	72.7	387	0	323.31	2.50E+09	1593200000	1696900000	1726200000	2186800000	1040700000	904270000	HSP90AB1	54	2.50E+09	1593200000	1696900000	1726200000	2186800000	1040700000	FALSE	FALSE	FALSE	FALSE	FALSE	FALSE	1939620000	1040700000	1.863764774	3326	HSP90AB1
T1WHH0;B2R6K1;A0A024RD82;P22033;A0A0S2Z4X4	MUT	7	4	6.4	4	0	7.5519	8801900	0	4143200	0	2851500	4136300	1756700	MUT	3463	8801900	1675161.599	4143200	2254536.92	2851500	4136300	FALSE	TRUE	FALSE	TRUE	FALSE	FALSE	3945259.704	4136300	0.953813723	4594	MUT
A0A024RD93;P22234;E9PBS1;P22234-2;B4DGX3;D6RF62	PAICS	6	25	61.4	185	0	323.31	408500000	297730000	388960000	476460000	383600000	581960000	394820000	PAICS	169	408500000	297730000	388960000	476460000	383600000	581960000	FALSE	FALSE	FALSE	FALSE	FALSE	FALSE	391050000	581960000	0.671953399	10606	PAICS
A0A024RD99;B7Z2D8;B7Z5F9;B3KP14;H0Y8R1;F5H5I6;B7Z3R7;H0YAK1;B3KW50;Q12849-5;Q12849	GRSF1	12	9	38.7	25	0	24.306	22523000	14380000	18684000	18331000	18527000	12220000	20732000	GRSF1	1572	22523000	14380000	18684000	18331000	18527000	12220000	FALSE	FALSE	FALSE	FALSE	FALSE	FALSE	18489000	12220000	1.513011457	2926	GRSF1
A0A024RDB0;A0AVT1;B3KSS1;A0AVT1-2	UBE1L2;UBA6	8	21	25.6	71	0	70.676	39229000	35118000	47809000	47613000	35559000	56433000	13621000	UBE1L2	1889	39229000	35118000	47809000	47613000	35559000	56433000	FALSE	FALSE	FALSE	FALSE	FALSE	FALSE	41065600	56433000	0.7276877	55236	UBA6;UBE1L2
A8K6V7;A0A024RDB2;A0A024RDE5;Q9UN86-2;Q9UN86;D6RAC7;D6RB17;D6RGJ4;D6RBM9;D6REX8;D6RBR0;D6RE13;D6RBW8	G3BP2	15	10	31.6	48	0	88.1	125100000	61649000	38571000	39703000	51592000	73524000	64303000	G3BP2	817	125100000	61649000	38571000	39703000	51592000	73524000	FALSE	FALSE	FALSE	FALSE	FALSE	FALSE	63323000	73524000	0.861256188	9908	G3BP2
A0A024RDH6;A0A024RDD3;D6REX3;O94979-6;O94979-3;O94979-10;O94979-4;O94979-9;O94979-2;O94979;O94979-8;D6RHZ5;H7BXG7;O94979-7;O94979-5	SEC31L1;SEC31A	26	22	19.9	75	0	65.028	97915000	68955000	69295000	91988000	106810000	111780000	40385000	SEC31L1	1120	97915000	68955000	69295000	91988000	106810000	111780000	FALSE	FALSE	FALSE	FALSE	FALSE	FALSE	86992600	111780000	0.778248345	22872	SEC31A;SEC31L1
A0A024RDE8;Q96HC4;Q96HC4-4;Q96HC4-7;Q96HC4-6;Q4W5K9;H0Y8Y3	PDLIM5;LIM	14	3	53	24	0	81.723	28092000	22020000	10717000	8428200	14569000	69646000	18943000	PDLIM5	1645.5	28092000	22020000	10717000	8428200	14569000	69646000	FALSE	FALSE	FALSE	FALSE	FALSE	FALSE	16765240	69646000	0.240720788	10611	PDLIM5
A0A024RDF4;Q14103-3;A0A024RDF3;Q14103;H0Y8G5;H0YA96;Q14103-4;Q12771;B4DTC3;A0A024RDB4;Q14103-2;D6RAF8	HNRPD;HNRNPD	15	14	52	56	0	162.98	79272000	58608000	207790000	139140000	95439000	271280000	207640000	HNRPD	297	79272000	58608000	207790000	139140000	95439000	271280000	FALSE	FALSE	FALSE	FALSE	FALSE	FALSE	116049800	271280000	0.427786051	3184	HNRPD;HNRNPD
A0A024RDG1;O60763;O60763-2	VDP;USO1	9	21	30.1	61	0	94.462	54033000	61907000	50280000	61874000	46975000	40155000	21084000	VDP	1557	54033000	61907000	50280000	61874000	46975000	40155000	FALSE	FALSE	FALSE	FALSE	FALSE	FALSE	55013800	40155000	1.37003611	8615	USO1;VDP
A0A024RDG6;Q14108;Q14108-2	SCARB2	4	8	22.8	47	0	61.444	39188000	69238000	76714000	60994000	66155000	41060000	54539000	SCARB2	908	39188000	69238000	76714000	60994000	66155000	41060000	FALSE	FALSE	FALSE	FALSE	FALSE	FALSE	62457800	41060000	1.521134925	950	SCARB2
A0A024RDG9;Q9BUT1;A8K5M0;A0A024RDJ8;Q9BUT1-3;Q9BUT1-2	BDH2	12	5	26.5	9	0	12.569	23269000	11870000	19758000	13263000	8672100	9531400	16914000	BDH2	1722	23269000	11870000	19758000	13263000	8672100	9531400	FALSE	FALSE	FALSE	FALSE	FALSE	FALSE	15366420	9531400	1.612189185	56898	BDH2
A0A024RDH2;A0A087WY85;P61077;P61077-2;P61077-3;D6RFM0;D6RAH7;H9KV45;A0A0A0MQU3;P62837-2;P62837;D6RAW0;D6RA11	UBE2D3;UBE2D2	19	3	40.8	8	0	26.076	41793000	36805000	35308000	37152000	36808000	42696000	173020000	UBE2D3	349	41793000	36805000	35308000	37152000	36808000	42696000	FALSE	FALSE	FALSE	FALSE	FALSE	FALSE	37573200	42696000	0.880016863	7323	UBE2D3;UBE2D2
A0A024RDH8;P49207	RPL34	3	7	37.6	35	0	21.976	356260000	274660000	161800000	195990000	186710000	133080000	647720000	RPL34	107	356260000	274660000	161800000	195990000	186710000	133080000	FALSE	FALSE	FALSE	FALSE	FALSE	FALSE	235084000	133080000	1.766486324	6164	RPL34
A0A024RDJ3;Q9NY12-2;Q9NY12	NOLA1;GAR1	3	2	12.4	14	0	8.2867	11711000	14515000	18380000	18129000	15352000	17074000	21195000	NOLA1	1550	11711000	14515000	18380000	18129000	15352000	17074000	FALSE	FALSE	FALSE	FALSE	FALSE	FALSE	15617400	17074000	0.914689001	54433	GAR1;NOLA1
I6L894;A0A024RDK2;Q01484;B7Z636;E9PHW9;A0A024RDI4;Q01484-5;Q01484-2	ANK2	17	2	0.8	8	0	4.8727	18081000	20874000	11898000	8552900	0	9394100	1385200	ANK2	3617	18081000	20874000	11898000	8552900	1699000.32	9394100	FALSE	FALSE	FALSE	FALSE	TRUE	FALSE	12220980.06	9394100	1.300920798	287	ANK2
D6R938;A0A024RDK3;E9PBG7;E9PF82;Q13557-8;Q13557-12;Q13557-9;Q13557-10;Q13557-5;Q13557;Q13557-3;Q13557-6;Q13557-4;Q13557-11;B7Z2B0;Q4G1A8	CAMK2D	35	4	17.3	9	0	15.842	0	0	8513900	11438000	7905600	6738500	5370700	CAMK2D	2651	1252331.718	1420917.562	8513900	11438000	7905600	6738500	TRUE	TRUE	FALSE	FALSE	FALSE	FALSE	6106149.856	6738500	0.906158619	817	CAMK2D
Q59ET3;B2R9K8;A0A024RDL1;P40227;B4DPJ8;A1JUI8;P40227-2	CCT6A	10	10	49.1	86	0	232.62	132120000	164400000	154880000	199940000	211570000	144420000	106670000	CCT6A	541	132120000	164400000	154880000	199940000	211570000	144420000	FALSE	FALSE	FALSE	FALSE	FALSE	FALSE	172582000	144420000	1.195000692	908	CCT6A
C9JBI3;A0A024RDL3;P78330;Q53EY1;A0A024RDL9	PSPH	7	9	52.9	19	0	31.643	66468000	0	12138000	12822000	16743000	17919000	38782000	PSPH	1141	66468000	1228889.262	12138000	12822000	16743000	17919000	FALSE	TRUE	FALSE	FALSE	FALSE	FALSE	21879977.85	17919000	1.221049046	5723	PSPH
Q6XYD2;B4DU69;A0A0S2Z3B0;A0A0S2Z316;A0A024RDL8;P04424-3;P04424-2;P04424	ASL	9	4	49	9	0	10.829	0	8697500	5015700	0	3981000	8940700	12741000	ASL	1927	1307945.655	8697500	5015700	943935.864	3981000	8940700	TRUE	FALSE	FALSE	TRUE	FALSE	FALSE	3989216.304	8940700	0.446186127	435	ASL
A0A024RDM2;V9HWG2;Q9Y2S2-2;Q9Y2S2;A0A087WW38	CRYL1;HEL30	6	6	23.6	16	0	32.878	0	6029100	20336000	28457000	14362000	0	6148400	CRYL1	2507	1055581.347	6029100	20336000	28457000	14362000	1731933.389	TRUE	FALSE	FALSE	FALSE	FALSE	TRUE	14047936.27	1731933.389	8.111129654	51084	CRYL1;HEL30
A0A024RDP4;B4DWI8;Q8WXF1-2;Q8WXF1;X6RDA4	PSPC1	5	9	26.7	61	0	63.876	80313000	51256000	25929000	35889000	42608000	72434000	72360000	PSPC1	748	80313000	51256000	25929000	35889000	42608000	72434000	FALSE	FALSE	FALSE	FALSE	FALSE	FALSE	47199000	72434000	0.651613883	55269	PSPC1
A0A024RDQ8;P40938;Q5U0C2;Q53HK8;B4DKE6;P40938-2	RFC3	7	10	36.5	35	0	67.924	27586000	18787000	17489000	21372000	27845000	28350000	18918000	RFC3	1650	27586000	18787000	17489000	21372000	27845000	28350000	FALSE	FALSE	FALSE	FALSE	FALSE	FALSE	22615800	28350000	0.79773545	5983	RFC3
B2R728;A0A024RDQ9;P30825;A0A0A8K9B7	SLC7A1	7	4	6.7	11	0	15.834	10427000	9831600	0	8843100	15336000	0	9030200	SLC7A1	2194	10427000	9831600	1421035.013	8843100	15336000	2269055.052	FALSE	FALSE	TRUE	FALSE	FALSE	TRUE	9171747.003	2269055.052	4.042099814	6541	SLC7A1
Q5T7C4;B7Z965;Q59GW1;A0A024RDR0;P09429;B3KQ05;B2RPK0;D3DQY9	HMGB1;HMGB1P1;hCG_1991922	10	10	59.5	115	0	181.36	315240000	642770000	478450000	379050000	522810000	410340000	1418600000	HMGB1	25	315240000	642770000	478450000	379050000	522810000	410340000	FALSE	FALSE	FALSE	FALSE	FALSE	FALSE	467664000	410340000	1.139698786	3146	HMGB1;HMGB1P1
V9HWJ7;Q53FI1;A0A024RDT4;P13796;Q59GX5	HEL-S-37;LCP1	9	16	46.9	21	0	138.99	0	2043000	0	178260000	3076800	9475800	6486300	HEL-S-37	2466	3402850.943	2043000	1483541.873	178260000	3076800	9475800	TRUE	FALSE	TRUE	FALSE	FALSE	FALSE	37653238.56	9475800	3.973621073	3936	HEL-S-37;LCP1
A0A024RDV5;A0A024RDT9;Q9Y2H6-2;Q9Y2H6;G5E9X3	FNDC3A	6	3	3.7	5	0	7.4307	0	4010300	0	2808300	2788900	2486100	911620	FNDC3A	3828	2959408.277	4010300	1199683.315	2808300	2788900	2486100	TRUE	FALSE	TRUE	FALSE	FALSE	FALSE	2753318.318	2486100	1.107484944	22862	FNDC3A
A0A024RDU9;P13984	GTF2F2	2	7	40.2	11	0	24.376	7050900	12850000	11947000	15384000	19933000	14895000	10551000	GTF2F2	2073	7050900	12850000	11947000	15384000	19933000	14895000	FALSE	FALSE	FALSE	FALSE	FALSE	FALSE	13432980	14895000	0.901844914	2963	GTF2F2
B4DRB3;B4DTN0;A0A024RDV3;Q59HH0;P06400	RB1	6	5	6.1	8	0	16.456	7954200	9027300	2800500	4040000	6168700	0	2096700	RB1	3335	7954200	9027300	2800500	4040000	6168700	2033563.545	FALSE	FALSE	FALSE	FALSE	FALSE	TRUE	5998140	2033563.545	2.94957097	5925	RB1
A0A024RDV7;O00505;Q8IYQ9;Q53F09	KPNA3	5	7	29.6	10	0	20.935	9045400	14790000	7629100	0	12970000	6357700	9188900	KPNA3	2187	9045400	14790000	7629100	1418905.256	12970000	6357700	FALSE	FALSE	FALSE	TRUE	FALSE	FALSE	9170681.051	6357700	1.442452625	3839	KPNA3
A8K6Q9;A0A024RDV9;Q8N0X7;B4DXT5;B3KML8	SPG20	7	7	15.6	27	0	47.782	23486000	31345000	11786000	21425000	25510000	10425000	12325000	SPG20	1953	23486000	31345000	11786000	21425000	25510000	10425000	FALSE	FALSE	FALSE	FALSE	FALSE	FALSE	22710400	10425000	2.178455635	23111	SPG20
A0A024RDW8;P08572;B4DH43	COL4A2	3	6	5.6	18	0	15.375	4513000	10487000	16539000	10979000	18500000	30208000	2294200	COL4A2	3278	4513000	10487000	16539000	10979000	18500000	30208000	FALSE	FALSE	FALSE	FALSE	FALSE	FALSE	12203600	30208000	0.403985699	1284	COL4A2
A0A024RDY0;H0Y8C6;O00410;O00410-3;O00410-2;B4E0R6;B3KWG6	RANBP5;IPO5	24	39	50.6	214	0	323.31	146890000	284860000	200190000	256380000	245590000	285240000	83856000	RANBP5	660	146890000	284860000	200190000	256380000	245590000	285240000	FALSE	FALSE	FALSE	FALSE	FALSE	FALSE	226782000	285240000	0.795056794	3843	IPO5
B3KRY3;A0A024RDY3;P11279;P11279-2	LAMP1	5	7	17	41	0	102.11	83243000	306540000	191870000	218510000	146240000	198860000	178510000	LAMP1	340	83243000	306540000	191870000	218510000	146240000	198860000	FALSE	FALSE	FALSE	FALSE	FALSE	FALSE	189280600	198860000	0.951828422	3916	LAMP1
A0A024RDY7;U4PSC4;Q9NPJ6;Q5T911;Q9NPJ6-2	MED4	5	2	11.1	11	0	6.9376	3147400	2926000	2117200	2208800	1795300	2577000	3138800	MED4	3063	3147400	2926000	2117200	2208800	1795300	2577000	FALSE	FALSE	FALSE	FALSE	FALSE	FALSE	2438940	2577000	0.946426077	29079	MED4
A0A024RDY9;B1ALK7;B7Z6G2;Q14155-1;Q14155-5	ARHGEF7	18	4	6	12	0	32.599	3586700	5874600	8119500	6578200	4091700	5299100	2378900	ARHGEF7	3253	3586700	5874600	8119500	6578200	4091700	5299100	FALSE	FALSE	FALSE	FALSE	FALSE	FALSE	5650140	5299100	1.066245211	8874	ARHGEF7
A0A024RDZ9;A8K097;A0A024RE04;Q5JVF3-3;Q5JVF3-2;Q5JVF3;Q5JVF3-4	RP11-98F14.6;PCID2	7	5	19.9	12	0	12.654	6237100	11894000	8816300	9003100	11152000	7031300	6526600	RP11-98F14.6	2462	6237100	11894000	8816300	9003100	11152000	7031300	FALSE	FALSE	FALSE	FALSE	FALSE	FALSE	9420500	7031300	1.339794917	55795	RP11-98F14.6;PCID2
A0A024RE27;Q96GK7	FAHD2A	5	3	42	14	0	46.782	13974000	6142100	14622000	14908000	11618000	6597200	13382000	FAHD2A	1896	13974000	6142100	14622000	14908000	11618000	6597200	FALSE	FALSE	FALSE	FALSE	FALSE	FALSE	12252820	6597200	1.857275814	51011	FAHD2A
Q59GN8;Q59GM6;H0YBP1;A0A059VC25;Q658W2;E7ESA6;Q05397-7;Q05397;Q05397-5;I6L996;E9PEI4;Q8N9D7;H0YB16;B4DH13;H0YBZ1;Q05397-2;A0A024R9H6	PTK2;FAK;DKFZp666O0110	25	5	5.3	8	0	10.272	6072300	5439700	9173400	7641100	7863000	6849300	1657600	PTK2	3503	6072300	5439700	9173400	7641100	7863000	6849300	FALSE	FALSE	FALSE	FALSE	FALSE	FALSE	7237900	6849300	1.056735725	5747	PTK2;DKFZp666O0110
A0A0G2JNZ5;B7Z7G9;B7Z6E6;D3DV87;B2R6A7;A0A0G2JLB3;A0A068F658;B7Z6S9;P04062-4;P04062-2;P04062;B7Z731;A0A0G2JNZ0;P04062-5;A0A068FB60;A0A068F753;A0A068F579;P04062-3	GBA	23	9	19.2	28	0	20.075	42842000	30888000	35635000	29927000	36900000	34233000	30439000	GBA	1295	42842000	30888000	35635000	29927000	36900000	34233000	FALSE	FALSE	FALSE	FALSE	FALSE	FALSE	35238400	34233000	1.029369322	2629	GBA
A0A068F7M9;Q9Y613;B4DVN5	FHOD1	6	13	13.7	19	0	30.077	6623300	11409000	20203000	17947000	30332000	6553800	2945400	FHOD1	3103	6623300	11409000	20203000	17947000	30332000	6553800	FALSE	FALSE	FALSE	FALSE	FALSE	FALSE	17302860	6553800	2.640126339	29109	FHOD1
A8K670;A0A075B6F9;Q9Y314;M0R3B2	NOSIP	9	5	22.6	5	0	8.3464	6197300	0	6100400	8190700	6653700	11820000	6379700	NOSIP	2480	6197300	1283946.101	6100400	8190700	6653700	11820000	FALSE	TRUE	FALSE	FALSE	FALSE	FALSE	5685209.22	11820000	0.480982168	51070	NOSIP
A0A075B746;P82921	MRPS21	2	2	29.9	4	0	6.0712	4804100	7172100	0	3092900	0	0	15037000	MRPS21	1817	4804100	7172100	3825565.841	3092900	2670698.059	2748288.745	FALSE	FALSE	TRUE	FALSE	TRUE	TRUE	4313072.78	2748288.745	1.569366679	54460	MRPS21
A0A075B785;Q9P260;Q9P260-2	KIAA1468	3	2	2.4	7	0	5.0837	0	2386200	1876800	1402200	1785800	3073100	826260	KIAA1468	3867	1876019.293	2386200	1876800	1402200	1785800	3073100	TRUE	FALSE	FALSE	FALSE	FALSE	FALSE	1865403.859	3073100	0.607010465	57614	KIAA1468
A0A075B7B5;B7ZM87;A2RUF3;O75044;B1AKK3;B7Z3G4;P0DMP2;P0DJJ0;A0A075B7C8;A0A075B743;Q5VZB5	SRGAP2;RP3-365I19.1-001;SRGAP2B;SRGAP2C	16	4	5.2	5	0	7.8379	3260300	2618000	0	0	0	2327600	1268500	SRGAP2	3672	3260300	2618000	3331355.005	2824895.071	1308677.863	2327600	FALSE	FALSE	TRUE	TRUE	TRUE	FALSE	2668645.588	2327600	1.146522421	23380	SRGAP2;SRGAP2B;SRGAP2C
V9HW75;A0A087WSV8;P80303-2;P80303;E9PKG6;Q2L696;E9PLR0;E9PLE9	HEL-S-109;NUCB2;Nucb2	16	7	19	24	0	20.193	22623000	24502000	17433000	17997000	24345000	39994000	21494000	HEL-S-109	1544	22623000	24502000	17433000	17997000	24345000	39994000	FALSE	FALSE	FALSE	FALSE	FALSE	FALSE	21380000	39994000	0.534580187	4925	NUCB2;HEL-S-109;Nucb2
A0A087X2I2;A0A087WT12;K7EJ20;P36969-2;P36969;K7ERP4;K7EKX7;K7ENB4;Q6PI42;A0A087X247;R4GNE4;A0A0A0MTT1	GPX4	13	6	31.1	16	0	24.134	27164000	17462000	7847000	10714000	12506000	16339000	28843000	GPX4	1340.5	27164000	17462000	7847000	10714000	12506000	16339000	FALSE	FALSE	FALSE	FALSE	FALSE	FALSE	15138600	16339000	0.926531611	2879	GPX4
A0A087WT20;Q9NV06;B3KME9	DCAF13	4	4	8.4	8	0	20.272	3572200	5243900	0	6565500	7904300	0	2573000	DCAF13	3195	3572200	5243900	2120763.717	6565500	7904300	1866915.549	FALSE	FALSE	TRUE	FALSE	FALSE	TRUE	5081332.743	1866915.549	2.721779646	25879	DCAF13
A0A087WTA5;E7ERK9;Q9UI10-3;Q9UI10;Q9UI10-2;Q9Y3W7;Q71US4	EIF2B4;DKFZp586J0119	13	10	27.3	19	0	22.218	10492000	10566000	19005000	22658000	16182000	11287000	10670000	EIF2B4	2062	10492000	10566000	19005000	22658000	16182000	11287000	FALSE	FALSE	FALSE	FALSE	FALSE	FALSE	15780600	11287000	1.398121733	8890	EIF2B4;DKFZp586J0119
A0A087WTP3;Q92945;B4DV73;M0R0I5	KHSRP	9	25	42.6	163	0	144.67	229760000	233710000	286700000	252410000	229450000	272530000	126710000	KHSRP	466	229760000	233710000	286700000	252410000	229450000	272530000	FALSE	FALSE	FALSE	FALSE	FALSE	FALSE	246406000	272530000	0.904142663	8570	KHSRP
A0A087WVR3;A0A087WTW0;Q96T88;Q96T88-2;A0A087WWG9	UHRF1	7	9	13.9	16	0	19.908	8374200	8227700	6111300	6296700	18217000	25114000	6302600	UHRF1	2491	8374200	8227700	6111300	6296700	18217000	25114000	FALSE	FALSE	FALSE	FALSE	FALSE	FALSE	9445380	25114000	0.376100183	29128	UHRF1
B4DH58;A0A087WU53;Q9H0U3;A8MUP5;Q96SP2;Q9H0U3-2	MAGT1	6	6	16.9	13	0	12.391	14028000	15042000	15024000	21537000	13747000	28386000	19490000	MAGT1	1621	14028000	15042000	15024000	21537000	13747000	28386000	FALSE	FALSE	FALSE	FALSE	FALSE	FALSE	15875600	28386000	0.559275699	84061	MAGT1
B7Z5E4;A0A087WU65;B7Z360;Q9NRW7;B7Z7G7;A0AR27;Q5T4Q0;B7Z1J7;B7Z5D4;Q9NRW7-2	VPS45	10	6	18.4	21	0	29.463	10294000	12166000	10438000	9195000	8766700	10574000	7081800	VPS45	2398	10294000	12166000	10438000	9195000	8766700	10574000	FALSE	FALSE	FALSE	FALSE	FALSE	FALSE	10171940	10574000	0.961976546	11311	VPS45
A0A087WUB9;Q8WYA6-3;Q8WYA6-2;Q8WYA6-4;Q8WYA6	CTNNBL1	5	5	9	10	0	6.9432	8851800	5916400	6842700	8917000	8642900	10800000	5430200	CTNNBL1	2641	8851800	5916400	6842700	8917000	8642900	10800000	FALSE	FALSE	FALSE	FALSE	FALSE	FALSE	7834160	10800000	0.725385185	56259	CTNNBL1
B4DDB9;A0A087WUC6;E9PI68;Q15005;E9PL01;E9PRB9	SPCS2	7	8	39.4	28	0	31.86	38915000	32426000	36184000	48558000	46361000	40263000	66286000	SPCS2	792	38915000	32426000	36184000	48558000	46361000	40263000	FALSE	FALSE	FALSE	FALSE	FALSE	FALSE	40488800	40263000	1.005608127	9789	SPCS2
A0A087WUQ6;Q7L4Q3;P07203;Q6NSD4	GPX1	5	8	48.5	13	0	20.738	0	15258000	10564000	0	11287000	59267000	22212000	GPX1	1520	2319809.083	15258000	10564000	2414578.151	11287000	59267000	TRUE	FALSE	FALSE	TRUE	FALSE	FALSE	8368677.447	59267000	0.141202987	2876	GPX1
E7ETK0;A0A087WUS0;P62847-2;P62847-3;P62847;P62847-4	RPS24	6	6	41.2	41	0	65.608	54773000	45298000	82557000	86646000	82680000	63470000	193240000	RPS24	315	54773000	45298000	82557000	86646000	82680000	63470000	FALSE	FALSE	FALSE	FALSE	FALSE	FALSE	70390800	63470000	1.109040492	6229	RPS24
Q8N5A0;A0A087WUT6;O60841;B3KM86;D3DVI5	EIF5B	7	24	24.5	66	0	109.09	87894000	83027000	62157000	71229000	86332000	58346000	26830000	EIF5B	1395	87894000	83027000	62157000	71229000	86332000	58346000	FALSE	FALSE	FALSE	FALSE	FALSE	FALSE	78127800	58346000	1.339042951	9669	EIF5B
D3DWY2;D3DWY0;A0A087X0G7;A0A087WUW6;A0A087X1B1;Q9Y6K9;Q9Y6K9-2;Q9Y6K9-3	IKBKG	8	2	10.7	5	0	4.5471	2008700	2205600	0	0	0	2104400	2040400	IKBKG	3354	2008700	2205600	2617282.67	1627369.049	2815813.033	2104400	FALSE	FALSE	TRUE	TRUE	TRUE	FALSE	2254952.951	2104400	1.071541984	8517	IKBKG
A0A087WUX8;A0A087WYF7;Q6UXV4;Q68DW4	APOOL;DKFZp779P1227	4	2	9.9	5	0	4.7688	3144000	2814000	3651700	0	0	0	3747300	APOOL	2932	3144000	2814000	3651700	2309548.272	2677733.132	2401343.153	FALSE	FALSE	FALSE	TRUE	TRUE	TRUE	2919396.281	2401343.153	1.215734735	139322	APOOL;DKFZp779P1227
Q6IB68;A0A087WV05;Q99417	MYCBP	4	4	45.6	8	0	9.0376	8207400	6248200	7879900	7980900	6122800	6215000	19727000	MYCBP	1612	8207400	6248200	7879900	7980900	6122800	6215000	FALSE	FALSE	FALSE	FALSE	FALSE	FALSE	7287840	6215000	1.172621078	26292	MYCBP
Q5T123;Q86Z22;A0A087WV23;D3DPK5;Q9H299	SH3BGRL3;HEL-S-297	5	4	42	37	0	209.65	108440000	208530000	155280000	103550000	135200000	163110000	502200000	SH3BGRL3	139	108440000	208530000	155280000	103550000	135200000	163110000	FALSE	FALSE	FALSE	FALSE	FALSE	FALSE	142200000	163110000	0.871804304	83442	SH3BGRL3;HEL-S-297
A0A087WV66;P46013;P46013-2	MKI67	5	33	15.5	57	0	66.685	44716000	28089000	18926000	30476000	51126000	23516000	3290800	MKI67	3023	44716000	28089000	18926000	30476000	51126000	23516000	FALSE	FALSE	FALSE	FALSE	FALSE	FALSE	34666600	23516000	1.474170777	4288	MKI67
A0A087WV73;P46087;P46087-4;P46087-2;P46087-3	NOP2	11	12	17	30	0	44	26017000	33256000	26016000	37160000	30493000	23718000	14724000	NOP2	1830	26017000	33256000	26016000	37160000	30493000	23718000	FALSE	FALSE	FALSE	FALSE	FALSE	FALSE	30588400	23718000	1.289670293	4839	NOP2
J3QS48;I3L295;J3KTK8;Q96N63;Q96K24;J3QQZ4;J3KT75;B4DMY7;J3QW43;J3QRD5;Q9H3L2;B2RB74;A0A0S2Z4W8;B4DLH7;Q1HDL3;A0A087WV81;O75352-2;O75352;J3KSI4;I3L405;I3L261;I3L1D2;A0A0S2Z4T4;I3L4E0	MPDU1;HBEBP2BPA	24	2	23.8	15	0	6.194	10391000	5467700	14610000	9971100	8690600	13169000	43065000	MPDU1	1075	10391000	5467700	14610000	9971100	8690600	13169000	FALSE	FALSE	FALSE	FALSE	FALSE	FALSE	9826080	13169000	0.746152327	9526	MPDU1;HBEBP2BPA
B4DED6;B4DW97;A0A087WVC1;K0J110;Q9BQ39;Q53FI9	DDX50;mcdrh	7	4	12.1	8	0	9.7635	5952200	7221800	0	0	0	9223400	2714500	DDX50	3155.5	5952200	7221800	1989929.869	1716535.995	2475957.489	9223400	FALSE	FALSE	TRUE	TRUE	TRUE	FALSE	3871284.671	9223400	0.419724253	79009	DDX50;mcdrh
A0A087WVM4;B7ZM99;Q6UB35;B2RD24	MTHFD1L	11	11	14.2	18	0	24.736	8106600	10701000	6204800	8735400	7562100	11503000	4387700	MTHFD1L	2806	8106600	10701000	6204800	8735400	7562100	11503000	FALSE	FALSE	FALSE	FALSE	FALSE	FALSE	8261980	11503000	0.718245675	25902	MTHFD1L
A0A087WVQ6;Q00610-2;Q00610	CLTC	14	59	55.3	531	0	323.31	1.06E+09	1195600000	921560000	935010000	1189800000	1336800000	251740000	CLTC	251	1.06E+09	1195600000	921560000	935010000	1189800000	1336800000	FALSE	FALSE	FALSE	FALSE	FALSE	FALSE	1060394000	1336800000	0.793233094	1213	CLTC
A0A087WVZ9;E5KT65;P19388;B4DJ89;A0A087WWX0;A0A0A0MQR7	POLR2E	7	4	27.2	12	0	36.866	11372000	13228000	12412000	11551000	13904000	9936400	20022000	POLR2E	1599	11372000	13228000	12412000	11551000	13904000	9936400	FALSE	FALSE	FALSE	FALSE	FALSE	FALSE	12493400	9936400	1.257336661	5434	POLR2E
B4DP28;F8W8R3;A0A087WWF6;P49005;C9JLE1	POLD2	9	3	9.7	7	0	9.048	0	0	2887700	4102500	4317800	3530200	2807600	POLD2	3131	1759233.516	1034286.98	2887700	4102500	4317800	3530200	TRUE	TRUE	FALSE	FALSE	FALSE	FALSE	2820304.099	3530200	0.798907739	5425	POLD2
A0A087WWM0;O43617;O43617-2;A0A087WYS5	TRAPPC3	5	5	23.4	7	0	7.6999	0	13865000	0	9924200	10035000	0	17087000	TRAPPC3	1718	5914814.386	13865000	6615513.57	9924200	10035000	3118641.813	TRUE	FALSE	TRUE	FALSE	FALSE	TRUE	9270905.591	3118641.813	2.972738181	27095	TRAPPC3
B4DY46;O00184;A0A087WWS7;Q53GF4;Q15833-2;Q15833;Q15833-3;M0R0M7	STXBP2	14	6	14.5	18	0	19.556	4254700	3028700	9001400	8274900	7446500	3509100	3178700	STXBP2	3055	4254700	3028700	9001400	8274900	7446500	3509100	FALSE	FALSE	FALSE	FALSE	FALSE	FALSE	6401240	3509100	1.824182839	6813	STXBP2
A0A087WXI1;A0A140VJL0;Q6NVY1;Q6NVY1-2	HIBCH	10	5	13.7	7	0	9.8812	4998500	4856500	7697600	5616400	4742800	2706400	3976000	HIBCH	2886	4998500	4856500	7697600	5616400	4742800	2706400	FALSE	FALSE	FALSE	FALSE	FALSE	FALSE	5582360	2706400	2.062651493	26275	HIBCH
A0A087WXS7;O43681;B4DEE5	ASNA1	4	9	37.5	49	0	63.094	47353000	41258000	35887000	33942000	54496000	47769000	51437000	ASNA1	946	47353000	41258000	35887000	33942000	54496000	47769000	FALSE	FALSE	FALSE	FALSE	FALSE	FALSE	42587200	47769000	0.891523792	439	ASNA1
H7BXI1;A0A087WXU3;A0FGR8-2;A0FGR8;A0FGR8-6;A0FGR8-5;A0FGR8-4	ESYT2	7	10	15.4	22	0	39.366	7736900	19796000	6573600	0	0	20290000	3888200	ESYT2	2904	7736900	19796000	6573600	2688648.816	2427571.345	20290000	FALSE	FALSE	FALSE	TRUE	TRUE	FALSE	7844544.032	20290000	0.386621194	57488	ESYT2
A0A087WXZ3;B5BU99;Q9Y5A9;Q9Y5A9-2	YTHDF2	7	6	20	12	0	27.252	14619000	19705000	11419000	11031000	12109000	7523200	16443000	YTHDF2	1743	14619000	19705000	11419000	11031000	12109000	7523200	FALSE	FALSE	FALSE	FALSE	FALSE	FALSE	13776600	7523200	1.83121544	51441	YTHDF2
A0A087WY55;Q9NP79;Q5TGM0;Q9NP79-2;Q9C063	VTA1	5	6	31.1	11	0	27.248	11622000	10538000	12011000	16204000	11424000	26381000	19411000	VTA1	1624	11622000	10538000	12011000	16204000	11424000	26381000	FALSE	FALSE	FALSE	FALSE	FALSE	FALSE	12359800	26381000	0.468511429	51534	VTA1
A0A087WY71;E9PFW3;B4DNB9;Q96CW1-2;Q96CW1;B4E304;B4DFM1;B4DJB1;C9JJ47;B4DTI4	AP2M1	16	17	44.2	80	0	71.576	59247000	71822000	91184000	83639000	84474000	128550000	58460000	AP2M1	865	59247000	71822000	91184000	83639000	84474000	128550000	FALSE	FALSE	FALSE	FALSE	FALSE	FALSE	78073200	128550000	0.607337223	1173	AP2M1
A0A087WY88;Q8N5M9;Q9BY51	JAGN1	3	2	13.3	17	0	6.5325	9659500	10825000	10233000	8922200	8914300	8971200	25217000	JAGN1	1441	9659500	10825000	10233000	8922200	8914300	8971200	FALSE	FALSE	FALSE	FALSE	FALSE	FALSE	9710800	8971200	1.082441591	84522	JAGN1
Q5JNW1;A0A087WYD6;X5CMH5;Q59H06;Q03519;Q9UMW6;Q9UQ60;Q9UP03;A0A0G2JLV0;E7ENX8;Q03519-2;A0A140T9S0;B4DS72	TAP2;TAP2-G	17	3	5.2	3	0	7.5877	3448500	2004900	3020800	0	0	1607200	1078400	TAP2	3743	3448500	2004900	3020800	1324911.325	2687977.767	1607200	FALSE	FALSE	FALSE	TRUE	TRUE	FALSE	2497417.818	1607200	1.553893615	6891	TAP2;TAP2-G
A0A087WYN9;Q7Z478	DHX29	3	4	3.9	7	0	8.8225	4083900	3811200	0	0	0	2714100	710440	DHX29	3930	4083900	3811200	1664688.928	2833555.747	1824014.12	2714100	FALSE	FALSE	TRUE	TRUE	TRUE	FALSE	2843471.759	2714100	1.047666541	54505	DHX29
A0A087WYP2;Q8IZQ5;H0YE28	C11orf31;SELH	4	3	24	6	0	15.762	9458200	10457000	0	0	0	8224700	26069000	C11orf31	1420	9458200	10457000	2282544.316	2695675.21	2288081.576	8224700	FALSE	FALSE	TRUE	TRUE	TRUE	FALSE	5436300.22	8224700	0.660972463	280636	SELENOH
A0A087WYR0;P09132;A0A087WWU9	SRP19	3	2	24.2	13	0	21.386	7891700	7819900	4021100	0	4629900	4448800	18800000	SRP19	1656	7891700	7819900	4021100	2494089.089	4629900	4448800	FALSE	FALSE	FALSE	TRUE	FALSE	FALSE	5371337.818	4448800	1.207367789	6728	SRP19
Q6FGS1;A0A087WYR3;O43399;O43399-5;O43399-7;Q53GA0;Q5J908;A0A087WZ51;B4DDV4	TPD52L2	9	2	59.2	19	0	201.75	18126000	24988000	21023000	18665000	18347000	55297000	38999000	TPD52L2	1137	18126000	24988000	21023000	18665000	18347000	55297000	FALSE	FALSE	FALSE	FALSE	FALSE	FALSE	20229800	55297000	0.365839015	7165	TPD52L2
A0A087WYU1;B2RAU5;Q9Y5X1;B3KXH8;Q59ES5	SNX9	8	14	34.7	35	0	65.421	11059000	64695000	28289000	35414000	18831000	22327000	18659000	SNX9	1661	11059000	64695000	28289000	35414000	18831000	22327000	FALSE	FALSE	FALSE	FALSE	FALSE	FALSE	31657600	22327000	1.417906571	51429	SNX9
A0A087WZ13;E9PAU2;Q8IY67-2;Q8IY67	RAVER1	4	7	17.9	16	0	40.412	8807600	8487600	9271100	8758600	9488900	14928000	6933900	RAVER1	2417	8807600	8487600	9271100	8758600	9488900	14928000	FALSE	FALSE	FALSE	FALSE	FALSE	FALSE	8962760	14928000	0.60039925	125950	RAVER1
A0A087WZH7;P29966;Q6NVI1	MARCKS	4	10	53.6	61	0	160.54	79341000	211660000	93090000	72940000	61784000	211480000	155210000	MARCKS	389	79341000	211660000	93090000	72940000	61784000	211480000	FALSE	FALSE	FALSE	FALSE	FALSE	FALSE	103763000	211480000	0.490651598	4082	MARCKS
Q5BKY2;A0A087WZK9;Q6IB98;Q53HG0;B3KS98;O15372;Q53HR0	EIF3H;EIF3S3	14	12	38.1	45	0	72.871	63281000	78810000	59446000	68135000	72328000	51451000	56342000	EIF3H	889	63281000	78810000	59446000	68135000	72328000	51451000	FALSE	FALSE	FALSE	FALSE	FALSE	FALSE	68400000	51451000	1.329420225	8667	EIF3H;EIF3S3
A0A087WZN1;O43837;A0A087X2E5;O43837-2	IDH3B	10	13	37.7	52	0	60.946	39143000	56909000	37330000	25897000	37889000	38450000	44847000	IDH3B	1044	39143000	56909000	37330000	25897000	37889000	38450000	FALSE	FALSE	FALSE	FALSE	FALSE	FALSE	39433600	38450000	1.025581274	3420	IDH3B
X6RJS7;D3DWY6;A0A087WZR3;H9KVA9;A0A0D9SF50;P46736-4;P46736-2;P46736-3;P46736	BRCC3	10	3	17.3	6	0	8.4957	2538600	3197800	3246500	3148600	0	2625700	3786400	BRCC3	2924	2538600	3197800	3246500	3148600	3198951.732	2625700	FALSE	FALSE	FALSE	FALSE	TRUE	FALSE	3066090.346	2625700	1.167723025	79184	BRCC3
A0A0S2Z5I7;A0A087X020;Q9Y3A5	SBDS	5	11	46.8	27	0	27.363	46103000	58558000	17383000	16580000	24488000	41056000	40790000	SBDS	1113	46103000	58558000	17383000	16580000	24488000	41056000	FALSE	FALSE	FALSE	FALSE	FALSE	FALSE	32622400	41056000	0.794583009	51119	SBDS
A0A087X0K9;Q6MZU1;G5E9E7;A9CQZ8;G3V1L9;Q07157-2;Q07157;Q68DX9	TJP1;DKFZp686A1195;DKFZp686M05161	12	10	7	13	0	18.426	10058000	14218000	15843000	11045000	14730000	18009000	2706200	TJP1	3159	10058000	14218000	15843000	11045000	14730000	18009000	FALSE	FALSE	FALSE	FALSE	FALSE	FALSE	13178800	18009000	0.731789661	7082	TJP1
A0A087X0Q1;Q7Z739;Q8NA80;A0A024R7W5;B4DPX9;A0A087WY31;Q658Z6;Q8N3V9;Q96MZ5	YTHDF3;DKFZp451J085;DKFZp451A052	11	4	20.1	10	0	61.275	10270000	6034200	0	0	5307200	9496700	6113100	YTHDF3	2514	10270000	6034200	2599496.197	2445729.498	5307200	9496700	FALSE	FALSE	TRUE	TRUE	FALSE	FALSE	5331325.139	9496700	0.561387128	253943	YTHDF3;DKFZp451A052
A0A087X0Q9;Q9BVL4;Q6ICA4	SELO;dJ402G11.5	3	3	6.1	6	0	10.719	3690900	2142200	2115100	2059000	0	0	955440	SELO	3809	3690900	2142200	2115100	2059000	3856295.782	1404544.811	FALSE	FALSE	FALSE	FALSE	TRUE	TRUE	2772699.156	1404544.811	1.974090919	83642	SELENOO
Q3SYF1;A0A087X0R6;Q9UMY4-2;Q9UMY4;Q9UMY4-3	SNX12	5	7	48.8	24	0	18.774	17579000	25692000	47616000	40150000	49843000	22915000	52871000	SNX12	925	17579000	25692000	47616000	40150000	49843000	22915000	FALSE	FALSE	FALSE	FALSE	FALSE	FALSE	36176000	22915000	1.578703906	29934	SNX12
E9KL42;B4DV16;A1L172;A0A087X0W7;Q86TX2;G3V4F2;B7ZMC1;A0A087WT95;P49753	ACOT1;ACOT2	11	5	16.6	11	0	23.091	8239300	11519000	10870000	0	0	7867700	5368000	ACOT1	2652	8239300	11519000	10870000	2705906.946	2560502.486	7867700	FALSE	FALSE	FALSE	TRUE	TRUE	FALSE	7178941.886	7867700	0.912457502	641371	ACOT1;ACOT2
A0A087X0W9;Q8N6M0-2;Q8N6M0	OTUD6B	3	4	19.5	6	0	7.4817	4896400	4928300	0	0	5759300	6496800	6425700	OTUD6B	2474	4896400	4928300	3041151.971	1841807.824	5759300	6496800	FALSE	FALSE	TRUE	TRUE	FALSE	FALSE	4093391.959	6496800	0.630062794	51633	OTUD6B
A0A087X111;Q9UEU5;Q6NT46;Q13066;Q4V326;A6NDE8;A1L429	GAGE13;GAGE2D;GAGE2A;GAGE2B;GAGE2E;GAGE12H;GAGE12B	7	2	43.6	14	0	32.595	16400000	0	45444000	40979000	43148000	0	103560000	GAGE13	553	16400000	3368238.742	45444000	40979000	43148000	1075932.744	FALSE	TRUE	FALSE	FALSE	FALSE	TRUE	29867847.75	1075932.744	27.75995798	645051	GAGE12B; GAGE12C; GAGE12D; GAGE12E;GAGE12H;GAGE13;GAGE2A;GAGE2B; GAGE2C;GAGE2D; GAGE8;GAGE2E
J3KN36;A0A0G2JN29;A0A087X117;Q5JPE7-2;Q15155;P69849;Q5JPE7;A0A0G2JP90;A0A087WW46;Q5JPE7-3;Q1LZN2	NOMO3;NOMO1;NOMO2	16	18	19.2	48	0	49.176	35704000	38569000	40238000	47435000	59343000	50072000	12462000	NOMO3	1948	35704000	38569000	40238000	47435000	59343000	50072000	FALSE	FALSE	FALSE	FALSE	FALSE	FALSE	44257800	50072000	0.883883208	408050	NOMO3;NOMO1;NOMO2
A0A087X142;B7ZVZ1;A6NMH6;A6NFQ9;F8W8I8;Q92599-2;Q92599-4;Q92599;Q92599-3	8-Sep	11	4	19.5	12	0	24.09	6235700	9252000	7669900	6087300	5496900	13131000	8261700	8-Sep	2271	6235700	9252000	7669900	6087300	5496900	13131000	FALSE	FALSE	FALSE	FALSE	FALSE	FALSE	6948360	13131000	0.529156957	23176	8-Sep
A0A087X176;Q6ZRP7;H0Y430	QSOX2	4	4	8.2	8	0	8.8266	0	5111100	3884000	5285900	6194100	3742800	1856200	QSOX2	3420	1469237.846	5111100	3884000	5285900	6194100	3742800	TRUE	FALSE	FALSE	FALSE	FALSE	FALSE	4388867.569	3742800	1.172616108	169714	QSOX2
B7Z7L9;A0A087X1B2;Q53GS9;B9A018;Q53GS9-2;B3KPG7;B3KMG1;Q53GS9-3	USP39	11	10	28.1	30	0	46.238	17620000	13489000	21879000	27223000	33087000	17265000	12709000	USP39	1931	17620000	13489000	21879000	27223000	33087000	17265000	FALSE	FALSE	FALSE	FALSE	FALSE	FALSE	22659600	17265000	1.312458732	10713	USP39
A0A087X1G7;A0A0B4J1S4;O60613;A0A0J9YX89	15-Sep	9	4	30.5	5	0	14.881	9629200	19056000	0	0	5655100	6011700	16500000	15-Sep	1740	9629200	19056000	2170801.865	2306273.148	5655100	6011700	FALSE	FALSE	TRUE	TRUE	FALSE	FALSE	7763475.003	6011700	1.291394282	9403	SELENOF
A0A087X1K9;E5RGR0;Q6IAQ1;B4DJV9;O75608-2;O75608;E5RJ48;B4DP64	LYPLA1	9	6	57.2	28	0	70.408	32333000	27920000	35278000	32611000	31225000	48546000	55078000	LYPLA1	902	32333000	27920000	35278000	32611000	31225000	48546000	FALSE	FALSE	FALSE	FALSE	FALSE	FALSE	31873400	48546000	0.656560788	10434	LYPLA1
B2R5U7;A0A087X1N2;Q03701	CEBPZ	4	10	11.7	26	0	22.661	15651000	21549000	19237000	20744000	20611000	9533400	6419200	CEBPZ	2475	15651000	21549000	19237000	20744000	20611000	9533400	FALSE	FALSE	FALSE	FALSE	FALSE	FALSE	19558400	9533400	2.051566073	10153	CEBPZ
Q86SZ7;Q2TNB3;A0A087X1Z3;Q9UL46;H0YM70;Q6FHK9	PSME2	7	10	45.6	69	0	114.11	67191000	99680000	51996000	48284000	33532000	113680000	89224000	PSME2	616	67191000	99680000	51996000	48284000	33532000	113680000	FALSE	FALSE	FALSE	FALSE	FALSE	FALSE	60136600	113680000	0.528998944	5721	PSME2
B7ZKT9;A0A087X256;Q2M389;Q2M389-2	KIAA1033	6	7	7.2	14	0	21.677	9765300	7455000	9901700	13450000	8563900	8208700	2391800	KIAA1033	3250	9765300	7455000	9901700	13450000	8563900	8208700	FALSE	FALSE	FALSE	FALSE	FALSE	FALSE	9827180	8208700	1.197166421	23325	WASHC4
A0A0G2JSB3;I3L1D4;B0QYY7;S4R469;Q8TCM0;F8VR27;F8VZY7;Q59HD3;B0QYV1;X5DP44;B7ZLH9;B0QYY4;A0A087X2B1;A0A0G2JRA5;F8WSN4;X5D7T5;J3KNW3;X5DNY3;B7Z1U7;F8VZG9;O43251-9;Q9NWB1-3;O43251-4;O43251-5;O43251-10;O43251-2;O43251;Q9NWB1-4;Q9NWB1-5;Q9NWB1;O43251-7;Q9NWB1-2;O43251-6;O43251-8;B0QYY6;A0A0G2JRD1;S4R3K7;J3QQZ2;J3QRF4;F8VRS4;A6NFN3;A6NFN3-2;O43251-3	RBFOX1;RBFOX2;DKFZp547L059;A2BP1;RBFOX3	43	2	12.9	6	0	4.8059	15235000	18063000	10184000	0	0	20716000	40601000	RBFOX1	1115	15235000	18063000	10184000	3215869.422	2289467.266	20716000	FALSE	FALSE	FALSE	TRUE	TRUE	FALSE	9797467.338	20716000	0.472942042	54715	RBFOX1;RBFOX2;A2BP1;DKFZp547L059;RBFOX3
A0A087X2D5;B4DEF8;Q9BRJ2;A0A0G2JMS5;A0A087WU62	MRPL45	6	6	28.1	10	0	7.9358	6903100	0	11759000	16706000	9584900	9528000	7488700	MRPL45	2351	6903100	2925760.103	11759000	16706000	9584900	9528000	FALSE	TRUE	FALSE	FALSE	FALSE	FALSE	9575752.021	9528000	1.005011757	84311	MRPL45
A0A087X2D8;O60271-4;O60271-2;O60271;O60271-5;O60271-3;O60271-9;B4DS36	SPAG9	15	20	20.7	48	0	69.578	21921000	35853000	21559000	31128000	30791000	25737000	8523900	SPAG9	2246	21921000	35853000	21559000	31128000	30791000	25737000	FALSE	FALSE	FALSE	FALSE	FALSE	FALSE	28250400	25737000	1.09765707	9043	SPAG9
A0A087X2I1;P62333;V9HW24	PSMC6;HEL-S-73	9	17	55.3	81	0	190.86	84987000	91289000	102220000	103810000	98909000	102500000	75121000	PSMC6	724	84987000	91289000	102220000	103810000	98909000	102500000	FALSE	FALSE	FALSE	FALSE	FALSE	FALSE	96243000	102500000	0.938956098	5706	PSMC6;HEL-S-73
A0A090N7T9;Q12765;Q12765-2;A0A024RA21;Q12765-3;B8ZZP4;C9J7U9;B4DE46;B4DH22;B4DIV7;C9K052	SCRN1	11	6	18.6	13	0	21.427	6542300	4068600	13605000	8136500	10013000	0	5012000	SCRN1	2700	6542300	4068600	13605000	8136500	10013000	1956006.432	FALSE	FALSE	FALSE	FALSE	FALSE	TRUE	8473080	1956006.432	4.331826247	9805	SCRN1
A0A0C4DGX4;A0A090N7U0;Q13616;B4DLA3;Q75MQ1;B3KTW0	CUL1	7	15	23.7	37	0	66.294	24862000	25886000	28944000	33715000	23571000	12296000	8382000	CUL1	2260	24862000	25886000	28944000	33715000	23571000	12296000	FALSE	FALSE	FALSE	FALSE	FALSE	FALSE	27395600	12296000	2.228009109	8454	CUL1
A0A090N7V5;O75223;M0QZK8;B3KMN7;O75223-3;B8ZZK2	C7orf24;GGCT	10	6	30.9	13	0	15.418	13241000	30933000	12706000	11531000	12391000	15929000	27887000	C7orf24	1369	13241000	30933000	12706000	11531000	12391000	15929000	FALSE	FALSE	FALSE	FALSE	FALSE	FALSE	16160400	15929000	1.014526963	79017	GGCT
A0A090N7W4;Q00535;Q6IAW3;A0A0S2Z355;Q00535-2	CDK5	5	7	28.1	14	0	12.204	17873000	19689000	10865000	6774400	5910400	11898000	14902000	CDK5	1824	17873000	19689000	10865000	6774400	5910400	11898000	FALSE	FALSE	FALSE	FALSE	FALSE	FALSE	12222360	11898000	1.027261725	1020	CDK5
A0A090N7X1;A0A090N7Y2;Q9UG63;Q9UG63-2;C9JHK9;C9JZV3	ABCF2	6	17	28.7	48	0	52.186	56041000	56080000	23123000	27829000	41817000	24933000	24895000	ABCF2	1450	56041000	56080000	23123000	27829000	41817000	24933000	FALSE	FALSE	FALSE	FALSE	FALSE	FALSE	40978000	24933000	1.643524646	10061	ABCF2
A0A090N8G0;P41250	GARS	4	31	53.3	166	0	305.97	217570000	204810000	187680000	190270000	261200000	470070000	144400000	GARS	415	217570000	204810000	187680000	190270000	261200000	470070000	FALSE	FALSE	FALSE	FALSE	FALSE	FALSE	212306000	470070000	0.451647627	2617	GARS
B3KQQ0;A0A090N8P3;O95302;O95302-3;B7Z1U8;B7Z230	FKBP9	14	7	13	11	0	11.698	74280000	282330000	137650000	116040000	1.26E+08	158070000	87569000	FKBP9	627	74280000	282330000	137650000	116040000	1.26E+08	158070000	FALSE	FALSE	FALSE	FALSE	FALSE	FALSE	147260000	158070000	0.931612577	11328	FKBP9
A0A090N8Y2;P13667	ERP70;PDIA4	3	38	58.8	261	0	276.9	473360000	745810000	986300000	624800000	649570000	343720000	250480000	ERP70	252	473360000	745810000	986300000	624800000	649570000	343720000	FALSE	FALSE	FALSE	FALSE	FALSE	FALSE	695968000	343720000	2.024810893	9601	ERP70;PDIA4
Q6NZ61;A8K005;A0A090N900;Q15382;C9J931	RHEB	7	6	32.1	32	0	25.464	43237000	44380000	14367000	20150000	21507000	23902000	60061000	RHEB	849	43237000	44380000	14367000	20150000	21507000	23902000	FALSE	FALSE	FALSE	FALSE	FALSE	FALSE	28728200	23902000	1.201916158	6009	RHEB
B2RUU3;A0A096LNH6;Q14185	DOCK1	3	2	1	3	0.0010246	3.4215	708260	1579400	0	890150	860110	1034200	143160	DOCK1	4233	708260	1579400	905430.1529	890150	860110	1034200	FALSE	FALSE	TRUE	FALSE	FALSE	FALSE	988670.0306	1034200	0.955975663	1793	DOCK1
F8W7U3;J3KP36;B7ZME8;A8K5W5;A0A0A0MR88;A0A096LPC5;Q9Y4E1-3;Q9Y4E1-2;Q9Y4E1;Q9Y4E1-4;Q641Q2-2;Q641Q2;B4DPK9;Q9NVB8;B4DF48;A0A087WYF6;E7ESD2;Q9Y4E1-5;Q9Y4E1-6;B1AP61	FAM21A;FAM21C	26	8	8.6	15	0	17.463	11464000	6654000	7918400	4482800	7925000	5131000	2163200	FAM21A	3306	11464000	6654000	7918400	4482800	7925000	5131000	FALSE	FALSE	FALSE	FALSE	FALSE	FALSE	7688840	5131000	1.498507114	253725	WASHC2A;WASHC2C;FAM21A
A0A096LPI6;A0A140VKB0;A0A0B4J2D5;P30042;A0A096LNH5;A0A0B4J2H4;H7C1F6;P30042-2;A0A096LP73;H7C2G3;F2Z2Q0;A0A096LP12	C21orf33	13	5	37.6	23	0	39.132	17651000	28951000	37606000	24059000	22029000	30708000	28027000	C21orf33	1366	17651000	28951000	37606000	24059000	22029000	30708000	FALSE	FALSE	FALSE	FALSE	FALSE	FALSE	26059200	30708000	0.848612739	8209	LOC102724023;C21orf33
A8K2B4;A0A097PID1;A0A097PIC4;A0A0U1RRM6;Q8N8S7-3;Q8N8S7-2;Q8N8S7;A0A075B6E5	ENAH	13	15	25.1	40	0	64.103	77587000	17511000	31239000	34013000	52931000	52272000	37902000	ENAH	1156	77587000	17511000	31239000	34013000	52931000	52272000	FALSE	FALSE	FALSE	FALSE	FALSE	FALSE	42656200	52272000	0.816043006	55740	ENAH
B2RB99;B4DXL5;A0A0A0MQR2;Q9BY42;A2A2L5;A2A2L6	RTFDC1	7	6	23.2	13	0	15.646	10085000	11142000	7769400	6191100	10375000	6442800	10553000	RTFDC1	2072	10085000	11142000	7769400	6191100	10375000	6442800	FALSE	FALSE	FALSE	FALSE	FALSE	FALSE	9112500	6442800	1.414369529	51507	RTFDC1
U3KQC1;A0A0A0MQU0;Q9BV38;K7EIR0	WDR18	7	9	25.6	23	0	29.664	21174000	16468000	26820000	25718000	26370000	19141000	15667000	WDR18	1784	21174000	16468000	26820000	25718000	26370000	19141000	FALSE	FALSE	FALSE	FALSE	FALSE	FALSE	23310000	19141000	1.217804712	57418	WDR18
A0A0A0MQV2;O75582;O75582-3	RPS6KA5	5	4	7.4	5	0	10.032	2629400	8559100	4837300	4833300	4369900	4336100	1611100	RPS6KA5	3522	2629400	8559100	4837300	4833300	4369900	4336100	FALSE	FALSE	FALSE	FALSE	FALSE	FALSE	5045800	4336100	1.163672425	9252	RPS6KA5
Q5T092;A0A0A0MR06;Q5T091;Q5T094;Q9P0H9;O15258;Q5T093;Q6IBJ7	RER1	8	4	35.4	10	0	13.851	11319000	11807000	7414600	8442700	8084000	10127000	19797000	RER1	1609	11319000	11807000	7414600	8442700	8084000	10127000	FALSE	FALSE	FALSE	FALSE	FALSE	FALSE	9413460	10127000	0.929540831	11079	RER1
A0A0S2Z4X1;A0A0S2Z4W4;Q7Z3D7;A0A0A0MR66;P98175-4;P98175-3;P98175-2;P98175	DKFZp686E2459;RBM10	9	5	7.5	9	0	10.468	4273400	5348400	6148900	4326500	0	3520400	2073700	DKFZp686E2459	3345	4273400	5348400	6148900	4326500	1629868.497	3520400	FALSE	FALSE	FALSE	FALSE	TRUE	FALSE	4345413.699	3520400	1.234352261	8241	RBM10
G3V5X4;A0A0A0MRE3;D4YW74;Q8WXH0;Q8WXH0-2	SYNE2;TROPH	7	3	0.5	3	0.00052219	3.6887	1228300	1986600	0	0	0	1325000	56799	SYNE2	4271	1228300	1986600	1363447.651	3870976.635	1301704.91	1325000	FALSE	FALSE	TRUE	TRUE	TRUE	FALSE	1950205.839	1325000	1.471853463	23224	SYNE2
H0YBF7;A0A0A0MRE5;Q9ULH1;Q9ULH1-2;H0YBM4	ASAP1	8	4	5.4	3	0	7.2612	3135200	3661600	0	3049800	0	8254300	1377800	ASAP1	3622	3135200	3661600	2722655.282	3049800	1712045.775	8254300	FALSE	FALSE	TRUE	FALSE	TRUE	FALSE	2856260.211	8254300	0.346033002	50807	ASAP1
A8K885;A0A0A0MRI2;Q9UNH7;Q9UNH7-2;B4DJS7;Q5QTQ6;G3V5X9	SNX6	14	12	32.3	33	0	28.691	22803000	28478000	21882000	18120000	9789400	27088000	17872000	SNX6	1680	22803000	28478000	21882000	18120000	9789400	27088000	FALSE	FALSE	FALSE	FALSE	FALSE	FALSE	20214480	27088000	0.746252215	58533	SNX6
A0A0A0MRJ6;H7BY58;P22061;P22061-2;B7Z972;F6S8N6	PCMT1	11	12	51.2	65	0	208.3	77435000	119470000	138060000	117050000	109630000	92092000	133700000	PCMT1	449	77435000	119470000	138060000	117050000	109630000	92092000	FALSE	FALSE	FALSE	FALSE	FALSE	FALSE	112329000	92092000	1.219747644	5110	PCMT1
A0A0A0MRK6;Q13505-3;Q13505;A0A0C4DFQ1;Q13505-2	MTX1	5	7	22.1	16	0	17.895	16170000	10589000	11940000	11671000	12917000	11327000	9227600	MTX1	2183	16170000	10589000	11940000	11671000	12917000	11327000	FALSE	FALSE	FALSE	FALSE	FALSE	FALSE	12657400	11327000	1.117453871	4580	MTX1
B2RAU8;A0A0A0MRM9;Q14978;Q14978-3;Q14978-2;Q96J17	NOLC1	10	13	18.6	47	0	32.171	161420000	81630000	75227000	86219000	60608000	36016000	34024000	NOLC1	1231	161420000	81630000	75227000	86219000	60608000	36016000	FALSE	FALSE	FALSE	FALSE	FALSE	FALSE	93020800	36016000	2.582763216	9221	NOLC1
A0A0A0MRN0;Q5VTL8	PRPF38B	3	4	9.4	6	0	6.7639	2121500	0	3610600	3116800	0	3667400	6066500	PRPF38B	2522	2121500	1847368.398	3610600	3116800	4117357.432	3667400	FALSE	TRUE	FALSE	FALSE	TRUE	FALSE	2962725.166	3667400	0.807854383	55119	PRPF38B
Q5TAL4;Q53G33;A0A0A0MRR7;P09234	SNRPC	5	3	24.5	21	0	31.167	20188000	31343000	28458000	33204000	33883000	36432000	144150000	SNRPC	416	20188000	31343000	28458000	33204000	33883000	36432000	FALSE	FALSE	FALSE	FALSE	FALSE	FALSE	29415200	36432000	0.807400088	6631	SNRPC
B6VEX5;B6VEX4;B6VEX3;A0A0A0MRT6;Q59G41;Q8IZP0-10;Q8IZP0-8;Q8IZP0-7;Q8IZP0-2;Q8IZP0-4;Q8IZP0-3;Q8IZP0-5;Q8IZP0-6;Q8IZP0-9;Q8IZP0-12;Q8IZP0;B4DKX2;E9PEZ7;E7EW77;E7EP65;A0A0C4DG21;F8WAL6;Q8IZP0-11;Q9NYB9-2;Q9NYB9-4;Q9NYB9	ABI1;ABI2	40	4	13.4	9	0	12.523	15093000	14709000	0	0	0	12339000	11424000	ABI1	2010	15093000	14709000	2325595.078	2578569.874	3350233.262	12339000	FALSE	FALSE	TRUE	TRUE	TRUE	FALSE	7611279.643	12339000	0.616847365	10006	ABI2;ABI1
X6RA56;X6RCK5;A0A0A0MRV8;Q8NB28;X6RLR1;O75935-3;O75935-2;O75935	DCTN3	8	3	20.4	7	0	5.9333	8364200	7211900	14087000	12947000	11408000	9219900	20801000	DCTN3	1566	8364200	7211900	14087000	12947000	11408000	9219900	FALSE	FALSE	FALSE	FALSE	FALSE	FALSE	10803620	9219900	1.171771928	11258	DCTN3
A0A0A0MS41;B4DRS6;Q9BWM7;S4R3N9	SFXN3	4	10	47.7	40	0	64.78	52808000	43049000	51371000	43430000	36863000	52965000	50320000	SFXN3	956	52808000	43049000	51371000	43430000	36863000	52965000	FALSE	FALSE	FALSE	FALSE	FALSE	FALSE	45504200	52965000	0.859137166	81855	SFXN3
B3KSS4;A0A0A0MSA9;A8K4I1;A0A0C4DG49;P15151-3;P15151-2;P15151-4;P15151	PVR	8	7	22.9	14	0	15.365	0	4767400	0	4848100	0	102680000	29572000	PVR	1314	2020522.025	4767400	1564699.582	4848100	2191933.053	102680000	TRUE	FALSE	TRUE	FALSE	TRUE	FALSE	3078530.932	102680000	0.029981797	5817	PVR
B2RB06;A0A140VK76;E9PF18;B3KTT6;A0A0A0MSE2;Q16836;Q16836-3;Q16836-2	HADH	8	7	27.1	23	0	18.66	16839000	12692000	40092000	28998000	24139000	29951000	37804000	HADH	1158	16839000	12692000	40092000	28998000	24139000	29951000	FALSE	FALSE	FALSE	FALSE	FALSE	FALSE	24552000	29951000	0.819738907	3033	HADH
Q6I9R8;Q2XQU9;J3KNW4;A0A0A0MSG2;Q14192;I0CE67;Q2TSB7;Q53T40	FHL2;AAG11	13	17	74.2	71	0	98.044	63058000	78908000	37524000	36264000	66719000	289450000	101960000	FHL2	559	63058000	78908000	37524000	36264000	66719000	289450000	FALSE	FALSE	FALSE	FALSE	FALSE	FALSE	56494600	289450000	0.195179133	2274	FHL2;AAG11
F8W9B8;B4E0U7;B4DHG4;Q8IW24;A0A0A0MSI8;O00471	EXOC5	6	3	4.8	7	0	6.9321	1930700	2330400	2796100	2624900	0	3278300	1050400	EXOC5	3752	1930700	2330400	2796100	2624900	2007631.524	3278300	FALSE	FALSE	FALSE	FALSE	TRUE	FALSE	2337946.305	3278300	0.713158132	10640	EXOC5
A0A0A0MSJ0;Q86XP3-2;Q86XP3;B3KX23;T2DQ69;B3KTL4;B3KMI4;B3KV84	DDX42	8	12	21.6	30	0	24.896	22257000	21352000	19082000	22401000	27289000	18708000	11149000	DDX42	2025	22257000	21352000	19082000	22401000	27289000	18708000	FALSE	FALSE	FALSE	FALSE	FALSE	FALSE	22476200	18708000	1.201421852	11325	DDX42
B4DE67;A0A0A0MT32;B3KU19;B3KRG8;A8K2H6;Q6ZUY8;P38571-2;P38571;Q5T073	LIPA	9	2	13.2	2	0	9.3491	0	6827600	0	0	3753800	3598800	6041900	LIPA	2525	2303896.867	6827600	2224004.059	2307658.829	3753800	3598800	TRUE	FALSE	TRUE	TRUE	FALSE	FALSE	3483391.951	3598800	0.967931519	3988	LIPA
A7E2E1;Q9HBD4;B9EGQ8;A0A0A0MT49;P51532-5;P51532-2;P51532-3;P51532-4;P51532;Q59FZ6;B4E0F1;B4DSI8	SMARCA4	42	18	13	29	0	45.335	62738000	49780000	60735000	83055000	65498000	40754000	11140000	SMARCA4	2027	62738000	49780000	60735000	83055000	65498000	40754000	FALSE	FALSE	FALSE	FALSE	FALSE	FALSE	64361200	40754000	1.579260931	6597	SMARCA4
B4DZS8;A0A0A0MT60;Q5T1M5;Q5T1M5-2;B4DVS2	FKBP15	7	6	9.4	16	0	23.943	9225100	6447100	4911300	6028300	0	9152600	3308100	FKBP15	3018	9225100	6447100	4911300	6028300	2012645.291	9152600	FALSE	FALSE	FALSE	FALSE	TRUE	FALSE	5724889.058	9152600	0.6254932	23307	FKBP15
A0A0S2Z422;A0A0A0MT83;P26440;H0YLC3;A0A0S2Z4K7;P26440-2	IVD	11	6	13.9	13	0	11.986	5776100	8927900	14906000	0	0	13274000	9457000	IVD	2165	5776100	8927900	14906000	1647230.565	3688507.527	13274000	FALSE	FALSE	FALSE	TRUE	TRUE	FALSE	6989147.618	13274000	0.526529126	3712	IVD
A0A0A0MTB8;Q8NI36	WDR36	2	14	17.9	33	0	42.553	17333000	16789000	25704000	25905000	25478000	13973000	8405100	WDR36	2256	17333000	16789000	25704000	25905000	25478000	13973000	FALSE	FALSE	FALSE	FALSE	FALSE	FALSE	22241800	13973000	1.591769842	134430	WDR36
A0A0A0MTR7;A0A0A0MTC1;Q63HN8;Q63HN8-4	RNF213	8	11	2.4	9	0	14.266	0	3959500	14894000	9408300	0	7771100	345440	RNF213	4130	2699298.746	3959500	14894000	9408300	2139803.332	7771100	TRUE	FALSE	FALSE	FALSE	TRUE	FALSE	6620180.416	7771100	0.851897468	57674	RNF213
V9HWF0;A0A0A0MTH3;Q13418;Q13418-2;Q13418-3	HEL-S-28;ILK	8	12	28.1	37	0	31.157	12585000	20743000	18179000	20153000	30224000	46252000	18165000	HEL-S-28	1674	12585000	20743000	18179000	20153000	30224000	46252000	FALSE	FALSE	FALSE	FALSE	FALSE	FALSE	20376800	46252000	0.440560408	3611	ILK
A0A140VKB1;A0A0A0MTN0;Q13617;Q13617-2;Q5T2B5;B7Z1Y1	CUL2	6	9	11.5	18	0	21.84	20638000	14448000	15601000	0	14811000	27752000	7775300	CUL2	2318	20638000	14448000	15601000	1317907.439	14811000	27752000	FALSE	FALSE	FALSE	TRUE	FALSE	FALSE	13363181.49	27752000	0.481521385	8453	CUL2
A0A0A6YYA0;Q86XR7-2;Q9Y3B3-2;Q9Y3B3;Q3B7W7;B4E2C1	TMED7-TICAM2;TMED7	7	4	28.7	24	0	47.555	26119000	38091000	22468000	25013000	32254000	30437000	44905000	TMED7-TICAM2	1043	26119000	38091000	22468000	25013000	32254000	30437000	FALSE	FALSE	FALSE	FALSE	FALSE	FALSE	28789000	30437000	0.945855373	100302736	TMED7;TMED7-TICAM2
A0A0A6YYL4;P57737-3;B3KUH7;B3KSY4;B4DKU9;P57737-2;P57737-4;P57737	CORO7-PAM16;CORO7;hCG_1787779	12	5	7.3	8	0	55.431	8180100	8055800	0	6924100	6672500	5647500	3566600	CORO7-PAM16	2962	8180100	8055800	1650817.052	6924100	6672500	5647500	FALSE	FALSE	TRUE	FALSE	FALSE	FALSE	6296663.41	5647500	1.11494704	100529144	CORO7;CORO7-PAM16
A0A0A7E7X3;Q9NZ08;Q9NZ08-2;A8K6H1;A0A0A7E6I2;A0A0A7E6D8;A0A024RAR8;A0A0A7E7W9;A0A0A7E7W5;A0A0A7E7T3;A0A0A7E7S5;A0A0A7E6P9;A0A0A7E6P4;A0A0A7E6P0;A0A0A7E6K0;A0A0A7E6D4;A0A075BSP6;A0A0A7E6J5;A0A075BTL2;A0A075BV59;A0A075BW43	ERAP1;ARTS-1	24	9	11.5	18	0	26.707	7571400	22409000	6410000	6666200	4612200	25095000	4798100	ERAP1	2730	7571400	22409000	6410000	6666200	4612200	25095000	FALSE	FALSE	FALSE	FALSE	FALSE	FALSE	9533760	25095000	0.379906754	51752	ERAP1;ARTS-1
A0A0A8JCD0;Q59GR1;O15118;A0A0S2A5C8;B4DIP7;K7EQ23;O15118-2	NPC1	7	9	9.6	26	0	34.054	7084900	16592000	10293000	11549000	12081000	35545000	7778000	NPC1	2317	7084900	16592000	10293000	11549000	12081000	35545000	FALSE	FALSE	FALSE	FALSE	FALSE	FALSE	11519980	35545000	0.324095653	4864	NPC1
A0A0B4J1Z1;B4DEK2;C9JAB2;Q16629-3;Q16629-2;Q16629-4;Q16629;Q8NB80	SRSF7	9	8	56.2	41	0	34.401	79193000	105200000	129810000	130080000	96286000	99997000	199310000	SRSF7	305	79193000	105200000	129810000	130080000	96286000	99997000	FALSE	FALSE	FALSE	FALSE	FALSE	FALSE	108113800	99997000	1.081170435	6432	SRSF7
B3KP31;A0A0B4J2A0;Q9UHJ6	TRPV1;SHPK	4	8	23.2	13	0	22.646	4228700	0	24269000	7399100	13624000	5247400	4452300	TRPV1	2792	4228700	2288592.844	24269000	7399100	13624000	5247400	FALSE	TRUE	FALSE	FALSE	FALSE	FALSE	10361878.57	5247400	1.974669087	23729	SHPK
K7EM56;A0A0B4J2B4;S4R417;K7ELC2;P62841;S4R456;K7EJ78;K7EQJ5	RPS15	8	5	58.9	38	0	19.249	41956000	41238000	69612000	77460000	76579000	48005000	200250000	RPS15	304	41956000	41238000	69612000	77460000	76579000	48005000	FALSE	FALSE	FALSE	FALSE	FALSE	FALSE	61369000	48005000	1.278387668	6209	RPS15
A0A0P1J1R0;Q5W0H4;A0A0B4J2C3;P13693;J3KPG2;A0A024RDY2;P13693-2;B4DKJ4;E9PJF7	TPT1	14	4	44.2	55	0	152.51	78875000	2.17E+08	119910000	132100000	154880000	110950000	316840000	TPT1	201	78875000	2.17E+08	119910000	132100000	154880000	110950000	FALSE	FALSE	FALSE	FALSE	FALSE	FALSE	140553000	110950000	1.26681388	7178	TPT1;seTCTP
A0A0B4J2E5;Q15269	PWP2	3	5	9	17	0	18.078	6087300	6352000	8597100	11286000	10336000	5177500	3207200	PWP2	3046	6087300	6352000	8597100	11286000	10336000	5177500	FALSE	FALSE	FALSE	FALSE	FALSE	FALSE	8531680	5177500	1.64783776	102724159	LOC102724159;PWP2
A0A0B6XK00	LGALS1	1	1	67.7	5	0.0063981	2.5718	0	5395000	4608800	3866000	4379600	7049600	26721000	A0A0B6XK00	1400	1920702.773	5395000	4608800	3866000	4379600	7049600	TRUE	FALSE	FALSE	FALSE	FALSE	FALSE	4034020.555	7049600	0.572233964	NA
A0A0C4DFL7;Q16850;B3KRC6;Q16850-2	CYP51A1	6	11	23	24	0	30.428	14799000	18881000	22935000	25392000	8910000	5280500	10249000	CYP51A1	2096.5	14799000	18881000	22935000	25392000	8910000	5280500	FALSE	FALSE	FALSE	FALSE	FALSE	FALSE	18183400	5280500	3.443499669	1595	CYP51A1
E7EQD7;A0A0C4DFT3;Q12959-5;Q12959-3;Q12959-6;Q12959-4;Q12959;Q12959-7;Q12959-2;Q6PJH1;B4E2H8;Q59FC4;Q12959-8;Q12959-9	DLG1	23	3	6.1	10	0	10.705	2427300	4168200	0	0	0	10811000	2749600	DLG1	3142	2427300	4168200	2590781.064	1729611.687	4120768.536	10811000	FALSE	FALSE	TRUE	TRUE	TRUE	FALSE	3007332.257	10811000	0.278173366	1739	DLG1
Q7Z7M4;A0A0C4DFU2;P04179-4;P04179;A0A0C4DFU1;Q7Z7M6;Q4ZJI1;Q7Z7M7;P04179-2;F5H3C5;A0A0C4DG56;F5H4R2;F5GYZ5;Q7Z7M5;P04179-3;G8JLJ2	SOD2	21	6	31.5	22	0	91.242	22063000	18556000	29408000	22235000	15054000	29002000	34777000	SOD2	1221	22063000	18556000	29408000	22235000	15054000	29002000	FALSE	FALSE	FALSE	FALSE	FALSE	FALSE	21463200	29002000	0.740059306	6648	SOD2
E7ENN3;Q7RTM4;A0A0C4DG40;Q8NF91-4;Q8NF91;Q8NF91-7;Q8NF91-10	SYNE1	17	4	0.6	8	0	6.998	44622000	38219000	0	45406000	35469000	64595000	1320900	SYNE1	3646	44622000	38219000	1272746.643	45406000	35469000	64595000	FALSE	FALSE	TRUE	FALSE	FALSE	FALSE	32997749.33	64595000	0.510840612	23345	SYNE1
A0A0C4DG85;P40394;P40394-2;C9JP14;E9PFG0	ADH7	5	2	5.6	6	0.0057252	2.6512	0	0	55485000	56018000	0	93169000	26976000	ADH7	1389	794573.6407	1731400.396	55485000	56018000	3175143.923	93169000	TRUE	TRUE	FALSE	FALSE	TRUE	FALSE	23440823.59	93169000	0.251594668	131	ADH7
A8K6X3;A0A0C4DG89;Q7L014;D3DQA6	DDX46	6	23	22.8	70	0	93.098	60860000	46747000	47243000	49705000	54065000	49711000	17070000	DDX46	1719	60860000	46747000	47243000	49705000	54065000	49711000	FALSE	FALSE	FALSE	FALSE	FALSE	FALSE	51724000	49711000	1.040494056	9879	DDX46
A0A0C4DGB0;Q9UIL1-3;Q9UIL1-2;Q9UIL1	SCOC	4	1	22	7	0	33.6	0	5806500	0	0	9237400	4535800	29389000	SCOC	1321	1201115.061	5806500	2731038.996	4130896.174	9237400	4535800	TRUE	FALSE	TRUE	TRUE	FALSE	FALSE	4621390.046	4535800	1.01886989	60592	SCOC
A0A0C4DGE4;Q7Z338;F8W9Y0;A0A0J9YW33;Q53YE2;Q13277-2;Q13277-3;Q13277;B4DE70	STX3;DKFZp686L1857;STX3A	9	6	30.4	15	0	28.115	11076000	16826000	6780800	11053000	10770000	3154700	19578000	STX3	1617	11076000	16826000	6780800	11053000	10770000	3154700	FALSE	FALSE	FALSE	FALSE	FALSE	FALSE	11301160	3154700	3.582324785	6809	STX3;STX3A
A0A0C4DGG1;B4DUI2;D3DQR0;Q9UKS6;E9PIY1	PACSIN3	9	6	19.3	17	0	25.206	0	7001800	16531000	24604000	14862000	11897000	6893900	PACSIN3	2423	2414098.585	7001800	16531000	24604000	14862000	11897000	TRUE	FALSE	FALSE	FALSE	FALSE	FALSE	13082579.72	11897000	1.09965367	29763	PACSIN3
B3KY63;F5GWX5;A0A0C4DGG9;Q14839;Q14839-2	CHD4	33	26	22.2	69	0	122.09	49833000	61803000	59317000	66297000	73733000	42721000	9793200	CHD4	2140	49833000	61803000	59317000	66297000	73733000	42721000	FALSE	FALSE	FALSE	FALSE	FALSE	FALSE	62196600	42721000	1.455878842	1108	CHD4
A0A0C4DGH2;P62070;P62070-4;E9PK85;P62070-3;P62070-2	RRAS2	8	3	29.6	9	0	16.649	0	1600300	4905400	2342400	2444100	19123000	6806700	RRAS2	2437	2058991.518	1600300	4905400	2342400	2444100	19123000	TRUE	FALSE	FALSE	FALSE	FALSE	FALSE	2670238.304	19123000	0.139634906	22800	RRAS2
A0A0C4DGN6;Q59FC3;Q9Y2X7;Q9Y2X7-3;J3QRU8;B4DMF7;B4DS81	GIT1	32	6	8.2	5	0	8.3634	5837000	8632300	0	0	0	5040000	2586900	GIT1	3191	5837000	8632300	2597581.285	3366723.115	4197802.982	5040000	FALSE	FALSE	TRUE	TRUE	TRUE	FALSE	4926281.476	5040000	0.977436801	28964	GIT1
A0A0C4DGQ5;P04632;K7ELJ7;K7EIV0;A0A075B7C0;K7EKD8;U3KQE2;K7EM73;U3KPR7	CAPNS1	12	8	32.3	49	0	91.243	55889000	44572000	89491000	60630000	77888000	112980000	123790000	CAPNS1	474	55889000	44572000	89491000	60630000	77888000	112980000	FALSE	FALSE	FALSE	FALSE	FALSE	FALSE	65694000	112980000	0.581465746	826	CAPNS1
A0A0C4DGQ7;C9JRL6;B7Z872;K7EIK7;B7Z2F5;O95834;O95834-2;O95834-3;B7Z918	EML2	17	4	12.2	8	0	10.603	5100800	6844300	5847000	6113700	0	5623800	4416000	EML2	2800	5100800	6844300	5847000	6113700	1657153.274	5623800	FALSE	FALSE	FALSE	FALSE	TRUE	FALSE	5112590.655	5623800	0.909098946	24139	EML2
A0A0C4DGS0;P56556;R4GN43	NDUFA6	3	3	27.3	7	0	5.7668	9153400	12235000	7031800	9134500	0	7694500	21582000	NDUFA6	1540	9153400	12235000	7031800	9134500	2416395.92	7694500	FALSE	FALSE	FALSE	FALSE	TRUE	FALSE	7994219.184	7694500	1.038952392	4700	NDUFA6
A0A0C4DGS5;Q08379;Q08379-2	GOLGA2	8	5	7.3	8	0	19.973	0	5530500	4129000	5004600	0	4903400	1666800	GOLGA2	3496	1380186.391	5530500	4129000	5004600	1651767.173	4903400	TRUE	FALSE	FALSE	FALSE	TRUE	FALSE	3539210.713	4903400	0.721787069	2801	GOLGA2
A0A0C4DGV5;O95218-2;O95218	ZRANB2	3	7	21.7	28	0	28.577	30848000	15459000	19163000	25299000	19929000	24936000	20737000	ZRANB2	1571	30848000	15459000	19163000	25299000	19929000	24936000	FALSE	FALSE	FALSE	FALSE	FALSE	FALSE	22139600	24936000	0.887856914	9406	ZRANB2
A0A0C4DGZ0;P24928;A0A087WWE2;P24928-2	POLR2A	5	4	3.6	9	0	7.8972	3562300	2991600	6089700	7631900	4681700	4022600	852550	POLR2A	3853	3562300	2991600	6089700	7631900	4681700	4022600	FALSE	FALSE	FALSE	FALSE	FALSE	FALSE	4991440	4022600	1.240849202	5430	POLR2A
B4DSE2;B4E0C7;A0A0C4DGZ9;Q53HP2;D3DQU2;O14773-2;O14773;B4DE89;B2R608;B4DIV8	TPP1	10	4	15.6	54	0	27.497	43439000	29244000	103910000	54770000	39518000	48987000	58708000	TPP1	863	43439000	29244000	103910000	54770000	39518000	48987000	FALSE	FALSE	FALSE	FALSE	FALSE	FALSE	54176200	48987000	1.105930145	1200	TPP1
Q96CA8;Q6P5Y5;Q4VBY6;A4VCI5;Q5QPR4;J3QR29;B4E3D9;A0A0D9SEI3;Q5QPR3;B7ZVY7;A0A0D9SER5;A0A0D9SEN2;J3QR44;Q9UQ88-5;Q9UQ88-10;P21127-12;P21127-4;P21127-5;P21127-10;P21127-6;P21127-9;Q9UQ88-4;P21127-8;Q9UQ88-3;Q9UQ88-2;P21127-3;P21127-2;Q9UQ88;P21127;Q9UQ88-9	CDC2L2;CDC2L1;CDK11A;CDK11B	33	5	10.8	16	0	12.695	9518400	7124300	11678000	9227500	15881000	8419000	5528400	CDC2L2	2620	9518400	7124300	11678000	9227500	15881000	8419000	FALSE	FALSE	FALSE	FALSE	FALSE	FALSE	10685840	8419000	1.26925288	984	CDK11B;CDC2L2;CDK11A;CDC2L1
E7ENQ1;G3XAA2;H7C360;V9HWH3;G5E948;B7Z3V5;Q53TX8;E7EN19;E7ESS2;B7Z388;A0A0D9SEY1;O95819-4;O95819-2;O95819;O95819-5;O95819-3;C9J840;E7EX83;A0A0D9SG62;Q5MD60;Q9UKE5-8;Q8N4C8-5;Q9UKE5-5;Q8N4C8-2;Q9UKE5-7;Q8N4C8-3;Q9UKE5-3;Q8N4C8-4;Q9UKE5-6;Q9UKE5-2;Q8N4C8;Q9UKE5-4;Q9UKE5	MAP4K4;HEL-S-31;TNIK;MINK1	41	7	6.5	13	0	8.6683	4678600	5922300	9222900	9305400	8377200	8817400	2320200	MAP4K4	3272	4678600	5922300	9222900	9305400	8377200	8817400	FALSE	FALSE	FALSE	FALSE	FALSE	FALSE	7501280	8817400	0.850736045	9448	MAP4K4;MINK1;TNIK
A0A0D9SFB3;A0A0D9SG12;B5BTY4;Q59GX6;A0A0D9SF53;O00571-2;O00571;A0A024R9A4;O15523-2;O15523;B4DLU5;Q5S4N1	DDX3X;DDX3Y	29	31	54.7	172	0	194.19	213190000	228270000	256940000	272760000	320210000	214110000	106170000	DDX3X	543	213190000	228270000	256940000	272760000	320210000	214110000	FALSE	FALSE	FALSE	FALSE	FALSE	FALSE	258274000	214110000	1.206267806	1654	DDX3X;DDX3Y
A0A0D9SG71;B4DWT6;A0A0R4J2E5;Q53G67;P49459;A0A0D9SEZ6;Q53G86;P49459-3;P49459-2	UBE2A	9	2	22.7	10	0	4.4281	6370500	4601300	5846700	5666800	6608400	7738100	25896000	UBE2A	1425	6370500	4601300	5846700	5666800	6608400	7738100	FALSE	FALSE	FALSE	FALSE	FALSE	FALSE	5818740	7738100	0.751959783	7319	UBE2A
Q5JRC6;A0A0D9SGE8;Q8IWS0-5;Q8IWS0-3;Q8IWS0;B4E138;Q8IWS0-4;Q8IWS0-2	PHF6	8	2	8.3	4	0	5.5963	0	3969700	0	3830000	3571500	2121900	3057400	PHF6	3078	1968222.3	3969700	2402515.566	3830000	3571500	2121900	TRUE	FALSE	TRUE	FALSE	FALSE	FALSE	3148387.573	2121900	1.483758694	84295	PHF6
A0A0F7L0Q8;A0A0F7KYT8;B4DXZ6;A0A0F7L1S3;P51114-2;P51114;E9PFF5;B4DM21;E7EU85;B4DGH9;B4DM78;P51114-3	FXR1	19	18	43.7	82	0	96.273	72038000	48670000	61774000	66092000	82777000	82291000	38957000	FXR1	1138	72038000	48670000	61774000	66092000	82777000	82291000	FALSE	FALSE	FALSE	FALSE	FALSE	FALSE	66270200	82291000	0.805315284	8087	FXR1
A0A0F7NGI8;Q32MZ4-3;Q32MZ4-2;Q32MZ4;Q05D04	LRRFIP1	8	15	35.1	32	0	111.64	38357000	15141000	24408000	31926000	45615000	25088000	16635000	A0A0F7NGI8	1733	38357000	15141000	24408000	31926000	45615000	25088000	FALSE	FALSE	FALSE	FALSE	FALSE	FALSE	31089400	25088000	1.239213967	9208	LRRFIP1
Q6URC4;A0A0G2JH68;O60610;A0A140T8Z0;O60610-2;O60610-3;H9KV28;A0RZB8	DIAPH1	13	21	20.4	56	0	124.43	37316000	49560000	51140000	46801000	54771000	65026000	14911000	DIAPH1	1823	37316000	49560000	51140000	46801000	54771000	65026000	FALSE	FALSE	FALSE	FALSE	FALSE	FALSE	47917600	65026000	0.736899087	1729	DIAPH1
A8K5I0;A0A0G2JIW1;P0DMV9;P0DMV8;Q59EJ3;B4DNT8;B4DWK5;P0DMV8-2;B4DFN9;B4DI39;B4E1S9;B4E388;B4DVU9;V9GZ37;B3KTT5;B4DNX1;B4E1T6	HEL-S-103;HSPA1B;HSPA1A	19	15	63.2	159	0	323.31	487190000	207980000	377730000	307340000	388720000	296180000	179250000	HEL-S-103	337	487190000	207980000	377730000	307340000	388720000	296180000	FALSE	FALSE	FALSE	FALSE	FALSE	FALSE	353792000	296180000	1.194516848	3303	HSPA1B;HSPA1A
A0A0G2JNZ2;A0A0G2JPP5;Q14160;Q14160-3;A0A0G2JMS7;Q14160-2	SCRIB	8	9	8.5	13	0	48.071	10265000	8442900	0	0	0	15897000	2492600	SCRIB	3217	10265000	8442900	2355730.223	2210108.818	3107394.225	15897000	FALSE	FALSE	TRUE	TRUE	TRUE	FALSE	5276226.653	15897000	0.331900777	23513	SCRIB
A0A0H3W5T2;B4DNC7;A8K5K3;O75030-10;O75030-9;O75030-12;O75030-4;O75030-3;O75030-8;O75030-7;O75030-6;O75030-2;O75030-5;O75030;O75030-11;C9JBI8	MITF	36	5	13.5	10	0	13.563	10886000	6017200	0	9671300	4482000	0	7205300	MITF	2385	10886000	6017200	2607483.81	9671300	4482000	1723061.76	FALSE	FALSE	TRUE	FALSE	FALSE	TRUE	6732796.762	1723061.76	3.907461077	4286	MITF
A0A0J9YWB6;Q9Y5B0-4;Q9Y5B0;A0A0J9YWJ4;K7EJD2	CTDP1	5	4	6.5	4	0	5.704	2178900	0	4980400	2825500	0	0	817060	CTDP1	3874	2178900	5882801.811	4980400	2825500	2534288.503	1501086.761	FALSE	TRUE	FALSE	FALSE	TRUE	TRUE	3680378.063	1501086.761	2.451809022	9150	CTDP1
A0A0J9YWL0;Q9Y4K1;B7ZAH2;Q9Y4K1-2;Q96QW7;Q6P5P8;B4DLI1	AIM1	7	4	2.9	5	0	11.267	0	0	5996000	5141800	9721500	0	248960	AIM1	4190	1456880.356	1443734.625	5996000	5141800	9721500	1576781.707	TRUE	TRUE	FALSE	FALSE	FALSE	TRUE	4751982.996	1576781.707	3.01372281	202	CRYBG1
B4DKM6;A0A0J9YXF2;J3QT77;A0A0J9YYG4;B4DW02;Q15165-3;Q15165-1;Q15165	PON2	13	5	22	18	0	17.809	15899000	13575000	13172000	10046000	7073400	11577000	12911000	PON2	1918	15899000	13575000	13172000	10046000	7073400	11577000	FALSE	FALSE	FALSE	FALSE	FALSE	FALSE	11953080	11577000	1.0324851	5445	PON2
A0A0K0K1H7;A2A274;Q99798;B4DZ08;B2RBW5;B4DLY4;B4DJW1;Q71UF1;B4DEC3;B4DW08	ACO2	11	36	55.8	192	0	323.31	429030000	300540000	313510000	320980000	249730000	184970000	167140000	ACO2	364	429030000	300540000	313510000	320980000	249730000	184970000	FALSE	FALSE	FALSE	FALSE	FALSE	FALSE	322758000	184970000	1.744920798	50	ACO2;HEL-S-284
A0A0K0K1K4;O14818;Q05DH1;O14818-2;H0UI83;H0Y586;O14818-4	PSMA7;hCG_41772	14	16	62.5	103	0	227.18	227300000	261590000	217530000	208070000	2.66E+08	184140000	279450000	PSMA7	226	227300000	261590000	217530000	208070000	2.66E+08	184140000	FALSE	FALSE	FALSE	FALSE	FALSE	FALSE	236098000	184140000	1.282165743	5688	PSMA7;HEL-S-276
A0A0K0K1K7;O95336;M0R261;M0R1L2;M0R0U3	PGLS	5	12	65.5	76	0	69.866	33451000	42634000	108620000	118550000	114130000	59416000	82100000	PGLS	672	33451000	42634000	108620000	118550000	114130000	59416000	FALSE	FALSE	FALSE	FALSE	FALSE	FALSE	83477000	59416000	1.40495826	25796	PGLS;HEL-S-304
A0A0K0K1L8;Q06323;Q6FHU3;Q06323-3;Q06323-2	PSME1	8	17	58.6	86	0	94.241	115780000	172270000	130240000	102350000	91575000	167450000	167250000	PSME1	363	115780000	172270000	130240000	102350000	91575000	167450000	FALSE	FALSE	FALSE	FALSE	FALSE	FALSE	122443000	167450000	0.73122126	5720	HEL-S-129m;PSME1
G1UI17;A0A0S2A4E4;A0A0M4G3H8;P35573;P35573-2;P35573-3	AGL	6	8	7.4	12	0	18.413	4550200	4195800	7660600	9604900	6913600	3012000	1371900	AGL	3627	4550200	4195800	7660600	9604900	6913600	3012000	FALSE	FALSE	FALSE	FALSE	FALSE	FALSE	6585020	3012000	2.18626162	178	AGL
A0A0R4J2E8;A8MXP9;P43243;D6REM6;Q68D11;D6R991	MATR3;DKFZp686K23100	26	34	49.2	212	0	260.51	321520000	363210000	318440000	362120000	315640000	291970000	149770000	MATR3	406	321520000	363210000	318440000	362120000	315640000	291970000	FALSE	FALSE	FALSE	FALSE	FALSE	FALSE	336186000	291970000	1.151440216	9782	MATR3
A0A0R4J2G3;Q6PIU2;A0A0A0MTJ9;Q6PIU2-2;Q6PIU2-3;H7C046	NCEH1	7	13	38.6	41	0	55.127	4148900	19518000	14597000	8689200	15010000	194350000	36461000	NCEH1	1180	4148900	19518000	14597000	8689200	15010000	194350000	FALSE	FALSE	FALSE	FALSE	FALSE	FALSE	12392620	194350000	0.063764446	57552	NCEH1
B2WTI3;B2WTI4;K7EJU9;A0A0S2PZM4;Q6NYC1-2;Q6NYC1;Q6NYC1-3	JMJD6	7	6	29	14	0	22.868	13014000	5383900	9314400	8319400	11058000	6319800	11023000	JMJD6	2035	13014000	5383900	9314400	8319400	11058000	6319800	FALSE	FALSE	FALSE	FALSE	FALSE	FALSE	9417940	6319800	1.490227539	23210	JMJD6
A0A0S2Z2Z6;P08133;P08133-2;A8K3Q7;B7Z582;Q6ZP35;E7EMC6	ANXA6	15	2	68.1	12	0	323.31	11172000	12206000	13549000	0	9798300	7028700	4053900	A0A0S2Z2Z6	2874	11172000	12206000	13549000	2025682.571	9798300	7028700	FALSE	FALSE	FALSE	TRUE	FALSE	FALSE	9750196.514	7028700	1.387197706	309	ANXA6
B7Z9I1;B4DWX6;A0A0S2Z366;Q5T4U5;Q5HYG7;P11310;P11310-2;B4DVB1;B4DJE7;B4DVE0;A0A0S2Z3A5	ACADM;DKFZp686M24262	14	15	42.9	66	0	102.86	118330000	126150000	73432000	66669000	50678000	66417000	111450000	ACADM	517	118330000	126150000	73432000	66669000	50678000	66417000	FALSE	FALSE	FALSE	FALSE	FALSE	FALSE	87051800	66417000	1.310685517	34	ACADM;DKFZp686M24262
X5D767;A0A0S2Z381;P00813;A0A0S2Z3B9;F5GWI4;A0A0S2Z3T6;F5GXW0	ADA	7	4	13.5	7	0	6.4019	1717500	2748000	3308800	2621600	0	11001000	2376900	ADA	3254	1717500	2748000	3308800	2621600	2133956.32	11001000	FALSE	FALSE	FALSE	FALSE	TRUE	FALSE	2505971.264	11001000	0.227794861	100	ADA
A0A0S2Z3D5;P02649;J9ZVQ3;A0A0S2Z3V0;H0Y7L5;E9PEV4;E7ERP7	APOE	15	12	47.3	23	0	46.825	39126000	79342000	36054000	17541000	21526000	29161000	28626000	APOE	1346	39126000	79342000	36054000	17541000	21526000	29161000	FALSE	FALSE	FALSE	FALSE	FALSE	FALSE	38717800	29161000	1.327725387	348	APOE
A0A0S2Z3G9;O43707;O43707-2;Q96BG6;F5GXS2;O43707-3	ACTN4	21	47	74.2	468	0	323.31	896410000	1381600000	844130000	865090000	811300000	1657700000	400800000	ACTN4	168	896410000	1381600000	844130000	865090000	811300000	1657700000	FALSE	FALSE	FALSE	FALSE	FALSE	FALSE	959706000	1657700000	0.578938288	81	ACTN4
A0A0S2Z3H2;O96005;A0A0S2Z3H6;O96005-4;O96005-3	CLPTM1	8	10	18.2	30	0	27.368	21389000	23947000	11085000	14140000	15917000	25549000	20240000	CLPTM1	1592	21389000	23947000	11085000	14140000	15917000	25549000	FALSE	FALSE	FALSE	FALSE	FALSE	FALSE	17295600	25549000	0.676958002	1209	CLPTM1
A0A0S2Z3H3;P12235;A8K787;V9GYG0;A0A0S2Z359;A0A0S2Z3C4	SLC25A4	8	5	55	16	0	19.471	28409000	25216000	26835000	30342000	15236000	13751000	18865000	SLC25A4	1653	28409000	25216000	26835000	30342000	15236000	13751000	FALSE	FALSE	FALSE	FALSE	FALSE	FALSE	25207600	13751000	1.83314668	291	SLC25A4
A0A0S2Z3S5;A0A0S2Z3H8;P63092-3;P63092-2;P63092;P63092-4;Q5JWF2-2;Q5JWF2;B0AZR9;Q5FWY2;Q14455	GNAS;GSA	26	8	32.9	23	0	46.803	18916000	16467000	16224000	12420000	16343000	45564000	19238000	GNAS	1632	18916000	16467000	16224000	12420000	16343000	45564000	FALSE	FALSE	FALSE	FALSE	FALSE	FALSE	16074000	45564000	0.352778509	2778	GNAS;GSA
Q5T081;A0A0S2Z3I4;A0A0S2Z404;P18754;P18754-2;C9JW69;C9JRH2;C9JMJ4;C9J3R0;C9JQZ4	RCC1	10	11	39.7	65	0	100.78	50522000	52029000	54380000	65944000	49808000	50380000	46264000	RCC1	1024	50522000	52029000	54380000	65944000	49808000	50380000	FALSE	FALSE	FALSE	FALSE	FALSE	FALSE	54536600	50380000	1.082504962	1104	RCC1
A0A0S2Z3L0;P13804;A0A0S2Z3M4;P13804-2;H0YLU7;H0YL12;H0YK49;H0YNX6;H0YKF0	ETFA	12	14	60.1	84	0	130.5	77651000	122010000	189690000	166880000	145370000	168140000	109720000	ETFA	526	77651000	122010000	189690000	166880000	145370000	168140000	FALSE	FALSE	FALSE	FALSE	FALSE	FALSE	140320200	168140000	0.834543833	2108	ETFA
A0A0S2Z3L2;P16615;P16615-5;P16615-2;P16615-3;P16615-4;H7C5W9	ATP2A2	29	40	44.6	169	0	175.66	328070000	260330000	201840000	222940000	225180000	250500000	99800000	ATP2A2	572	328070000	260330000	201840000	222940000	225180000	250500000	FALSE	FALSE	FALSE	FALSE	FALSE	FALSE	247672000	250500000	0.988710579	488	ATP2A2
A0A0S2Z3P9;P45954-2;P45954	ACADSB	3	4	13.7	7	0	19.514	5265400	4307900	7248100	0	0	0	2600400	ACADSB	3183	5265400	4307900	7248100	2030701.445	4488819.203	1430948.16	FALSE	FALSE	FALSE	TRUE	TRUE	TRUE	4668184.129	1430948.16	3.262301361	36	ACADSB
L7RT18;A0A0S2Z3Q4;P46108;A0A0S2Z3K9;P46108-2;I3L297	CRK	6	6	20.7	17	0	16.131	11600000	9968900	25980000	16126000	19133000	23557000	15055000	CRK	1814.5	11600000	9968900	25980000	16126000	19133000	23557000	FALSE	FALSE	FALSE	FALSE	FALSE	FALSE	16561580	23557000	0.703042832	1398	CRK
A0A0S2Z3W7;Q9BY32;A0A0S2Z423;Q9BY32-3	ITPA	6	7	46.4	22	0	22.846	41423000	32479000	21826000	26950000	19842000	28855000	53423000	ITPA	920	41423000	32479000	21826000	26950000	19842000	28855000	FALSE	FALSE	FALSE	FALSE	FALSE	FALSE	28504000	28855000	0.98783573	3704	ITPA
A0A0S2Z3X8;P31150;B4DHX4;B4DH24	GDI1	7	12	62.6	55	0	55.725	38937000	85249000	41633000	35672000	43293000	91493000	49292000	GDI1	976	38937000	85249000	41633000	35672000	43293000	91493000	FALSE	FALSE	FALSE	FALSE	FALSE	FALSE	48956800	91493000	0.53508793	2664	GDI1
A0A0S2Z3Y1;Q08380;B4DVE1;B3KP88;B4DDG4;B4DI70;B4DWA8	LGALS3BP	16	15	35.6	55	0	144.75	25493000	72099000	94629000	76420000	99059000	57921000	52264000	LGALS3BP	933	25493000	72099000	94629000	76420000	99059000	57921000	FALSE	FALSE	FALSE	FALSE	FALSE	FALSE	73540000	57921000	1.2696604	3959	LGALS3BP
A0A0S2Z444;A0A0S2Z3Y3;A0A0S2Z3Z1;A0A0S2Z462;P52594-2;P52594-3;P52594;P52594-4;B4DHC5;A0A024R458;B8ZZY2;C9J2I0	AGFG1;HRB	12	5	11.9	10	0	62.072	9750200	17332000	0	0	0	6758300	11412000	AGFG1	2011	9750200	17332000	1771837.414	3703849.661	2655608.844	6758300	FALSE	FALSE	TRUE	TRUE	TRUE	FALSE	7042699.184	6758300	1.042081468	3267	AGFG1;HRB
A0A0S2Z410;Q99714;Q99714-2;Q5H928;A0A0S2Z434	HSD17B10	5	16	79.3	109	0	149.91	62150000	87476000	100770000	96232000	93545000	113140000	112190000	HSD17B10	511	62150000	87476000	100770000	96232000	93545000	113140000	FALSE	FALSE	FALSE	FALSE	FALSE	FALSE	88034600	113140000	0.778103235	3028	HSD17B10
A0A0S2Z430;Q16822;Q6IB91;B4DW73;H0YML5;A0A0S2Z4C0;A0A0S2Z451;H0YM31	PCK2	16	16	29.5	34	0	43.387	28063000	14012000	37889000	35644000	33939000	46455000	14695000	PCK2	1832	28063000	14012000	37889000	35644000	33939000	46455000	FALSE	FALSE	FALSE	FALSE	FALSE	FALSE	29909400	46455000	0.64383597	5106	PCK2
H0Y9M8;A0A0S2Z433;O43181	NDUFS4	3	1	12.9	9	0	8.3058	5476600	8933500	12539000	0	0	4842400	27013000	NDUFS4	1387	5476600	8933500	12539000	2157956.699	3687808.646	4842400	FALSE	FALSE	FALSE	TRUE	TRUE	FALSE	6558973.069	4842400	1.354488078	4724	NDUFS4
A0A0S2Z489;O00232;O00232-2;A0A0S2Z476	PSMD12	4	19	46.3	88	0	97.883	70480000	77529000	106710000	110710000	127480000	96146000	65801000	PSMD12	796	70480000	77529000	106710000	110710000	127480000	96146000	FALSE	FALSE	FALSE	FALSE	FALSE	FALSE	98581800	96146000	1.025334387	5718	PSMD12
A0A0S2Z491;P06748;A0A140VJQ2;A4ZU86;P06748-3;A0A0S2Z4G7;P06748-2;Q9BTI9	NPM1	13	8	52.7	75	0	323.31	8.41E+08	875740000	637620000	901900000	868990000	439210000	1174200000	NPM1	35	841000000	875740000	637620000	901900000	868990000	439210000	FALSE	FALSE	FALSE	FALSE	FALSE	FALSE	825050000	439210000	1.878486373	4869	NPM1
B2RBA6;A0A0S2Z4A5;P33993;C6EMX8;B3KUD7;B4DDF5;P33993-3;Q9H4N9	MCM7	11	27	47.1	134	0	197.06	104730000	59516000	149820000	182920000	167710000	192580000	53943000	MCM7	915	104730000	59516000	149820000	182920000	167710000	192580000	FALSE	FALSE	FALSE	FALSE	FALSE	FALSE	132939200	192580000	0.690306366	4176	MCM7
A0A0S2Z4B5;A0A0S2Z4C6;Q08209-3;Q08209-2;Q08209;E9PPC8;E9PK68;E7ETC2;Q08209-5	PPP3CA	23	7	13.3	19	0	15.9	17794000	14959000	14047000	14807000	14796000	34432000	15364000	PPP3CA	1804	17794000	14959000	14047000	14807000	14796000	34432000	FALSE	FALSE	FALSE	FALSE	FALSE	FALSE	15280600	34432000	0.44379066	5530	PPP3CA
D3DVH1;A0A0S2Z4C9;B4DEL5;Q6IAQ2;A0A0S2Z4B7;Q99643-5;Q99643-3;Q99643	SDHC	8	2	20	16	0	6.1728	12588000	11845000	12328000	10661000	9814500	11750000	40529000	SDHC	1116	12588000	11845000	12328000	10661000	9814500	11750000	FALSE	FALSE	FALSE	FALSE	FALSE	FALSE	11447300	11750000	0.974238298	6391	SDHC
A0A0S2Z4C3;P07954-2;P07954	FH	8	22	56.7	127	0	323.31	255610000	217520000	215930000	199500000	209850000	214670000	163650000	FH	371	255610000	217520000	215930000	199500000	209850000	214670000	FALSE	FALSE	FALSE	FALSE	FALSE	FALSE	219682000	214670000	1.023347464	2271	FH
A0A0S2Z4C5;P04271	S100B	3	3	40.2	10	0	76.316	2930900	138540000	6408500	7345000	12692000	3449200	183500000	S100B	331	2930900	138540000	6408500	7345000	12692000	3449200	FALSE	FALSE	FALSE	FALSE	FALSE	FALSE	33583280	3449200	9.736541807	6285	S100B
A0A0S2Z4H2;P23297;Q5T7Y6	S100A1	5	5	48.9	26	0	94.076	234240000	523960000	111520000	77900000	72423000	0	1378100000	S100A1	26.5	234240000	523960000	111520000	77900000	72423000	2654380.372	FALSE	FALSE	FALSE	FALSE	FALSE	TRUE	204008600	2654380.372	76.85733445	6271	S100A1
B2R659;A0A0S2Z4J1;P51659;E7EWE5;B4DDM5;P51659-3;P51659-2;E7ER27;B4DSD0;G5E9S2;B3KSP2;E7ET17;Q59H27	HSD17B4	17	8	42	45	0	134.59	42197000	37663000	50783000	48784000	46323000	38589000	19019000	HSD17B4	1640	42197000	37663000	50783000	48784000	46323000	38589000	FALSE	FALSE	FALSE	FALSE	FALSE	FALSE	45150000	38589000	1.170022545	3295	HSD17B4
Q6UWH2;A0A0S2Z4J3;O14521-2;O14521;H0YD96;H0YD41;G3V173;E9PK73;H3BRW5;O14521-4	UNQ5809;SDHD	10	2	10.7	8	0.00052206	3.6877	6640100	7684300	10875000	0	0	0	19836000	UNQ5809	1605	6640100	7684300	10875000	4134291.476	3364189.432	3212640.316	FALSE	FALSE	FALSE	TRUE	TRUE	TRUE	6539576.182	3212640.316	2.035576827	6392	SDHD
H3BV55;B2R6D4;A0A0S2Z4J6;O15305;H3BRM0;B7Z922;B7Z3M6;B7Z419;H3BPH4;B7Z6A1;O15305-2	PMM2	17	4	20.1	10	0	12.188	9294900	10361000	0	7588600	0	9672000	11526000	PMM2	2002	9294900	10361000	2220836.489	7588600	1726988.571	9672000	FALSE	FALSE	TRUE	FALSE	TRUE	FALSE	6238465.012	9672000	0.645002586	5373	PMM2
A0A0S2Z4R1;P54577;A0A0C4DGZ5	YARS	4	27	57.2	131	0	134.24	126260000	149530000	125280000	169070000	143680000	169480000	73882000	YARS	730	126260000	149530000	125280000	169070000	143680000	169480000	FALSE	FALSE	FALSE	FALSE	FALSE	FALSE	142764000	169480000	0.842364881	8565	YARS
B4E1E2;A0A0S2Z4R4;O14964;A0A0S2Z4Q4;O14964-2;B4DFP5;I3L1P5	HGS	10	14	19.8	51	0	37.092	46239000	58579000	54105000	49145000	61389000	52768000	35326000	HGS	1205	46239000	58579000	54105000	49145000	61389000	52768000	FALSE	FALSE	FALSE	FALSE	FALSE	FALSE	53891400	52768000	1.021289418	9146	HGS
Q53HJ4;B2R7C5;A0A0S2Z4T1;P25205;P25205-2;B4DUQ9;J3KQ69;A0A0S2Z492;Q8NHX6;B4DS46	MCM3;HCC5	11	30	42.9	127	0	173.95	162390000	101140000	160490000	179030000	179070000	222340000	48965000	MCM3	982	162390000	101140000	160490000	179030000	179070000	222340000	FALSE	FALSE	FALSE	FALSE	FALSE	FALSE	156424000	222340000	0.703535126	4172	MCM3;HCC5
A0A0S2Z4V6;O76024	WFS1	5	6	6.5	9	0	11.541	2628000	2880800	0	3162100	3542500	12609000	1861000	WFS1	3414	2628000	2880800	3101233.458	3162100	3542500	12609000	FALSE	FALSE	TRUE	FALSE	FALSE	FALSE	3062926.692	12609000	0.242915909	7466	WFS1
A0A0S2Z4W1;A9Z1X7;B7Z7U0;A0A0S2Z4Z6;Q8IYB3-2;Q8IYB3;E9PCT1;M0R088	SRRM1	11	7	11.8	13	0	14.284	15091000	17934000	20376000	26649000	23845000	19529000	7754200	SRRM1	2321	15091000	17934000	20376000	26649000	23845000	19529000	FALSE	FALSE	FALSE	FALSE	FALSE	FALSE	20779000	19529000	1.064007374	10250	SRRM1
A0A0S2Z4Y4;Q14677;A0A0S2Z5H3;Q14677-3;Q14677-2	CLINT1	7	11	22.6	38	0	52.519	32584000	31629000	19110000	21706000	25953000	20846000	25152000	CLINT1	1442	32584000	31629000	19110000	21706000	25953000	20846000	FALSE	FALSE	FALSE	FALSE	FALSE	FALSE	26196400	20846000	1.256663149	9685	CLINT1
A0A0S2Z4Y5;Q5QPK2;H0Y368;O60762	DPM1	6	7	34.6	26	0	23.355	22056000	11965000	13122000	12661000	7738200	18484000	19093000	DPM1	1637	22056000	11965000	13122000	12661000	7738200	18484000	FALSE	FALSE	FALSE	FALSE	FALSE	FALSE	13508440	18484000	0.730818005	8813	DPM1
A0A0S2Z4Z0;Q96PK6	RBM14	13	17	33.9	53	0	70.621	68196000	64014000	74212000	72971000	68958000	82662000	51529000	RBM14	944	68196000	64014000	74212000	72971000	68958000	82662000	FALSE	FALSE	FALSE	FALSE	FALSE	FALSE	69670200	82662000	0.842832257	10432	RBM14
A8K525;A0A0S2Z4Z9;Q15233;Q15233-2;H7C367;C9JYS8	NONO	9	21	44.2	156	0	171.81	170030000	202460000	435610000	383480000	474240000	245970000	246220000	NONO	256	170030000	202460000	435610000	383480000	474240000	245970000	FALSE	FALSE	FALSE	FALSE	FALSE	FALSE	333164000	245970000	1.354490385	4841	NONO
B7ZA56;B4E184;A0A0S2Z500;Q96CV9-3;Q96CV9-2;Q96CV9;A0A0S2Z5I6	OPTN	8	4	9	10	0	8.1795	7003800	5580300	5036800	4939000	4871100	4790800	2881700	OPTN	3114	7003800	5580300	5036800	4939000	4871100	4790800	FALSE	FALSE	FALSE	FALSE	FALSE	FALSE	5486200	4790800	1.14515321	10133	OPTN
Q5JRI1;Q53GD7;A0A0S2Z504;O75494-5;O75494-4;O75494-6;O75494-3;O75494-2;O75494;Q8WXF0	SRSF10;SRSF12	11	4	28.5	29	0	47.983	21245000	28163000	21300000	21379000	21024000	21452000	47091000	SRSF10	1005	21245000	28163000	21300000	21379000	21024000	21452000	FALSE	FALSE	FALSE	FALSE	FALSE	FALSE	22622200	21452000	1.054549692	10772	SRSF10;SRSF12
A0A0S2Z5D2;A0A0S2Z563;A0A0S2Z5H0;Q9Y2Q9;H0YAT2;H7C5V3;Q53G62;E5RGC7	MRPS28	11	3	26.5	6	0	6.5533	16929000	9694600	0	0	7268600	4730200	15215000	MRPS28	1808	16929000	9694600	3736010.271	3192123.882	7268600	4730200	FALSE	FALSE	TRUE	TRUE	FALSE	FALSE	8164066.831	4730200	1.725945379	28957	MRPS28
K7EQ55;K7EK33;A0A0S2Z569;Q96EP5-2;Q96EP5;K7EQ02;Q5IRN2	DAZAP1;DAZAP1/MEF2D fusion	8	7	25.9	34	0	57.095	26459000	28029000	39536000	39841000	45585000	55462000	54772000	DAZAP1	905	26459000	28029000	39536000	39841000	45585000	55462000	FALSE	FALSE	FALSE	FALSE	FALSE	FALSE	35890000	55462000	0.647109733	26528	DAZAP1
A0A0S2Z583;Q8TC12;Q8TC12-2;A0A0S2Z575;G3V2G6;G3V234;B3KQ19;Q8TC12-3	RDH11	11	9	38.7	28	0	52.782	15938000	24279000	35269000	27809000	26153000	15766000	21683000	RDH11	1537	15938000	24279000	35269000	27809000	26153000	15766000	FALSE	FALSE	FALSE	FALSE	FALSE	FALSE	25889600	15766000	1.642115946	51109	RDH11
A0A0S2Z590;O15116;E5RJ47;E5RH18	LSM1	4	3	30.1	18	0	11.666	11149000	9071100	9607500	8311900	5169600	14037000	31697000	LSM1	1275	11149000	9071100	9607500	8311900	5169600	14037000	FALSE	FALSE	FALSE	FALSE	FALSE	FALSE	8661820	14037000	0.617070599	27257	LSM1
B7Z7P4;X5CKB3;Q6QWC1;Q6QWC0;B2R9F3;A0A140T9T7;A0A0S2Z5A6;Q03518;A0A0S2Z4R8	TAP1	9	2	4.6	4	0	8.9077	5727400	3945900	0	0	0	2945900	2853100	TAP1	3123	5727400	3945900	2484255.708	4210963.178	1849963.962	2945900	FALSE	FALSE	TRUE	TRUE	TRUE	FALSE	3643696.57	2945900	1.23687042	6890	TAP1
A0A0S2Z5B3;M0QXB5;O95571;A0A0S2Z580;B2RCZ7	ETHE1	8	8	42.9	27	0	24.018	7040000	18792000	26191000	9319000	12486000	69667000	34801000	ETHE1	1219	7040000	18792000	26191000	9319000	12486000	69667000	FALSE	FALSE	FALSE	FALSE	FALSE	FALSE	14765600	69667000	0.211945397	23474	ETHE1
A0A0S2Z5B8;A0A0S2Z5D4;Q9UJW0;Q9UJW0-3;Q9UJW0-2	DCTN4	12	4	15	3	0	19.934	0	0	7748300	7213700	9441200	5349300	5125900	DCTN4	2688	2296100.467	1990945.64	7748300	7213700	9441200	5349300	TRUE	TRUE	FALSE	FALSE	FALSE	FALSE	5738049.221	5349300	1.072672914	51164	DCTN4
A0A0S2Z5C3;Q9NWT1	PAK1IP1	2	2	6.9	2	0.0041322	2.8283	0	0	2875900	3066700	3572300	0	1396400	PAK1IP1	3610	1120489.49	2272759.021	2875900	3066700	3572300	2990290.513	TRUE	TRUE	FALSE	FALSE	FALSE	TRUE	2581629.702	2990290.513	0.863337422	55003	PAK1IP1
B4DY59;E9PF19;B4DY50;A0A0S2Z5F3;Q8N2L6;B2RB52;Q9Y4P3;Q96E41	TBL2	10	5	17	19	0	37.667	8132100	9543000	8540200	12990000	11109000	11536000	8610300	TBL2	2238	8132100	9543000	8540200	12990000	11109000	11536000	FALSE	FALSE	FALSE	FALSE	FALSE	FALSE	10062860	11536000	0.872300624	26608	TBL2
Q53FV3;B3KM48;A0A0S2Z5H7;Q9BT78;D6RFN0;D6RAX7;Q9BT78-2;D6RD63	COPS4	9	14	42.1	47	0	68.512	38036000	38735000	45293000	46723000	46257000	48173000	29595000	COPS4	1313	38036000	38735000	45293000	46723000	46257000	48173000	FALSE	FALSE	FALSE	FALSE	FALSE	FALSE	43008800	48173000	0.892798871	51138	COPS4
A0A0S2Z5J4;O00203-3;O00203;A8K586;Q3MNE1;A0A0S2Z4Z4;B4E0B2	AP3B1	14	18	18.1	69	0	72.433	80072000	67041000	63420000	57239000	58516000	59914000	19885000	AP3B1	1604	80072000	67041000	63420000	57239000	58516000	59914000	FALSE	FALSE	FALSE	FALSE	FALSE	FALSE	65257600	59914000	1.089187836	8546	AP3B1
A0A0S2Z5K6;A0A0S2Z6B4;D6REA1;Q9H173	SIL1	6	4	12.1	10	0	10.327	0	0	4659300	5158600	6181500	4328600	6434000	SIL1	2473	2421601.986	2666478.776	4659300	5158600	6181500	4328600	TRUE	TRUE	FALSE	FALSE	FALSE	FALSE	4217496.152	4328600	0.974332614	64374	SIL1
A0A0S2Z5L0;Q9BRX5;A0A0S2Z5P2;Q9BRX5-3	GINS3	7	3	14.8	7	0	4.8945	2227100	2084200	0	0	0	3367400	2805300	GINS3	3132	2227100	2084200	2222176.662	1674586.579	2456220.222	3367400	FALSE	FALSE	TRUE	TRUE	TRUE	FALSE	2132856.693	3367400	0.633383825	64785	GINS3
B4DRU9;A0A0S2Z5L1;Q9NUQ8-2;Q9NUQ8	ABCF3	5	6	12.1	14	0	16.571	6622900	6984100	5226800	5735000	7532300	6030000	2984400	ABCF3	3093	6622900	6984100	5226800	5735000	7532300	6030000	FALSE	FALSE	FALSE	FALSE	FALSE	FALSE	6420220	6030000	1.064713101	55324	ABCF3
B3KQF0;A0A0S2Z5M1;Q9UGP8;B3KNE7	SEC63	7	8	12.5	13	0	19.641	13400000	21682000	11369000	14348000	15770000	13642000	6512600	SEC63	2464	13400000	21682000	11369000	14348000	15770000	13642000	FALSE	FALSE	FALSE	FALSE	FALSE	FALSE	15313800	13642000	1.122548013	11231	SEC63
G5E9D5;B3KT00;B4DT15;A0A0S2Z5M8;Q9BQ52-4;Q9BQ52;B3KSU9;B4E365;E7ES68;Q9BQ52-3	ELAC2	18	8	11.9	12	0	15.68	13022000	9171600	11866000	19777000	13802000	9829100	5867600	ELAC2	2559	13022000	9171600	11866000	19777000	13802000	9829100	FALSE	FALSE	FALSE	FALSE	FALSE	FALSE	13527720	9829100	1.376292845	60528	ELAC2
A0A0S2Z5P5;Q9BTE3-2;Q9BTE3;Q9BTE3-3	MCMBP	5	11	20.3	20	0	25.619	11597000	5790700	9675600	14024000	10304000	7587700	4722500	MCMBP	2744	11597000	5790700	9675600	14024000	10304000	7587700	FALSE	FALSE	FALSE	FALSE	FALSE	FALSE	10278260	7587700	1.354594937	79892	MCMBP
A0A0S2Z5Q3;J3KQJ1;Q8NBJ7;A0A0S2Z548;C9JL30;A8MXB9;C9J660;A0A024RDK8;B4DLK7;H7C3B2;Q75LP3;F8WA42;Q8NBJ7-2;Q8NBJ7-3;E9PBT8;B4DQ27;A0A0S2Z5C4;J3QT17;Q8NBJ7-5	SUMF2;DKFZP566I1024	25	8	34.2	32	0	71.94	41995000	48526000	24620000	20850000	21516000	21828000	41291000	SUMF2	1101	41995000	48526000	24620000	20850000	21516000	21828000	FALSE	FALSE	FALSE	FALSE	FALSE	FALSE	31501400	21828000	1.443164743	25870	SUMF2;DKFZP566I1024
A0A0S2Z5U1;Q8N183;A0A0S2Z5U2	NDUFAF2	7	7	49.1	16	0	16.754	6609900	9898100	15125000	13946000	9188900	9564300	16296000	NDUFAF2	1753	6609900	9898100	15125000	13946000	9188900	9564300	FALSE	FALSE	FALSE	FALSE	FALSE	FALSE	10953580	9564300	1.145256841	91942	NDUFAF2
B7WPG3;C9IYN3;A8K894;D6W592;A0A0S2Z6K1;A0A0S2Z5U3;Q8WVV9-5;Q8WVV9-4;Q8WVV9;H7C464	HNRNPLL;HNRPLL	15	11	32.3	20	0	24.861	11686000	12005000	14847000	15354000	10400000	17935000	8566500	HNRNPLL	2241	11686000	12005000	14847000	15354000	10400000	17935000	FALSE	FALSE	FALSE	FALSE	FALSE	FALSE	12858400	17935000	0.716944522	92906	HNRPLL;HNRNPLL
A0A0S2Z5U6;Q96C36;A0A087WTV6;A0A024R3Q9;A0A087WZR9;B3KMB7;Q4W8W1;J3KR12;B4DQK8	PYCR2;P5CR2	13	8	37.5	25	0	26.216	22400000	8256700	21355000	35613000	24804000	28529000	25775000	PYCR2	1427	22400000	8256700	21355000	35613000	24804000	28529000	FALSE	FALSE	FALSE	FALSE	FALSE	FALSE	22485740	28529000	0.788171334	29920	PYCR2;P5CR2
A0A0S2Z5V7;Q8TCT9-5;Q8TCT9;Q8TCT9-2;A0A075B6F6;A0A0S2Z6F0;Q8TCT9-4	HM13	8	10	25.5	47	0	46.224	35077000	67585000	42070000	43955000	56623000	76664000	79478000	HM13	689	35077000	67585000	42070000	43955000	56623000	76664000	FALSE	FALSE	FALSE	FALSE	FALSE	FALSE	49062000	76664000	0.63996139	81502	HM13
A0A0S2Z5X7;I3L3B4;F8W9H0;A0A0S2Z6I4;E9PLN8;Q9BQB6-3;Q9BQB6-2;Q9BQB6;A0A0B5EEB2;E2DSP6	VKORC1	10	2	26.1	9	0	64.141	21455000	11325000	23531000	0	38954000	0	55832000	VKORC1	896	21455000	11325000	23531000	2434559.131	38954000	1579472.111	FALSE	FALSE	FALSE	TRUE	FALSE	TRUE	19539911.83	1579472.111	12.3711661	79001	VKORC1
B7ZAW3;B4DH16;G5E9X5;B4DHW5;Q68D27;F5GYT8;E9PG35;E9PHF7;A0A0S2Z693;Q96RQ3	MCCC1;DKFZp686B20267	10	2	11.9	7	0	5.8281	0	4291300	0	0	3872400	3022000	6094400	MCCC1	2516	2302183.801	4291300	1583880.097	1669186.699	3872400	3022000	TRUE	FALSE	TRUE	TRUE	FALSE	FALSE	2743790.119	3022000	0.907938491	56922	MCCC1
A0A0U1RRM1;B3KSZ4;Q8WXI9;A0A0U1RR30	GATAD2B	12	3	5	7	0	31.797	8089700	7644400	7112800	0	7609200	0	3276800	GATAD2B	3026	8089700	7644400	7112800	3124543.659	7609200	3339697.252	FALSE	FALSE	FALSE	TRUE	FALSE	TRUE	6716128.732	3339697.252	2.010999269	57459	GATAD2B
A0A0U1ZFF6;A0A0U1ZI18;A0A0U1ZJB3;A0A0U1ZID9		4	2	6.1	5	0.0029506	2.9655	37527000	43974000	0	0	0	34291000	32121000	A0A0U1ZFF6	1268	37527000	43974000	1265989.226	2552378.189	1484532.427	34291000	FALSE	FALSE	TRUE	TRUE	TRUE	FALSE	17360779.97	34291000	0.506278031	NA
A0A0X1KG71;Q8WX92	NELFB	2	6	12.1	15	0	15.696	3747700	4249800	4405000	6130600	4072200	5210300	2713000	NELFB	3158	3747700	4249800	4405000	6130600	4072200	5210300	FALSE	FALSE	FALSE	FALSE	FALSE	FALSE	4521060	5210300	0.86771587	25920	NELFB
Q5U0A0;A0A109NGN6;P28066;P28066-2	PSMA5	4	9	46.5	77	0	72.914	143640000	153200000	144430000	163570000	174120000	144050000	269940000	PSMA5	239	143640000	153200000	144430000	163570000	174120000	144050000	FALSE	FALSE	FALSE	FALSE	FALSE	FALSE	155792000	144050000	1.081513363	5686	PSMA5
A0A140VJC9;O95372;Q5QPQ0	LYPLA2	8	5	33.8	18	0	45.122	14511000	12586000	20953000	23150000	14631000	15984000	22267000	LYPLA2	1518.5	14511000	12586000	20953000	23150000	14631000	15984000	FALSE	FALSE	FALSE	FALSE	FALSE	FALSE	17166200	15984000	1.073961461	11313	LYPLA2
Q86U79;A0A140VJE0;P55263-2;P55263;P55263-3;P55263-4	ADK	6	8	28.4	20	0	18.214	22173000	17645000	19186000	19243000	13507000	47547000	20009000	ADK	1600	22173000	17645000	19186000	19243000	13507000	47547000	FALSE	FALSE	FALSE	FALSE	FALSE	FALSE	18350800	47547000	0.385950743	132	ADK
A0A140VJE3;P50579-3;P50579;F8VRR3;F8VQZ7;P50579-2;Q96B43	METAP2	12	11	31.2	27	0	42.313	44309000	17953000	19290000	15134000	37433000	10402000	18703000	METAP2	1660	44309000	17953000	19290000	15134000	37433000	10402000	FALSE	FALSE	FALSE	FALSE	FALSE	FALSE	26823800	10402000	2.578715632	10988	METAP2
A0A140VJE4;P54802;Q59FD0;Q14769	NAGLU;ufHSD2	4	8	13.6	21	0	40.862	15454000	6634600	16784000	12734000	14038000	4083100	5739200	NAGLU	2579	15454000	6634600	16784000	12734000	14038000	4083100	FALSE	FALSE	FALSE	FALSE	FALSE	FALSE	13128920	4083100	3.215429453	4669	NAGLU;ufHSD2
Q8IY97;A0A140VJE7;B3KXW5;O43747;O43747-2;B4DS96;B4DDL1	AP1G1	14	15	18.4	52	0	41.675	38648000	43897000	45614000	60537000	48908000	45926000	25549000	AP1G1	1431	38648000	43897000	45614000	60537000	48908000	45926000	FALSE	FALSE	FALSE	FALSE	FALSE	FALSE	47520800	45926000	1.034725428	164	AP1G1
H0UID4;H0UID3;A8K916;A0A140VJE8;P63010;P63010-2;H0UID5;Q68DI0;A8K0G3;P63010-3;A0A087X253;B4DWG4;B4E261;A0A087WU93;A0A087WZQ6;A0A087WYD1	AP2B1;DKFZp781K0743	24	16	37.8	69	0	207.71	50868000	66101000	92826000	83193000	88550000	135460000	35948000	AP2B1	1192	50868000	66101000	92826000	83193000	88550000	135460000	FALSE	FALSE	FALSE	FALSE	FALSE	FALSE	76307600	135460000	0.563322014	163	AP2B1;DKFZp781K0743
A0A140VJF3;O43684-2;O43684;J3QT28;B4DDM6	BUB3	6	13	52.5	60	0	63.288	74204000	75925000	61821000	67620000	92467000	76604000	88389000	BUB3	621	74204000	75925000	61821000	67620000	92467000	76604000	FALSE	FALSE	FALSE	FALSE	FALSE	FALSE	74407400	76604000	0.971325257	9184	BUB3
A0A140VJF4;P53004	BLVRA	3	9	34.8	37	0	82.329	67113000	47941000	27664000	35283000	28273000	64267000	54483000	BLVRA	909	67113000	47941000	27664000	35283000	28273000	64267000	FALSE	FALSE	FALSE	FALSE	FALSE	FALSE	41254800	64267000	0.641928206	644	BLVRA
A0A140VJG8;P21964-2;P21964;B8XPJ7;B8XPJ8;E7EMS6;E7EUU8	COMT	11	14	73.4	63	0	134.35	41705000	133850000	48311000	75671000	58501000	102590000	84171000	COMT	658	41705000	133850000	48311000	75671000	58501000	102590000	FALSE	FALSE	FALSE	FALSE	FALSE	FALSE	71607600	102590000	0.697997856	1312	COMT
A0A140VJI5;Q9BVJ7	DUSP23	2	6	40	9	0	11.698	11577000	15528000	6672500	0	0	7762200	14088000	DUSP23	1861	11577000	15528000	6672500	2152106.553	3081525.906	7762200	FALSE	FALSE	FALSE	TRUE	TRUE	FALSE	7802226.492	7762200	1.005156591	54935	DUSP23
A0A140VJI7;Q16610;Q16610-4;C8CHS3	ECM1	7	12	25.2	16	0	52.898	58574000	6025100	2928200	0	5697100	5535300	11602000	ECM1	1996	58574000	6025100	2928200	4500510.502	5697100	5535300	FALSE	FALSE	FALSE	TRUE	FALSE	FALSE	15544982.1	5535300	2.808335971	1893	ECM1
A0A140VJJ2;P10768;X6RA14;H7BZT7	ESD	5	10	46.8	46	0	49.402	96108000	113590000	60205000	90775000	79847000	95948000	112130000	ESD	513	96108000	113590000	60205000	90775000	79847000	95948000	FALSE	FALSE	FALSE	FALSE	FALSE	FALSE	88105000	95948000	0.918257806	2098	ESD
A0A140VJK1;O76003	GLRX3	2	12	48.1	67	0	323.31	53027000	57621000	83242000	88653000	87376000	44957000	62231000	GLRX3	827	53027000	57621000	83242000	88653000	87376000	44957000	FALSE	FALSE	FALSE	FALSE	FALSE	FALSE	73983800	44957000	1.645656961	10539	GLRX3
A0A140VJK2;P43304;Q53T76;A8K1Z2;P43304-2;B7Z601	GPD2	12	28	50.5	91	0	104.67	90222000	109170000	96473000	98093000	107780000	72605000	38926000	GPD2	1139	90222000	109170000	96473000	98093000	107780000	72605000	FALSE	FALSE	FALSE	FALSE	FALSE	FALSE	100347600	72605000	1.382103161	2820	GPD2
A0A140VJK6;P49915;B4DUT7;P49915-2;Q53F90	GMPS	5	28	60.6	130	0	168.58	124830000	100140000	134290000	183200000	168050000	169550000	62895000	GMPS	823	124830000	100140000	134290000	183200000	168050000	169550000	FALSE	FALSE	FALSE	FALSE	FALSE	FALSE	142102000	169550000	0.838112651	8833	GMPS
Q6LET3;A0A140VJL3;P00492	HPRT1	4	10	63.3	73	0	125.54	31052000	47962000	73762000	82405000	77377000	97653000	101440000	HPRT1	563	31052000	47962000	73762000	82405000	77377000	97653000	FALSE	FALSE	FALSE	FALSE	FALSE	FALSE	62511600	97653000	0.640140088	3251	HPRT1
A0A140VJL6;Q2TAA2;H7C5G1;Q05D21;Q6NVV8;Q6PCA9;Q2TAA2-2	IAH1	9	5	27.4	5	0	12.746	1645800	7552100	0	0	0	3655600	5232400	IAH1	2667	1645800	7552100	1663447.227	2673577.723	1392042.403	3655600	FALSE	FALSE	TRUE	TRUE	TRUE	FALSE	2985393.47	3655600	0.816663057	285148	IAH1
B4E0H8;A0A140VJM0;P26006;P26006-1;Q59F03	ITGA3	10	19	21.3	52	0	105.62	9955300	39203000	15028000	0	8770600	230630000	37713000	ITGA3	1159	9955300	39203000	15028000	3703153.411	8770600	230630000	FALSE	FALSE	FALSE	TRUE	FALSE	FALSE	15332010.68	230630000	0.066478822	3675	ITGA3
A0A140VJN3;Q9H9A6	LRRC40	2	6	12.3	23	0	13.195	9192100	11951000	10133000	15165000	8717300	11351000	4973300	LRRC40	2705	9192100	11951000	10133000	15165000	8717300	11351000	FALSE	FALSE	FALSE	FALSE	FALSE	FALSE	11031680	11351000	0.971868558	55631	LRRC40
A0A140VJP2;Q9NZL9;Q9NZL9-4;Q9NZL9-2;A8K7A4;Q9NZL9-3;H7C0X7	MAT2B	9	5	42.2	15	0	35.496	21620000	24620000	19523000	20065000	20742000	39868000	20296000	MAT2B	1586	21620000	24620000	19523000	20065000	20742000	39868000	FALSE	FALSE	FALSE	FALSE	FALSE	FALSE	21314000	39868000	0.534614227	27430	MAT2B
A0A140VJP5;P31153;B4DEX8;P31153-2	MAT2A	7	12	44.8	77	0	80.42	52985000	105850000	95905000	120290000	96441000	103920000	90390000	MAT2A	610	52985000	105850000	95905000	120290000	96441000	103920000	FALSE	FALSE	FALSE	FALSE	FALSE	FALSE	94294200	103920000	0.907372979	4144	MAT2A
A0A140VJQ4;P04181;P04181-2	OAT	4	15	41.2	64	0	162.68	102050000	62543000	87829000	73858000	73631000	76435000	115660000	OAT	496	102050000	62543000	87829000	73858000	73631000	76435000	FALSE	FALSE	FALSE	FALSE	FALSE	FALSE	79982200	76435000	1.046408059	4942	OAT
F5GZ78;A0A140VJQ8;P49023-2;P49023;P49023-3;B3KVL0;B4DRY6;P49023-4;Q6ZQU7	PXN	14	10	21.9	25	0	59.955	16876000	27090000	18939000	17807000	15315000	24526000	15553000	PXN	1789	16876000	27090000	18939000	17807000	15315000	24526000	FALSE	FALSE	FALSE	FALSE	FALSE	FALSE	19205400	24526000	0.783062872	5829	PXN
J3K000;A0A140VJR2;P12955;P12955-3;P12955-2	PEPD	9	17	42.4	89	0	102.09	126880000	148250000	138540000	106120000	61504000	74896000	97233000	PEPD	579	126880000	148250000	138540000	106120000	61504000	74896000	FALSE	FALSE	FALSE	FALSE	FALSE	FALSE	116258800	74896000	1.552269814	5184	PEPD
Q8WZ56;Q5U0I7;B3KRM2;A0A140VJS0;P62714;B3KQ51	PPP2CB	14	2	56.6	7	0	123.33	9859100	8898500	0	0	0	5901200	7355000	PPP2CB	2368	9859100	8898500	3987998.443	3380637.07	4826331.976	5901200	FALSE	FALSE	TRUE	TRUE	TRUE	FALSE	6190513.498	5901200	1.049026215	5516	PPP2CB
A0A140VJS3;P62195-2;P62195;Q59GS3;J3QSA9;J3QQM1;J3KRP2;J3QLH6	PSMC5	13	24	64.5	117	0	288.81	121340000	118750000	127270000	141660000	159980000	110990000	91140000	PSMC5	608	121340000	118750000	127270000	141660000	159980000	110990000	FALSE	FALSE	FALSE	FALSE	FALSE	FALSE	133800000	110990000	1.20551401	5705	PSMC5
A0A140VJS6;P49721;B7Z478;A0A087WVV1;Q59FJ0	PSMB2	5	9	45.3	36	0	31.154	82381000	78091000	79268000	76719000	79747000	68911000	127470000	PSMB2	464	82381000	78091000	79268000	76719000	79747000	68911000	FALSE	FALSE	FALSE	FALSE	FALSE	FALSE	79241200	68911000	1.149906401	5690	PSMB2
A0A140VJT0;P63151;Q56VW8;P63151-2	PPP2R2A	26	7	30.6	29	0	128.27	32458000	24090000	16497000	20824000	20535000	25097000	21310000	PPP2R2A	1546	32458000	24090000	16497000	20824000	20535000	25097000	FALSE	FALSE	FALSE	FALSE	FALSE	FALSE	22880800	25097000	0.911694625	5520	PPP2R2A
Q5QPM7;A0A140VJT2;Q92530;Q5QPM9;B4DFK1;B4DUJ0	PSMF1	9	4	21.3	11	0	88.843	15939000	31039000	6662300	9767200	9209400	28395000	30463000	PSMF1	1294	15939000	31039000	6662300	9767200	9209400	28395000	FALSE	FALSE	FALSE	FALSE	FALSE	FALSE	14523380	28395000	0.511476668	9491	PSMF1
A0A140VJT8;P13489;A0A024RC87	RNH1	12	23	73.5	153	0	323.31	154930000	178810000	137440000	145120000	157530000	173770000	151940000	RNH1	401	154930000	178810000	137440000	145120000	157530000	173770000	FALSE	FALSE	FALSE	FALSE	FALSE	FALSE	154766000	173770000	0.890637049	6050	RNH1
A0A140VJU5;Q9Y371;A0A087WW40;Q9Y371-2	SH3GLB1	5	8	24.9	13	0	54.235	8330700	22985000	0	9524400	8793400	11634000	14722000	SH3GLB1	1831	8330700	22985000	3247359.369	9524400	8793400	11634000	FALSE	FALSE	TRUE	FALSE	FALSE	FALSE	10576171.87	11634000	0.909074426	51100	SH3GLB1
A0A140VJW5;P14868;D3DP78;P14868-2;Q53T60	DARS	11	30	68.1	171	0	173.54	210110000	213740000	262160000	253590000	228400000	381550000	129460000	DARS	459	210110000	213740000	262160000	253590000	228400000	381550000	FALSE	FALSE	FALSE	FALSE	FALSE	FALSE	233600000	381550000	0.612239549	1615	DARS
A0A140VJX1;P24752	ACAT1	6	15	42.6	73	0	144.35	88336000	93298000	121480000	108570000	85659000	60316000	62017000	ACAT1	829	88336000	93298000	121480000	108570000	85659000	60316000	FALSE	FALSE	FALSE	FALSE	FALSE	FALSE	99468600	60316000	1.64912461	38	ACAT1
A0A140VJX3;P25325;P25325-2;Q2VEU1;B1AH49;Q59HD5	MPST	7	8	35	18	0	28.725	18821000	8170300	29920000	25936000	22273000	15833000	20049000	MPST	1598	18821000	8170300	29920000	25936000	22273000	15833000	FALSE	FALSE	FALSE	FALSE	FALSE	FALSE	21024060	15833000	1.327863323	4357	MPST
A0A140VJY7;Q9BRA2;I3L2R6;I3L0K2;I3L3M7	TXNDC17	5	6	60.2	47	0	23.272	49527000	27869000	76314000	64549000	48272000	52173000	111120000	TXNDC17	518	49527000	27869000	76314000	64549000	48272000	52173000	FALSE	FALSE	FALSE	FALSE	FALSE	FALSE	53306200	52173000	1.021720047	84817	TXNDC17
A0A140VJZ1;P45974-2;P45974	USP5	8	19	29.7	62	0	148.04	53490000	61622000	51511000	58849000	42787000	63304000	29372000	USP5	1323	53490000	61622000	51511000	58849000	42787000	63304000	FALSE	FALSE	FALSE	FALSE	FALSE	FALSE	53651800	63304000	0.847526223	8078	USP5
A0A140VJZ4;P15374;A0A087WTB8;Q5TBK7	UCHL3	4	6	40	26	0	40.033	13967000	28178000	19019000	26346000	15298000	40051000	38018000	UCHL3	1151	13967000	28178000	19019000	26346000	15298000	40051000	FALSE	FALSE	FALSE	FALSE	FALSE	FALSE	20561600	40051000	0.513385434	7347	UCHL3
A0A140VK12;Q9UBF2;Q9H9B7;B3KND4;Q9UBF2-2;Q9NUP3	COPG2	8	13	24.3	27	0	48.092	10020000	20535000	19415000	24353000	16260000	0	4674300	COPG2	2754	10020000	20535000	19415000	24353000	16260000	1689630.974	FALSE	FALSE	FALSE	FALSE	FALSE	TRUE	18116600	1689630.974	10.72222294	26958	COPG2
A0A140VK13;P23786;Q53G79	CPT2	3	12	20.4	20	0	25.669	14810000	11650000	15015000	13896000	0	7333500	7247900	CPT2	2380.5	14810000	11650000	15015000	13896000	1943499.811	7333500	FALSE	FALSE	FALSE	FALSE	TRUE	FALSE	11462899.96	7333500	1.563087197	1376	CPT2
A0A140VK27;P09960;B4DVZ8;P09960-4;P09960-2;P09960-3	LTA4H	9	21	46	82	0	99.581	115180000	57711000	87085000	74410000	66992000	77482000	41049000	LTA4H	1107	115180000	57711000	87085000	74410000	66992000	77482000	FALSE	FALSE	FALSE	FALSE	FALSE	FALSE	80275600	77482000	1.036054826	4048	LTA4H
A0A140VK29;Q9HCC0;Q9HCC0-2;D6RD67;D6RDF7;A0A0S2Z5R4	MCCC2	9	8	18.5	12	0	20.275	15127000	17123000	16767000	16801000	16487000	10460000	10255000	MCCC2	2095	15127000	17123000	16767000	16801000	16487000	10460000	FALSE	FALSE	FALSE	FALSE	FALSE	FALSE	16461000	10460000	1.573709369	64087	MCCC2
A0A140VK39;Q9Y570;Q9Y570-4;Q9Y570-2	PPME1	5	13	37.3	37	0	80.47	25944000	20510000	19491000	25324000	20631000	38673000	34904000	PPME1	1216	25944000	20510000	19491000	25324000	20631000	38673000	FALSE	FALSE	FALSE	FALSE	FALSE	FALSE	22380000	38673000	0.578698317	51400	PPME1
A0A140VK41;P11908;P11908-2;B2R860	PRPS2	7	5	57.9	14	0	17.277	14501000	23597000	16507000	13357000	21822000	18931000	19316000	PRPS2	1627	14501000	23597000	16507000	13357000	21822000	18931000	FALSE	FALSE	FALSE	FALSE	FALSE	FALSE	17956800	18931000	0.948539433	5634	PRPS2
Q6IB71;A0A140VK43;P25788-2;P25788	PSMA3	7	13	43.1	73	0	44.457	118670000	143130000	124480000	129140000	117300000	119440000	176090000	PSMA3	346	118670000	143130000	124480000	129140000	117300000	119440000	FALSE	FALSE	FALSE	FALSE	FALSE	FALSE	126544000	119440000	1.059477562	5684	PSMA3
A0A140VK44;G3V5Z7;P60900;G3V295;G3V3I1;P60900-2;G3V3U4	PSMA6	13	13	56.1	88	0	74.043	144230000	159720000	179780000	171300000	175100000	178790000	223560000	PSMA6	278	144230000	159720000	179780000	171300000	175100000	178790000	FALSE	FALSE	FALSE	FALSE	FALSE	FALSE	166026000	178790000	0.928608983	5687	PSMA6
Q53FT8;A0A140VK45;P20618	PSMB1	4	8	43.2	64	0	173.62	101100000	125910000	118400000	116910000	146730000	120160000	154910000	PSMB1	390	101100000	125910000	118400000	116910000	146730000	120160000	FALSE	FALSE	FALSE	FALSE	FALSE	FALSE	121810000	120160000	1.013731691	5689	PSMB1
A0A140VK46;P28070;B4DFL3	PSMB4	3	7	39.4	40	0	56.589	73417000	75062000	77197000	66788000	77537000	87503000	123200000	PSMB4	477	73417000	75062000	77197000	66788000	77537000	87503000	FALSE	FALSE	FALSE	FALSE	FALSE	FALSE	74000200	87503000	0.845687576	5692	PSMB4
A0A140VK49;Q7KZF4;B2R5U1;Q59FF0;B3KU67;B4E299;I6TRR8	SND1	8	48	62.7	305	0	323.31	614790000	764220000	716020000	877990000	800030000	517600000	228240000	SND1	273	614790000	764220000	716020000	877990000	800030000	517600000	FALSE	FALSE	FALSE	FALSE	FALSE	FALSE	754610000	517600000	1.457901855	27044	SND1
A0A140VK53;Q9UQ35;O60382	SRRM2;KIAA0324	15	19	9.8	63	0	62.069	84823000	41970000	44604000	47292000	49568000	63236000	8236100	SRRM2	2276	84823000	41970000	44604000	47292000	49568000	63236000	FALSE	FALSE	FALSE	FALSE	FALSE	FALSE	53651400	63236000	0.848431273	23524	KIAA0324;SRRM2
C9JK83;A0A140VK54;O95630-2;O95630	STAMBP	7	3	12.6	3	0	4.7123	3167500	4470400	0	0	3149500	2228600	2981300	STAMBP	3095	3167500	4470400	2127839	1744588.151	3149500	2228600	FALSE	FALSE	TRUE	TRUE	FALSE	FALSE	2931965.43	2228600	1.315608647	10617	STAMBP
A0A140VK56;P37837;F2Z393	TALDO1	7	18	48.1	156	0	179.43	214260000	385770000	567360000	607160000	609840000	439370000	487510000	TALDO1	147	214260000	385770000	567360000	607160000	609840000	439370000	FALSE	FALSE	FALSE	FALSE	FALSE	FALSE	476878000	439370000	1.085367686	6888	TALDO1
A0A140VK65;P21281;Q59HF3;H0YC04;B4DFM5	ATP6V1B2	15	18	47.2	125	0	129.99	149410000	126180000	132490000	130340000	152370000	90997000	90220000	ATP6V1B2	612	149410000	126180000	132490000	130340000	152370000	90997000	FALSE	FALSE	FALSE	FALSE	FALSE	FALSE	138158000	90997000	1.518269833	526	ATP6V1B2
A0A140VK69;P17174;Q2TU84;P17174-2;B7Z1I2	GOT1;GIG18	5	18	59.8	123	0	160.39	198570000	137240000	169140000	154580000	137360000	93368000	125770000	GOT1	468	198570000	137240000	169140000	154580000	137360000	93368000	FALSE	FALSE	FALSE	FALSE	FALSE	FALSE	159378000	93368000	1.706987405	2805	GOT1
A0A140VK70;P35998;Q75L23;P35998-2	PSMC2	6	27	74.1	103	0	249.67	127530000	138330000	149340000	168990000	189560000	147760000	87087000	PSMC2	631	127530000	138330000	149340000	168990000	189560000	147760000	FALSE	FALSE	FALSE	FALSE	FALSE	FALSE	154750000	147760000	1.047306443	5701	PSMC2
A0A140VK73;Q9NPH2;Q9NPH2-2;Q9NPH2-3;B7Z3K3;B3KSG0	ISYNA1	10	9	20.8	30	0	36.632	48605000	7142800	17237000	26662000	19196000	23258000	22475000	ISYNA1	1512	48605000	7142800	17237000	26662000	19196000	23258000	FALSE	FALSE	FALSE	FALSE	FALSE	FALSE	23768560	23258000	1.021952017	51477	ISYNA1
C9JD73;C9J177;H7C003;A0A140VK83;Q15435-2;Q15435;B5MBZ8;Q15435-5;Q15435-4;Q15435-3	PPP1R7	12	6	25.9	18	0	59.737	7799600	9264200	11126000	13892000	17962000	13628000	11982000	PPP1R7	1968	7799600	9264200	11126000	13892000	17962000	13628000	FALSE	FALSE	FALSE	FALSE	FALSE	FALSE	12008760	13628000	0.881182859	5510	PPP1R7
Q6IBK3;A8K769;A0A140VK92;O15127;H3BV04;H3BN93;H3BUB6;H3BPL9;B3KU14	SCAMP2	9	3	12.2	11	0	13.248	5206500	12040000	13238000	13988000	12329000	15759000	35912000	SCAMP2	1193	5206500	12040000	13238000	13988000	12329000	15759000	FALSE	FALSE	FALSE	FALSE	FALSE	FALSE	11360300	15759000	0.720876959	10066	SCAMP2
F8W1A4;A0A140VK93;P54819-2;P54819;P54819-3;P54819-5;F8VZG5;F8VY04;P54819-6;B4DLK2;P54819-4;G3V213	AK2	13	13	76.3	99	0	66.666	103990000	120610000	152290000	156410000	118650000	111210000	158830000	AK2	381	103990000	120610000	152290000	156410000	118650000	111210000	FALSE	FALSE	FALSE	FALSE	FALSE	FALSE	130390000	111210000	1.172466505	204	AK2
A0A140VK94;P43487-2;P43487;F6WQW2;D3DX26;C9JXG8;C9JJ34;B7Z6U1;B4DE76	RANBP1	16	9	65.2	62	0	200.59	177170000	210970000	151990000	151650000	172930000	156200000	496710000	RANBP1	144	177170000	210970000	151990000	151650000	172930000	156200000	FALSE	FALSE	FALSE	FALSE	FALSE	FALSE	172942000	156200000	1.107183099	5902	RANBP1
B4E0U6;A0A140VKA6;P50502;Q0IJ56;A0A087X1H6;Q1XBU6;B7ZA40;H7C3I1;Q3KNR6;Q8NFI4;Q8IZP2;F6VDH7	ST13;ST13P5;ST13P4	15	10	30.6	101	0	107.35	183290000	266510000	249550000	324090000	336450000	101170000	348100000	ST13	179	183290000	266510000	249550000	324090000	336450000	101170000	FALSE	FALSE	FALSE	FALSE	FALSE	FALSE	271978000	101170000	2.688326579	6767	ST13;ST13P4;ST13P5
A0A140VKA9;P09417;P09417-2;B7Z415;D6RGG7	QDPR	7	11	61.1	55	0	182.86	27522000	102250000	186370000	142300000	75769000	23810000	108610000	QDPR	530	27522000	102250000	186370000	142300000	75769000	23810000	FALSE	FALSE	FALSE	FALSE	FALSE	FALSE	106842200	23810000	4.487282654	5860	QDPR
A0A140VKC8;Q13630;E9PKL9;E9PLH9;B3KU96;B4DZW9;E9PP14;A0A0J9YX13	TSTA3	11	9	37.7	32	0	49.706	42825000	17187000	35109000	29953000	25455000	44080000	38276000	TSTA3	1150	42825000	17187000	35109000	29953000	25455000	44080000	FALSE	FALSE	FALSE	FALSE	FALSE	FALSE	30105800	44080000	0.682980944	7264	TSTA3
Q9UMB6;A0A140VKD1;Q9Y3Q3	TMED3	3	1	10.5	6	0.0048286	2.7727	4342500	8666100	2108100	2464600	3058100	719350	14635000	TMED3	1837	4342500	8666100	2108100	2464600	3058100	719350	FALSE	FALSE	FALSE	FALSE	FALSE	FALSE	4127880	719350	5.738347119	23423	TMED3
A0A140VKE7;O95757;Q53ZP9;E9PDE8;B4DZR0;B4DXT2;B3KNM0;D6RJ96	HSPA4L	8	19	36.5	36	0	77.561	39012000	6953000	11920000	0	8214100	37933000	11728000	HSPA4L	1982	39012000	6953000	11920000	1867802.576	8214100	37933000	FALSE	FALSE	FALSE	TRUE	FALSE	FALSE	13593380.52	37933000	0.358352372	22824	HSPA4L
B4DPZ3;A0A140VKE9;Q13409-6;Q13409-3;Q13409-7;Q13409-2;Q13409-5;Q13409;Q59GU5;E7EQL5;E7EV09	DYNC1I2	24	12	21.7	37	0	82.428	54426000	48331000	44521000	43605000	45734000	54132000	46217000	DYNC1I2	1027	54426000	48331000	44521000	43605000	45734000	54132000	FALSE	FALSE	FALSE	FALSE	FALSE	FALSE	47323400	54132000	0.874222271	1781	DYNC1I2
A0A140VKF2;O00487;Q53TH1;Q59G89	PSMD14	6	9	39.4	38	0	24.207	26323000	28033000	34539000	35015000	37424000	26667000	33643000	PSMD14	1235	26323000	28033000	34539000	35015000	37424000	26667000	FALSE	FALSE	FALSE	FALSE	FALSE	FALSE	32266800	26667000	1.209989875	10213	PSMD14
A0A140VKG4;Q9NRY5;I6L9D5;B4E1J2;E5RGF9;E7ESJ7;B4DQT0	FAM114A2	13	6	13.9	8	0	15.899	7123800	7036300	3105300	5103000	0	4450300	2811200	FAM114A2	3129	7123800	7036300	3105300	5103000	4936698.258	4450300	FALSE	FALSE	FALSE	FALSE	TRUE	FALSE	5461019.652	4450300	1.227112701	10827	FAM114A2
A0A158RFU3;P20962;O15256;A2VCM6	PTMS	6	4	23.5	24	0	16.505	82116000	0	55796000	30940000	26293000	47155000	3.07E+08	PTMS	209	82116000	1891755.78	55796000	30940000	26293000	47155000	FALSE	TRUE	FALSE	FALSE	FALSE	FALSE	39407351.16	47155000	0.835698254	5763	PTMS
A0A158RFU6;P51149;B4DPH9;C9J8S3;C9J592;C9J4V0;C9IZZ0	RAB7A	9	17	77.3	133	0	323.31	484020000	483820000	419510000	485180000	450370000	242300000	502440000	RAB7A	138	484020000	483820000	419510000	485180000	450370000	242300000	FALSE	FALSE	FALSE	FALSE	FALSE	FALSE	464580000	242300000	1.917375155	7879	RAB7A
F8WF48;A0JLN5;R9WWI7;Q99442;F8WCJ7;Q3KR08;D3DNQ1	SEC62;TLOC1	7	5	56.5	8	0	10.126	16566000	18740000	0	0	0	17136000	35423000	SEC62	1204	16566000	18740000	1949536.306	2474363.562	2018215.485	17136000	FALSE	FALSE	TRUE	TRUE	TRUE	FALSE	8349623.071	17136000	0.487256248	7095	SEC62;TLOC1
B2RAJ6;A0JP11;Q99570;D6RJ98	PIK3R4	6	10	8.5	14	0	20.659	10499000	7027800	5915900	9197900	6096400	5528500	2118400	PIK3R4	3320	10499000	7027800	5915900	9197900	6096400	5528500	FALSE	FALSE	FALSE	FALSE	FALSE	FALSE	7747400	5528500	1.401356607	30849	PIK3R4
A0M8Q2;Q6IPC0;P49593-2;P49593;B5MCT7;B3KX06;Q0VGL7;A8MX49	PPM1F	10	7	25.2	12	0	12.977	9202300	10593000	7952600	8754200	5780000	6322100	7384700	PPM1F	2366	9202300	10593000	7952600	8754200	5780000	6322100	FALSE	FALSE	FALSE	FALSE	FALSE	FALSE	8456420	6322100	1.337596685	9647	PPM1F
A0MNN4;Q2TAY7;Q2TAY7-2	SMU1	3	12	27.9	34	0	232.83	23410000	35980000	32817000	28292000	37284000	38097000	20818000	SMU1	1563	23410000	35980000	32817000	28292000	37284000	38097000	FALSE	FALSE	FALSE	FALSE	FALSE	FALSE	31556600	38097000	0.82832244	55234	SMU1
Q8TCJ8;Q8NCK5;B2RDP6;A0MNN5;Q9BQ67;M0QX71	DKFZp564C172;GRWD1	6	5	19.3	23	0	42.174	20285000	20240000	24831000	28753000	28239000	37899000	31333000	DKFZp564C172	1280	20285000	20240000	24831000	28753000	28239000	37899000	FALSE	FALSE	FALSE	FALSE	FALSE	FALSE	24469600	37899000	0.64565292	83743	DKFZp564C172;GRWD1
A0MNP2;Q96DI7;Q96DI7-2;B2R9I9	WDR57;SNRNP40	5	9	40.3	38	0	38.51	22021000	20838000	23367000	23526000	34420000	22506000	23973000	WDR57	1470	22021000	20838000	23367000	23526000	34420000	22506000	FALSE	FALSE	FALSE	FALSE	FALSE	FALSE	24834400	22506000	1.103456856	9410	SNRNP40;WDR57
A0MZ66;A0MZ66-3;A0MZ66-4;A0MZ66-5;A0MZ66-6;A0MZ66-8;A0MZ66-2	KIAA1598	8	13	22.7	23	0	43.146	40459000	19681000	7140100	4220500	0	0	10572000	KIAA1598	2070	40459000	19681000	7140100	4220500	1588415.482	4217157.287	FALSE	FALSE	FALSE	FALSE	TRUE	TRUE	14617803.1	4217157.287	3.466269361	57698	SHTN1
J3QSV6;A0PJ61;Q32Q62;O76021;A0PJ87;I3L3U9;I3L3C4	RSL1D1	10	15	36.3	59	0	112.53	124590000	88418000	89057000	125250000	128460000	76478000	78141000	RSL1D1	699	124590000	88418000	89057000	125250000	128460000	76478000	FALSE	FALSE	FALSE	FALSE	FALSE	FALSE	111155000	76478000	1.453424514	26156	RSL1D1
H0Y8N7;A0PJ79;Q9BYD6	MRPL1	3	4	26.4	10	0	8.084	6853300	7246500	7598700	0	0	10386000	12980000	MRPL1	1915	6853300	7246500	7598700	1501452.587	2434046.482	10386000	FALSE	FALSE	FALSE	TRUE	TRUE	FALSE	5126799.814	10386000	0.493626017	65008	MRPL1
A0PJK4;B3KTT0;Q8NFH3	NUP43	5	4	19.9	8	0	15.264	3461300	4037400	4313700	4535600	4559400	6974900	7012000	NUP43	2406	3461300	4037400	4313700	4535600	4559400	6974900	FALSE	FALSE	FALSE	FALSE	FALSE	FALSE	4181480	6974900	0.599503936	348995	NUP43
A1L0T0;M0R026;Q59GP4	ILVBL	8	15	35.8	44	0	79.265	39224000	39321000	50184000	54045000	85311000	24606000	27686000	ILVBL	1374	39224000	39321000	50184000	54045000	85311000	24606000	FALSE	FALSE	FALSE	FALSE	FALSE	FALSE	53617000	24606000	2.179021377	10994	ILVBL
A1L3A7;Q7Z417	NUFIP2	2	10	20.6	19	0	21.047	14593000	17490000	13797000	10639000	15409000	8590200	7782000	NUFIP2	2316	14593000	17490000	13797000	10639000	15409000	8590200	FALSE	FALSE	FALSE	FALSE	FALSE	FALSE	14385600	8590200	1.674652511	57532	NUFIP2
A1X283	SH3PXD2B	6	7	9.1	14	0	12.927	10061000	4949700	6377700	7474800	8711400	4832800	2215500	SH3PXD2B	3294	10061000	4949700	6377700	7474800	8711400	4832800	FALSE	FALSE	FALSE	FALSE	FALSE	FALSE	7514920	4832800	1.554982619	285590	SH3PXD2B
Q5TCT4;A2A2V2;P42696-2;P42696	RBM34	4	2	10.4	3	0	5.0404	4209400	0	0	0	2206300	1506900	2879000	RBM34	3115	4209400	776628.316	1954387.627	3098736.996	2206300	1506900	FALSE	TRUE	TRUE	TRUE	FALSE	FALSE	2449090.588	1506900	1.625250904	23029	RBM34
Q96DV6;A2A3R6;P62753;A2A3R5	RPS6	7	9	36.5	59	0	156.48	288730000	217670000	238260000	244650000	263310000	217420000	463650000	RPS6	151	288730000	217670000	238260000	244650000	263310000	217420000	FALSE	FALSE	FALSE	FALSE	FALSE	FALSE	250524000	217420000	1.152258302	6194	RPS6
A2IDC6;Q13084;Q6FHK1;A2IDC7;Q4TT37	MRPL28	5	2	8.8	7	0	5.9104	6575600	4938500	0	0	0	3968800	5954200	MRPL28	2540	6575600	4938500	3574021.844	1408623.304	2436226.391	3968800	FALSE	FALSE	TRUE	TRUE	TRUE	FALSE	3786594.308	3968800	0.954090483	10573	MRPL28
A2RRC9;Q86VI3;F2Z2E2	IQGAP3	3	10	10.2	11	0	17.241	0	12916000	5850100	0	6677300	4406100	1040700	IQGAP3	3756	2127743.02	12916000	5850100	4836134.695	6677300	4406100	TRUE	FALSE	FALSE	TRUE	FALSE	FALSE	6481455.543	4406100	1.471018711	128239	IQGAP3
A2RU94;P51159;Q6IAS8;P51159-2;H3BN55;H3BS49;H3BVH7;H3BUD9	RAB27A	12	10	55.2	33	0	47.65	28184000	53456000	58456000	67387000	46724000	14726000	52465000	RAB27A	931	28184000	53456000	58456000	67387000	46724000	14726000	FALSE	FALSE	FALSE	FALSE	FALSE	FALSE	50841400	14726000	3.452492191	5873	RAB27A
B3KTM6;A2RUM7;P46777;Q59GX9	RPL5	6	13	49.4	138	0	140.3	271240000	281220000	358270000	406390000	374530000	338430000	480950000	RPL5	148	271240000	281220000	358270000	406390000	374530000	338430000	FALSE	FALSE	FALSE	FALSE	FALSE	FALSE	338330000	338430000	0.999704518	6125	RPL5
A6PVJ3;H0Y621;A2TJK5;Q5JWS0;H0Y5K5;Q9Y282;Q9Y282-3;O95330;B4DV36;Q9Y282-2	ERGIC3	14	4	12	11	0	9.1214	7798500	6381500	0	0	6885600	6028600	9458300	ERGIC3	2164	7798500	6381500	2077411.669	1961476.71	6885600	6028600	FALSE	FALSE	TRUE	TRUE	FALSE	FALSE	5020897.676	6028600	0.832846378	51614	ERGIC3
B7Z9S8;A6NGH2;Q6LEU2;A3KLL5;P05026-2;P05026;V9GYR2	ATP1B1	8	3	14.6	5	0	8.7453	0	0	4586900	0	6020900	3915200	5143700	ATP1B1	2681	2085923.797	1178204.399	4586900	4945842.576	6020900	3915200	TRUE	TRUE	FALSE	TRUE	FALSE	FALSE	3763554.155	3915200	0.961267408	481	ATP1B1
A3RJH1;Q92499;F1T0B3;A0A087X2G1;Q92499-3;Q92499-2;B4DP70	DDX1	7	26	41.9	135	0	240.73	119680000	1.48E+08	158870000	133380000	136850000	144450000	65574000	DDX1	799	119680000	1.48E+08	158870000	133380000	136850000	144450000	FALSE	FALSE	FALSE	FALSE	FALSE	FALSE	139356000	144450000	0.964735202	1653	DDX1
A4D0R4;E9PAJ1;Q9UHQ4;C9IYK6;C9JTE9;Q9UHQ4-2;F8WB99;H7C5E2;C9JGJ9;B7Z2L0	BCAP29	14	6	27.1	8	0	15.188	10038000	38016000	4860200	0	10622000	5669100	15951000	BCAP29	1774	10038000	38016000	4860200	2036277.198	10622000	5669100	FALSE	FALSE	FALSE	TRUE	FALSE	FALSE	13114495.44	5669100	2.313329354	55973	BCAP29
B2RDR4;A4D0U5;Q9UGI8-2;Q9UGI8;Q53GU1;E0X098	TES	12	17	48.7	45	0	54.807	45203000	62258000	42252000	63641000	27416000	0	31100000	TES	1284	45203000	62258000	42252000	63641000	27416000	2463741.605	FALSE	FALSE	FALSE	FALSE	FALSE	TRUE	48154000	2463741.605	19.54506914	26136	TES
Q53GE2;Q53GC7;A4D0V4;P47755;F8W9N7;A0A0D9SET8;C9JUG7;B4DE01;P47755-2	CAPZA2	10	12	65.7	39	0	86.159	61941000	76854000	47377000	46476000	34028000	34871000	72601000	CAPZA2	744	61941000	76854000	47377000	46476000	34028000	34871000	FALSE	FALSE	FALSE	FALSE	FALSE	FALSE	53335200	34871000	1.529500158	830	CAPZA2
A4D0W0;O95777;F2Z2Y6;C9JIZ0;C9JNV3	LSM8	5	4	46.9	13	0	16.938	16864000	15972000	24577000	25054000	22530000	20179000	43331000	LSM8	1067	16864000	15972000	24577000	25054000	22530000	20179000	FALSE	FALSE	FALSE	FALSE	FALSE	FALSE	20999400	20179000	1.040656128	51691	LSM8
A4D0Z3;P84085;C9J1Z8;B4DLJ3	ARF5	4	5	64.4	16	0	22.477	12866000	39677000	27732000	22551000	14158000	11032000	28577000	ARF5	1350	12866000	39677000	27732000	22551000	14158000	11032000	FALSE	FALSE	FALSE	FALSE	FALSE	FALSE	23396800	11032000	2.120812183	381	ARF5
A4D105;P35244;B5MC59	RPA3	3	6	67.8	30	0	29.395	21578000	23361000	36939000	37538000	25468000	54321000	77336000	RPA3	705	21578000	23361000	36939000	37538000	25468000	54321000	FALSE	FALSE	FALSE	FALSE	FALSE	FALSE	28976800	54321000	0.533436424	6119	RPA3
A4D177;Q13185	CBX3	5	6	42.6	60	0	134.94	148590000	159610000	90989000	101070000	84639000	114300000	278830000	CBX3	227	148590000	159610000	90989000	101070000	84639000	114300000	FALSE	FALSE	FALSE	FALSE	FALSE	FALSE	116979600	114300000	1.02344357	11335	CBX3
C9J0I9;A4D1L4;Q86WB0-3;Q86WB0-2;Q86WB0	ZC3HC1;NIPA	5	2	4.4	3	0.0031918	2.945	3035600	2496100	3192100	1733400	0	3328200	1471600	ZC3HC1	3579	3035600	2496100	3192100	1733400	1173379.968	3328200	FALSE	FALSE	FALSE	FALSE	TRUE	FALSE	2326115.994	3328200	0.698911121	51530	ZC3HC1;NIPA
H7C4M9;C9JZG9;C9JZY6;A4D1L5;P62256-2;P62256	UBE2H	7	3	64.5	4	0	10.173	6629200	6241100	4954700	6901800	0	13357000	36077000	UBE2H	1190	6629200	6241100	4954700	6901800	3779177.551	13357000	FALSE	FALSE	FALSE	FALSE	TRUE	FALSE	5701195.51	13357000	0.426832036	7328	UBE2H
A4D1N4;C9JRZ6;Q9NX63;F8WAR4	CHCHD3	6	11	42.7	44	0	48.71	107080000	107380000	113870000	81653000	95867000	83187000	137020000	CHCHD3	441	107080000	107380000	113870000	81653000	95867000	83187000	FALSE	FALSE	FALSE	FALSE	FALSE	FALSE	101170000	83187000	1.216175604	54927	CHCHD3
Q567R6;A4D1U3;Q04837;A0A0G2JLD8;E7EUY5;B7Z268;C9K0U8	SSBP1	7	8	56.1	63	0	212.94	112950000	156240000	163610000	173170000	98684000	91744000	213760000	SSBP1	289	112950000	156240000	163610000	173170000	98684000	91744000	FALSE	FALSE	FALSE	FALSE	FALSE	FALSE	140930800	91744000	1.536130973	6742	SSBP1
A4D1U5;Q53H12;E9PC15;B4E2Z8;E9PG39;B4DR72	FLJ10842;AGK	9	14	39.8	48	0	78.892	35885000	40690000	100290000	83010000	62903000	37774000	37641000	FLJ10842	1161	35885000	40690000	100290000	83010000	62903000	37774000	FALSE	FALSE	FALSE	FALSE	FALSE	FALSE	64555600	37774000	1.708995605	55750	AGK;FLJ10842
A4D275;O15143	ARPC1B	13	16	56.7	93	0	188.24	185770000	208550000	158230000	135420000	141260000	173180000	184550000	ARPC1B	330	185770000	208550000	158230000	135420000	141260000	173180000	FALSE	FALSE	FALSE	FALSE	FALSE	FALSE	165846000	173180000	0.957650999	10095	ARPC1B
Q9UES0;A4D2J0;O15498;B5BU81;O15498-2	YKT6	6	10	61.8	47	0	76.829	28143000	30976000	26522000	27243000	31191000	43395000	49527000	YKT6	968	28143000	30976000	26522000	27243000	31191000	43395000	FALSE	FALSE	FALSE	FALSE	FALSE	FALSE	28815000	43395000	0.664016592	10652	YKT6
A4D2P1;A4D2P0;P63000;P63000-2;A4D2P2;A0A024R1P2;P15153;B1AH77;A0A024R9T5;B1AH78;B1AH80;P60763	RAC1;RAC2;hCG_20693;RAC3	14	7	40.6	56	0	43.289	93064000	169700000	140750000	136150000	129020000	144990000	384820000	RAC1	174	93064000	169700000	140750000	136150000	129020000	144990000	FALSE	FALSE	FALSE	FALSE	FALSE	FALSE	133736800	144990000	0.922386371	5879	RAC1;RAC2;RAC3
A4FVC0;Q9UKV8-2;Q9UKV8;A8KA05;Q9H9G7-2;Q9H9G7	EIF2C2;AGO2;EIF2C3;AGO3	14	5	8.9	4	0	14.938	3265100	3349600	0	0	0	7299300	1275000	EIF2C2	3668	3265100	3349600	3991290.606	1605662.384	1491398.932	7299300	FALSE	FALSE	TRUE	TRUE	TRUE	FALSE	2740610.384	7299300	0.375462083	27161	AGO2;AGO3;EIF2C2
A4GYY8;A8K3D0;E7EPK1;Q16181-2;Q16181;G3V1Q4;B4DUD6;Q8TC62;E7ES33;Q3LIE9;Q59EY4	DKFZp686F17268;SEPT7;Nbla02942	15	2	52.7	9	0	185.66	13853000	19327000	0	0	6848700	0	13698000	DKFZp686F17268	1886	13853000	19327000	3078234.798	2452201.519	6848700	1563056.048	FALSE	FALSE	TRUE	TRUE	FALSE	TRUE	9111827.263	1563056.048	5.829494902	989	SEPT7;DKFZp686F17268;Nbla02942
B4DFY5;A4QPA9;Q02750;Q02750-2	MAP2K1	5	4	26.4	15	0	16.303	0	16621000	14050000	17010000	19272000	17501000	33685000	MAP2K1	1234	2311042.656	16621000	14050000	17010000	19272000	17501000	TRUE	FALSE	FALSE	FALSE	FALSE	FALSE	13852808.53	17501000	0.791543828	5604	MAP2K1
A5PKX5;Q16706	MAN2A1	2	5	4.5	7	0	13.871	4260400	4931600	0	0	0	10511000	1596600	MAN2A1	3526	4260400	4931600	4065636.379	2454380.349	2779519.344	10511000	FALSE	FALSE	TRUE	TRUE	TRUE	FALSE	3698307.214	10511000	0.351851129	4124	MAN2A1
B4DXG8;D6RIY6;A5PLM5;Q06265;Q06265-2;Q06265-3;Q06265-4;D6R905	EXOSC9	11	4	11.5	12	0	11.103	5486200	6186900	6862000	6418900	10373000	8373800	8410400	EXOSC9	2255	5486200	6186900	6862000	6418900	10373000	8373800	FALSE	FALSE	FALSE	FALSE	FALSE	FALSE	7065400	8373800	0.843750746	5393	EXOSC9
A5YKK6-2;A5YKK6;A5YKK6-3;B4DYL7;A5YKK6-4	CNOT1	14	13	6	19	0	24.286	12957000	10586000	9990500	10386000	9038800	12407000	2241500	CNOT1	3288	12957000	10586000	9990500	10386000	9038800	12407000	FALSE	FALSE	FALSE	FALSE	FALSE	FALSE	10591660	12407000	0.853684211	23019	CNOT1
L7RXH0;A5YM53;P06756-3;P06756-2;P06756	ITGAV	7	25	29.5	80	0	83.603	53085000	58988000	62541000	79551000	70184000	98698000	19682000	ITGAV	1614	53085000	58988000	62541000	79551000	70184000	98698000	FALSE	FALSE	FALSE	FALSE	FALSE	FALSE	64869800	98698000	0.657255466	3685	ITGAV
A6H8X9;B2RTS4;H0Y2V6;Q5SW79-2;Q5SW79-3;Q5SW79;B4DL23	CEP170	23	13	10.2	27	0	47.943	27194000	31627000	7383600	8850900	9675400	11542000	4072700	CEP170	2866	27194000	31627000	7383600	8850900	9675400	11542000	FALSE	FALSE	FALSE	FALSE	FALSE	FALSE	16946180	11542000	1.46821868	9859	CEP170
H3BTL1;H6UMI0;Q658J6;Q9GZQ8;A6NCE7;Q9H492;Q9H492-2	MAP1LC3B;DKFZp762B153;MAP1LC3B2;MAP1LC3A	7	2	28	15	0	4.2363	6932300	5151000	13311000	11416000	12962000	9225300	35456000	MAP1LC3B	1202	6932300	5151000	13311000	11416000	12962000	9225300	FALSE	FALSE	FALSE	FALSE	FALSE	FALSE	9954460	9225300	1.079039164	81631	MAP1LC3B;DKFZp762B153;MAP1LC3A;MAP1LC3B2
A6NDG6	PGP	2	7	24.9	17	0	21.848	25650000	12087000	7052500	11491000	10823000	7007600	16206000	PGP	1758	25650000	12087000	7052500	11491000	10823000	7007600	FALSE	FALSE	FALSE	FALSE	FALSE	FALSE	13420700	7007600	1.915163537	283871	PGP
A6NEM2;P51610-2;P51610;P51610-4	HCFC1	7	10	6.1	23	0	40.658	15756000	19926000	20100000	22740000	21774000	20141000	5569900	HCFC1	2612	15756000	19926000	20100000	22740000	21774000	20141000	FALSE	FALSE	FALSE	FALSE	FALSE	FALSE	20059200	20141000	0.995938633	3054	HCFC1
A6NFX8;Q9UKK9;A6NCQ0;A6NJU6;H0YEY4	NUDT5	6	10	53.9	59	0	51.662	65999000	49961000	64740000	51520000	60729000	56930000	87300000	NUDT5	628	65999000	49961000	64740000	51520000	60729000	56930000	FALSE	FALSE	FALSE	FALSE	FALSE	FALSE	58589800	56930000	1.029155103	11164	NUDT5
H3BU16;A6NGP5;Q9H910-2;Q9H910;Q9H910-3;H3BMT0;H3BTV5;H3BMV3;B4DL85	HN1L	11	5	40.7	30	0	20.849	18443000	19588000	20165000	25141000	32952000	35899000	39407000	HN1L	1129	18443000	19588000	20165000	25141000	32952000	35899000	FALSE	FALSE	FALSE	FALSE	FALSE	FALSE	23257800	35899000	0.647867629	90861	JPT2
A6NHR9-2;A6NHR9;J3KTL8;A6NHR9-3	SMCHD1	5	8	5	17	0	16.209	5012500	7517900	5455500	5442100	4502200	10664000	1350800	SMCHD1	3634	5012500	7517900	5455500	5442100	4502200	10664000	FALSE	FALSE	FALSE	FALSE	FALSE	FALSE	5586040	10664000	0.523822206	23347	SMCHD1
A6NKZ2;P51606;P51606-2	RENBP	6	12	28.1	27	0	39.751	37294000	27218000	22082000	23612000	16300000	0	37677000	RENBP	1160	37294000	27218000	22082000	23612000	16300000	1318334.53	FALSE	FALSE	FALSE	FALSE	FALSE	TRUE	25301200	1318334.53	19.19179042	5973	RENBP
A6NMQ3;Q5T5H1;O43768-2;O43768;O43768-9;O43768-3;O43768-4;O43768-6;O43768-5;O43768-7	ENSA	17	5	40.7	19	0	18.369	34363000	7765100	0	10878000	0	9029300	36272000	ENSA	1186	34363000	7765100	1610299.794	10878000	2975395.582	9029300	FALSE	FALSE	TRUE	FALSE	TRUE	FALSE	11518359.08	9029300	1.275664678	2029	ENSA
B4DPP0;A6NNI4;G8JLH6;P21926	CD9	9	3	29.8	9	0	13.781	0	14167000	14105000	0	13261000	20962000	26245000	CD9	1416	1564720.938	14167000	14105000	1188958.629	13261000	20962000	TRUE	FALSE	FALSE	TRUE	FALSE	FALSE	8857335.913	20962000	0.422542501	928	CD9
A6NNK5;Q12888;Q12888-3;Q12888-2;B7Z3E7;A8KA50;C9JXV0	TP53BP1	10	11	7.9	23	0	24.728	8814200	7241700	12866000	14396000	13794000	17555000	2173700	TP53BP1	3303	8814200	7241700	12866000	14396000	13794000	17555000	FALSE	FALSE	FALSE	FALSE	FALSE	FALSE	11422380	17555000	0.650662489	7158	TP53BP1
A6PVN5;Q15257-3;Q15257-2;Q15257;F6WIT2;B4DZF8;A6PVN9;Q5T949;Q5T948;Q15257-4;A6PVN6;B4DLX5	PPP2R4	21	9	37.4	26	0	51.224	19808000	21101000	42079000	36278000	29965000	53336000	32652000	PPP2R4	1257	19808000	21101000	42079000	36278000	29965000	53336000	FALSE	FALSE	FALSE	FALSE	FALSE	FALSE	29846200	53336000	0.559588271	5524	PTPA
A7BI36;A0A0A0MRV0;Q9P2E9-2;Q9P2E9;Q9P2E9-3;A0A087WVV2;F8W7S5	RRBP1	12	8	44.9	28	0	323.31	18202000	42852000	21644000	19088000	20684000	36293000	4640100	A7BI36	2760	18202000	42852000	21644000	19088000	20684000	36293000	FALSE	FALSE	FALSE	FALSE	FALSE	FALSE	24494000	36293000	0.674895985	6238	RRBP1
A7E2Y5;O75165;B3KN02	DNAJC13	6	25	13.5	56	0	55.511	30984000	24873000	35285000	34396000	25198000	37294000	4592900	DNAJC13	2765	30984000	24873000	35285000	34396000	25198000	37294000	FALSE	FALSE	FALSE	FALSE	FALSE	FALSE	30147200	37294000	0.808365957	23317	DNAJC13
A7MD03;Q96JG6-3;Q96JG6;Q9NXR2;Q75N11;H0Y7Q2;Q5JPD9;B4DS55;D6W5Q7;Q96JG6-2	CCDC132;FLJ20097;DKFZp313I2429	11	4	4.9	3	0	5.3466	3179000	2419700	3087300	3019500	0	1814100	784440	CCDC132	3888	3179000	2419700	3087300	3019500	2554245.677	1814100	FALSE	FALSE	FALSE	FALSE	TRUE	FALSE	2851949.135	1814100	1.572101392	55610	CCDC132;DKFZp313I2429;FLJ20097;VPS50
A7VJC9;Q15642-2;Q15642;M0R0F9;W4VSQ9;Q15642-4;Q15642-3	STP;TRIP10	9	4	7.7	7	0	9.659	4012200	4824500	6022600	5011000	0	18754000	4335500	STP	2821	4012200	4824500	6022600	5011000	2288450.384	18754000	FALSE	FALSE	FALSE	FALSE	TRUE	FALSE	4431750.077	18754000	0.236309591	9322	TRIP10
B1PL87;A8ASI8;B3KT21;P55957;P55957-2;B2ZP79;P55957-4	BID	7	4	36	22	0	68.053	21532000	20901000	10144000	16798000	11896000	16796000	37223000	BID	1169	21532000	20901000	10144000	16798000	11896000	16796000	FALSE	FALSE	FALSE	FALSE	FALSE	FALSE	16254200	16796000	0.96774232	637	BID
A8CDT9;F8WE88;Q9Y4I1-2;Q9Y4I1;A0A087WY00;G3V394;F8W6H6;Q9Y4I1-3;Q59FF5	MYO5A	27	30	21	50	0	120.91	10611000	29716000	46553000	58129000	29905000	7897300	5470800	MYO5A	2632	10611000	29716000	46553000	58129000	29905000	7897300	FALSE	FALSE	FALSE	FALSE	FALSE	FALSE	34982800	7897300	4.429716485	4644	MYO5A
A8DPD7;B4DK95;B3KTI5;Q9C0D3	ZYG11B	4	2	3.2	6	0	4.5054	897940	0	2518000	3985800	0	0	1881600	ZYG11B	3406	897940	2382436.95	2518000	3985800	2620246.042	1134484.78	FALSE	TRUE	FALSE	FALSE	TRUE	TRUE	2480884.598	1134484.78	2.186794077	79699	ZYG11B
G3XAN4;Q6FHL3;A8K032;Q15629-2;Q15629;Q6FHU7	TRAM1	6	5	18.1	28	0	18.506	21907000	35165000	10347000	12985000	13634000	102870000	59221000	TRAM1	857	21907000	35165000	10347000	12985000	13634000	102870000	FALSE	FALSE	FALSE	FALSE	FALSE	FALSE	18807600	102870000	0.182828813	23471	TRAM1
Q53H01;A8K0B6;D3DSQ1;B3KUZ6;Q13510;Q13510-2;E7EMM4;Q13510-3;B1B5S8	ASAH1	20	11	32.7	38	0	99.111	118070000	120810000	92784000	83150000	82580000	15061000	82745000	ASAH1	664	118070000	120810000	92784000	83150000	82580000	15061000	FALSE	FALSE	FALSE	FALSE	FALSE	FALSE	99478800	15061000	6.605059425	427	ASAH1
A8K0F7;Q8N0U8	VKORC1L1	3	3	17	6	0	7.1566	8046600	8795100	0	6489900	6461900	8210400	18849000	VKORC1L1	1654	8046600	8795100	2344924.056	6489900	6461900	8210400	FALSE	FALSE	TRUE	FALSE	FALSE	FALSE	6427684.811	8210400	0.782871092	154807	VKORC1L1
F5H5N1;B7Z1U1;A8K0V6;Q8NAS7;Q7LD69;F5GXJ1;O75251-2;O75251;B7Z4P1;Q6ZQU6;Q9H3K5;A0A087WXF6;A0A087WTI3	NDUFS7	14	3	17.6	10	0	9.3521	8776500	9918200	9635900	9984900	0	7858300	17294000	NDUFS7	1708	8776500	9918200	9635900	9984900	1524235.666	7858300	FALSE	FALSE	FALSE	FALSE	TRUE	FALSE	7967947.133	7858300	1.013953035	374291	NDUFS7
Q7Z3Z9;A8K139;P32004-3;P32004-2;P32004	L1CAM	13	11	10.4	19	0	31.68	0	32835000	32264000	14794000	16228000	4488000	3571000	L1CAM	2960	1965392.765	32835000	32264000	14794000	16228000	4488000	TRUE	FALSE	FALSE	FALSE	FALSE	FALSE	19617278.55	4488000	4.371051371	3897	L1CAM
J3QQW9;A8K1U9;Q15022	SUZ12	3	2	3.1	5	0	4.5495	2794600	1838900	0	0	3118200	1991600	907530	SUZ12	3832	2794600	1838900	1605084.586	3794169.621	3118200	1991600	FALSE	FALSE	TRUE	TRUE	FALSE	FALSE	2630190.841	1991600	1.320642118	23512	SUZ12
A8K201;Q9Y3B9	RRP15	3	5	18.9	13	0	9.5742	6021000	4694100	6206000	6731800	0	4396200	6609400	RRP15	2451	6021000	4694100	6206000	6731800	1707566.414	4396200	FALSE	FALSE	FALSE	FALSE	TRUE	FALSE	5072093.283	4396200	1.153744889	51018	RRP15
A8K245;Q99986;H0YJ50	VRK1	4	5	15.2	8	0	33.21	6703900	14153000	7351700	9931700	0	7460000	7485800	VRK1	2352	6703900	14153000	7351700	9931700	1495125.903	7460000	FALSE	FALSE	FALSE	FALSE	TRUE	FALSE	7927085.181	7460000	1.062611955	7443	VRK1
A8K287;O00161;H3BM38;A0A024R9R8;O00161-2;H3BNE1;H3BR18;H3BPJ0;H3BV99;H3BP15;H3BQY9	SNAP23	14	6	38.4	15	0	17.604	11282000	17539000	15184000	15567000	10718000	9313600	18917000	SNAP23	1651	11282000	17539000	15184000	15567000	10718000	9313600	FALSE	FALSE	FALSE	FALSE	FALSE	FALSE	14058000	9313600	1.5094056	8773	SNAP23
A8K2M0;P43686;P43686-2	PSMC4	3	20	61.7	90	0	118.21	113340000	98877000	122940000	127790000	141510000	119400000	92790000	PSMC4	600	113340000	98877000	122940000	127790000	141510000	119400000	FALSE	FALSE	FALSE	FALSE	FALSE	FALSE	120891400	119400000	1.012490787	5704	PSMC4
A8K2R3;O60341;O60341-2;R4GMP9	KDM1A	4	5	11.1	13	0	25.038	0	4274000	8360800	8641800	6323800	5960700	2051900	KDM1A	3353	2753131.494	4274000	8360800	8641800	6323800	5960700	TRUE	FALSE	FALSE	FALSE	FALSE	FALSE	6070706.299	5960700	1.018455265	23028	KDM1A
A8K2S1;P47712;B4DZI4	PLA2G4A	4	4	6.3	6	0	4.6552	5268400	0	4938200	6101400	5423700	0	1220700	PLA2G4A	3694	5268400	2029184.042	4938200	6101400	5423700	1187101.896	FALSE	TRUE	FALSE	FALSE	FALSE	TRUE	4752176.808	1187101.896	4.00317515	5321	PLA2G4A
Q2TTR7;A9CB80;A8K2T7;P00533;E7BSV0;B7Z2I3;E9PFD7;F2YGG7;Q504U8;A0A0B4J1Y5;Q59FL8;P00533-4;P00533-3;Q68GS6	EGFR	47	17	19.1	21	0	59.231	2460200	0	0	3156800	2967200	6276400	3869000	EGFR	2907	2460200	1355493.402	3012784.312	3156800	2967200	6276400	FALSE	TRUE	TRUE	FALSE	FALSE	FALSE	2590495.543	6276400	0.41273589	1956	EGFR
E9PB90;A8K2U2;P52789;Q68E10;Q53QX9	HK2;DKFZp686M1669	11	19	33.4	52	0	74.457	42497000	42045000	49977000	52312000	56476000	27765000	14221000	HK2	1857	42497000	42045000	49977000	52312000	56476000	27765000	FALSE	FALSE	FALSE	FALSE	FALSE	FALSE	48661400	27765000	1.752616604	3099	HK2
B4DN59;A8K309;P16070-12;P16070-14;P16070-13;P16070-8;H0YD13;P16070-18;P16070-11;P16070-10;P16070-16;P16070-17;P16070-6;P16070-4;P16070-3;P16070-7;P16070-5;P16070;H0Y2P0;H0YE40;B4E2X0;H0Y5E4;P16070-15	CD44	35	10	41.3	73	0	82.086	164840000	264810000	243700000	211350000	239170000	305110000	319170000	CD44	199	164840000	264810000	243700000	211350000	239170000	305110000	FALSE	FALSE	FALSE	FALSE	FALSE	FALSE	224774000	305110000	0.73669824	960	CD44
A8K321;B4DZ55;Q6ZXV5-2;Q6ZXV5	TMTC3	5	5	7.8	7	0	10.102	0	1648300	0	0	2463100	5453700	714350	TMTC3	3928	3322453.009	1648300	2458912.44	1508342.423	2463100	5453700	TRUE	FALSE	TRUE	TRUE	FALSE	FALSE	2280221.574	5453700	0.418105428	160418	TMTC3
B7ZLP5;A8K329;Q15424;Q15424-4;Q15424-3;B7Z2Z1;Q15424-2;B7Z5X3;B7Z1C7;B7Z2F6;B7Z959	SAFB	14	10	25.3	19	0	53.176	33563000	26863000	32518000	27730000	27781000	19647000	14612000	SAFB	1839	33563000	26863000	32518000	27730000	27781000	19647000	FALSE	FALSE	FALSE	FALSE	FALSE	FALSE	29691000	19647000	1.511223087	6294	SAFB
A8K330;Q8IWA0	WDR75	2	4	5.3	6	0	7.4203	2643800	2871000	3047800	4070800	4725200	2678800	1246100	WDR75	3680	2643800	2871000	3047800	4070800	4725200	2678800	FALSE	FALSE	FALSE	FALSE	FALSE	FALSE	3471720	2678800	1.295998208	84128	WDR75
A8K335;Q92820;B4DVI2	GGH	3	11	36.8	49	0	79.765	140820000	71586000	75074000	43535000	82842000	151230000	118080000	GGH	488	140820000	71586000	75074000	43535000	82842000	151230000	FALSE	FALSE	FALSE	FALSE	FALSE	FALSE	82771400	151230000	0.547321299	8836	GGH
B2R6E5;A8K3B4;Q59ED7;P16435;Q63HL4;H0Y4R2;B4DJI8;E7EMD0;B4DDH3;B4DKM8;B4E305	POR;DKFZp686G04235	12	13	22.9	56	0	67.505	38334000	58168000	33140000	50798000	31308000	19582000	20143000	POR	1594	38334000	58168000	33140000	50798000	31308000	19582000	FALSE	FALSE	FALSE	FALSE	FALSE	FALSE	42349600	19582000	2.162680012	5447	POR
Q53EL3;B5BU52;B2R6Q4;A8K3B6;P41240;B4DP99;B4DMZ0	CSK	20	8	20.9	24	0	17.776	8065800	10795000	15062000	15420000	17245000	7344400	6869300	CSK	2426	8065800	10795000	15062000	15420000	17245000	7344400	FALSE	FALSE	FALSE	FALSE	FALSE	FALSE	13317560	7344400	1.813294483	1445	CSK
A8K3C5;J3KPP4;O95232;Q86Y74;Q6PKC2;B4DJ96	LUC7L3;CROP	16	11	30.3	30	0	116.72	40839000	29125000	22488000	16714000	24446000	20684000	27555000	LUC7L3	1377	40839000	29125000	22488000	16714000	24446000	20684000	FALSE	FALSE	FALSE	FALSE	FALSE	FALSE	26722400	20684000	1.291935796	51747	CROP;LUC7L3
D3DVA3;B4DF47;A8K3J5;Q9BUK6-7;Q9BUK6-3;Q9BUK6-2;Q9BUK6;B4DHK3;B4DLS9;Q9BUK6-4	MSTO1	15	4	12	6	0	6.5209	2730200	2867200	0	1840600	0	0	2517400	MSTO1	3213	2730200	2867200	2071755.33	1840600	4733585.441	949181.7722	FALSE	FALSE	TRUE	FALSE	TRUE	TRUE	2848668.154	949181.7722	3.001182953	55154	MSTO1
B3KSW0;Q53HA5;A8K3L7;B3KY94;O14735-3;O14735	CDIPT	8	4	25.4	16	0	47.056	11395000	14235000	16619000	20329000	13592000	17097000	36998000	CDIPT	1172	11395000	14235000	16619000	20329000	13592000	17097000	FALSE	FALSE	FALSE	FALSE	FALSE	FALSE	15234000	17097000	0.891033515	10423	CDIPT
A8K3M3;P18031;B4DSN5	PTPN1	3	18	49.7	75	0	114	94158000	79361000	71655000	43079000	50161000	90456000	49453000	PTPN1	970	94158000	79361000	71655000	43079000	50161000	90456000	FALSE	FALSE	FALSE	FALSE	FALSE	FALSE	67682800	90456000	0.748240028	5770	PTPN1
Q6LES9;A8K3S0;P40937;Q59GW7;P40937-2;A8K4Z2	RFC5	11	10	35.9	25	0	22.937	17607000	14976000	15303000	21636000	30778000	29200000	13990000	RFC5	1868	17607000	14976000	15303000	21636000	30778000	29200000	FALSE	FALSE	FALSE	FALSE	FALSE	FALSE	20060000	29200000	0.686986301	5985	RFC5
A8K3X2;Q15633-2;Q15633;A0A024RB49	TARBP2	13	5	16.9	6	0	9.1784	3181600	0	4190400	7559800	4942500	0	4506200	TARBP2	2780	3181600	1938970.241	4190400	7559800	4942500	3219318.509	FALSE	TRUE	FALSE	FALSE	FALSE	TRUE	4362654.048	3219318.509	1.355148314	6895	TARBP2
A8K3Y5;Q9NX58	LYAR	3	5	15.8	10	0	25.381	7912600	11421000	8449200	16366000	7272200	12226000	9827200	LYAR	2135	7912600	11421000	8449200	16366000	7272200	12226000	FALSE	FALSE	FALSE	FALSE	FALSE	FALSE	10284200	12226000	0.841174546	55646	LYAR
A8K3Z5;Q8NFH5-2;Q8NFH5;C9IYQ7;F8WCF5;F8WEL4;A8K0N6;Q8NFH5-3	NUP35	9	4	19.3	12	0	12.644	4107700	3568900	5058000	7420700	6699400	6082300	5958500	NUP35	2538	4107700	3568900	5058000	7420700	6699400	6082300	FALSE	FALSE	FALSE	FALSE	FALSE	FALSE	5370940	6082300	0.883044243	129401	NUP35
V9HWF5;A8K486;P62937;B2RE56;B4DM82;Q71V99;F8WE65;C9J5S7	HEL-S-69p;PPIA	18	6	75.8	40	0	323.31	522200000	372970000	1064200000	482500000	532970000	1017200000	1378100000	HEL-S-69p	26.5	522200000	372970000	1064200000	482500000	532970000	1017200000	FALSE	FALSE	FALSE	FALSE	FALSE	FALSE	594968000	1017200000	0.584907589	5478	HEL-S-69p;PPIA
A8K489;Q15007;Q9BZS4;A0A087X1R4;Q6AHX7;Q15007-2	WTAP;DKFZp686F20131	6	2	7.3	5	0	7.2126	2060700	0	2846500	2762400	3602100	2646000	1550100	WTAP	3550	2060700	1431486.731	2846500	2762400	3602100	2646000	FALSE	TRUE	FALSE	FALSE	FALSE	FALSE	2540637.346	2646000	0.960180403	9589	WTAP
A8K492;P56192;B4DF61;P56192-2;B4E0E9	MARS	19	26	39.7	110	0	248.59	118590000	73242000	87729000	94301000	89057000	126190000	51251000	MARS	948	118590000	73242000	87729000	94301000	89057000	126190000	FALSE	FALSE	FALSE	FALSE	FALSE	FALSE	92583800	126190000	0.733685712	4141	MARS
Q6NZ55;A8K4C8;P26373;P26373-2	RPL13	10	11	43.1	65	0	210.64	530210000	552840000	116560000	90368000	63711000	111610000	646610000	RPL13	108	530210000	552840000	116560000	90368000	63711000	111610000	FALSE	FALSE	FALSE	FALSE	FALSE	FALSE	270737800	111610000	2.425748589	6137	RPL13
Q59H57;B4DR70;A8K4H1;Q8TBR3;Q6IBQ5;Q13344;P35637-2;P35637;H3BPE7;Q70T18	FUS	10	7	38.3	54	0	56.959	170220000	135920000	135420000	127500000	144930000	101500000	185410000	FUS	328	170220000	135920000	135420000	127500000	144930000	101500000	FALSE	FALSE	FALSE	FALSE	FALSE	FALSE	142798000	101500000	1.406876847	2521	FUS
Q53H22;A8K4H7;Q06203	PPAT	6	10	23.4	32	0	32.899	31781000	27210000	25006000	26855000	25175000	35463000	22910000	PPAT	1498	31781000	27210000	25006000	26855000	25175000	35463000	FALSE	FALSE	FALSE	FALSE	FALSE	FALSE	27205400	35463000	0.767148859	5471	PPAT
Q6IBT5;Q5JQI0;A8K4K1;Q99519;E9PIF4;Q6Q4G9	NEU1	9	4	9.9	12	0	9.3992	10797000	6831100	5619700	5745700	0	5922500	6087000	NEU1	2519	10797000	6831100	5619700	5745700	4569872.665	5922500	FALSE	FALSE	FALSE	FALSE	TRUE	FALSE	6712674.533	5922500	1.133419085	4758	NEU1
Q53HG5;A8K4K9;Q15006	EMC2	5	6	26.3	20	0	22.089	9138600	11869000	10431000	10865000	12821000	12075000	13500000	EMC2	1894	9138600	11869000	10431000	10865000	12821000	12075000	FALSE	FALSE	FALSE	FALSE	FALSE	FALSE	11024920	12075000	0.913036853	9694	EMC2
A8K4M4;Q96G23;Q5SZE1;H0YNU7;H0YLQ6	CERS2	9	5	18.2	15	0	26.686	22332000	44258000	21600000	22826000	27519000	17777000	32610000	CERS2	1258	22332000	44258000	21600000	22826000	27519000	17777000	FALSE	FALSE	FALSE	FALSE	FALSE	FALSE	27707000	17777000	1.558586938	29956	CERS2
Q9BQD2;B2R680;A8K4S9;P42226;B7ZAC1;P42226-2;P42226-3;G3V2X7;H0YJH6;B4DR42;B4DQB3	STAT6	20	4	7.4	6	0	8.9231	5366100	4415000	4349200	0	4542400	4839200	2033900	STAT6	3358	5366100	4415000	4349200	2797319.738	4542400	4839200	FALSE	FALSE	FALSE	TRUE	FALSE	FALSE	4294003.948	4839200	0.887337566	6778	STAT6
A8K4T6;Q16401-2;Q16401	PSMD5	5	13	32.7	35	0	98.001	41751000	24201000	40340000	45645000	31557000	46632000	23530000	PSMD5	1484	41751000	24201000	40340000	45645000	31557000	46632000	FALSE	FALSE	FALSE	FALSE	FALSE	FALSE	36698800	46632000	0.786987476	5711	PSMD5
B4DRG7;E9PHA2;A8K4T8;Q15003;Q15003-2;C9J470	NCAPH	8	8	14.5	13	0	21.925	13488000	11810000	13981000	15054000	19675000	13437000	7398300	NCAPH	2364	13488000	11810000	13981000	15054000	19675000	13437000	FALSE	FALSE	FALSE	FALSE	FALSE	FALSE	14801600	13437000	1.101555407	23397	NCAPH
Q6NXR8;A8K4W0;P61247;D6RG13;B7Z3M5;E9PFI5;H0Y9Y4;D6RAT0;H0Y8L7;D6RB09;D6R9B6;D6RAS7	RPS3A	16	16	56.4	159	0	323.01	637110000	656110000	749970000	832680000	818830000	588390000	697740000	RPS3A	90	637110000	656110000	749970000	832680000	818830000	588390000	FALSE	FALSE	FALSE	FALSE	FALSE	FALSE	738940000	588390000	1.255867707	6189	RPS3A
Q08ET0;A8K4W2;P24539;Q5QNZ2;Q53GB3	hCG_39985;ATP5F1	5	10	45.7	50	0	117.89	156780000	1.86E+08	121680000	75354000	124470000	172530000	189180000	hCG_39985	323	156780000	1.86E+08	121680000	75354000	124470000	172530000	FALSE	FALSE	FALSE	FALSE	FALSE	FALSE	132856800	172530000	0.770050426	515	ATP5F1
Q6IAL5;A8K4W7;P53597;B2R8A1;B7Z438	SUCLG1	6	6	27.3	19	0	13.464	35128000	41972000	43542000	37129000	32106000	30137000	54860000	SUCLG1	904	35128000	41972000	43542000	37129000	32106000	30137000	FALSE	FALSE	FALSE	FALSE	FALSE	FALSE	37975400	30137000	1.260092245	8802	SUCLG1
H3BQQ9;A8K503;Q7KZS0;B0QYN7;P63279;H3BPC4	UBE2I	7	8	45.3	31	0	108.55	52801000	56910000	37689000	58184000	50666000	53714000	110150000	UBE2I	525	52801000	56910000	37689000	58184000	50666000	53714000	FALSE	FALSE	FALSE	FALSE	FALSE	FALSE	51250000	53714000	0.954127416	7329	UBE2I
A8K517;P62266;D6RD47;D6RDJ2;D6RIX0;D6R9I7	RPS23	6	6	30.1	57	0	23.711	221690000	181770000	180040000	179950000	161960000	154780000	498500000	RPS23	142	221690000	181770000	180040000	179950000	161960000	154780000	FALSE	FALSE	FALSE	FALSE	FALSE	FALSE	185082000	154780000	1.195774648	6228	RPS23
A8K548;C9JFV4;B4DR36;Q8IZL8;E7EV54;B4DEX7;O15451;I3L445	PELP1	11	14	17	27	0	35.954	15193000	12770000	34240000	34511000	22082000	21318000	7991300	PELP1	2293	15193000	12770000	34240000	34511000	22082000	21318000	FALSE	FALSE	FALSE	FALSE	FALSE	FALSE	23759200	21318000	1.114513557	27043	PELP1
Q59GY3;A8K588;Q13247-3;Q13247;V9HVZ0	SRSF6;HEL-S-91	8	8	39.8	35	0	56.692	86082000	68947000	40265000	44990000	34286000	40547000	68176000	SRSF6	781	86082000	68947000	40265000	44990000	34286000	40547000	FALSE	FALSE	FALSE	FALSE	FALSE	FALSE	54914000	40547000	1.354329543	6431	SRSF6
A8K594;Q9P0V3;Q9P0V3-2	SH3BP4	4	10	12.1	12	0	14.518	16397000	15749000	16907000	14377000	22587000	24244000	4883800	SH3BP4	2720	16397000	15749000	16907000	14377000	22587000	24244000	FALSE	FALSE	FALSE	FALSE	FALSE	FALSE	17203400	24244000	0.709594126	23677	SH3BP4
B4DTA9;A8K5C2;D3DUL8;Q6P9B6	KIAA1609;TLDC1	7	5	19.8	15	0	22.126	4000600	8510700	6185800	6034600	7507500	30031000	9114400	KIAA1609	2190	4000600	8510700	6185800	6034600	7507500	30031000	FALSE	FALSE	FALSE	FALSE	FALSE	FALSE	6447840	30031000	0.214706137	57707	TLDC1
Q9UEL4;Q5U0H8;A8K5D4;O95297-2;O95297;O95297-4	MPZL1	10	3	14	6	0	5.0675	5174800	0	0	0	4247700	5357400	5382200	MPZL1	2649	5174800	2265001.375	4346452.364	2992841.569	4247700	5357400	FALSE	TRUE	TRUE	TRUE	FALSE	FALSE	3805359.062	5357400	0.710299597	9019	MPZL1
A8K5D5;P49406;B4DIG4;S4R3W9;A0A0A0MRF4	MRPL19	6	6	20.7	14	0	11.227	13560000	11683000	9763900	9783000	0	7823300	9001300	MRPL19	2198	13560000	11683000	9763900	9783000	2694087.618	7823300	FALSE	FALSE	FALSE	FALSE	TRUE	FALSE	9496797.524	7823300	1.213911971	9801	MRPL19
A8K5H7;Q96TA2-3;Q96TA2-2;Q96TA2;Q9Y2Q2;Q9NQ51;Q96I63;R4GNA5	YME1L1;FTSH	10	6	10.2	10	0	30.989	6661800	6420300	0	5025300	0	5233000	2374700	YME1L1	3256	6661800	6420300	2576195.355	5025300	1420831.434	5233000	FALSE	FALSE	TRUE	FALSE	TRUE	FALSE	4420885.358	5233000	0.844808973	10730	YME1L1;FTSH
A8K5J1;P11172;B5LY71;B5LY69;P11172-3;E9PFD2;B5LY64;B5LY67;P11172-2;B5LY70	UMPS	14	12	29.6	35	0	30.798	39541000	31716000	33465000	33378000	28424000	40537000	24464000	UMPS	1456	39541000	31716000	33465000	33378000	28424000	40537000	FALSE	FALSE	FALSE	FALSE	FALSE	FALSE	33304800	40537000	0.821590152	7372	UMPS
A8K5S3;P53990-2;P53990;P53990-4;H3BMU1;H3BUI0;P53990-3;P53990-5;H3BQF7;J3KR23;B4DLP1;B4DM80	IST1	20	7	21.4	24	0	57.701	14803000	23409000	22767000	29013000	25335000	18795000	36438000	IST1	1181	14803000	23409000	22767000	29013000	25335000	18795000	FALSE	FALSE	FALSE	FALSE	FALSE	FALSE	23065400	18795000	1.227209364	9798	IST1
A8K5T7;Q9Y2Z0;Q9Y2Z0-2;A8K7W3;B4DYC6	SUGT1	6	17	55.1	67	0	122.95	31609000	84983000	44572000	64990000	73857000	48708000	47248000	SUGT1	1000	31609000	84983000	44572000	64990000	73857000	48708000	FALSE	FALSE	FALSE	FALSE	FALSE	FALSE	60002200	48708000	1.231875667	10910	SUGT1
A8K5W7;Q9NSE4	IARS2	2	21	26.9	74	0	87.498	78691000	25758000	80692000	52627000	64761000	46960000	30568000	IARS2	1291	78691000	25758000	80692000	52627000	64761000	46960000	FALSE	FALSE	FALSE	FALSE	FALSE	FALSE	60505800	46960000	1.288454003	55699	IARS2
A8K5Y7;Q9HAV4;B3KPQ5;B3KNC6;Q9H8N6	XPO5	10	24	23.8	68	0	175.29	60523000	37671000	67356000	54742000	57607000	27978000	11607000	XPO5	1995	60523000	37671000	67356000	54742000	57607000	27978000	FALSE	FALSE	FALSE	FALSE	FALSE	FALSE	55579800	27978000	1.986553721	57510	XPO5
A8K607;Q9UIA9;E7ESC6;B4DSP8;D3DSQ7	XPO7	7	17	19.1	29	0	61.429	27470000	19421000	16571000	20167000	20938000	17623000	6948400	XPO7	2412	27470000	19421000	16571000	20167000	20938000	17623000	FALSE	FALSE	FALSE	FALSE	FALSE	FALSE	20913400	17623000	1.186710549	23039	XPO7
A8K622;Q59F99;O95793-2;O95793;A0A087X1A5;Q5JW30;O95793-3;B3KRE0	STAU1	12	13	28.1	56	0	69.649	31129000	45165000	30699000	31436000	45639000	46231000	22085000	STAU1	1523	31129000	45165000	30699000	31436000	45639000	46231000	FALSE	FALSE	FALSE	FALSE	FALSE	FALSE	36813600	46231000	0.796296857	6780	STAU1
A8K644;Q08170;A0A0D9SEM4;Q53F45;Q59EF5	SFRS4;SRSF4	6	6	23.3	8	0	29.103	19520000	42441000	16086000	0	0	5695700	26981000	SFRS4	1388	19520000	42441000	16086000	2572318.58	2403925.279	5695700	FALSE	FALSE	FALSE	TRUE	TRUE	FALSE	16604648.77	5695700	2.915295534	6429	SRSF4;SFRS4
A8K646;Q92882	OSTF1	2	6	43	22	0	24.398	12107000	19116000	19833000	20091000	16337000	17760000	23503000	OSTF1	1485	12107000	19116000	19833000	20091000	16337000	17760000	FALSE	FALSE	FALSE	FALSE	FALSE	FALSE	17496800	17760000	0.98518018	26578	OSTF1
A8K651;Q07021;I3L3Q7;I3L3B0	C1QBP	4	8	51.4	81	0	242.57	153490000	86616000	351900000	266640000	250230000	122960000	204620000	C1QBP	299	153490000	86616000	351900000	266640000	250230000	122960000	FALSE	FALSE	FALSE	FALSE	FALSE	FALSE	221775200	122960000	1.803636955	708	C1QBP
V9HW72;A8K690;P31948;P31948-2;P31948-3	HEL-S-94n;STIP1	8	41	64.1	198	0	223.22	779840000	477820000	421640000	541250000	536530000	338640000	320600000	HEL-S-94n	194	779840000	477820000	421640000	541250000	536530000	338640000	FALSE	FALSE	FALSE	FALSE	FALSE	FALSE	551416000	338640000	1.628325065	10963	HEL-S-94n;STIP1
A8K6D2;Q92979;B4DQC7;A0A087WVM7;V9GYP5;A0A087WWQ2	EMG1	8	8	41.4	19	0	21.222	10079000	14148000	12202000	14707000	15153000	15219000	16139000	EMG1	1762	10079000	14148000	12202000	14707000	15153000	15219000	FALSE	FALSE	FALSE	FALSE	FALSE	FALSE	13257800	15219000	0.871134766	10436	EMG1
B4DM30;B4DET0;A8K6G9;Q92620;B4DN69;Q92620-2	DHX38	7	4	5.8	8	0	7.5328	2981600	0	2809700	2732600	0	2748700	1040500	DHX38	3757	2981600	1098454.298	2809700	2732600	4597037.556	2748700	FALSE	TRUE	FALSE	FALSE	TRUE	FALSE	2843878.371	2748700	1.034626686	9785	DHX38
A8K6K2;P49902;P49902-2;Q5JUV4;B3KXN5	NT5C2	10	5	12.1	9	0	8.9924	0	5439900	5045000	5214100	0	14397000	4392200	NT5C2	2805	2200824.939	5439900	5045000	5214100	1964396.411	14397000	TRUE	FALSE	FALSE	FALSE	TRUE	FALSE	3972844.27	14397000	0.275949453	22978	NT5C2
Q53ER0;A8K6K7;P13807-2;P13807;B7Z806;B7Z6I6	GYS1	10	5	9.6	10	0	13.763	16875000	9344900	10419000	8902500	8480000	6136000	6318000	GYS1	2487	16875000	9344900	10419000	8902500	8480000	6136000	FALSE	FALSE	FALSE	FALSE	FALSE	FALSE	10804280	6136000	1.760801825	2997	GYS1
D6RHI7;D6RG18;Q59FW7;A8K6Q5;P51946	CCNH	5	2	10.8	4	0.0005237	3.7268	0	0	0	2658700	2952200	2288500	1709300	CCNH	3480	1966589.914	2389906.29	3573347.067	2658700	2952200	2288500	TRUE	TRUE	TRUE	FALSE	FALSE	FALSE	2708148.654	2288500	1.183372801	902	CCNH
Q9UEH5;Q6IPW4;Q6IB76;A8K750;E7EPT4;P19404	NDUFV2	6	2	10	13	0	16.306	0	9403000	8372400	9340300	5796500	6093100	12552000	NDUFV2	1940	1397264.705	9403000	8372400	9340300	5796500	6093100	TRUE	FALSE	FALSE	FALSE	FALSE	FALSE	6861892.941	6093100	1.126174351	4729	NDUFV2
A8K761;O96000;H3BPJ9;O96000-2;H3BV16	NDUFB10	6	7	40.1	37	0	54.492	55984000	43010000	46439000	40569000	30565000	25082000	78243000	NDUFB10	698	55984000	43010000	46439000	40569000	30565000	25082000	FALSE	FALSE	FALSE	FALSE	FALSE	FALSE	43313400	25082000	1.72687186	4716	NDUFB10
A8K7A0;P49643;I0CMJ8	PRIM2	3	2	4.9	4	0	5.7485	1945600	1828400	2222600	2548700	5690000	1946300	1395200	PRIM2	3611	1945600	1828400	2222600	2548700	5690000	1946300	FALSE	FALSE	FALSE	FALSE	FALSE	FALSE	2847060	1946300	1.462806351	5558	PRIM2
B4DDF7;A8K7B7;P30153;B4DQY1;A8K3H8;B4DE69;Q8NB89;B3KQV6;C9J9C1	PPP2R1A	16	19	54.9	122	0	223.62	211530000	185200000	202100000	196050000	203370000	211580000	107670000	PPP2R1A	534	211530000	185200000	202100000	196050000	203370000	211580000	FALSE	FALSE	FALSE	FALSE	FALSE	FALSE	199650000	211580000	0.943614708	5518	PPP2R1A
Q7Z726;Q6NVW7;A8K7D9;P52292	KPNA2	7	18	46.3	109	0	314.36	86118000	82239000	109930000	127790000	237770000	73010000	87165000	KPNA2	630	86118000	82239000	109930000	127790000	237770000	73010000	FALSE	FALSE	FALSE	FALSE	FALSE	FALSE	128769400	73010000	1.763722778	3838	KPNA2
A8K7F6;P60842;A8K088;J3KT12;P60842-2;Q59F68;J3QS69;B4DNH2;J3KTB5;J3QL43;J3KSZ0	EIF4A1	27	14	63.8	191	0	323.31	344790000	282680000	664400000	620310000	632150000	388100000	308810000	EIF4A1	206	344790000	282680000	664400000	620310000	632150000	388100000	FALSE	FALSE	FALSE	FALSE	FALSE	FALSE	508866000	388100000	1.311172378	1973	EIF4A1
A8K7F7;Q9Y3I1;Q5HYB3;Q9Y3I1-3;Q9Y3I1-2	FBXO7;DKFZp686B08113	7	3	9	9	0	5.9727	5751900	6145900	4156500	4970900	5395500	0	5729600	FBXO7	2582	5751900	6145900	4156500	4970900	5395500	2782877.611	FALSE	FALSE	FALSE	FALSE	FALSE	TRUE	5284140	2782877.611	1.898804309	25793	FBXO7
E7EW69;A8K7M3;E7EX04;B5ME97;Q9P0V9;Q9P0V9-2;Q9P0V9-3;B7Z371;Q9H9P7;Q59H84;B7Z277	10-Sep	17	7	24.2	22	0	45.3	13332000	25207000	5658200	5357400	6583200	31062000	14498000	10-Sep	1844	13332000	25207000	5658200	5357400	6583200	31062000	FALSE	FALSE	FALSE	FALSE	FALSE	FALSE	11227560	31062000	0.361456442	151011	10-Sep
A8K7N0		1	1	28	12	0	26.899	128870000	0	88199000	97065000	97599000	0	127550000	A8K7N0	462	128870000	2271054.45	88199000	97065000	97599000	1729555.016	FALSE	TRUE	FALSE	FALSE	FALSE	TRUE	82800810.89	1729555.016	47.87405437	NA
Q53GX6;A8K7Q1;Q02818;B4DZX0;C9JKZ2;H7BZI1	NUCB1	10	13	33.2	29	0	60.602	73793000	77442000	38853000	50790000	28061000	25702000	40094000	NUCB1	1124	73793000	77442000	38853000	50790000	28061000	25702000	FALSE	FALSE	FALSE	FALSE	FALSE	FALSE	53787800	25702000	2.092747646	4924	NUCB1
B4DWN1;A8K7T4;Q12907;D6RBV2;D6RIU4;D6RDX1	LMAN2	7	9	41.1	39	0	30.903	42358000	60393000	28121000	32171000	20672000	45525000	46644000	LMAN2	1015	42358000	60393000	28121000	32171000	20672000	45525000	FALSE	FALSE	FALSE	FALSE	FALSE	FALSE	36743000	45525000	0.807095003	10960	LMAN2
B3KY12;A8K7V1;Q12874;A8K566;B4DW90;Q53HM6	SF3A3	6	15	35.7	51	0	52.807	47543000	51054000	49242000	67043000	61653000	59464000	43032000	SF3A3	1076	47543000	51054000	49242000	67043000	61653000	59464000	FALSE	FALSE	FALSE	FALSE	FALSE	FALSE	55307000	59464000	0.930092157	10946	SF3A3
A8K800;Q9H7B2;Q5VXN0;B4DWS5	RPF2	4	6	22.2	24	0	22.511	16945000	13842000	15910000	15368000	13574000	12374000	15973000	RPF2	1773	16945000	13842000	15910000	15368000	13574000	12374000	FALSE	FALSE	FALSE	FALSE	FALSE	FALSE	15127800	12374000	1.222547277	84154	RPF2
A8K878;P55145	MANF	3	10	42.7	64	0	42.645	70586000	107430000	69865000	63118000	79148000	97998000	200540000	MANF	303	70586000	107430000	69865000	63118000	79148000	97998000	FALSE	FALSE	FALSE	FALSE	FALSE	FALSE	78029400	97998000	0.796234617	7873	MANF
A8K8K1;O00442;O00442-2;A6NIC1;B4DSL0	RTCA	5	4	14.8	13	0	12.912	6051500	5775600	0	5850200	5606800	5779600	5972500	RTCA	2535	6051500	5775600	3260838.719	5850200	5606800	5779600	FALSE	FALSE	TRUE	FALSE	FALSE	FALSE	5308987.744	5779600	0.918573559	8634	RTCA
A8K9T9;A8K8N7;O15067;B4DJ26	PFAS	12	20	22.9	56	0	134.74	43592000	26713000	67740000	67664000	34851000	24639000	10722000	PFAS	2058	43592000	26713000	67740000	67664000	34851000	24639000	FALSE	FALSE	FALSE	FALSE	FALSE	FALSE	48112000	24639000	1.952676651	5198	PFAS
A8K8U1;Q86VP6;Q86VP6-2;A0A0C4DGH5	CAND1	10	37	37.2	195	0	323.31	274820000	192480000	290080000	287230000	286010000	264220000	68143000	CAND1	782	274820000	192480000	290080000	287230000	286010000	264220000	FALSE	FALSE	FALSE	FALSE	FALSE	FALSE	266124000	264220000	1.007206116	55832	CAND1
A8K8X0;Q14CX7;Q14CX7-2	NAA25	3	7	8.7	18	0	20.648	7001700	3561300	6741200	6445400	6873100	5382700	1795900	NAA25	3441	7001700	3561300	6741200	6445400	6873100	5382700	FALSE	FALSE	FALSE	FALSE	FALSE	FALSE	6124540	5382700	1.13781931	80018	NAA25
A8K905;Q8WTT2;B4DXL4	NOC3L	3	9	15.4	19	0	40.702	11508000	12871000	15145000	16522000	8328800	6573200	5294100	NOC3L	2662	11508000	12871000	15145000	16522000	8328800	6573200	FALSE	FALSE	FALSE	FALSE	FALSE	FALSE	12874960	6573200	1.958705045	64318	NOC3L
A8K940;Q66K74-2;Q66K74	MAP1S	8	11	16.3	26	0	26.633	10041000	8745000	16704000	18459000	24234000	21207000	5499200	MAP1S	2627	10041000	8745000	16704000	18459000	24234000	21207000	FALSE	FALSE	FALSE	FALSE	FALSE	FALSE	15636600	21207000	0.737332013	55201	MAP1S
A8K946;O43148;O43148-2;Q05D80;K7EP06;Q05DQ2	RNMT	11	9	19.2	22	0	19.552	37408000	38158000	44904000	29891000	25958000	20197000	20667000	RNMT	1576	37408000	38158000	44904000	29891000	25958000	20197000	FALSE	FALSE	FALSE	FALSE	FALSE	FALSE	35263800	20197000	1.745991979	8731	RNMT
A8K964;Q9H307;Q9H307-2	PNN	7	14	22.2	36	0	32.943	25920000	28086000	24941000	27295000	32800000	36858000	13679000	PNN	1888	25920000	28086000	24941000	27295000	32800000	36858000	FALSE	FALSE	FALSE	FALSE	FALSE	FALSE	27808400	36858000	0.754473927	5411	PNN
Q53Y97;Q53FB7;A8K9A5;P04818;P04818-2	TYMS	6	8	30	16	0	25.335	20115000	13772000	0	7813200	24535000	10542000	16301000	TYMS	1752	20115000	13772000	1677913.923	7813200	24535000	10542000	FALSE	FALSE	TRUE	FALSE	FALSE	FALSE	13582622.78	10542000	1.288429405	7298	TYMS
A8K9D2;Q9H0U6	MRPL18	2	3	16.8	7	0	5.6791	6895500	5997400	0	0	0	5144700	13816000	MRPL18	1880	6895500	5997400	1796954.543	2306641.955	3387379.409	5144700	FALSE	FALSE	TRUE	TRUE	TRUE	FALSE	4076775.181	5144700	0.792422334	29074	MRPL18
D9YZV0;B3KNB9;A8K9E1;Q9Y450-4;Q9Y450;B7Z1K2;B7Z524;H0YDX7;J3QT46	HBS1L	19	9	18.1	19	0	21.995	10590000	10348000	12423000	15369000	12146000	16469000	5721400	HBS1L	2584	10590000	10348000	12423000	15369000	12146000	16469000	FALSE	FALSE	FALSE	FALSE	FALSE	FALSE	12175200	16469000	0.739279859	10767	HBS1L
E7EPM6;B4E0R0;A8K9T3;P33121-3;P33121;P33121-2;B7Z3Z9	ACSL1	13	15	25.2	26	0	44.727	30098000	60103000	23775000	32091000	31894000	8141600	15606000	ACSL1	1786	30098000	60103000	23775000	32091000	31894000	8141600	FALSE	FALSE	FALSE	FALSE	FALSE	FALSE	35592200	8141600	4.371646851	2180	ACSL1
E9PCB6;A8K9T8;Q9BYT8;B3KU23;Q9BQD0;Q96K48;H0YAK4	NLN	9	8	17	26	0	19.256	14423000	8611000	19876000	19424000	12972000	11064000	7443300	NLN	2359	14423000	8611000	19876000	19424000	12972000	11064000	FALSE	FALSE	FALSE	FALSE	FALSE	FALSE	15061200	11064000	1.361279826	57486	NLN
A8K9U0;Q9BWF3;E9PB51;Q9BQ04;Q9BWF3-4;E9PLB0;E9PM61;D6R9K7;U3KQD5;J3QRR5;Q9BWF3-3;Q9BWF3-2	RBM4;RBM4B	12	7	43.7	20	0	57.54	19935000	21230000	14004000	19290000	14220000	14374000	18213000	RBM4	1671	19935000	21230000	14004000	19290000	14220000	14374000	FALSE	FALSE	FALSE	FALSE	FALSE	FALSE	17735800	14374000	1.233880618	5936	RBM4;RBM4B
X5D2J9;Q499G6;X5D939;X5DNP5;A8K9W7;B4DH52;X5DR09;P78347-2;P78347-4;P78347-3;P78347;B4DRA9	GTF2I	23	16	18.9	36	0	42.266	36405000	37330000	36607000	38869000	28249000	30779000	11231000	GTF2I	2019	36405000	37330000	36607000	38869000	28249000	30779000	FALSE	FALSE	FALSE	FALSE	FALSE	FALSE	35492000	30779000	1.153123883	2969	GTF2I
A8K9X5;Q9UNN5;B1ANM7;Q9UNN5-2;B4DEJ6;B3KT28	FAF1	6	4	6.6	7	0	9.2217	4676600	6801100	7077700	17201000	7098300	5804700	4120900	FAF1	2857	4676600	6801100	7077700	17201000	7098300	5804700	FALSE	FALSE	FALSE	FALSE	FALSE	FALSE	8570940	5804700	1.47655176	11124	FAF1
A8KA19;O43592	XPOT	6	21	25.8	45	0	58.162	40934000	34568000	44643000	41164000	49012000	27693000	13851000	XPOT	1876	40934000	34568000	44643000	41164000	49012000	27693000	FALSE	FALSE	FALSE	FALSE	FALSE	FALSE	42064200	27693000	1.518947026	11260	XPOT
X6R9L0;A8KA82;Q13217	DNAJC3	3	6	15	13	0	14.155	9899300	22366000	0	4940300	4052800	3844800	8538800	DNAJC3	2245	9899300	22366000	2383431.681	4940300	4052800	3844800	FALSE	FALSE	TRUE	FALSE	FALSE	FALSE	8728366.336	3844800	2.270174349	5611	DNAJC3
A8KAH1;P48651;Q9BSY0;P48651-3;P48651-2	PTDSS1	5	4	10.6	12	0	12.963	15074000	10156000	7481900	8114600	10327000	12309000	9962400	PTDSS1	2120	15074000	10156000	7481900	8114600	10327000	12309000	FALSE	FALSE	FALSE	FALSE	FALSE	FALSE	10230700	12309000	0.831156065	9791	PTDSS1
A8KAH9;P62834;Q5U0C3;A0A075B6Q0	RAP1A	4	2	50.5	7	0	5.0741	5152200	5987900	0	0	0	9170700	9217700	RAP1A	2185	5152200	5987900	1443124.777	2638254.738	1587249.992	9170700	FALSE	FALSE	TRUE	TRUE	TRUE	FALSE	3361745.901	9170700	0.366574624	5906	RAP1A
A8KAK1;Q9NYU2-2;Q9NYU2	UGGT1	7	29	23.6	89	0	107.32	110550000	102580000	75267000	66752000	78052000	85128000	21032000	UGGT1	1558	110550000	102580000	75267000	66752000	78052000	85128000	FALSE	FALSE	FALSE	FALSE	FALSE	FALSE	86640200	85128000	1.017763838	56886	UGGT1
A8KAQ3;Q99523;Q99523-2	SORT1	6	12	16.5	26	0	50.438	9124500	24252000	3428800	7656500	6945800	1262000	13915000	SORT1	1870	9124500	24252000	3428800	7656500	6945800	1262000	FALSE	FALSE	FALSE	FALSE	FALSE	FALSE	10281520	1262000	8.147004754	6272	SORT1
Q68CX8;A8KAQ6;B4E3W1;Q9Y679-3;Q9Y679-2;Q9Y679	DKFZp686P12272;AUP1	7	4	11.5	8	0	9.3343	7440800	13765000	5977600	4806200	7416600	4072300	8401300	DKFZp686P12272	2258	7440800	13765000	5977600	4806200	7416600	4072300	FALSE	FALSE	FALSE	FALSE	FALSE	FALSE	7881240	4072300	1.93532893	550	AUP1;DKFZp686P12272
R9WQY1;A8MQB8;G3V0J0;X5D907;Q06787-6;Q06787-2;Q06787-4;Q06787-7;Q59GC1;X5DQX7;Q06787-8;Q06787-5;Q06787-9;Q06787-3;Q06787;R9WPL0;A0A087WXI3;G8JLE9;R9WNI0;W5ZQ92;Q06787-11;Q06787-10;A0A087WWR6;B4DZ17;A0A0K0MJ24;Q8IXW7	FMR1	28	4	13.6	10	0	19.427	1986500	3552400	3798800	3375900	0	2930100	1881300	FMR1	3407	1986500	3552400	3798800	3375900	3233677.195	2930100	FALSE	FALSE	FALSE	FALSE	TRUE	FALSE	3189455.439	2930100	1.088514194	2332	FMR1
Q66K91;Q5XPV6;B4DVS0;Q15182;A8MT02;P14678-2;P14678;P14678-3;J3QLE5;X5DP00;Q9UIS4;P63162;P63162-2;J3KRY3;S4R3P3;Q6LBS1;Q53HE7	SNRPB;SNRPN	18	8	31.6	63	0	40.053	85755000	90358000	116030000	127280000	95083000	125940000	138030000	SNRPB	438	85755000	90358000	116030000	127280000	95083000	125940000	FALSE	FALSE	FALSE	FALSE	FALSE	FALSE	102901200	125940000	0.817065269	6628	SNRPB;SNRPN
F8WDX0;F8WB12;F8WDS8;C9J0U9;D3YTH5;A8MUM1;Q53HC9	TSSC1	7	2	37.9	3	0.0034272	2.9063	2039000	3064500	0	2259200	0	0	7885400	TSSC1	2306	2039000	3064500	2987792.549	2259200	1599631.923	2158497.831	FALSE	FALSE	TRUE	FALSE	TRUE	TRUE	2390024.894	2158497.831	1.107263051	7260	EIPR1
Q49AN9;F5H013;P62308;A8MWD9;C9JVQ0	SNRPG;SNRPGP15	5	2	29.7	13	0	27.487	0	63815000	52924000	0	51601000	48480000	404520000	SNRPG	167	1114484.825	63815000	52924000	1541287.287	51601000	48480000	TRUE	FALSE	FALSE	TRUE	FALSE	FALSE	34199154.42	48480000	0.705428103	6637	SNRPG;SNRPGP15
A8MZF9;P55039;J3QR71;J3QRI9;J3QKW7;J3QL90;B4DIG2;J3QKV7	DRG2	12	4	15.7	11	0	7.026	2992300	6777700	4027900	3877500	2583400	3417300	3014100	DRG2	3088	2992300	6777700	4027900	3877500	2583400	3417300	FALSE	FALSE	FALSE	FALSE	FALSE	FALSE	4051760	3417300	1.185661195	1819	DRG2
A8YXX4;P15104;B4DWM6;A1L199	PIG59;GLUL	7	6	20.4	7	0	14.308	0	0	0	9109500	13048000	7281300	5654800	PIG59	2594	1468131.661	2097537.91	1353524.601	9109500	13048000	7281300	TRUE	TRUE	TRUE	FALSE	FALSE	FALSE	5415338.834	7281300	0.743732415	2752	GLUL;PIG59
A9UK01;Q8N392-2;Q8N392	ARHGAP18	3	4	6.9	7	0	6.8978	0	4253900	0	2133600	0	7558800	1868400	ARHGAP18	3410	3548718.526	4253900	4672054.199	2133600	1421557.482	7558800	TRUE	FALSE	TRUE	FALSE	TRUE	FALSE	3205966.041	7558800	0.424136906	93663	ARHGAP18
B0FLL2;O60825-2;O60825;B4DY91;Q68DE0;B4DI16	PFKFB2;DKFZp781D2217	29	8	16.9	10	0	14.271	12234000	5563500	13388000	9985400	10045000	6963200	4210100	PFKFB2	2837	12234000	5563500	13388000	9985400	10045000	6963200	FALSE	FALSE	FALSE	FALSE	FALSE	FALSE	10243180	6963200	1.471044922	5208	PFKFB2
E9PDF6;B0I1S9;O43795-2;O43795	MYO1B	13	25	29	55	0	117.07	27881000	100890000	31232000	30433000	23453000	122640000	18380000	MYO1B	1669	27881000	100890000	31232000	30433000	23453000	122640000	FALSE	FALSE	FALSE	FALSE	FALSE	FALSE	42777800	122640000	0.348807893	4430	MYO1B
Q4LE74;M0R300;M0R0P8;B0I1T6;Q13459-2;Q13459	MYO9B variant protein;MYO9B	9	11	6.5	12	0	23.304	0	6759100	8455300	9744800	6530200	4962500	920350	MYO9B variant protein	3822	2884100.122	6759100	8455300	9744800	6530200	4962500	TRUE	FALSE	FALSE	FALSE	FALSE	FALSE	6874700.024	4962500	1.38532998	4650	MYO9B;MYO9B variant protein
B0LPE5;P31749;B3KVH4;P31749-2	AKT1	7	5	15.8	7	0	18.278	10019000	11713000	6449800	0	0	8863900	4916200	AKT1	2717	10019000	11713000	6449800	1725122.033	1598911.62	8863900	FALSE	FALSE	FALSE	TRUE	TRUE	FALSE	6301166.731	8863900	0.710879718	207	AKT1
Q6ICN0;B0LPF3;P62993;B3KR50;P62993-2;J3KT38	GRB2	8	10	42.4	40	0	53.542	51554000	54807000	46850000	52786000	55466000	27027000	56965000	GRB2	883	51554000	54807000	46850000	52786000	55466000	27027000	FALSE	FALSE	FALSE	FALSE	FALSE	FALSE	52292600	27027000	1.934828135	2885	GRB2
B0QY89;Q9Y262;B4DQF6;B3KPB9;Q9Y262-2;B0QY90;B3KNG0	EIF3L	14	23	41.5	158	0	323.31	201530000	209120000	215590000	238530000	230020000	163780000	113070000	EIF3L	506	201530000	209120000	215590000	238530000	230020000	163780000	FALSE	FALSE	FALSE	FALSE	FALSE	FALSE	218958000	163780000	1.336903163	51386	EIF3L
B0QY91;Q68D58;Q641Q8;Q8N3F8	MICALL1;DKFZp686M2226;MICAL-L1	4	2	12.9	5	0	10.072	2486200	2298400	0	0	0	2580400	2078100	MICALL1	3343	2486200	2298400	1887478.602	1512081.953	1659621.735	2580400	FALSE	FALSE	TRUE	TRUE	TRUE	FALSE	1968756.458	2580400	0.762965609	85377	MICALL1
W0HJ78;B0QYD3;Q9UH17;Q9UH17-3;B7ZLZ1;A0A0K0MJ49;P31941-2;P31941	APOBEC3B;APOBEC3A	10	5	18.1	15	0	15.198	10705000	8666100	10003000	13247000	14429000	17082000	9280300	APOBEC3B	2178	10705000	8666100	10003000	13247000	14429000	17082000	FALSE	FALSE	FALSE	FALSE	FALSE	FALSE	11410020	17082000	0.667955743	9582	APOBEC3A;APOBEC3B
B0QYK0;Q01844-6;Q01844-3;Q01844;Q01844-5;A0A0D9SFL3;C9JGE3;Q01844-2;H7BY36	EWSR1	15	5	13.6	37	0	32.427	33459000	49815000	36640000	40526000	29135000	39625000	42848000	EWSR1	1077	33459000	49815000	36640000	40526000	29135000	39625000	FALSE	FALSE	FALSE	FALSE	FALSE	FALSE	37915000	39625000	0.956845426	2130	EWSR1
B4DFG6;B0S7P4;Q9Y676;A0A0G2JIC6	MRPS18B	4	2	16.5	11	0	6.0076	10163000	6297300	7810700	7599100	8405300	8402800	17159000	MRPS18B	1715	10163000	6297300	7810700	7599100	8405300	8402800	FALSE	FALSE	FALSE	FALSE	FALSE	FALSE	8055080	8402800	0.958618556	28973	MRPS18B
B0YIW5;P48444;Q6MZV5;B0YIW6;P48444-2	ARCN1;DKFZp686M09245	7	29	54.6	108	0	133.82	113610000	134320000	112760000	143230000	133670000	141170000	84465000	ARCN1	654	113610000	134320000	112760000	143230000	133670000	141170000	FALSE	FALSE	FALSE	FALSE	FALSE	FALSE	127518000	141170000	0.903293901	372	ARCN1;DKFZp686M09245
B0YJ88;P35241;P35241-5;P35241-4;B7Z2S7;Q6PKD3;Q05CU6	RDX	13	19	53.3	80	0	125.76	73784000	282600000	100670000	107350000	112560000	83647000	73300000	RDX	737	73784000	282600000	100670000	107350000	112560000	83647000	FALSE	FALSE	FALSE	FALSE	FALSE	FALSE	135392800	83647000	1.61862111	5962	RDX
B0ZBD0;Q8WVX7;P39019;A0A075B6E2	RPS19	8	14	62.8	115	0	103.84	578040000	475380000	429610000	415570000	416750000	382020000	871080000	RPS19	58	578040000	475380000	429610000	415570000	416750000	382020000	FALSE	FALSE	FALSE	FALSE	FALSE	FALSE	463070000	382020000	1.212161667	6223	RPS19
B1AH87;Q13850;P30536;Q8N730;O76068	TSPO;PBR	5	2	15	15	0	3.9877	48433000	40800000	55426000	35579000	36376000	37986000	171760000	TSPO	353	48433000	40800000	55426000	35579000	36376000	37986000	FALSE	FALSE	FALSE	FALSE	FALSE	FALSE	43322800	37986000	1.140493866	706	PBR;TSPO
Q53FG5;B1AHB0;P33992;A8K521;B1AHB1;B4DQ39;B3KVF0;B4DVK5;Q59F49	MCM5	11	20	37.2	70	0	72.397	50338000	36058000	67727000	104470000	118450000	118480000	29736000	MCM5	1310	50338000	36058000	67727000	104470000	118450000	118480000	FALSE	FALSE	FALSE	FALSE	FALSE	FALSE	75408600	118480000	0.636466914	4174	MCM5
Q6FHM6;B1AHD1;P55769	NHP2L1	3	7	68.8	55	0	106.09	80004000	83558000	66668000	82713000	95203000	102920000	165840000	NHP2L1	367	80004000	83558000	66668000	82713000	95203000	102920000	FALSE	FALSE	FALSE	FALSE	FALSE	FALSE	81629200	102920000	0.79313253	4809	SNU13;NHP2L1
B1AJQ6;Q6LEU0;Q86Y82	STX12	4	5	30.7	14	0	117.2	10806000	17822000	7249200	8071000	7521700	7800100	15855000	STX12	1776	10806000	17822000	7249200	8071000	7521700	7800100	FALSE	FALSE	FALSE	FALSE	FALSE	FALSE	10293980	7800100	1.319724106	23673	STX12
B1AJY7;O75832;B1AJY5;O75832-2	PSMD10	5	6	42.5	13	0	12.7	9012000	17444000	0	0	0	9356200	18454000	PSMD10	1666	9012000	17444000	4778507.738	4743926.156	1630836.392	9356200	FALSE	FALSE	TRUE	TRUE	TRUE	FALSE	7521854.057	9356200	0.803943274	5716	PSMD10
B1AK13;P35914	HMGCL	5	5	21.3	10	0	15.804	4973800	5344400	5675500	6099800	4427300	9430100	6773400	HMGCL	2439	4973800	5344400	5675500	6099800	4427300	9430100	FALSE	FALSE	FALSE	FALSE	FALSE	FALSE	5304160	9430100	0.562471236	3155	HMGCL
B1AKJ5;O43847;O43847-2;B4DRI0;Q6UUU9;G3V1R5;A0A087WYK8;Q96L67;F5H7V1;B4DYV0;H0Y5G9	NRD1	11	17	15.3	39	0	44.835	36990000	25413000	27173000	28420000	32144000	21696000	11124000	NRD1	2029	36990000	25413000	27173000	28420000	32144000	21696000	FALSE	FALSE	FALSE	FALSE	FALSE	FALSE	30028000	21696000	1.384033923	4898	NRDC;NRD1
B1AKV3;Q3KRB6;Q9NVA1-2;Q9NVA1;B7Z314;Q59FR0;B1AKV2;B1AKV6;Q9NVA1-5;B1AKV4;F6UTR7;Q9NVA1-4	UQCC1;UQCC	18	4	15.7	13	0	14.977	3565200	4584300	10059000	11979000	5957300	20133000	10413000	UQCC1	2084	3565200	4584300	10059000	11979000	5957300	20133000	FALSE	FALSE	FALSE	FALSE	FALSE	FALSE	7228960	20133000	0.359060249	55245	UQCC1;UQCC
Q6FHL9;B1AKZ4;Q15121;Q15121-2;B1AKZ5	PEA15	5	6	53.1	37	0	71.942	30697000	105580000	24406000	19314000	24962000	55272000	131490000	PEA15	452	30697000	105580000	24406000	19314000	24962000	55272000	FALSE	FALSE	FALSE	FALSE	FALSE	FALSE	40991800	55272000	0.741637719	8682	PEA15
H0Y6Y8;B1AL05;Q8N983-4;Q8N983-3;Q8N983-2;Q8N983;Q8N983-6;Q8N983-7;A8K4V4;M0R051;H0YBU8	MRPL43	12	4	24.3	6	0	7.5956	14141000	11291000	9380300	8851300	5949600	6035000	19949000	MRPL43	1602	14141000	11291000	9380300	8851300	5949600	6035000	FALSE	FALSE	FALSE	FALSE	FALSE	FALSE	9922640	6035000	1.64418227	84545	MRPL43
Q541S4;Q548C9;B1AMS2;Q6B514;B4DZW0;Q8NFH9;Q14141-2;Q14141-4;Q14141;Q6NT82;B4E049;B4DPT4;Q8NFI2;Q8NFI0	6-Sep	16	4	30.9	5	0	12.226	8987400	5001400	9212800	5017100	0	0	3932700	6-Sep	2893	8987400	5001400	9212800	5017100	3306284.612	1617368.807	FALSE	FALSE	FALSE	FALSE	TRUE	TRUE	6304996.922	1617368.807	3.89830501	23157	6-Sep
B1ANR0;Q6IQ30;Q13310-2;Q13310;Q13310-3;H0Y5F5	PABPC4	18	12	36.7	52	0	43.582	41362000	68371000	70572000	90344000	66688000	49076000	28875000	PABPC4	1337	41362000	68371000	70572000	90344000	66688000	49076000	FALSE	FALSE	FALSE	FALSE	FALSE	FALSE	67467400	49076000	1.374753444	8761	PABPC4
B1AQP2;Q9UHV9	PFDN2	2	4	30.5	31	0	185.91	30774000	45928000	34446000	31292000	45524000	35020000	68388000	PFDN2	778	30774000	45928000	34446000	31292000	45524000	35020000	FALSE	FALSE	FALSE	FALSE	FALSE	FALSE	37592800	35020000	1.073466591	5202	PFDN2
Q96IR1;Q53HV1;B2R491;P62701	RPS4X	5	9	61.7	70	0	191.44	223900000	193240000	242860000	247180000	290810000	242220000	273920000	RPS4X	234	223900000	193240000	242860000	247180000	290810000	242220000	FALSE	FALSE	FALSE	FALSE	FALSE	FALSE	239598000	242220000	0.98917513	6191	RPS4X
B2R4A2;P14927;B7Z2R2;P14927-2;E5RHG9	UQCRB	5	5	40.5	30	0	33.458	64379000	43715000	33627000	37627000	33240000	53836000	153660000	UQCRB	396	64379000	43715000	33627000	37627000	33240000	53836000	FALSE	FALSE	FALSE	FALSE	FALSE	FALSE	42517600	53836000	0.789761498	7381	UQCRB
H7C2W9;C9JU56;B7Z4E3;B2R4C1;B7Z4C8;P62899-3;P62899;P62899-2;B8ZZK4	RPL31	10	6	50.9	29	0	25.774	238700000	221960000	299580000	314350000	314200000	243900000	720200000	RPL31	87	238700000	221960000	299580000	314350000	314200000	243900000	FALSE	FALSE	FALSE	FALSE	FALSE	FALSE	277758000	243900000	1.138819188	6160	RPL31
Q2LE71;B2R4D5;O15145;B4DM63;C9JZD1	ARPC3	6	8	40.4	41	0	56.12	104020000	123940000	82720000	66186000	80675000	118270000	179080000	ARPC3	339	104020000	123940000	82720000	66186000	80675000	118270000	FALSE	FALSE	FALSE	FALSE	FALSE	FALSE	91508200	118270000	0.773722838	10094	ARPC3
B2R4I8;Q92572;F5H459	AP3S1	3	4	22.8	11	0	11.872	22555000	12070000	8352400	8914100	6830700	11938000	26067000	AP3S1	1421	22555000	12070000	8352400	8914100	6830700	11938000	FALSE	FALSE	FALSE	FALSE	FALSE	FALSE	11744440	11938000	0.983786229	1176	AP3S1
B2R4R0;P62805;Q0VAS5	HIST1H4H;HIST1H4A	4	10	60.2	193	0	323.31	2062300000	3024400000	6386700000	6765700000	6053200000	5.39E+09	1.14E+10	HIST1H4H	1	2062300000	3024400000	6386700000	6765700000	6053200000	5.39E+09	FALSE	FALSE	FALSE	FALSE	FALSE	FALSE	4858460000	5.39E+09	0.901551308	121504	HIST1H4A; HIST1H4B; HIST1H4C; HIST1H4D; HIST1H4E; HIST1H4F; HIST1H4H; HIST1H4I; HIST1H4J; HIST1H4K; HIST1H4L; HIST2H4A; HIST2H4B; HIST4H4;HIST1H4L
B2R4R9;P62857	RPS28	2	3	46.4	16	0	142.17	170120000	180230000	62827000	42846000	35461000	46634000	668600000	RPS28	97	170120000	180230000	62827000	42846000	35461000	46634000	FALSE	FALSE	FALSE	FALSE	FALSE	FALSE	98296800	46634000	2.107835485	6234	RPS28
B2R4W8;P62244;I3L3P7;A8K7H3	hCG_1994130;RPS15A	5	3	56.9	28	0	126.36	54592000	30104000	74017000	84510000	74551000	49884000	99268000	hCG_1994130	574	54592000	30104000	74017000	84510000	74551000	49884000	FALSE	FALSE	FALSE	FALSE	FALSE	FALSE	63554800	49884000	1.2740518	6210	RPS15A
B2R514;E7EM64;Q7L5N1	COPS6	5	8	37.4	22	0	27.267	21941000	21349000	22756000	26699000	21104000	23084000	32998000	COPS6	1247	21941000	21349000	22756000	26699000	21104000	23084000	FALSE	FALSE	FALSE	FALSE	FALSE	FALSE	22769800	23084000	0.986388841	10980	COPS6
B2R5H5;P62310	LSM3	2	2	19.6	7	0	4.5268	11134000	0	21207000	22554000	21361000	19816000	85818000	LSM3	642	11134000	2055958.231	21207000	22554000	21361000	19816000	FALSE	TRUE	FALSE	FALSE	FALSE	FALSE	15662391.65	19816000	0.790391181	27258	LSM3
B2R5J1;I3L3J4;H6UMI1;Q6IAW1;O95166	GABARAP	5	2	15.4	6	0.00026302	3.8012	0	0	12422000	13422000	12886000	11102000	36039000	GABARAP	1191	1882336.843	2279869.488	12422000	13422000	12886000	11102000	TRUE	TRUE	FALSE	FALSE	FALSE	FALSE	8578441.266	11102000	0.772693322	11337	GABARAP
Q8N5Y3;B2R5R5;P46976-2;P46976;C9JQ42;G5E9W8;B4DSX6;P46976-3	GYG1	10	6	22.4	32	0	21.052	21733000	25335000	25156000	31634000	24833000	34468000	35806000	GYG1	1195	21733000	25335000	25156000	31634000	24833000	34468000	FALSE	FALSE	FALSE	FALSE	FALSE	FALSE	25738200	34468000	0.746727399	2992	GYG1
Q5QP19;Q53FP3;B2R5S3;Q9Y697-2;Q9Y697;Q9Y697-3;B4DNL7;F2Z2E7	NFS1	16	6	20.7	19	0	24.431	15314000	12281000	11072000	10268000	12065000	14652000	10256000	NFS1	2094	15314000	12281000	11072000	10268000	12065000	14652000	FALSE	FALSE	FALSE	FALSE	FALSE	FALSE	12200000	14652000	0.832650833	9054	NFS1
B2R5T5;P10644;Q68DQ4;P10644-2;K7EPB2;K7EM13	PRKAR1A;DKFZp779L0468	27	14	37.8	69	0	65.497	68427000	93118000	92379000	98250000	102500000	47392000	66085000	PRKAR1A	793	68427000	93118000	92379000	98250000	102500000	47392000	FALSE	FALSE	FALSE	FALSE	FALSE	FALSE	90934800	47392000	1.918779541	5573	PRKAR1A;DKFZp779L0468
G3V4W0;B4DY08;B2R5W2;G3V4C1;P07910-2;B2R603;G3V2Q1;A8K9A4;P07910;G3V576;P07910-4;B3KX96;D3DPI2;G3V2D6;P07910-3;G3V555;G3V5V7;G3V575;B4DQQ2	HNRNPC;hCG_1641229	39	17	52.3	164	0	213.63	545430000	495600000	624450000	729620000	638560000	723260000	765200000	HNRNPC	77	545430000	495600000	624450000	729620000	638560000	723260000	FALSE	FALSE	FALSE	FALSE	FALSE	FALSE	606732000	723260000	0.838885048	3183	HNRNPC
Q9UK43;Q95HA6;B2R5Y4;Q13123;Q9Y3Z5;D6REL4;Q9H4P6;E7EQZ7	CSA2;IK;DKFZp564B112	11	7	13.1	17	0	18.143	9162600	9805300	11797000	12747000	10326000	11037000	8513500	CSA2	2248	9162600	9805300	11797000	12747000	10326000	11037000	FALSE	FALSE	FALSE	FALSE	FALSE	FALSE	10767580	11037000	0.975589381	3550	CSA2;IK
B4DT77;B4DWU2;B4DHY4;Q53HM8;B2R657;P20073-2;P20073;B2R7L2	ANXA7	8	14	48.2	58	0	76.472	53245000	48176000	68800000	62311000	43572000	64201000	52516000	ANXA7	930	53245000	48176000	68800000	62311000	43572000	64201000	FALSE	FALSE	FALSE	FALSE	FALSE	FALSE	55220800	64201000	0.860123674	310	ANXA7
Q6IAU5;B2R665;O15355;B4DDC8;B3KXL8;Q96IN7;Q59GB2	PPM1G	7	15	32.1	58	0	79.544	59071000	62171000	52952000	67365000	79088000	39086000	43164000	PPM1G	1071	59071000	62171000	52952000	67365000	79088000	39086000	FALSE	FALSE	FALSE	FALSE	FALSE	FALSE	64129400	39086000	1.640725579	5496	PPM1G
B2R673;O00330-3;O00330;H0YD97;O00330-2	PDHX	7	6	13.8	13	0	12.417	8419600	7353700	9775800	10330000	9745300	7942000	6947500	PDHX	2413	8419600	7353700	9775800	10330000	9745300	7942000	FALSE	FALSE	FALSE	FALSE	FALSE	FALSE	9124880	7942000	1.148939814	8050	PDHX
B7Z6B3;B2R6C4;Q00765;B7Z2A3	REEP5	9	3	19.2	15	0	25.649	23821000	32154000	22034000	23330000	31817000	21459000	78520000	REEP5	694	23821000	32154000	22034000	23330000	31817000	21459000	FALSE	FALSE	FALSE	FALSE	FALSE	FALSE	26631200	21459000	1.241027075	7905	REEP5
E7EU96;B5BUH5;B2R6D7;Q5U5J2;P68400;Q2I0Y7;Q8NEV1;P68400-2	CSNK2A1;CSNK2A3	12	14	43.4	60	0	63.669	55703000	59277000	44459000	40877000	50859000	81430000	51919000	CSNK2A1	941	55703000	59277000	44459000	40877000	50859000	81430000	FALSE	FALSE	FALSE	FALSE	FALSE	FALSE	50235000	81430000	0.61691023	1457	CSNK2A1;CSNK2A3
B4DKX4;B2R6E2;Q53EL6-2;Q53EL6;Q5VZS7	PDCD4	5	8	27.3	11	0	17.089	6710900	6724400	12212000	9480500	7868700	12262000	8636100	PDCD4	2236	6710900	6724400	12212000	9480500	7868700	12262000	FALSE	FALSE	FALSE	FALSE	FALSE	FALSE	8599300	12262000	0.701296689	27250	PDCD4
B2R6F3;P84103-2;P84103;A0A087X2D0	SFRS3;SRSF3	4	7	40.2	33	0	38.763	216740000	238080000	48290000	54317000	40776000	53815000	339960000	SFRS3	185	216740000	238080000	48290000	54317000	40776000	53815000	FALSE	FALSE	FALSE	FALSE	FALSE	FALSE	119640600	53815000	2.223183127	6428	SFRS3;SRSF3
Q6NUR7;B2R6J2;P15311;V9HW42;E7EQR4;B7Z5V2;B7Z437;J7M2B1	EZR;HEL-S-105;EZR-ROS1	16	26	60.6	84	0	245.69	113330000	102840000	120950000	126670000	99263000	27990000	92847000	EZR	599	113330000	102840000	120950000	126670000	99263000	27990000	FALSE	FALSE	FALSE	FALSE	FALSE	FALSE	112610600	27990000	4.023244016	7430	EZR;EZR-ROS1;HEL-S-105
B2R6L0;Q13885;A0A024QZU2;O43209;Q9UGA2;B7Z4N1;A5D907;A5D906	TUBB2A;TUBB2B;DKFZp566F223	12	2	68.8	12	0	323.31	0	13144000	72360000	67408000	0	61134000	25625000	TUBB2A	1429	1723191.477	13144000	72360000	67408000	2479374.186	61134000	TRUE	FALSE	FALSE	FALSE	TRUE	FALSE	31422913.13	61134000	0.514000607	7280	TUBB2A;TUBB2B
C9J3L8;C9J5W0;B2R6N9;E9PAL7;C9IZQ1;P43307;P43307-2	SSR1	7	2	9.8	22	0	18.646	39258000	28092000	13268000	19463000	13048000	20762000	44390000	SSR1	1053	39258000	28092000	13268000	19463000	13048000	20762000	FALSE	FALSE	FALSE	FALSE	FALSE	FALSE	22625800	20762000	1.089769772	6745	SSR1
K4RH61;B2R6P3;P50281;F8W1B7	MMP14	4	8	16.7	16	0	47.889	0	17815000	12787000	9886400	25597000	21208000	9438400	MMP14	2167	1727519.807	17815000	12787000	9886400	25597000	21208000	TRUE	FALSE	FALSE	FALSE	FALSE	FALSE	13562583.96	21208000	0.639503205	4323	MMP14
B2R6S9;P30533;A8K8F6	LRPAP1	4	18	42.6	49	0	58.954	236040000	94752000	46428000	90244000	34211000	38897000	96955000	LRPAP1	580	236040000	94752000	46428000	90244000	34211000	38897000	FALSE	FALSE	FALSE	FALSE	FALSE	FALSE	100335000	38897000	2.579504846	4043	LRPAP1
B4E2L8;B2R6V9;P00488;Q9NQP5;A6PVK5	F13A1	5	2	4	3	0	4.5341	3890500	4385300	0	0	0	7378500	1800100	F13A1	3439	3890500	4385300	1959777.298	4581128.051	2096334.765	7378500	FALSE	FALSE	TRUE	TRUE	TRUE	FALSE	3382608.023	7378500	0.45844115	2162	F13A1
E5RIZ4;B2R739;Q9P015;E5RHF4	MRPL15	4	3	12.2	6	0	4.8153	6949500	4396100	0	4615500	4707800	4439900	5792900	MRPL15	2568	6949500	4396100	1543738.351	4615500	4707800	4439900	FALSE	FALSE	TRUE	FALSE	FALSE	FALSE	4442527.67	4439900	1.000591831	29088	MRPL15
B2R761;P22307-4;P22307-8;P22307;P22307-7;P22307-6;P22307-2	SCP2	13	11	21.6	48	0	97.602	39785000	79055000	51879000	51499000	45044000	39232000	35280000	SCP2	1208	39785000	79055000	51879000	51499000	45044000	39232000	FALSE	FALSE	FALSE	FALSE	FALSE	FALSE	53452400	39232000	1.362469413	6342	SCP2
B2R769;Q6P179-3;Q6P179;D6RGW0	ERAP2	7	3	4.3	4	0	7.177	4755700	0	3761100	2803500	0	0	727880	ERAP2	3917	4755700	1538400.493	3761100	2803500	1512665.841	5731691.745	FALSE	TRUE	FALSE	FALSE	TRUE	TRUE	2874273.267	5731691.745	0.501470315	64167	ERAP2
B4DM28;B4DLS8;Q53GV6;B2R791;O43395;O43395-3	PRPF3	6	4	7.1	8	0	6.3597	7395500	8854100	4680600	0	6419900	4985300	3314800	PRPF3	3016	7395500	8854100	4680600	2712008.957	6419900	4985300	FALSE	FALSE	FALSE	TRUE	FALSE	FALSE	6012421.791	4985300	1.206030087	9129	PRPF3
B2R7C2;O43264-2;O43264;B4E1J7	ZW10	6	5	7.4	11	0	39.447	6442600	4633800	8082300	11418000	6946100	7273100	2563600	ZW10	3199	6442600	4633800	8082300	11418000	6946100	7273100	FALSE	FALSE	FALSE	FALSE	FALSE	FALSE	7504560	7273100	1.031824119	9183	ZW10
B4E394;B2R7D2;Q9UNW1;Q9UNW1-3;Q9UNW1-4;Q9UNW1-2	MINPP1	6	2	7.5	4	0	6.0484	5003500	3123400	0	0	2104700	4771700	3034700	MINPP1	3083	5003500	3123400	2361991.329	1437523.007	2104700	4771700	FALSE	FALSE	TRUE	TRUE	FALSE	FALSE	2806222.867	4771700	0.588097086	9562	MINPP1
B2R7E8;P15927;P15927-2;P15927-3;B4DL94;Q5TEJ0;B4DUL2;Q5TEJ7;B4DQD9	RPA2	9	4	20.7	27	0	14.037	28600000	32277000	38991000	37392000	31904000	54443000	62854000	RPA2	824	28600000	32277000	38991000	37392000	31904000	54443000	FALSE	FALSE	FALSE	FALSE	FALSE	FALSE	33832800	54443000	0.621435263	6118	RPA2
B2R7I0;Q9Y320;B7Z4Y0;Q9Y320-2	TMX2	9	6	20.6	12	0	27.155	14963000	17735000	7031200	11368000	7821400	4279300	15640000	TMX2	1785	14963000	17735000	7031200	11368000	7821400	4279300	FALSE	FALSE	FALSE	FALSE	FALSE	FALSE	11783720	4279300	2.753655972	51075	TMX2
B2R7M1;F5GYQ1;P61421;J3QL14;R4GN72;B7Z6L9;B7Z788	ATP6V0D1	10	10	39.9	35	0	46.389	37631000	40074000	25387000	32012000	30544000	24649000	46241000	ATP6V0D1	1026	37631000	40074000	25387000	32012000	30544000	24649000	FALSE	FALSE	FALSE	FALSE	FALSE	FALSE	33129600	24649000	1.344054526	9114	ATP6V0D1
Q53F03;B2R7N6;P43007;B7Z9M1;B7Z561;Q9P2X2;P43007-2	SLC1A4	7	8	24.4	17	0	30.78	78837000	29179000	22716000	15739000	20324000	14310000	35004000	SLC1A4	1215	78837000	29179000	22716000	15739000	20324000	14310000	FALSE	FALSE	FALSE	FALSE	FALSE	FALSE	33359000	14310000	2.331167016	6509	SLC1A4
B2R7T8;P47756-2;B1AK87;B1AK88;B4DWA6;P47756;B1AK85	CAPZB	8	18	61.8	121	0	214.45	173090000	250900000	149850000	169350000	172250000	211420000	225580000	CAPZB	277	173090000	250900000	149850000	169350000	172250000	211420000	FALSE	FALSE	FALSE	FALSE	FALSE	FALSE	183088000	211420000	0.865991865	832	CAPZB
Q6FH11;B2R7U4;P09601;Q96DI8;F2YMD9;B1AHA8	HMOX1	7	10	50.7	21	0	55.43	19334000	12733000	4333000	9457500	5056300	66136000	20951000	HMOX1	1560	19334000	12733000	4333000	9457500	5056300	66136000	FALSE	FALSE	FALSE	FALSE	FALSE	FALSE	10182760	66136000	0.153966977	3162	HMOX1
Q6IAP9;Q5T1M7;B2R7V4;Q59EL4;O43172-2;O43172	PRPF4	6	12	26.7	39	0	37.449	17795000	16806000	17680000	16798000	23999000	18949000	10533000	PRPF4	2075	17795000	16806000	17680000	16798000	23999000	18949000	FALSE	FALSE	FALSE	FALSE	FALSE	FALSE	18615600	18949000	0.982405404	9128	PRPF4
B2R7W3;O75934;Q53HE3	BCAS2	3	5	35.6	14	0	49.618	13335000	11003000	11309000	9901200	0	13848000	16460000	BCAS2	1742	13335000	11003000	11309000	9901200	1559033.713	13848000	FALSE	FALSE	FALSE	FALSE	TRUE	FALSE	9421446.743	13848000	0.680347107	10286	BCAS2
B2R7X3;Q13112	CHAF1B	2	2	3.9	7	0	11.972	9368100	10020000	6998700	6209200	7801500	15262000	6811100	CHAF1B	2436	9368100	10020000	6998700	6209200	7801500	15262000	FALSE	FALSE	FALSE	FALSE	FALSE	FALSE	8079500	15262000	0.529386712	8208	CHAF1B
B2R802;P09012;M0R268;M0R221;M0R2B8;M0QXK2	SNRPA	9	7	39	19	0	86.642	56978000	23049000	20010000	11110000	19036000	38005000	49357000	SNRPA	974	56978000	23049000	20010000	11110000	19036000	38005000	FALSE	FALSE	FALSE	FALSE	FALSE	FALSE	26036600	38005000	0.685083542	6626	SNRPA
B2R823;Q9NRX1;F8WBJ6	PNO1	3	5	27.4	16	0	21.434	7056300	6260700	11082000	11888000	11486000	5314500	8238700	PNO1	2273.5	7056300	6260700	11082000	11888000	11486000	5314500	FALSE	FALSE	FALSE	FALSE	FALSE	FALSE	9554600	5314500	1.797836109	56902	PNO1
B2R858;P26196	DDX6	3	13	38.6	67	0	74.215	60738000	77630000	75698000	76365000	77311000	73568000	46355000	DDX6	1023	60738000	77630000	75698000	76365000	77311000	73568000	FALSE	FALSE	FALSE	FALSE	FALSE	FALSE	73548400	73568000	0.99973358	1656	DDX6
B2R932;P14209-3;P14209;A0A096LP69	CD99	4	2	13	11	0	26.923	0	10526000	8240100	0	7524100	15383000	58148000	CD99	867	3177075.145	10526000	8240100	2422093.651	7524100	15383000	TRUE	FALSE	FALSE	TRUE	FALSE	FALSE	6377873.759	15383000	0.414605328	4267	CD99
V9HW51;B2R960;O43396;Q59G46;K7ER96	HEL-S-114;TXNL1	9	11	52.6	53	0	80.919	64881000	55817000	47742000	49215000	39234000	47887000	71911000	HEL-S-114	752	64881000	55817000	47742000	49215000	39234000	47887000	FALSE	FALSE	FALSE	FALSE	FALSE	FALSE	51377800	47887000	1.072896611	9352	HEL-S-114;TXNL1
V9HWG9;B2R983;P78417;Q5TA02;P78417-3;P78417-2;Q5TA01	HEL-S-21;GSTO1	7	15	49.4	141	0	127.25	594390000	502070000	580950000	545380000	271050000	226710000	545480000	HEL-S-21	131	594390000	502070000	580950000	545380000	271050000	226710000	FALSE	FALSE	FALSE	FALSE	FALSE	FALSE	498768000	226710000	2.200026466	9446	GSTO1;HEL-S-21
V9HW69;B2R9S4;P40121;B4DU58;P40121-2;E7ENU9	HEL-S-66;CAPG	8	11	47.4	47	0	120.46	0	318020000	305550000	419560000	191230000	4435600	152850000	HEL-S-66	398	1837314.405	318020000	305550000	419560000	191230000	4435600	TRUE	FALSE	FALSE	FALSE	FALSE	FALSE	247239462.9	4435600	55.73980135	822	CAPG;HEL-S-66
B2R9T9;Q9BVC6;B4E1S3	TMEM109	3	4	12.8	10	0	30.044	63432000	37315000	19639000	23175000	26762000	24592000	87752000	TMEM109	626	63432000	37315000	19639000	23175000	26762000	24592000	FALSE	FALSE	FALSE	FALSE	FALSE	FALSE	34064600	24592000	1.385190306	79073	TMEM109
B2RA56;Q969V3-2;Q969V3;K7EMW4;A0A0C4DGP7	NCLN	8	13	27.2	41	0	56.856	41474000	46089000	31901000	24942000	39094000	41171000	26579000	NCLN	1408	41474000	46089000	31901000	24942000	39094000	41171000	FALSE	FALSE	FALSE	FALSE	FALSE	FALSE	36700000	41171000	0.891404144	56926	NCLN
B2RAH5;O14974;O14974-5;O14974-4;O14974-3;O14974-2;A0A024RBF1;F8VZN8;H0YHI8	PPP1R12A	16	13	16.4	25	0	68.405	34746000	33654000	23989000	17864000	15424000	38196000	10948000	PPP1R12A	2041	34746000	33654000	23989000	17864000	15424000	38196000	FALSE	FALSE	FALSE	FALSE	FALSE	FALSE	25135400	38196000	0.658063672	4659	PPP1R12A
Q9UM02;B2RAH7;P48147	PREP	3	27	44.6	82	0	127.47	283840000	338990000	367460000	363040000	239350000	269850000	115450000	PREP	498	283840000	338990000	367460000	363040000	239350000	269850000	FALSE	FALSE	FALSE	FALSE	FALSE	FALSE	318536000	269850000	1.180418751	5550	PREP
B2RAK1;Q9UIQ6-3;Q9UIQ6-2;Q9UIQ6	LNPEP	4	8	7.6	17	0	16.248	10393000	10318000	6687800	6292500	6548200	8748600	3248500	LNPEP	3032	10393000	10318000	6687800	6292500	6548200	8748600	FALSE	FALSE	FALSE	FALSE	FALSE	FALSE	8047900	8748600	0.919907185	4012	LNPEP
B2RAX6;Q9Y5J1	UTP18	7	7	17.9	13	0	15.006	9405100	10806000	15530000	17105000	14856000	7083800	7128000	UTP18	2392	9405100	10806000	15530000	17105000	14856000	7083800	FALSE	FALSE	FALSE	FALSE	FALSE	FALSE	13540420	7083800	1.911462774	51096	UTP18
B2RAY1;Q92783-2;Q92783;B4DZT2;A6NMU3	STAM	6	6	22.2	19	0	98.995	7922500	9517500	13860000	15917000	15361000	13984000	11797000	STAM	1979	7922500	9517500	13860000	15917000	15361000	13984000	FALSE	FALSE	FALSE	FALSE	FALSE	FALSE	12515600	13984000	0.894994279	8027	STAM
B2RB23;P42765;A0A0B4J2A4;B3KNP8;K7EME0	ACAA2	8	14	46.9	54	0	68.523	73088000	35162000	55027000	50103000	58872000	71216000	51548000	ACAA2	943	73088000	35162000	55027000	50103000	58872000	71216000	FALSE	FALSE	FALSE	FALSE	FALSE	FALSE	54450400	71216000	0.764580993	10449	ACAA2
Q8NBL9;B2RBB2;Q96S52;Q96S52-2	PIGS	5	3	7.6	11	0	11.02	5089400	4174000	8656700	9721700	9516000	11898000	4441100	PIGS	2796	5089400	4174000	8656700	9721700	9516000	11898000	FALSE	FALSE	FALSE	FALSE	FALSE	FALSE	7431560	11898000	0.624605816	94005	PIGS
B2RBE5;Q9BXJ9;A0A0B4J1W3;B4E2T6;Q58F05;Q9BXJ9-4	NAA15;NARG1	14	23	25.5	82	0	65.918	100830000	72799000	70618000	81552000	83841000	79684000	26629000	NAA15	1403	100830000	72799000	70618000	81552000	83841000	79684000	FALSE	FALSE	FALSE	FALSE	FALSE	FALSE	81928000	79684000	1.028161237	80155	NAA15
Q6NZX3;Q53Z63;B2RBH2;P21589;P21589-2	NT5E	9	16	37.1	43	0	90.433	0	25400000	2784500	0	2935200	193440000	32959000	NT5E	1249	3551675.535	25400000	2784500	4608144.312	2935200	193440000	TRUE	FALSE	FALSE	TRUE	FALSE	FALSE	7855903.969	193440000	0.04061158	4907	NT5E
Q53GS5;B2RBI2;Q96A49;B4E1C9	SYAP1	4	4	12.5	11	0	22.931	19143000	24796000	18925000	21835000	23299000	12659000	34507000	SYAP1	1227	19143000	24796000	18925000	21835000	23299000	12659000	FALSE	FALSE	FALSE	FALSE	FALSE	FALSE	21599600	12659000	1.706264318	94056	SYAP1
Q6DHZ8;B2RBM8;Q9H2P0;E9PQK8	ADNP	4	6	7	8	0	12.135	5290500	4386200	0	11252000	7387600	3761000	1739100	ADNP	3470	5290500	4386200	2364099.169	11252000	7387600	3761000	FALSE	FALSE	TRUE	FALSE	FALSE	FALSE	6136079.834	3761000	1.631502216	23394	ADNP
J3JZZ9;B2RBP3;Q8TBC4-2;Q8TBC4;B7Z5F6;F8W8D4	UBE1C;UBA3	7	7	25.7	13	0	39.174	22492000	17328000	28196000	26617000	32017000	19195000	14448000	UBE1C	1846	22492000	17328000	28196000	26617000	32017000	19195000	FALSE	FALSE	FALSE	FALSE	FALSE	FALSE	25330000	19195000	1.319614483	9039	UBA3;UBE1C
Q53F98;B2RBY4;P49642;F8VSB2	PRIM1	4	2	4.8	2	0.00026434	3.8793	2579500	1198200	0	0	0	837800	987950	PRIM1	3788	2579500	1198200	1141607.1	1982399.28	1733640.814	837800	FALSE	FALSE	TRUE	TRUE	TRUE	FALSE	1727069.439	837800	2.06143404	5557	PRIM1
B2RCJ6;Q9BZH6;Q9NVU3;Q659C9	WDR11;DKFZp434L1715	9	7	6	19	0	15.546	433560000	436970000	52518000	43895000	32045000	150090000	80777000	WDR11	679	433560000	436970000	52518000	43895000	32045000	150090000	FALSE	FALSE	FALSE	FALSE	FALSE	FALSE	199797600	150090000	1.331185289	55717	DKFZp434L1715;WDR11
B4E266;B2RCM2;Q9P2J5;B4DER1;Q9P2J5-2;Q9H8E3;Q9P2J5-3	LARS	16	37	40.5	140	0	218.13	163270000	94969000	141580000	175970000	155450000	153040000	44666000	LARS	1049	163270000	94969000	141580000	175970000	155450000	153040000	FALSE	FALSE	FALSE	FALSE	FALSE	FALSE	146247800	153040000	0.955618139	51520	LARS
B2RD27;P51665;H3BNT7;H3BTM8;B4DXI8	PSMD7	6	10	41.4	77	0	128.36	83919000	93821000	90578000	106560000	110490000	101390000	107790000	PSMD7	533	83919000	93821000	90578000	106560000	110490000	101390000	FALSE	FALSE	FALSE	FALSE	FALSE	FALSE	97073600	101390000	0.957427754	5713	PSMD7
B2RD36;Q96DG6	CMBL	2	3	11.4	4	0	7.117	0	0	9648900	11807000	6867100	17278000	5756300	CMBL	2574	2732523.63	1936158.592	9648900	11807000	6867100	17278000	TRUE	TRUE	FALSE	FALSE	FALSE	FALSE	6598336.444	17278000	0.381892374	134147	CMBL
B2RD51;O95456-2;O95456	PSMG1	4	7	29.5	19	0	33.871	11885000	16870000	11208000	14883000	15312000	8965800	16314000	PSMG1	1750	11885000	16870000	11208000	14883000	15312000	8965800	FALSE	FALSE	FALSE	FALSE	FALSE	FALSE	14031600	8965800	1.565013719	8624	PSMG1
B2RD79;P54578-2;P54578;A6NJA2;D3DUG9;P54578-3;B3KTG4	USP14	9	19	44.9	66	0	80.979	109260000	56441000	82118000	84930000	123230000	70124000	58091000	USP14	868	109260000	56441000	82118000	84930000	123230000	70124000	FALSE	FALSE	FALSE	FALSE	FALSE	FALSE	91195800	70124000	1.300493412	9097	USP14
B5MCF9;B2RDF2;O00541-2;O00541;B3KXD6;B3KTZ6	PES1	9	14	24.9	66	0	45.414	88101000	68427000	80654000	89355000	70767000	38553000	37918000	PES1	1155	88101000	68427000	80654000	89355000	70767000	38553000	FALSE	FALSE	FALSE	FALSE	FALSE	FALSE	79460800	38553000	2.061079553	23481	PES1
B2RDF5;Q9UBT2;B3KMZ6;Q9UBT2-2;K7EPL2	UBA2	11	22	47.3	76	0	101.94	88376000	96326000	61257000	72900000	64404000	94579000	53204000	UBA2	922	88376000	96326000	61257000	72900000	64404000	94579000	FALSE	FALSE	FALSE	FALSE	FALSE	FALSE	76652600	94579000	0.810461096	10054	UBA2
B2RDG1;Q8WVX9;E9PNW8;Q9H600	FAR1	5	5	12.2	11	0	17.138	4082000	9629000	9614400	7411600	10493000	0	3405900	FAR1	2993	4082000	9629000	9614400	7411600	10493000	1340239.147	FALSE	FALSE	FALSE	FALSE	FALSE	TRUE	8246000	1340239.147	6.152633294	84188	FAR1
B2RDK6;D3DR65;O75477;B0QZ43;B4DPN7	SPFH1;ERLIN1	5	3	21.4	14	0	32.981	10544000	11077000	7725000	6611300	9462100	5973600	6900500	SPFH1	2422	10544000	11077000	7725000	6611300	9462100	5973600	FALSE	FALSE	FALSE	FALSE	FALSE	FALSE	9083880	5973600	1.520670952	10613	ERLIN1;SPFH1
Q8N1H4;Q68DZ9;Q59GA1;B2RDQ3;P62995-3;P62995;H7BXF3	DKFZp686F18120;TRA2B	8	6	34.5	38	0	47.096	48272000	49830000	69468000	76912000	58784000	86025000	88378000	DKFZp686F18120	622	48272000	49830000	69468000	76912000	58784000	86025000	FALSE	FALSE	FALSE	FALSE	FALSE	FALSE	60653200	86025000	0.705064807	6434	DKFZp686F18120;TRA2B
B2RDT8;Q9Y5X2;C9J8E6;C9J014;C9J271	SNX8	6	8	18.9	9	0	14.447	0	10709000	9359200	0	11722000	0	5645700	SNX8	2598	3618458.699	10709000	9359200	3403755.895	11722000	1868785.034	TRUE	FALSE	FALSE	TRUE	FALSE	TRUE	7762482.919	1868785.034	4.153759141	29886	SNX8
B4DJ51;B2RDW0;H0Y7A7;P62158;Q9BRL5;E7ETZ0;E7EMB3;A8K1M2;Q96HY3;M0QZ52;G3V361	CALM3;CALM2;CALM1	17	10	60.4	93	0	323.31	320850000	573330000	319760000	285860000	237630000	503450000	780360000	CALM3	73	320850000	573330000	319760000	285860000	237630000	503450000	FALSE	FALSE	FALSE	FALSE	FALSE	FALSE	347486000	503450000	0.690209554	801	CALM1;CALM3;CALM2
Q5RKT7;B2RDW1;P62979;J3QS39;J3QTR3;Q8WYN9;F5H6Q2;F5GYU3;F5H2Z3;F5H265;Q5UGI3;B4DV12;F5H388;F5H747;F5GXK7;J3QKN0;Q5U5U6;Q5PY61;Q9UFQ0;Q96C32;Q96MH4;L8B4I8;L8B196;Q96H31;L8B4R0;A8K674;L8B4Z6;L8B4M0;L8B4J3;Q66K58;Q59EM9;P0CG47;P0CG48;M0R1V7;Q49A90;M0R1M6	RPS27A;HEL112;UBB;UBC;DKFZp434K0435;UbC;UBA52	38	3	51.3	37	0	174.07	53779000	51180000	53118000	54947000	62160000	50438000	144010000	RPS27A	417	53779000	51180000	53118000	54947000	62160000	50438000	FALSE	FALSE	FALSE	FALSE	FALSE	FALSE	55036800	50438000	1.091177287	6233	UBC;UBB;UbC;RPS27A;DKFZp434K0435;UBA52
D3DPU2;B2RDY9;B4DI38;Q01518;B4DNW7;Q01518-2;B4DNA3;B4DNY3;B4DUZ8	CAP1	19	25	64	191	0	309.83	885780000	875100000	375270000	395630000	461480000	544640000	433910000	CAP1	160	885780000	875100000	375270000	395630000	461480000	544640000	FALSE	FALSE	FALSE	FALSE	FALSE	FALSE	598652000	544640000	1.099170094	10487	CAP1
B2RE46;P04844-2;P04844	RPN2	9	17	39.5	148	0	323.31	276380000	300160000	209540000	2.38E+08	261280000	452440000	232300000	RPN2	267	276380000	300160000	209540000	2.38E+08	261280000	452440000	FALSE	FALSE	FALSE	FALSE	FALSE	FALSE	257072000	452440000	0.568190257	6185	RPN2
D5MQE1;B2RE59;Q92600;Q92600-3;Q92600-2	RQCD1	7	6	27.8	10	0	14.88	6810900	6460200	8307100	8550700	7336800	9767800	9903900	RQCD1	2127	6810900	6460200	8307100	8550700	7336800	9767800	FALSE	FALSE	FALSE	FALSE	FALSE	FALSE	7493140	9767800	0.767126682	9125	CNOT9
B2RE76;Q9UQN3;A0A087WW88;C9J0A7;Q9UQN3-2	CHMP2B	8	3	12.7	4	0	5.018	6819100	12311000	0	0	8958900	0	13217000	CHMP2B	1903	6819100	12311000	3661560.921	1604493.533	8958900	2143051.803	FALSE	FALSE	TRUE	TRUE	FALSE	TRUE	6671010.891	2143051.803	3.112855639	25978	CHMP2B
B2RMQ4;Q8WWK9-4;Q8WWK9-6;Q8WWK9-5;Q8WWK9;C9J7Y4	CKAP2	6	2	3.7	3	0	7.4475	1049100	3693500	0	0	0	1607900	650560	CKAP2	3966	1049100	3693500	1449775.93	3250501.563	1491321.758	1607900	FALSE	FALSE	TRUE	TRUE	TRUE	FALSE	2186839.85	1607900	1.360059612	26586	CKAP2
B2RNR6;Q96KR1	ZFR	6	10	13.7	23	0	28.769	14118000	14033000	10804000	14815000	18764000	9598800	5668600	ZFR	2591	14118000	14033000	10804000	14815000	18764000	9598800	FALSE	FALSE	FALSE	FALSE	FALSE	FALSE	14506800	9598800	1.511313914	51663	ZFR
B2RWN5;Q9H583;A0A024R3R7;Q5T3Q7;B4E263;A2VDI1;B7ZAU8	HEATR1	11	24	13.8	68	0	67.007	35574000	41580000	34806000	43989000	52219000	28276000	5515600	HEATR1	2623	35574000	41580000	34806000	43989000	52219000	28276000	FALSE	FALSE	FALSE	FALSE	FALSE	FALSE	41633600	28276000	1.472400622	55127	HEATR1
B2ZZ89;Q01082;D6W5C0;A0A087WUZ3;K9MS24;Q01082-2;Q01082-3	SPTBN1	21	110	56.6	555	0	323.31	429940000	534630000	673520000	846530000	783620000	461630000	75299000	SPTBN1	722	429940000	534630000	673520000	846530000	783620000	461630000	FALSE	FALSE	FALSE	FALSE	FALSE	FALSE	653648000	461630000	1.415956502	6711	SPTBN1
B7Z6D5;B3GQE6;Q96GQ7;Q53G15	DDX27	7	16	22.2	38	0	37.63	24806000	35152000	35728000	42726000	47048000	18763000	12990000	DDX27	1913	24806000	35152000	35728000	42726000	47048000	18763000	FALSE	FALSE	FALSE	FALSE	FALSE	FALSE	37092000	18763000	1.976869371	55661	DDX27
B3KM21;Q5RI15;Q5RI15-2	FAM36A;COX20	3	2	22	7	0	8.9805	14053000	9797800	0	11743000	0	12292000	32787000	FAM36A	1253	14053000	9797800	2695962.535	11743000	1987664.299	12292000	FALSE	FALSE	TRUE	FALSE	TRUE	FALSE	8055485.367	12292000	0.655343749	116228	COX20;FAM36A
Q96CP5;B3KM34;O75439;A8K1E9;G3V0E4;Q9UG64;B3KQ85;B4DM90	PMPCB;DKFZp586I1223	11	12	31.2	49	0	124.64	25914000	41793000	36444000	46957000	37046000	42169000	25961000	PMPCB	1423	25914000	41793000	36444000	46957000	37046000	42169000	FALSE	FALSE	FALSE	FALSE	FALSE	FALSE	37630800	42169000	0.892380659	9512	PMPCB;DKFZp586I1223
B4DWG1;B3KM47;Q9Y6Y8-2;Q9Y6Y8;B3KN10	SEC23IP	8	10	15.3	29	0	20.335	14998000	15681000	11868000	14799000	9704100	12434000	7445200	SEC23IP	2357	14998000	15681000	11868000	14799000	9704100	12434000	FALSE	FALSE	FALSE	FALSE	FALSE	FALSE	13410020	12434000	1.078496059	11196	SEC23IP
B3KM65;Q9Y2R4;A0A087X121;Q59H21	DDX52	4	4	15.7	6	0	12.716	0	5815500	0	5311000	5404200	4943900	2597800	DDX52	3184	1420791.95	5815500	2885250.589	5311000	5404200	4943900	TRUE	FALSE	TRUE	FALSE	FALSE	FALSE	4167348.508	4943900	0.842927346	11056	DDX52
B3KM81;Q59E88;Q53G26;Q96EY1-2;Q96EY1;Q96EY1-3	DNAJA3	7	8	23.6	23	0	34.312	26045000	9624500	5103600	8038700	10747000	13670000	13769000	DNAJA3	1883	26045000	9624500	5103600	8038700	10747000	13670000	FALSE	FALSE	FALSE	FALSE	FALSE	FALSE	11911760	13670000	0.871379663	9093	DNAJA3
B3KM89;O94855;O94855-2;E9PDM8;A8K6V0	SEC24D	9	6	11.3	6	0	16.772	0	4257500	0	0	8978100	14596000	2917900	SEC24D	3109	2076265.772	4257500	2478206.808	1616910.822	8978100	14596000	TRUE	FALSE	TRUE	TRUE	FALSE	FALSE	3881396.681	14596000	0.265921943	9871	SEC24D
B3KNK4;B3KM95;O95674	CDS2	4	5	16.2	5	0	18.342	7987800	19781000	0	0	0	6589500	8680000	CDS2	2230	7987800	19781000	2221193.183	1438251.786	2946187.152	6589500	FALSE	FALSE	TRUE	TRUE	TRUE	FALSE	6874886.424	6589500	1.043309268	8760	CDS2
B3KMA8;K7EIE8;O95983-2;O95983;A0A0A0MTS6	MBD3	7	3	17.5	11	0	10.419	5577900	5106100	4616600	5926200	4904900	3390300	6839700	MBD3	2432	5577900	5106100	4616600	5926200	4904900	3390300	FALSE	FALSE	FALSE	FALSE	FALSE	FALSE	5226340	3390300	1.541556794	53615	MBD3
B3KMC9;Q9H0D6;B4DZC3;Q9H0D6-2;B4E0B9	XRN2	6	18	20.6	47	0	58.903	49548000	60578000	36173000	27644000	30267000	56889000	17643000	XRN2	1693	49548000	60578000	36173000	27644000	30267000	56889000	FALSE	FALSE	FALSE	FALSE	FALSE	FALSE	40842000	56889000	0.717924379	22803	XRN2
C9JP16;Q8NB01;B3KME2;O75718;B3KS71;B3KX16;B3KUP0;B3KQR7	CRTAP	9	9	25.1	33	0	24.288	16009000	19037000	35767000	31319000	36268000	38205000	21257000	CRTAP	1547	16009000	19037000	35767000	31319000	36268000	38205000	FALSE	FALSE	FALSE	FALSE	FALSE	FALSE	27680000	38205000	0.724512498	10491	CRTAP
B3KMG5;Q6IBL8;Q53ET9;O95376;Q59HA2	ARIH2	7	3	9.6	7	0	6.1791	3070800	2970100	3321600	4265600	2974000	2984100	2581100	ARIH2	3193	3070800	2970100	3321600	4265600	2974000	2984100	FALSE	FALSE	FALSE	FALSE	FALSE	FALSE	3320420	2984100	1.112703998	10425	ARIH2
B3KN57;B3KML1;O60749-2;O60749;Q53GG3	SNX2	6	12	31.2	45	0	84.521	44657000	55068000	31666000	31652000	30547000	30512000	27925000	SNX2	1368	44657000	55068000	31666000	31652000	30547000	30512000	FALSE	FALSE	FALSE	FALSE	FALSE	FALSE	38718000	30512000	1.268943367	6643	SNX2
B3KMP6;D3DSW3;O94903;E5RFX7;A8K520;H0YBG2;E5RG77	PROSC	7	5	28.1	11	0	15.395	4592400	6859800	8441200	8604000	6268000	4445100	9887700	PROSC	2129	4592400	6859800	8441200	8604000	6268000	4445100	FALSE	FALSE	FALSE	FALSE	FALSE	FALSE	6953080	4445100	1.564212279	11212	PLPBP;PROSC
B3KMR5;Q5JTH9;Q5JTH9-2;Q5JTH9-3;B3KY97	RRP12	10	24	22.8	63	0	72.237	54847000	47972000	50192000	56395000	40652000	21655000	10361000	RRP12	2089	54847000	47972000	50192000	56395000	40652000	21655000	FALSE	FALSE	FALSE	FALSE	FALSE	FALSE	50011600	21655000	2.309471254	23223	RRP12
B3KMS0;Q15021;B3KY03;B4E0B7	NCAPD2	9	18	17.1	56	0	73.527	32560000	24436000	30934000	33554000	40909000	33556000	6828500	NCAPD2	2434	32560000	24436000	30934000	33554000	40909000	33556000	FALSE	FALSE	FALSE	FALSE	FALSE	FALSE	32478600	33556000	0.967892478	9918	NCAPD2
B3KMV8;O75746;O75746-2	SLC25A12	6	8	21.2	15	0	20.795	14569000	9735500	16007000	14261000	12111000	12292000	5770800	SLC25A12	2573	14569000	9735500	16007000	14261000	12111000	12292000	FALSE	FALSE	FALSE	FALSE	FALSE	FALSE	13336700	12292000	1.084990238	8604	SLC25A12
B3KN28;O95394;O95394-3;O95394-4;A0A087WT27;J3KN95	PGM3	13	8	19.2	17	0	30.459	10506000	16064000	12369000	18753000	11932000	21628000	7791700	PGM3	2315	10506000	16064000	12369000	18753000	11932000	21628000	FALSE	FALSE	FALSE	FALSE	FALSE	FALSE	13924800	21628000	0.64383207	5238	PGM3
B3KN49;O94992	HEXIM1	3	5	16.2	8	0	10.003	6406900	6634800	7566900	6463500	0	6020000	16223000	HEXIM1	1756	6406900	6634800	7566900	6463500	1453049.172	6020000	FALSE	FALSE	FALSE	FALSE	TRUE	FALSE	5705029.834	6020000	0.947679374	10614	HEXIM1
B3KN59;O95816;B3KM36;O95816-2	BAG2	4	9	46.9	29	0	46.377	34816000	20339000	32512000	44136000	47955000	20095000	28621000	BAG2	1347	34816000	20339000	32512000	44136000	47955000	20095000	FALSE	FALSE	FALSE	FALSE	FALSE	FALSE	35951600	20095000	1.789081861	9532	BAG2
B3KNC3;Q9Y3T9;Q9H9J5	NOC2L	6	10	13.8	27	0	21.789	13252000	18733000	27325000	32112000	27816000	11078000	9736400	NOC2L	2144	13252000	18733000	27325000	32112000	27816000	11078000	FALSE	FALSE	FALSE	FALSE	FALSE	FALSE	23847600	11078000	2.152699043	26155	NOC2L
B3KNF6;B4DR61;P61619;B3KQ68;F8W776;Q8TC24;Q9H9S3-2;Q9H9S3-3;Q9H9S3;P61619-3	SEC61A1;SEC61A2	21	6	17.4	36	0	45.518	57200000	55856000	69626000	60581000	63553000	93755000	73972000	SEC61A1	729	57200000	55856000	69626000	60581000	63553000	93755000	FALSE	FALSE	FALSE	FALSE	FALSE	FALSE	61363200	93755000	0.654505893	29927	SEC61A1;SEC61A2
B3KNM8;B4E2X3;C4B4C6;B3KNI0;Q8N6R0-3;Q8N6R0-4;Q8N6R0;Q8N6R0-2;Q8N6R0-1	feat;METTL13	10	3	7	4	0	9.4431	4297600	0	0	2766200	2643400	0	1326400	feat	3642	4297600	2720122.987	2542011.405	2766200	2643400	2528169.017	FALSE	TRUE	TRUE	FALSE	FALSE	TRUE	2993866.878	2528169.017	1.184203611	51603	feat;METTL13
B3KNN7;Q6IBN0;O43242;B4DEB0;Q96N86;B4DV84;Q8N9M2;B4DPM7;O43242-2	PSMD3	11	23	46.6	101	0	323.31	108770000	112600000	132710000	144540000	191400000	129690000	64483000	PSMD3	814	108770000	112600000	132710000	144540000	191400000	129690000	FALSE	FALSE	FALSE	FALSE	FALSE	FALSE	138004000	129690000	1.064106716	5709	PSMD3
B3KNQ2;V9GY93;Q9HC07-2;Q9HC07	TMEM165	5	3	31.8	10	0	12.855	8683300	8597100	0	0	0	14049000	20686000	TMEM165	1574	8683300	8597100	1481581.316	1616188.483	4516304.196	14049000	FALSE	FALSE	TRUE	TRUE	TRUE	FALSE	4978894.799	14049000	0.35439496	55858	TMEM165
B3KNT3;Q9HD15	SRA1	3	5	23.2	13	0	10.277	0	9721400	4406800	5869400	0	4762700	5132500	SRA1	2686	1416147.419	9721400	4406800	5869400	1373895.917	4762700	TRUE	FALSE	FALSE	FALSE	TRUE	FALSE	4557528.667	4762700	0.956921214	10011	SRA1
B3KPR5;Q7Z2Z2-2;Q7Z2Z2	EFTUD1	3	5	6.4	10	0	10.47	0	2625700	3664800	3577700	3609800	2614800	1190400	EFTUD1	3708	2673884.902	2625700	3664800	3577700	3609800	2614800	TRUE	FALSE	FALSE	FALSE	FALSE	FALSE	3230376.98	2614800	1.235420292	79631	EFL1
B3KPX5;Q96I59;Q9H5H1;B2RD66;Q96I59-2	NARS2	8	7	19.9	10	0	17.359	0	0	9910900	20121000	10106000	0	4536900	NARS2	2775	2178163.678	3287976.411	9910900	20121000	10106000	1772559.959	TRUE	TRUE	FALSE	FALSE	FALSE	TRUE	9120808.018	1772559.959	5.145556838	79731	NARS2
B3KPZ0;Q9P2R3;Q9P2R3-2;Q9P2R3-4;Q5H9P4	ANKFY1;DKFZp686M19106	6	9	9.6	15	0	32.253	7763300	6282900	17967000	10543000	8607500	9861100	3367100	ANKFY1	3003	7763300	6282900	17967000	10543000	8607500	9861100	FALSE	FALSE	FALSE	FALSE	FALSE	FALSE	10232740	9861100	1.037687479	51479	ANKFY1;DKFZp686M19106
B3KS18;B4DDX1;B3KQ71;B4DWL6;Q9H4A6;B3KQJ9	GOLPH3	6	2	11.9	11	0	6.0416	28808000	25959000	0	41086000	48651000	24825000	26781000	GOLPH3	1398	28808000	25959000	1659110.498	41086000	48651000	24825000	FALSE	FALSE	TRUE	FALSE	FALSE	FALSE	29232622.1	24825000	1.177547718	64083	GOLPH3
B3KQT9;V9HVY3;P30101;B3KQT2;B4DJ98;B4DDM1	HEL-S-269;PDIA3	6	27	69.6	226	0	323.31	563950000	986580000	855880000	711040000	783650000	927260000	578140000	HEL-S-269	119	563950000	986580000	855880000	711040000	783650000	927260000	FALSE	FALSE	FALSE	FALSE	FALSE	FALSE	780220000	927260000	0.841425274	2923	HEL-S-269;PDIA3
H0Y6T6;B3KQU6;Q8IXM6;B4DP16;Q8IXM6-2	NRM	5	2	8.8	3	0.0052669	2.6759	3065600	3461700	3566700	3184500	3223300	3831100	4573800	NRM	2768	3065600	3461700	3566700	3184500	3223300	3831100	FALSE	FALSE	FALSE	FALSE	FALSE	FALSE	3300360	3831100	0.861465375	11270	NRM
Q8NF19;B3KR70;Q15904;A0A0C4DGX8;B4DWM8	FLJ00383;ATP6AP1	7	5	13.4	10	0	10.641	17118000	8114500	0	0	0	6176900	11432000	FLJ00383	2009	17118000	8114500	1453385.968	1677061.308	2310354.792	6176900	FALSE	FALSE	TRUE	TRUE	TRUE	FALSE	6134660.414	6176900	0.993161685	537	ATP6AP1;FLJ00383
B3KY42;B3KRB2;Q96PZ0;E7EUH7	PUS7	5	7	13.6	7	0	15.002	8883900	8817600	12596000	20926000	16958000	0	4695800	PUS7	2748	8883900	8817600	12596000	20926000	16958000	705728.8973	FALSE	FALSE	FALSE	FALSE	FALSE	TRUE	13636300	705728.8973	19.32229225	54517	PUS7
B4DHR0;B3KRW4;Q9H5N1-2;Q9H5N1	RABEP2	5	3	5.8	2	0.0010157	3.3132	1812400	984860	0	0	0	1187300	691090	RABEP2	3943	1812400	984860	4582589.049	1648201.048	6635923.093	1187300	FALSE	FALSE	TRUE	TRUE	TRUE	FALSE	3132794.638	1187300	2.638587247	79874	RABEP2
Q6IBP2;B3KSE0;P30519;Q6FHB5;Q53HF1;A0A087WT44;P30519-2;I3L159;I3L1F5;I3L276;I3L4P8;I3L463	HMOX2	13	10	42.4	24	0	45.763	19207000	17513000	16347000	20280000	22017000	15338000	16824000	HMOX2	1725	19207000	17513000	16347000	20280000	22017000	15338000	FALSE	FALSE	FALSE	FALSE	FALSE	FALSE	19072800	15338000	1.243499804	3163	HMOX2
B4DMT5;B3KSH1;O00303;B4DEW9	EIF3F	8	10	42.7	58	0	257.1	56431000	63412000	103980000	113410000	114280000	65163000	80347000	EIF3F	683	56431000	63412000	103980000	113410000	114280000	65163000	FALSE	FALSE	FALSE	FALSE	FALSE	FALSE	90302600	65163000	1.38579562	8665	EIF3F
D6RCK3;B3KSH6;Q4W5E0;Q9H8S9-2;Q9H8S9;Q7L9L4;Q7L9L4-2	MOB1B;MOBKL1A;MOB4A;MOB1A	7	2	18.5	18	0	7.7827	9694800	13469000	10551000	13343000	23683000	9072000	47281000	MOB1B	998	9694800	13469000	10551000	13343000	23683000	9072000	FALSE	FALSE	FALSE	FALSE	FALSE	FALSE	14148160	9072000	1.559541446	92597	MOB1B;MOB1A;MOBKL1A
B3KSI3;Q53EW7;M0QXF9;O15382-2;O15382;M0QZP4;M0QZ10	BCAT2	7	4	14.2	10	0	6.3676	4585400	0	9931200	6818400	0	6756400	7902600	BCAT2	2302	4585400	2170218.153	9931200	6818400	3524432.173	6756400	FALSE	TRUE	FALSE	FALSE	TRUE	FALSE	5405930.065	6756400	0.800119896	587	BCAT2
C9J5N1;B3KSP9;Q9BTE6;Q9BTE6-2;Q9BTE6-3;K7EQ85;L7N2F4	PTGES3L-AARSD1;AARSD1	7	3	6.9	9	0	6.4029	2698600	4691000	5489300	8603600	0	2887900	3333700	PTGES3L-AARSD1	3011	2698600	4691000	5489300	8603600	2161512.404	2887900	FALSE	FALSE	FALSE	FALSE	TRUE	FALSE	4728802.481	2887900	1.637453679	100885850	AARSD1;PTGES3L-AARSD1
B3KT11;C9JA08;Q96D46;B3KMN5;B4DKU1	NMD3	9	8	20.9	22	0	47.378	19513000	15093000	18111000	22869000	24605000	14392000	9807600	NMD3	2138	19513000	15093000	18111000	22869000	24605000	14392000	FALSE	FALSE	FALSE	FALSE	FALSE	FALSE	20038200	14392000	1.392315175	51068	NMD3
B3KTJ9;Q8N163;Q8N163-2;H0YB24;G3V119;E2PSM9	CCAR2	13	18	23.5	53	0	63.403	67891000	36572000	53873000	61156000	48267000	71205000	19945000	CCAR2	1603	67891000	36572000	53873000	61156000	48267000	71205000	FALSE	FALSE	FALSE	FALSE	FALSE	FALSE	53551800	71205000	0.752079208	57805	CCAR2
B4DWZ7;B3KTN5;Q9NS86	LANCL2	3	6	19.2	6	0	14.21	7568900	6165500	5624300	0	0	8473200	5821700	LANCL2	2564	7568900	6165500	5624300	3322904.406	1662477.809	8473200	FALSE	FALSE	FALSE	TRUE	TRUE	FALSE	4868816.443	8473200	0.574613658	55915	LANCL2
K7EJE8;K7EKE6;B3KU28;Q2VPA0;B3KXS5;P36776-2;P36776;E5KMI6;B4DPX0;P36776-3	LONP1	15	28	42.9	136	0	227.82	143570000	96117000	113090000	101170000	105930000	191020000	73460000	LONP1	733	143570000	96117000	113090000	101170000	105930000	191020000	FALSE	FALSE	FALSE	FALSE	FALSE	FALSE	111975400	191020000	0.586197257	9361	LONP1
B3KU62;Q597H1;Q53EU7;Q92597;Q8N959;A0A024R9I3;Q92597-3;Q92597-2;B7Z505;B7Z4H0;B3KWB2	TRG14;NDRG1	25	8	38.5	27	0	40.317	0	0	35312000	24235000	33492000	60597000	20546000	TRG14	1577	1832264.957	1937348.169	35312000	24235000	33492000	60597000	TRUE	TRUE	FALSE	FALSE	FALSE	FALSE	19361722.63	60597000	0.319516191	10397	NDRG1
B3KUZ8;A0A024R6W0;P00505;A8K482;P00505-2	GOT2	6	22	63.9	132	0	215.7	201710000	192510000	294940000	292190000	272530000	236710000	202440000	GOT2	301	201710000	192510000	294940000	292190000	272530000	236710000	FALSE	FALSE	FALSE	FALSE	FALSE	FALSE	250776000	236710000	1.059422923	2806	GOT2
B3KVJ8;Q96RY8;P51798-2;P51798;B7Z9L3;B4E3N4;Q2VPA2;B3KUD9;B3KXZ3;Q9BSM4;Q9BRN4;H0Y2M6	CLCN7	14	7	10.7	11	0	13.054	17434000	17974000	14173000	18267000	1.80E+07	12527000	14243000	CLCN7	1856	17434000	17974000	14173000	18267000	1.80E+07	12527000	FALSE	FALSE	FALSE	FALSE	FALSE	FALSE	17169600	12527000	1.370607488	1186	CLCN7
B3KVN0;Q0P512;Q59GX2;P11166;B4DKW1;B4DDR6	SLC2A1	9	7	14.4	24	0	43.463	8623300	16433000	9030000	7796800	8062900	48809000	28530000	SLC2A1	1351	8623300	16433000	9030000	7796800	8062900	48809000	FALSE	FALSE	FALSE	FALSE	FALSE	FALSE	9989200	48809000	0.204658977	6513	SLC2A1
B3KVY9;Q8TB61-5;Q8TB61-4;Q8TB61-3;Q8TB61-2;Q8TB61	SLC35B2	6	3	8	17	0	9.411	25596000	11971000	12320000	11026000	15152000	7231000	17717000	SLC35B2	1688	25596000	11971000	12320000	11026000	15152000	7231000	FALSE	FALSE	FALSE	FALSE	FALSE	FALSE	15213000	7231000	2.103858387	347734	SLC35B2
B3KW34;Q969M3;Q969M3-3;E5RGR9;E5RHH4;Q969M3-2	YIPF5	6	2	8.2	3	0	4.9956	5910800	7041100	6532000	6817300	4774700	18274000	68765000	YIPF5	773	5910800	7041100	6532000	6817300	4774700	18274000	FALSE	FALSE	FALSE	FALSE	FALSE	FALSE	6215180	18274000	0.34011054	81555	YIPF5
X5D2F4;B3KWV6;Q7L576;Q7L576-2;Q7L576-3;B3KWT5	CYFIP1	7	8	17.5	25	0	55.044	10740000	14950000	14248000	13386000	11963000	18534000	4245200	CYFIP1	2833	10740000	14950000	14248000	13386000	11963000	18534000	FALSE	FALSE	FALSE	FALSE	FALSE	FALSE	13057400	18534000	0.704510629	23191	CYFIP1
B3KX11;P49368;Q59H77;P49368-2;B4DUR8;Q2TU64	CCT3	12	31	66.5	202	0	323.31	416540000	518420000	560710000	654070000	589560000	413260000	257350000	CCT3	250	416540000	518420000	560710000	654070000	589560000	413260000	FALSE	FALSE	FALSE	FALSE	FALSE	FALSE	547860000	413260000	1.325702947	7203	CCT3
B3KXN9;Q96SZ5	ADO	2	2	7.4	2	0.0057279	2.6545	1947700	2559100	1755900	0	0	0	1831800	ADO	3430	1947700	2559100	1755900	2497503.627	3089270.512	1086117.536	FALSE	FALSE	FALSE	TRUE	TRUE	TRUE	2369894.828	1086117.536	2.181987445	84890	ADO
E9PD53;B3KXX5;Q9NTJ3;Q9NTJ3-2;B3KVJ5	SMC4	15	31	26.1	78	0	81.345	65742000	52262000	54295000	61440000	72997000	81942000	17190000	SMC4	1714	65742000	52262000	54295000	61440000	72997000	81942000	FALSE	FALSE	FALSE	FALSE	FALSE	FALSE	61347200	81942000	0.74866613	10051	SMC4
B3KXZ4;P49736;H0Y8E6;B7Z8Z6;B4DSV5;Q9BWF4	MCM2	6	29	45.3	131	0	159.69	77855000	63896000	118440000	141130000	135060000	177360000	51409000	MCM2	947	77855000	63896000	118440000	141130000	135060000	177360000	FALSE	FALSE	FALSE	FALSE	FALSE	FALSE	107276200	177360000	0.604850023	4171	MCM2
B3KY60;Q99459;B4DSH1	CDC5L	3	13	20.4	33	0	35.246	21694000	20283000	21117000	19290000	28751000	26157000	11385000	CDC5L	2012.5	21694000	20283000	21117000	19290000	28751000	26157000	FALSE	FALSE	FALSE	FALSE	FALSE	FALSE	22227000	26157000	0.849753412	988	CDC5L
B3LEU8;Q6NUQ4-2;Q6NUQ4;B4DKI3;B2RD07	TMEM214	11	9	15.6	16	0	30.106	10971000	15816000	12561000	17509000	16855000	14524000	6021700	TMEM214	2527	10971000	15816000	12561000	17509000	16855000	14524000	FALSE	FALSE	FALSE	FALSE	FALSE	FALSE	14742400	14524000	1.01503718	54867	TMEM214
E9PID8;B4DUD5;E7EWR4;B3V096;P33240-2;P33240;A0A0A0MT56	CSTF2	7	2	20.1	6	0	16.349	4357000	5383100	6944000	12863000	8366400	8783300	4956800	CSTF2	2710	4357000	5383100	6944000	12863000	8366400	8783300	FALSE	FALSE	FALSE	FALSE	FALSE	FALSE	7582700	8783300	0.863308779	1478	CSTF2
B4DDF4;Q6FHE4;B4DUT8;Q99439;Q6FHC3;A0A087X271;B4DHU5;Q53GK7;B4DN57;Q99439-2;A0A087X1X5;H3BVI6	CNN2	16	10	48.3	47	0	128.75	35349000	27166000	38697000	31688000	41525000	207540000	76287000	CNN2	715	35349000	27166000	38697000	31688000	41525000	207540000	FALSE	FALSE	FALSE	FALSE	FALSE	FALSE	34885000	207540000	0.168088079	1265	CNN2
B4DDH8;Q96N66-3;Q96N66;Q96N66-2	MBOAT7	9	5	15.2	14	0	23.41	10691000	4103600	0	3323100	8713400	10694000	11675000	MBOAT7	1988	10691000	4103600	4424653.14	3323100	8713400	10694000	FALSE	FALSE	TRUE	FALSE	FALSE	FALSE	6251150.628	10694000	0.584547468	79143	MBOAT7
B4DDQ8		1	1	64.9	6	0	5.0765	9581100	0	15787000	16768000	13102000	0	5870100	B4DDQ8	2556	9581100	1372412.596	15787000	16768000	13102000	2250118.258	FALSE	TRUE	FALSE	FALSE	FALSE	TRUE	11322102.52	2250118.258	5.031781099	5236
Q49AG2;B4DDR7;Q9Y3A6;B1AKT3;Q9Y3A6-2	TMED5	5	2	13.4	9	0	26.531	0	0	0	10528000	7888600	7408000	13713000	TMED5	1885	3870811.137	1092516.784	2613389.564	10528000	7888600	7408000	TRUE	TRUE	TRUE	FALSE	FALSE	FALSE	5198663.497	7408000	0.701763431	50999	TMED5
B4DDT6;Q5BJF2;Q86XC5;J3KT68;J3KTD1	TMEM97	5	2	12.1	6	0.0002642	3.8721	20420000	13909000	9580000	0	10325000	6245500	30828000	TMEM97	1287	20420000	13909000	9580000	2114461.797	10325000	6245500	FALSE	FALSE	FALSE	TRUE	FALSE	FALSE	11269692.36	6245500	1.804449981	27346	TMEM97
B4DDX2;Q07666-2;Q07666;B4E043;B2R7B5;Q07666-3	KHDRBS1	8	5	17.7	38	0	223.06	82475000	95078000	152540000	152360000	112750000	1.37E+08	154310000	KHDRBS1	392	82475000	95078000	152540000	152360000	112750000	1.37E+08	FALSE	FALSE	FALSE	FALSE	FALSE	FALSE	119040600	1.37E+08	0.868909489	10657	KHDRBS1
B4DEA3;P54727;Q53F10;B7ZA74;B7Z4W4;P54727-2	RAD23B	9	9	33	48	0	70.275	105650000	105790000	101880000	82484000	115850000	157850000	161330000	RAD23B	374	105650000	105790000	101880000	82484000	115850000	157850000	FALSE	FALSE	FALSE	FALSE	FALSE	FALSE	102330800	157850000	0.648278746	5887	RAD23B
B4DEA8;P49748;P49748-3;Q53HR2;P49748-2;B3KPA6;B3KPX1	ACADVL	17	26	44.7	139	0	155.43	126450000	63249000	163240000	96242000	115930000	144370000	49286000	ACADVL	977	126450000	63249000	163240000	96242000	115930000	144370000	FALSE	FALSE	FALSE	FALSE	FALSE	FALSE	113022200	144370000	0.782864861	37	ACADVL
B4DEI4;B4DNR1;Q9H8Y8;Q9H8Y8-3;Q9H8Y8-2;B4DQF1	GORASP2	14	7	22.7	24	0	25.499	19935000	35292000	13800000	20067000	22750000	22270000	34829000	GORASP2	1218	19935000	35292000	13800000	20067000	22750000	22270000	FALSE	FALSE	FALSE	FALSE	FALSE	FALSE	22368800	22270000	1.004436462	26003	GORASP2
B4DEP6;E7EX17;B4DRM3;P23588;P23588-2;Q7Z5Y0	EIF4B	13	19	31.3	70	0	255.48	193740000	106720000	127720000	121810000	136760000	73070000	87274000	EIF4B	629	193740000	106720000	127720000	121810000	136760000	73070000	FALSE	FALSE	FALSE	FALSE	FALSE	FALSE	137350000	73070000	1.879704393	1975	EIF4B
B4DEX5;F6QUN3;H0Y4B0;B4DN03;O43414-3;O43414-2;O43414;F6UGJ8	PRNPIP;ERI3	8	2	14.4	4	0.0017539	3.1634	0	2228900	2837800	3269700	4214200	2305000	3774000	PRNPIP	2929	2283052.907	2228900	2837800	3269700	4214200	2305000	TRUE	FALSE	FALSE	FALSE	FALSE	FALSE	2966730.581	2305000	1.287084851	79033	ERI3;PRNPIP
B4DF17;Q8NI22-2;Q8NI22-3;Q8NI22	MCFD2	4	1	13.4	6	0	7.8534	6940800	9152000	0	0	0	7814300	16038000	MCFD2	1768	6940800	9152000	1381416.329	1529680.009	2394886.106	7814300	FALSE	FALSE	TRUE	TRUE	TRUE	FALSE	4279756.489	7814300	0.547682644	90411	MCFD2
B4DF80;Q9H6R4-4;Q9H6R4;A0A0A0MRW6;Q9H6R4-2;B3KPN5;Q9H6R4-3	NOL6	8	6	6.9	15	0	14.961	4107400	4494400	4425500	4606500	5328000	2894900	1874100	NOL6	3408	4107400	4494400	4425500	4606500	5328000	2894900	FALSE	FALSE	FALSE	FALSE	FALSE	FALSE	4592360	2894900	1.586362223	65083	NOL6
B4DFR2;Q9NP97;B1AKR6;A0A140VJH9;Q8TF09	DYNLRB1;DYNLRB2	10	4	47.9	12	0	24.472	0	23792000	17528000	22523000	23823000	25520000	50973000	DYNLRB1	949	3176469.688	23792000	17528000	22523000	23823000	25520000	TRUE	FALSE	FALSE	FALSE	FALSE	FALSE	18168493.94	25520000	0.711931581	83658	DYNLRB1;DYNLRB2
B4DFV7;Q9Y4R8;H3BRS3;B4DXS2	TELO2	5	5	8.5	5	0	8.0232	8070100	0	1876400	2169900	2147900	0	1298100	TELO2	3657	8070100	1442638.215	1876400	2169900	2147900	1905925.053	FALSE	TRUE	FALSE	FALSE	FALSE	TRUE	3141387.643	1905925.053	1.648222022	9894	TELO2
Q7RTQ9;Q7RTQ7;G5E9S8;G3V2E7;F8W6L3;B4DGB3;Q7RTQ8;Q7RTQ2;G3V3H3;Q7RTQ1;Q7RTQ0;G3V5R9;Q7RTP8;E7EVH7;Q07866-8;Q07866-2;Q07866-3;Q07866;Q07866-7;Q07866-5;Q07866-10;Q07866-6;Q07866-4;Q07866-9;B5BU63;Q7RTQ4;B4DS14;Q7Z5D5	KNS2;KLC1	34	14	45.2	39	0	76.32	28593000	43997000	28497000	28531000	21507000	38046000	15462000	KNS2	1797	28593000	43997000	28497000	28531000	21507000	38046000	FALSE	FALSE	FALSE	FALSE	FALSE	FALSE	30225000	38046000	0.794433055	3831	KLC1;KNS2
F5H669;B4DGF8;Q8N684-2;Q8N684;Q8N684-3;J3QT54;F5H6M0;F5H047	CPSF7	17	6	16.8	14	0	13.449	6686000	5965200	10895000	7850900	0	8304700	7730900	CPSF7	2323	6686000	5965200	10895000	7850900	2050999.849	8304700	FALSE	FALSE	FALSE	FALSE	TRUE	FALSE	6689619.97	8304700	0.805522171	79869	CPSF7
B4DH07;Q5JRX3;Q5JRX3-2;B4DRW8;Q5JRX3-3;B3KN37;A0A0A0MRX9;B3KM51	PITRM1	14	29	33.7	91	0	90.496	144660000	102360000	86765000	55150000	65623000	95502000	31486000	PITRM1	1276	144660000	102360000	86765000	55150000	65623000	95502000	FALSE	FALSE	FALSE	FALSE	FALSE	FALSE	90911600	95502000	0.951933991	10531	PITRM1
B4DHE8;Q96DH6-2;Q96DH6;J3QKT5;J3KTC1	MSI2	7	4	16.4	10	0	19.939	0	11388000	9735600	8344700	9485000	0	12492000	MSI2	1945	2896184.114	11388000	9735600	8344700	9485000	1255594.446	TRUE	FALSE	FALSE	FALSE	FALSE	TRUE	8369896.823	1255594.446	6.666083023	124540	MSI2
C9J2Y9;B4DHJ3;P30876;C9J4M6;B4DH29;B4DR40	POLR2B	7	20	22.5	38	0	42.474	17902000	11520000	25655000	23906000	26944000	22956000	5914500	POLR2B	2548	17902000	11520000	25655000	23906000	26944000	22956000	FALSE	FALSE	FALSE	FALSE	FALSE	FALSE	21185400	22956000	0.922869838	5431	POLR2B
B4DHW9;Q9NVE7;Q7RTX2;H0YA26;B4DZX1;A0A0G2JR38;E9PHT6	PANK4	7	2	3.2	7	0	7.3116	4040300	2409300	0	2616300	0	1954500	1045700	PANK4	3753	4040300	2409300	2332865.257	2616300	2758514.259	1954500	FALSE	FALSE	TRUE	FALSE	TRUE	FALSE	2831455.903	1954500	1.448685548	55229	PANK4
B4DIH2;Q8TB36-2;Q8TB36	GDAP1	3	3	18.1	8	0	6.3117	0	0	10373000	9597200	9023000	12336000	9680800	GDAP1	2150	1481019.974	3513902.048	10373000	9597200	9023000	12336000	TRUE	TRUE	FALSE	FALSE	FALSE	FALSE	6797624.404	12336000	0.551039592	54332	GDAP1
B4DII5;B4DWX3;O60684;Q5TFJ7;O15131	KPNA6;KPNA5	8	3	17.4	13	0	8.1203	4634800	5655600	3496700	2661500	4982400	4480900	4303000	KPNA6	2825	4634800	5655600	3496700	2661500	4982400	4480900	FALSE	FALSE	FALSE	FALSE	FALSE	FALSE	4286200	4480900	0.956548908	23633	KPNA5;KPNA6
B4DIZ2;P61086;D6RDM7;P61086-2;B3KSH4;P61086-3	UBE2K;HIP2	7	8	61.2	45	0	27.794	40308000	49273000	32032000	37266000	32308000	63700000	91287000	UBE2K	606	40308000	49273000	32032000	37266000	32308000	63700000	FALSE	FALSE	FALSE	FALSE	FALSE	FALSE	38237400	63700000	0.600273155	3093	HIP2;UBE2K
V9HWJ0;B4DJ30;Q14697;F5H6X6;B4DSM6;A0A024R592;B4DIW2	HEL-S-164nA;GANAB	8	1	46.9	5	0	12.261	0	0	14078000	9993200	13262000	49707000	4758300	HEL-S-164nA	2737	1587111.492	2850670.591	14078000	9993200	13262000	49707000	TRUE	TRUE	FALSE	FALSE	FALSE	FALSE	8354196.416	49707000	0.168068812	23193	GANAB
B4DJB4;P50213;Q53GF8;H0YL72;B4DSY4;P50213-2;B7Z9J8;H0YMU3;H0YLI6	IDH3A	13	16	58.2	83	0	84.125	82566000	127630000	134470000	91400000	1.18E+08	78965000	134290000	IDH3A	448	82566000	127630000	134470000	91400000	1.18E+08	78965000	FALSE	FALSE	FALSE	FALSE	FALSE	FALSE	110813200	78965000	1.403320458	3419	IDH3A
B4DJI2;P28799;K7EKL3;K7EQ05;B4E1G5;P28799-3;P28799-2;K7EQI0	GRN	10	6	13.8	18	0	17.533	13903000	22993000	16620000	10868000	11197000	17668000	14061000	GRN	1863	13903000	22993000	16620000	10868000	11197000	17668000	FALSE	FALSE	FALSE	FALSE	FALSE	FALSE	15116200	17668000	0.855569391	2896	GRN
B4DJK9;Q6FHZ7;Q99541;B4DNH6	ADFP;PLIN2	7	11	43.8	17	0	31.963	6918600	11878000	11356000	9996300	7211500	14849000	6649900	ADFP	2448	6918600	11878000	11356000	9996300	7211500	14849000	FALSE	FALSE	FALSE	FALSE	FALSE	FALSE	9472080	14849000	0.637893461	123	ADFP;PLIN2
B4DJQ8;P53634;H0YCY8	CTSC	8	10	26.5	36	0	43.074	31295000	26759000	55021000	54684000	38414000	22156000	32464000	CTSC	1261	31295000	26759000	55021000	54684000	38414000	22156000	FALSE	FALSE	FALSE	FALSE	FALSE	FALSE	41234600	22156000	1.861103087	1075	CTSC
B4DJR3;P78346;P78346-2;Q5VU11;Q5VU10	RPP30	5	4	25	6	0	7.2593	0	2801000	3582100	3661000	0	3743800	3628900	RPP30	2953	2110683.9	2801000	3582100	3661000	1953411.842	3743800	TRUE	FALSE	FALSE	FALSE	TRUE	FALSE	2821639.148	3743800	0.753683196	10556	RPP30
B4DRA5;B4DJW8;Q15437;Q5QPE2	SEC23B	6	4	12.5	6	0	50.836	12267000	6508000	0	0	3506000	5363600	3057300	SEC23B	3079	12267000	6508000	4450860.85	1576193.814	3506000	5363600	FALSE	FALSE	TRUE	TRUE	FALSE	FALSE	5661610.933	5363600	1.055561737	10483	SEC23B
B4DXV1;B4DPB7;B4DKA4;Q9H9T3-4;Q9H9T3-5;Q9H9T3-2;Q9H9T3	ELP3	7	2	5.5	7	0	5.255	0	0	2536300	2732900	1938600	0	904020	ELP3	3834	1271982.971	1853643.532	2536300	2732900	1938600	1818342.061	TRUE	TRUE	FALSE	FALSE	FALSE	TRUE	2066685.301	1818342.061	1.136576745	55140	ELP3
H0Y9G6;E7ETU7;B4DKM0;P09001;D6RC14;B4DW56;E9PF06	MRPL3	8	4	11.8	9	0	8.8955	8197600	6760300	9007900	8467900	6742400	5989600	8236700	MRPL3	2275	8197600	6760300	9007900	8467900	6742400	5989600	FALSE	FALSE	FALSE	FALSE	FALSE	FALSE	7835220	5989600	1.308137438	11222	MRPL3
B4DKQ5;O60784;B4DJ44;O60784-3;O60784-4;O60784-2;B3KUF5	TOM1	13	6	16.8	8	0	24.902	24019000	9727000	6213800	6939400	5438100	0	11509000	TOM1	2005	24019000	9727000	6213800	6939400	5438100	1328479.548	FALSE	FALSE	FALSE	FALSE	FALSE	TRUE	10467460	1328479.548	7.879278245	10043	TOM1
F5GYL3;B4E300;B4DKV2;G3V529;Q9GZR7-2;Q9GZR7;Q7Z4W0;A0A087WXU8;Q7Z4X3;B4DM03;B4DGI6;Q59FS7	DDX24	12	5	10	10	0	14.343	6831200	10846000	0	0	0	7320900	3868300	DDX24	2908	6831200	10846000	1907700.199	1751255.054	7509056.772	7320900	FALSE	FALSE	TRUE	TRUE	TRUE	FALSE	5769042.405	7320900	0.788023659	57062	DDX24
B4DZ22;B4DL07;P28288;P28288-2	ABCD3	5	9	18.8	16	0	37.209	8730700	8662400	10282000	8091200	8521900	6772600	6397900	ABCD3	2477	8730700	8662400	10282000	8091200	8521900	6772600	FALSE	FALSE	FALSE	FALSE	FALSE	FALSE	8857640	6772600	1.30786404	5825	ABCD3
B4DL66;Q9H832;D3DTW2;Q9H832-2	UBE2Z	8	7	23.7	22	0	13.692	15686000	14313000	19674000	15881000	17193000	13795000	18061000	UBE2Z	1677	15686000	14313000	19674000	15881000	17193000	13795000	FALSE	FALSE	FALSE	FALSE	FALSE	FALSE	16549400	13795000	1.199666546	65264	UBE2Z
B4DL80;G5EA36;P30260;P30260-2;I0EZ68;I3L328;I3L394	CDC27	7	2	2.6	4	0.0041484	2.8782	3107300	0	0	2736400	4952500	0	1375300	CDC27	3623	3107300	1695624.022	3283235.955	2736400	4952500	2135485.506	FALSE	TRUE	TRUE	FALSE	FALSE	TRUE	3155011.995	2135485.506	1.477421405	996	CDC27
B4DLG2;O75152;E9PQ61	ZC3H11A	7	5	9.7	10	0	10.21	6028400	2437300	3677700	0	3353700	2901700	1567200	ZC3H11A	3539	6028400	2437300	3677700	1508264.989	3353700	2901700	FALSE	FALSE	FALSE	TRUE	FALSE	FALSE	3401072.998	2901700	1.172096701	9877	ZC3H11A
B4DLN1;B4E1E9		7	6	39.8	28	0	72.472	74405000	55401000	34797000	37972000	42474000	36361000	46487000	B4DLN1	1021	74405000	55401000	34797000	37972000	42474000	36361000	FALSE	FALSE	FALSE	FALSE	FALSE	FALSE	49009800	36361000	1.34786722	NA
B4DLS1;P49903-3;P49903;P49903-2;P49903-4	SEPHS1	7	3	11.6	13	0	8.4174	6599900	6635900	6695400	5830200	3916600	7831900	12706000	SEPHS1	1932.5	6599900	6635900	6695400	5830200	3916600	7831900	FALSE	FALSE	FALSE	FALSE	FALSE	FALSE	5935600	7831900	0.757874845	22929	SEPHS1
Q6IAT1;B4DLV7;P50395;P50395-2;Q5SX87	GDI2	11	10	77.1	70	0	323.31	138260000	141440000	147660000	130870000	140930000	159030000	86226000	GDI2	639	138260000	141440000	147660000	130870000	140930000	159030000	FALSE	FALSE	FALSE	FALSE	FALSE	FALSE	139832000	159030000	0.879280639	2665	GDI2
F5GZ28;B4DM52;P18858-3;P18858;M0R0Q7;Q59HG7;P18858-2;B4DUE1	LIG1	9	7	10.5	13	0	14.977	12798000	5458200	9785300	0	7226500	12696000	3838200	LIG1	2916	12798000	5458200	9785300	2005694.019	7226500	12696000	FALSE	FALSE	FALSE	TRUE	FALSE	FALSE	7454738.804	12696000	0.587172244	3978	LIG1
M0R117;B4DM74;Q02543;M0R3D6;M0R1A7;Q53HD3;B2R4C0;B4DM94;B4DUV3;Q32XH3;M0R0P7	RPL18A	12	12	57.8	81	0	90.753	307790000	303380000	255320000	313770000	281440000	227610000	571100000	RPL18A	121	307790000	303380000	255320000	313770000	281440000	227610000	FALSE	FALSE	FALSE	FALSE	FALSE	FALSE	292340000	227610000	1.284389965	6142	RPL18A
B4DM76;Q96GG9;C9JVE2;C9JRU6;C9J0B2;C9JUW4;C9J8R4	DCUN1D1	8	4	21.5	12	0	9.0391	4526500	10932000	8589400	9982300	9015800	9274600	13543000	DCUN1D1	1891	4526500	10932000	8589400	9982300	9015800	9274600	FALSE	FALSE	FALSE	FALSE	FALSE	FALSE	8609200	9274600	0.928255666	54165	DCUN1D1
B4DMF5;E9KL48;P00367;B4DMG8;Q53GW3;B4E0N9;P00367-3;B3KT18;A0A140VK14;P00367-2;P49448	GLUD1;GLUD2	15	22	51.9	113	0	104.02	140250000	161460000	215120000	164530000	111010000	188130000	96010000	GLUD1	586	140250000	161460000	215120000	164530000	111010000	188130000	FALSE	FALSE	FALSE	FALSE	FALSE	FALSE	158474000	188130000	0.842364323	2746	GLUD1;GLUD2
B4DMM4;Q15276;K7ENJ9	RABEP1	5	4	6	5	0	8.6784	0	0	11924000	0	14143000	17375000	2588400	RABEP1	3190	2651497.293	1699920.108	11924000	2963692.599	14143000	17375000	TRUE	TRUE	FALSE	TRUE	FALSE	FALSE	6676422	17375000	0.384254504	9135	RABEP1
B7Z705;B4DN31;Q9BWS9-3;Q9BWS9;A0A024RCB5;Q9BWS9-2	CHID1	15	5	12.8	15	0	9.3785	8457600	12839000	22352000	16636000	15970000	10403000	12465000	CHID1	1947	8457600	12839000	22352000	16636000	15970000	10403000	FALSE	FALSE	FALSE	FALSE	FALSE	FALSE	15250920	10403000	1.466011727	66005	CHID1
B4DN85;Q96J02-3;Q96J02-2;Q96J02;Q59ER4	ITCH	16	2	3.3	5	0.0002635	3.8235	2004500	3207500	2687900	2370300	0	3643800	1108400	ITCH	3731	2004500	3207500	2687900	2370300	4940883.884	3643800	FALSE	FALSE	FALSE	FALSE	TRUE	FALSE	3042216.777	3643800	0.834902239	83737	ITCH
B4DVK1;B4DND9;Q7L4X7;Q96CS0;Q53YP0;B4E1N4;Q9NZM5;B4E013;M0QZ34	GLTSCR2	13	4	20.5	5	0	6.8387	3884100	3683000	0	6247800	0	0	3630500	GLTSCR2	2952	3884100	3683000	1542609.674	6247800	3360916.477	1010160.245	FALSE	FALSE	TRUE	FALSE	TRUE	TRUE	3743685.23	1010160.245	3.706031046	29997	NOP53;GLTSCR2
C9J0J7;G5E9Q6;B4DNH1;D3DNI2;P35080-2;D3DNI3	PFN2	7	2	34.1	13	0	27.584	9471700	9511500	0	0	0	25677000	35289000	PFN2	1207	9471700	9511500	3134777.626	1469859.121	3266865.472	25677000	FALSE	FALSE	TRUE	TRUE	TRUE	FALSE	5370940.444	25677000	0.209173207	NA	PFN2
B4DNJ7;Q6ZNB1;P20839;P20839-3;P20839-7;P20839-5;P20839-6;C9J381;B3KRZ3;Q5H9Q6;P20839-2;P20839-4;A0A024R725;C9K0R9	IMPDH;IMPDH1;DKFZp781N0678	17	9	27.4	22	0	53.94	12459000	21727000	23754000	29182000	26509000	11009000	9275000	IMPDH	2179	12459000	21727000	23754000	29182000	26509000	11009000	FALSE	FALSE	FALSE	FALSE	FALSE	FALSE	22726200	11009000	2.064329185	3614	IMPDH1;IMPDH
B4DNR3;F8W9U3;V9HW87;Q96IU4;B4DQI4	ABHD14B;HEL-S-299	7	7	43.2	36	0	33.361	74261000	47280000	67820000	78316000	59059000	38258000	84855000	ABHD14B	651	74261000	47280000	67820000	78316000	59059000	38258000	FALSE	FALSE	FALSE	FALSE	FALSE	FALSE	65347200	38258000	1.708066287	84836	ABHD14B;HEL-S-299
B4DPZ5;B4DNU9;Q6NZI2;B3KRY5;Q6NZI2-2;Q6NZI2-3	PTRF	6	13	34.7	58	0	248.06	0	0	117390000	83138000	109320000	517470000	135320000	PTRF	446	1192291.791	3142886.818	117390000	83138000	109320000	517470000	TRUE	TRUE	FALSE	FALSE	FALSE	FALSE	62836635.72	517470000	0.12143049	284119	CAVIN1
V9HWA0;B4DNW0;Q03154;Q03154-4;C9JMV9;Q03154-2;Q03154-3;B4DPC3;C9JYZ0	HEL-S-5;ACY1;ABHD14A-ACY1	11	10	31.9	38	0	31.49	65792000	33095000	33851000	49994000	27123000	28211000	35517000	HEL-S-5	1199	65792000	33095000	33851000	49994000	27123000	28211000	FALSE	FALSE	FALSE	FALSE	FALSE	FALSE	41971000	28211000	1.487753004	95	ACY1;HEL-S-5
B4DP27;Q6FHT8;Q15363;F5GX39;B4E020;E7EQ72	RNP24;TMED2	6	6	38.5	21	0	42.137	111450000	66367000	8372200	21935000	7373600	10074000	108430000	RNP24	531	111450000	66367000	8372200	21935000	7373600	10074000	FALSE	FALSE	FALSE	FALSE	FALSE	FALSE	43099560	10074000	4.278296605	10959	TMED2;RNP24
B4DP80;Q8NCW5-2;Q8NCW5	APOA1BP	6	9	42.3	49	0	44.414	146210000	83587000	38209000	36582000	25683000	25948000	89660000	APOA1BP	614	146210000	83587000	38209000	36582000	25683000	25948000	FALSE	FALSE	FALSE	FALSE	FALSE	FALSE	66054200	25948000	2.545637429	128240	APOA1BP;NAXE
B4DP97;D3DVW9;P78324-4;P78324;P78324-2;Q5TFQ8	PTPNS1;SIRPA;SIRPB1	17	8	25.2	12	0	19.5	10803000	17689000	9354000	0	0	17214000	9207900	PTPNS1	2186	10803000	17689000	9354000	4527848.955	1908739.067	17214000	FALSE	FALSE	FALSE	TRUE	TRUE	FALSE	8856517.604	17214000	0.514495039	140885	PTPNS1;SIRPA;SIRPB1
F5GYN4;J3KR44;B4DPD5;Q96FW1;Q659F9;F5H6Q1;F5GYJ8;F5H3F0;B3KUV5;Q96FW1-2	OTUB1;DKFZp564E242	11	10	51.5	67	0	186.47	101930000	87845000	41964000	50680000	52899000	79348000	112790000	OTUB1	509	101930000	87845000	41964000	50680000	52899000	79348000	FALSE	FALSE	FALSE	FALSE	FALSE	FALSE	67063600	79348000	0.845183243	55611	OTUB1
B4DPK2;Q9NVH1-3;Q9NVH1;B4DGD5;Q9NVH1-2;B1AK20	DNAJC11	9	10	24.8	25	0	36.629	19790000	14195000	25953000	30115000	16055000	16802000	12210000	DNAJC11	1960	19790000	14195000	25953000	30115000	16055000	16802000	FALSE	FALSE	FALSE	FALSE	FALSE	FALSE	21221600	16802000	1.263040114	55735	DNAJC11
B4DQX8;Q9UKG1	APPL1	4	5	10.6	7	0	16.127	6948700	8777100	7108700	7556300	9166700	6335900	4049800	APPL1	2875	6948700	8777100	7108700	7556300	9166700	6335900	FALSE	FALSE	FALSE	FALSE	FALSE	FALSE	7911500	6335900	1.248678167	26060	APPL1
B4DR80;Q6P0Y1;Q5U0E6;B4DT57;Q9Y6E0-2;Q9Y6E0;Q6FG81;H0Y630;B4DMR0;Q5JV98	STK24;HEL-S-95	28	6	28.6	18	0	39.325	0	7653800	4392200	7284300	6379100	5702900	4269700	STK24	2829	4163600.872	7653800	4392200	7284300	6379100	5702900	TRUE	FALSE	FALSE	FALSE	FALSE	FALSE	5974600.174	5702900	1.047642458	8428	STK24
B4DR82;Q92542-2;Q92542;H0Y6T7;B4DJN0	NCSTN	7	3	5.1	7	0	6.5166	6022500	3735500	3000200	0	0	2370800	2722700	NCSTN	3151	6022500	3735500	3000200	1390404.642	3517129.755	2370800	FALSE	FALSE	FALSE	TRUE	TRUE	FALSE	3533146.879	2370800	1.490276227	23385	NCSTN
B4DRA0;Q14498-3;Q14498-2;Q14498;B4DLM0;B3KWX7;Q68DD9;B4E1M7;B7Z4L7;Q6N037;E1P5S2;Q7Z3L0;Q6MZY7;G3XAC6;A0A0U1RQH7;H0Y4X3	RBM39;DKFZp781C0423;DKFZp686A11192;RNPC2;DKFZp781I1140;DKFZp686C17209	36	13	32.5	51	0	130.66	57443000	51487000	41136000	35486000	38861000	44342000	37458000	RBM39	1164	57443000	51487000	41136000	35486000	38861000	44342000	FALSE	FALSE	FALSE	FALSE	FALSE	FALSE	44882600	44342000	1.012191602	9584	RBM39;DKFZp686A11192;DKFZp781I1140;RNPC2
Q7Z503;B7ZAF6;B4DRV2;E5KS60;E5KS55;Q6N0B1;Q9P2R7-2;Q9P2R7;B4DY87;B7Z9S6;A0A0S2Z511;Q9Y4T0;Q5T9Q5	SUCLA2;DKFZp686D0880;DKFZp564P2062	17	8	23.8	35	0	27.788	20455000	37891000	20918000	26899000	22155000	27738000	21150000	SUCLA2	1553	20455000	37891000	20918000	26899000	22155000	27738000	FALSE	FALSE	FALSE	FALSE	FALSE	FALSE	25663600	27738000	0.925214507	8803	SUCLA2;DKFZp686D0880
H7C0X4;B4DS50;C9J7S5;Q92685-2;Q92685	ALG3	5	2	6.2	5	0	4.7697	0	3893400	3924800	5280600	0	3834100	4763900	ALG3	2735	1667832.827	3893400	3924800	5280600	2074171.636	3834100	TRUE	FALSE	FALSE	FALSE	TRUE	FALSE	3368160.893	3834100	0.878474973	10195	ALG3
B4DST3;B7ZLW8;Q99707;Q99707-2;Q6MZH4;B1ANE3	MTR;DKFZp686A22123	6	4	4.9	6	0	6.8609	0	0	4718700	4250600	4015300	3097800	632950	MTR	3978	4259368.879	1808927.397	4718700	4250600	4015300	3097800	TRUE	TRUE	FALSE	FALSE	FALSE	FALSE	3810579.255	3097800	1.230092083	4548	MTR
B4DSY1;Q9NPK3;Q96BC0;O76046;Q15477;B4E0N1;B4DM01;Q59F56;A0A024RCU1	SKIV2L;SKI2W	14	9	13.6	11	0	20.105	15135000	12796000	6086000	6016400	5566200	5224300	3457900	SKIV2L	2982	15135000	12796000	6086000	6016400	5566200	5224300	FALSE	FALSE	FALSE	FALSE	FALSE	FALSE	9119920	5224300	1.745673105	6499	SKIV2L;SKI2W
H3BPK3;B4DT01;Q16775-2;Q16775;H3BPQ4	HAGH	7	6	30.5	17	0	19.953	21761000	17618000	8233600	6330800	0	10202000	30345000	HAGH	1299	21761000	17618000	8233600	6330800	1564294.601	10202000	FALSE	FALSE	FALSE	FALSE	TRUE	FALSE	11101538.92	10202000	1.088172801	3029	HAGH
E9PF16;B4DTB9;Q96CM8-3;Q96CM8;Q96CM8-2;Q96CM8-4	ACSF2	7	8	17.7	16	0	27.584	0	24848000	15887000	22297000	9023900	13905000	8564100	ACSF2	2242	1732328.569	24848000	15887000	22297000	9023900	13905000	TRUE	FALSE	FALSE	FALSE	FALSE	FALSE	14757645.71	13905000	1.061319361	80221	ACSF2
B4DTP3;H0YM23;O75179-6;O75179-7;O75179-2;O75179;O75179-3;B4DR08;Q8TEF1;E9PDP5;O75179-5;O75179-4;Q8IWZ3;Q8IWZ3-4;Q8IWZ3-6	ANKRD17;FLJ00246;ANKHD1	24	7	7.8	11	0	21.661	6156900	4425500	5219700	4859000	6441200	4273700	2054600	ANKRD17	3352	6156900	4425500	5219700	4859000	6441200	4273700	FALSE	FALSE	FALSE	FALSE	FALSE	FALSE	5420460	4273700	1.268329551	26057	ANKRD17;ANKHD1
B4E336;B4DTS6;P48960-2;P48960-3;P48960;B3KUI0	CD97	6	9	17.3	14	0	51.549	0	0	10002000	9838300	14034000	50123000	7090300	CD97	2396	1361524.775	3516855.461	10002000	9838300	14034000	50123000	TRUE	TRUE	FALSE	FALSE	FALSE	FALSE	7750536.047	50123000	0.15463033	976	CD97
D3DVL7;B4DU42;Q969Z0;B3KRS4;B3KMT3;B3KM73;Q969Z0-2;C9IZN7	TBRG4	13	14	31.5	38	0	33.965	52815000	29731000	59189000	46126000	44040000	17079000	20814000	TBRG4	1564	52815000	29731000	59189000	46126000	44040000	17079000	FALSE	FALSE	FALSE	FALSE	FALSE	FALSE	46380200	17079000	2.715627379	9238	TBRG4
E7ER68;B4DUD8;Q658Y4	FAM91A1	5	7	10.1	14	0	17.957	13004000	9148600	0	0	0	11328000	4839200	FAM91A1	2724	13004000	9148600	1554600.35	2328545.427	5388945.742	11328000	FALSE	FALSE	TRUE	TRUE	TRUE	FALSE	6284938.304	11328000	0.554814469	157769	FAM91A1
B4DUF8;Q9Y385	UBE2J1	2	3	13.9	8	0	11.965	2062000	2491600	0	2337900	0	0	1661500	UBE2J1	3500	2062000	2491600	1382119.721	2337900	1618125.046	2257416.014	FALSE	FALSE	TRUE	FALSE	TRUE	TRUE	1978348.953	2257416.014	0.876377655	51465	UBE2J1
B4DUS0;Q9P287-4;Q9P287-3;Q9P287;Q9P287-2;B4E318	BCCIP	6	3	13.4	13	0	9.4564	9598600	8806100	12736000	13987000	15217000	12240000	11713000	BCCIP	1984	9598600	8806100	12736000	13987000	15217000	12240000	FALSE	FALSE	FALSE	FALSE	FALSE	FALSE	12068940	12240000	0.98602451	56647	BCCIP
B4DV28;Q96KP4;A0A024R382;Q96KP4-2;J3QKT2;B4DPF1	CNDP2	23	19	51.6	94	0	146.26	159880000	118690000	147930000	151710000	111220000	51807000	77808000	CNDP2	700	159880000	118690000	147930000	151710000	111220000	51807000	FALSE	FALSE	FALSE	FALSE	FALSE	FALSE	137886000	51807000	2.661532225	55748	CNDP2
Q9BVJ8;B4DVA7;H3BS10;A0A0S2Z3W3;H3BP20;P06865;B4DVL8;Q6PJ76;A0A0S2Z3L7	HEXA	23	13	34	54	0	45.441	20301000	127470000	103380000	72235000	63773000	38113000	61314000	HEXA	839	20301000	127470000	103380000	72235000	63773000	38113000	FALSE	FALSE	FALSE	FALSE	FALSE	FALSE	77431800	38113000	2.031637499	3073	HEXA
B4DVJ0		1	1	54.8	22	0	323.31	118100000	72694000	71620000	99711000	98649000	69028000	67678000	B4DVJ0	787	118100000	72694000	71620000	99711000	98649000	69028000	FALSE	FALSE	FALSE	FALSE	FALSE	FALSE	92154800	69028000	1.335035058	NA
B4DVK6;Q5T447;B3KU34;A1A4G1;Q5T447-2	HECTD3	5	2	3.9	4	0	7.1575	0	1961700	5004400	0	3086700	0	678900	HECTD3	3952	2091519.858	1961700	5004400	6632713.712	3086700	2141389.2	TRUE	FALSE	FALSE	TRUE	FALSE	TRUE	3755406.714	2141389.2	1.753724504	79654	HECTD3
H7C0E5;B4DVT8;O75312;H7BZM7	ZPR1	4	7	21	23	0	20.156	9300400	12315000	8786200	13635000	13645000	9298900	10105000	ZPR1	2110	9300400	12315000	8786200	13635000	13645000	9298900	FALSE	FALSE	FALSE	FALSE	FALSE	FALSE	11536320	9298900	1.240611255	8882	ZPR1
B4DW13;Q6YP21-3;Q6YP21;A0A0A0MRN6;A0A0A0MRN7	hCG_23341;CCBL2	6	8	19.8	10	0	20.067	4172000	55636000	5889200	5924600	3720300	8283200	11680000	hCG_23341	1987	4172000	55636000	5889200	5924600	3720300	8283200	FALSE	FALSE	FALSE	FALSE	FALSE	FALSE	15068420	8283200	1.819154433	56267	KYAT3
B4DW31;F8W6G1;Q9UHY1	NRBP1	4	4	10.9	15	0	25.106	10331000	13130000	8521800	11273000	11893000	13108000	13296000	NRBP1	1901	10331000	13130000	8521800	11273000	11893000	13108000	FALSE	FALSE	FALSE	FALSE	FALSE	FALSE	11029760	13108000	0.841452548	29959	NRBP1
B7ZAX5;B4DW43;Q01415-2;Q01415;B3KUV8;H0YLL3;H0YLL8	GALK2	8	4	9.7	7	0	7.4186	0	4714700	12081000	8171300	11664000	3430500	4068600	GALK2	2868.5	2093403.838	4714700	12081000	8171300	11664000	3430500	TRUE	FALSE	FALSE	FALSE	FALSE	FALSE	7744880.768	3430500	2.257653627	2585	GALK2
B4DWB1;Q8WUV3;O60678;B4DP44;A0A0A0MSN7;O60678-2	PRMT3	6	7	16.4	12	0	12.978	0	6633200	6489100	9529300	7807400	5243300	3134500	PRMT3	3065	1004013.821	6633200	6489100	9529300	7807400	5243300	TRUE	FALSE	FALSE	FALSE	FALSE	FALSE	6292602.764	5243300	1.200122588	10196	PRMT3
B4DWS6;Q53GQ0;B3KQJ0;D3DR22	HSD17B12	6	11	40.1	36	0	94.182	64514000	13050000	56995000	81856000	44205000	12871000	47785000	HSD17B12	992	64514000	13050000	56995000	81856000	44205000	12871000	FALSE	FALSE	FALSE	FALSE	FALSE	FALSE	52124000	12871000	4.049724186	51144	HSD17B12
C9JPE1;B4DWZ5;O43772	SLC25A20	3	4	13.2	8	0	7.31	6277100	5333300	5746800	7128000	0	6422800	6442900	SLC25A20	2472	6277100	5333300	5746800	7128000	2123008.624	6422800	FALSE	FALSE	FALSE	FALSE	TRUE	FALSE	5321641.725	6422800	0.828554793	788	SLC25A20
B4DX69;Q99757;M0QXH0;F8WDN2	TXN2	4	2	18.3	12	0	22.743	18540000	10856000	15053000	15171000	17136000	10769000	26842000	TXN2	1393	18540000	10856000	15053000	15171000	17136000	10769000	FALSE	FALSE	FALSE	FALSE	FALSE	FALSE	15351200	10769000	1.425499118	25828	TXN2
B4DXI4;Q7Z2W9;A0A024R5G7;F5H7V8;H3BUY0;Q7Z2W9-2	MRPL21	6	3	14.6	6	0	6.3807	2499400	2574900	0	5389700	0	0	3791300	MRPL21	2921	2499400	2574900	1553902.817	5389700	1850786.958	1972375.254	FALSE	FALSE	TRUE	FALSE	TRUE	TRUE	2773737.955	1972375.254	1.406293224	219927	MRPL21
B4DY09;Q53FG3;F4ZW62;Q12905;F4ZW63	ILF2	7	17	61.4	122	0	142.62	173500000	227150000	240320000	237960000	229110000	281910000	219810000	ILF2	284	173500000	227150000	240320000	237960000	229110000	281910000	FALSE	FALSE	FALSE	FALSE	FALSE	FALSE	221608000	281910000	0.786094853	3608	ILF2
B4DY28;P21291;Q9BTA4;Q6ZMS3;B4E2T4;E9PND2;E9PS42;Q59EQ5;E9PP21;Q6AI18;B3KVC9	CSRP1;DKFZp686M148	12	11	66.3	84	0	161.14	134470000	318450000	95150000	92151000	200570000	71304000	265300000	CSRP1	245	134470000	318450000	95150000	92151000	200570000	71304000	FALSE	FALSE	FALSE	FALSE	FALSE	FALSE	168158200	71304000	2.358327724	1465	CSRP1;DKFZp686M148;HEL-S-286
Q6PKB2;B4DYE2;Q59HG1;O95239-2;O95239;Q2VIQ3	KIF4A;KIF4B	21	4	5.2	5	0	4.9149	2888600	2734700	0	0	4336100	3153000	1033400	KIF4A	3761	2888600	2734700	1612689.913	3540362.926	4336100	3153000	FALSE	FALSE	TRUE	TRUE	FALSE	FALSE	3022490.568	3153000	0.958607855	24137	KIF4A;KIF4B
B4DYP5;Q3ZTS7;Q8IZ07;H0YIN8;B4DDL0	ANKRD13;ANKRD13A	15	3	6.1	3	0	5.0928	0	1547200	1516900	0	0	7127500	1322900	ANKRD13	3643.5	3255630.321	1547200	1516900	2179676.303	1605640.322	7127500	TRUE	FALSE	FALSE	TRUE	TRUE	FALSE	2021009.389	7127500	0.283550949	88455	ANKRD13A;ANKRD13
B4DYP7;Q96CW5-2;Q96CW5	TUBGCP3	8	6	7.8	6	0	10.325	2483500	6978500	5681100	3602100	5151000	3303600	1749800	TUBGCP3	3466	2483500	6978500	5681100	3602100	5151000	3303600	FALSE	FALSE	FALSE	FALSE	FALSE	FALSE	4779240	3303600	1.446676353	10426	TUBGCP3
B4DYY5;F8W726;Q14157-4;Q14157-1;Q14157-3;Q14157;Q14157-5;B4DZJ6;Q5VU77	UBAP2L	15	20	30.3	86	0	125.6	112570000	138980000	61585000	54439000	86830000	76545000	65397000	UBAP2L	805	112570000	138980000	61585000	54439000	86830000	76545000	FALSE	FALSE	FALSE	FALSE	FALSE	FALSE	90880800	76545000	1.18728591	9898	UBAP2L
B7ZAX9;B4DZC0;O60264	SMARCA5	5	18	28.9	49	0	96.346	35750000	30024000	26956000	26426000	33264000	27150000	9701700	SMARCA5	2149	35750000	30024000	26956000	26426000	33264000	27150000	FALSE	FALSE	FALSE	FALSE	FALSE	FALSE	30484000	27150000	1.122799263	8467	SMARCA5
B4DZF1;Q9UHD9;B4DM19	UBQLN2	3	3	18.8	9	0	13.087	4116100	4456000	3799900	4345500	0	3984000	4392700	UBQLN2	2804	4116100	4456000	3799900	4345500	3111007.124	3984000	FALSE	FALSE	FALSE	FALSE	TRUE	FALSE	3965701.425	3984000	0.995406984	29978	UBQLN2
B4E0Q4;B4DZJ7;O00267-2;O00267;B4DJK4	SUPT5H	5	8	9.3	17	0	18.565	10928000	11365000	8798700	10155000	6807500	9759200	3688500	SUPT5H	2944	10928000	11365000	8798700	10155000	6807500	9759200	FALSE	FALSE	FALSE	FALSE	FALSE	FALSE	9610840	9759200	0.984797934	6829	SUPT5H
B4E074;Q9NVX2;B4E303;A0A0A0MRH0;K7EN33	NLE1	7	8	24.7	16	0	21.804	13279000	7505200	15491000	17357000	18749000	4239900	6375900	NLE1	2482	13279000	7505200	15491000	17357000	18749000	4239900	FALSE	FALSE	FALSE	FALSE	FALSE	FALSE	14476240	4239900	3.414288073	54475	NLE1
B4E0B1;Q08AF3;B4E128;Q08AF3-2	SLFN5	10	9	12	12	0	15.396	5164000	10943000	6989000	5239400	6004800	3242000	2228900	SLFN5	3291	5164000	10943000	6989000	5239400	6004800	3242000	FALSE	FALSE	FALSE	FALSE	FALSE	FALSE	6868040	3242000	2.118457742	162394	SLFN5
B4E0K0;Q5JRG1;H7BYF2;Q9BVL2-2;Q9BVL2-3;Q9BVL2;B3KW23	NUPL1	7	4	14.5	20	0	39.136	7577500	10685000	10235000	12895000	12473000	11698000	13364000	NUPL1	1897	7577500	10685000	10235000	12895000	12473000	11698000	FALSE	FALSE	FALSE	FALSE	FALSE	FALSE	10773100	11698000	0.920935203	9818	NUP58
F6VRR5;B4E0L0;Q9BY77;Q96DI9;Q9BY77-2;F8WCX5;Q8WUT1;Q659C6	POLDIP3;DKFZp434G0310	12	7	21.9	16	0	26.839	11931000	17538000	10679000	12692000	16005000	10163000	9501700	POLDIP3	2163	11931000	17538000	10679000	12692000	16005000	10163000	FALSE	FALSE	FALSE	FALSE	FALSE	FALSE	13769000	10163000	1.354816491	84271	POLDIP3
B4E0N6;Q969X5-2;Q969X5	ERGIC1	3	6	31.5	19	0	22.504	17734000	17087000	18768000	24232000	20853000	12794000	20396000	ERGIC1	1583	17734000	17087000	18768000	24232000	20853000	12794000	FALSE	FALSE	FALSE	FALSE	FALSE	FALSE	19734800	12794000	1.542504299	57222	ERGIC1
B4E0X1;P61769;H0YLF3;A6XMH5;F5H6I0;A6XND9;A6XMH4	B2M	7	3	34.4	41	0	26.474	35515000	133540000	90160000	60430000	92637000	216140000	262560000	B2M	247	35515000	133540000	90160000	60430000	92637000	216140000	FALSE	FALSE	FALSE	FALSE	FALSE	FALSE	82456400	216140000	0.381495327	567	B2M
B4E0X8;E9PEB5;Q96AE4;Q96AE4-2;B4DWL1;B4DT31;Q59FU3;Q6PJY1	FUBP1	11	19	39.3	88	0	163.04	134030000	129560000	45990000	89123000	75183000	95346000	69682000	FUBP1	766	134030000	129560000	45990000	89123000	75183000	95346000	FALSE	FALSE	FALSE	FALSE	FALSE	FALSE	94777200	95346000	0.994034359	8880	FUBP1
B4E205;O95486;O95486-2	SEC24A	3	4	5.6	7	0	9.4868	4171400	4362600	3740700	2939600	4932800	3734200	1930100	SEC24A	3385	4171400	4362600	3740700	2939600	4932800	3734200	FALSE	FALSE	FALSE	FALSE	FALSE	FALSE	4029420	3734200	1.079058433	10802	SEC24A
B4E206;Q8WUM0;B4E3T7;A0A024R3R6	NUP133	4	16	17.1	41	0	55.013	16817000	11111000	23070000	22659000	19679000	20861000	5129500	NUP133	2687	16817000	11111000	23070000	22659000	19679000	20861000	FALSE	FALSE	FALSE	FALSE	FALSE	FALSE	18667200	20861000	0.894837256	55746	NUP133
B4E2I4;E1CEI4;Q14TF0;P48506	GCLC	5	3	4.5	5	0	4.9173	3054700	3192700	2276100	3567000	0	3628500	1844200	GCLC	3423	3054700	3192700	2276100	3567000	1254667.41	3628500	FALSE	FALSE	FALSE	FALSE	TRUE	FALSE	2669033.482	3628500	0.735574888	2729	GCLC
B4E2J1;Q8NBU5;Q8NBU5-2	ATAD1	3	5	24.2	11	0	24.855	5726500	8479600	4405100	0	4859800	4449400	8778300	ATAD1	2217	5726500	8479600	4405100	1679924.599	4859800	4449400	FALSE	FALSE	FALSE	TRUE	FALSE	FALSE	5030184.92	4449400	1.130531065	84896	ATAD1
B4E2S7;P13473-2;P13473;P13473-3;B7Z2R9	LAMP2	7	5	12.4	40	0	70.045	51521000	130330000	61786000	53152000	54516000	68518000	100660000	LAMP2	570	51521000	130330000	61786000	53152000	54516000	68518000	FALSE	FALSE	FALSE	FALSE	FALSE	FALSE	70261000	68518000	1.025438571	3920	LAMP2
B4E312;Q92804-2;Q92804;A0A075B7D9	TAF15	6	5	23.5	14	0	12.003	41186000	47602000	15517000	8736900	12245000	4562800	19807000	TAF15	1607	41186000	47602000	15517000	8736900	12245000	4562800	FALSE	FALSE	FALSE	FALSE	FALSE	FALSE	25057380	4562800	5.491667397	8148	TAF15
B4E324;X6R5C5;Q59EV6;X6R8A1;P10619-2;P10619	CTSA;PPGB	9	7	16	43	0	61.175	78544000	1.40E+08	58067000	40407000	40256000	61928000	76508000	CTSA	711	78544000	1.40E+08	58067000	40407000	40256000	61928000	FALSE	FALSE	FALSE	FALSE	FALSE	FALSE	71454800	61928000	1.153836714	5476	CTSA;PPGB
B4E3I9;Q8N516;Q4LE38;O95163;F5H2T0;B3KXE7;Q68DI5	IKBKAP;IKBKAP variant protein;DKFZp781H1425	7	6	6.6	10	0	14.131	8376700	4482700	5761700	0	5730700	3668000	1742200	IKBKAP	3467	8376700	4482700	5761700	3106463.321	5730700	3668000	FALSE	FALSE	FALSE	TRUE	FALSE	FALSE	5491652.664	3668000	1.497179025	8518	ELP1;IKBKAP;IKBKAP variant protein
B5BTZ6;P40763-3;P40763-2;P40763;G8JLH9;B7ZA24;B4DVR6;B4DNP0	STAT3	9	15	27.6	40	0	59.579	31955000	36404000	45477000	26249000	32288000	36969000	15072000	STAT3	1813	31955000	36404000	45477000	26249000	32288000	36969000	FALSE	FALSE	FALSE	FALSE	FALSE	FALSE	34474600	36969000	0.932527253	6774	STAT3
B7Z7C0;Q86XZ2;Q58EX4;B7Z5X1;Q562F2;B5BTZ7;Q59EK0;Q16537-3;Q16537-2;Q16537	PPP2R5E	13	2	10	8	0	5.6014	2274400	0	4268500	4573500	3962200	4556900	2658700	PPP2R5E	3169	2274400	2699586.212	4268500	4573500	3962200	4556900	FALSE	TRUE	FALSE	FALSE	FALSE	FALSE	3555637.242	4556900	0.78027546	5529	PPP2R5E
B5BU83;P16949;Q96CE4;A0A140VJW2;P16949-2;A2A2D0;Q59G27	STMN1	32	9	65.1	56	0	59.208	112820000	107810000	61526000	78306000	65498000	105490000	192080000	STMN1	317	112820000	107810000	61526000	78306000	65498000	105490000	FALSE	FALSE	FALSE	FALSE	FALSE	FALSE	85192000	105490000	0.807583657	3925	STMN1
B5BUB1;Q9Y265;Q9Y265-2;E7ETR0;B3KRS7	RUVBL1	8	17	47.8	108	0	269.64	163270000	117210000	152260000	157490000	129850000	233720000	142470000	RUVBL1	422	163270000	117210000	152260000	157490000	129850000	233720000	FALSE	FALSE	FALSE	FALSE	FALSE	FALSE	144016000	233720000	0.616190313	8607	RUVBL1
B5BUB5;P05455;E7ERC4	SSB	10	22	49.3	107	0	110.32	210470000	207230000	158800000	184700000	188010000	161260000	157240000	SSB	384	210470000	207230000	158800000	184700000	188010000	161260000	FALSE	FALSE	FALSE	FALSE	FALSE	FALSE	189842000	161260000	1.177241721	6741	SSB
B5BUD2;P35250;Q75MT5;P35250-2;A0A087WVY3;H7C5P4	RFC2	12	8	26.6	20	0	26.278	21097000	15127000	12977000	17961000	23532000	20602000	12712000	RFC2	1930	21097000	15127000	12977000	17961000	23532000	20602000	FALSE	FALSE	FALSE	FALSE	FALSE	FALSE	18138800	20602000	0.880438792	5982	RFC2
B5BUI8;P51452;P51452-2;K7ES89	DUSP3	5	9	61.6	32	0	47.399	33983000	29729000	30097000	27250000	28386000	17033000	50014000	DUSP3	961	33983000	29729000	30097000	27250000	28386000	17033000	FALSE	FALSE	FALSE	FALSE	FALSE	FALSE	29889000	17033000	1.754770152	1845	DUSP3
B5MDE0;Q96AA3	RFT1	3	5	8.2	9	0	6.5509	9032200	12962000	10157000	10336000	0	22838000	10635000	RFT1	2063	9032200	12962000	10157000	10336000	2204465.681	22838000	FALSE	FALSE	FALSE	FALSE	TRUE	FALSE	8938333.136	22838000	0.391379855	91869	RFT1
B5MDF5;P62826;J3KQE5;F5H018;H0YFC6	RAN	8	12	45.5	127	0	198.51	627280000	536240000	809020000	889240000	911630000	636610000	1204800000	RAN	33	627280000	536240000	809020000	889240000	911630000	636610000	FALSE	FALSE	FALSE	FALSE	FALSE	FALSE	754682000	636610000	1.185469911	5901	RAN
B7SBB1;G9I2H4;D0EKE4;C8CK04;C0JXB8;D0EKE5;A5JGZ4;O00170;D5LTB3;D0EKE6;C8CK05;C8CHN4;C0JXB9;D2CVN5;E9PMH2	AIP	30	13	50.5	46	0	52.838	44861000	41461000	39629000	30719000	32920000	24089000	33629000	AIP	1236	44861000	41461000	39629000	30719000	32920000	24089000	FALSE	FALSE	FALSE	FALSE	FALSE	FALSE	37918000	24089000	1.574079455	9049	AIP
B7WP74;Q9HCG8	CWC22	2	2	2.6	4	0	4.4747	1749600	1880300	1407200	0	1215300	1740600	703980	CWC22	3935	1749600	1880300	1407200	2413057.901	1215300	1740600	FALSE	FALSE	FALSE	TRUE	FALSE	FALSE	1733091.58	1740600	0.995686304	57703	CWC22
B7Z284;B9ZVN9;B7ZKR9;O95602;Q53T12;B7Z8X7	POLR1A	8	3	2.7	5	0	4.9977	0	3245900	0	0	3826700	3458000	688480	POLR1A	3945	1277900.451	3245900	1584817.331	2069091.831	3826700	3458000	TRUE	FALSE	TRUE	TRUE	FALSE	FALSE	2400881.923	3458000	0.694297838	25885	POLR1A
B7Z2A7;B7Z9D0;Q8NCM9;B7Z2R7;Q5T8D3-4;Q5T8D3-2;Q5T8D3-3;Q5T8D3	KIAA1996;ACBD5	8	3	9.2	3	0	7.1614	6072700	2814300	0	0	0	1576500	3071400	KIAA1996	3076	6072700	2814300	3204910.943	2776346.334	1883258.82	1576500	FALSE	FALSE	TRUE	TRUE	TRUE	FALSE	3350303.219	1576500	2.125152692	91452	ACBD5;KIAA1996
F5H039;B7Z2B5;Q9NQX3;Q9NQX3-2;H0YJ30;B7Z374;B7Z4J7;B2RDJ7;G3V582	GPHN	9	4	6	9	0	14.09	5231300	9882900	6019200	5086400	3683400	3373300	2463200	GPHN	3227	5231300	9882900	6019200	5086400	3683400	3373300	FALSE	FALSE	FALSE	FALSE	FALSE	FALSE	5980640	3373300	1.772934515	10243	GPHN
B7Z321;Q6NX51;Q96A65;B7Z689;B3KTF7;B7Z502	EXOC4	9	8	12.7	15	0	20.397	11082000	10199000	10537000	8833100	7720900	9650900	3774100	EXOC4	2928	11082000	10199000	10537000	8833100	7720900	9650900	FALSE	FALSE	FALSE	FALSE	FALSE	FALSE	9674400	9650900	1.002435006	60412	EXOC4
B7Z3U1;Q6PCB7;Q96DY3;Q6PCB7-2	SLC27A1	6	4	11.1	4	0	7.7746	0	0	9012100	9414600	12617000	0	1571100	SLC27A1	3535	2390210.097	3583563.049	9012100	9414600	12617000	1931944.537	TRUE	TRUE	FALSE	FALSE	FALSE	TRUE	7403494.629	1931944.537	3.83214657	376497	SLC27A1
Q584P1;B7Z3Y2;B7Z8A2;Q9UHG3-2;Q9UHG3;C9K055;F8W8W4	PCYOX1	9	7	18.6	17	0	12.192	13370000	14809000	14287000	12298000	12794000	13023000	9440900	PCYOX1	2166	13370000	14809000	14287000	12298000	12794000	13023000	FALSE	FALSE	FALSE	FALSE	FALSE	FALSE	13511600	13023000	1.037518237	51449	PCYOX1
B7Z410;Q86X76-2;Q86X76-4;Q86X76;Q86X76-3;B2R8D1	NIT1	7	6	22.4	12	0	13.301	9275000	7614800	8716800	0	0	8387100	8773000	NIT1	2219	9275000	7614800	8716800	1971401.28	1328382.387	8387100	FALSE	FALSE	FALSE	TRUE	TRUE	FALSE	5781276.733	8387100	0.689305807	4817	NIT1
B7Z425;Q12846-2;Q12846	STX4A;STX4	4	3	17.8	7	0	6.973	5480400	0	7108900	0	5893600	7835700	7914600	STX4A	2300	5480400	1395723.571	7108900	7498107.123	5893600	7835700	FALSE	TRUE	FALSE	TRUE	FALSE	FALSE	5475346.139	7835700	0.698769241	6810	STX4;STX4A
Q6FI30;B7Z4T6;P08651-4;P08651-5;P08651-3;P08651-6;P08651-2;P08651	NFIC	48	3	10.6	7	0	8.614	5725700	0	0	0	13603000	10117000	4711500	NFIC	2746	5725700	2046356.55	2405819.101	4950002.849	13603000	10117000	FALSE	TRUE	TRUE	TRUE	FALSE	FALSE	5746175.7	10117000	0.567972294	4782	NFIC
B7Z4V2;V9HW84;P38646;Q8N1C8;B7Z4T3;B7Z1V7	HEL-S-124m;HSPA9	12	39	60.9	358	0	323.31	1543800000	1030300000	879280000	724470000	1.02E+09	1709300000	651830000	HEL-S-124m	105	1543800000	1030300000	879280000	724470000	1.02E+09	1709300000	FALSE	FALSE	FALSE	FALSE	FALSE	FALSE	1040170000	1709300000	0.608535658	3313	HSPA9;HEL-S-124m
B7Z4W6;Q99447-4;Q99447;Q99447-3;B3KSC8;Q99447-2;I3L3V9;I3L1L9;I3L1R7;I3L2Q1	PCYT2	11	8	24.6	10	0	22.933	6694800	12327000	5512100	5973700	0	5647300	8238700	PCYT2	2273.5	6694800	12327000	5512100	5973700	2336304.252	5647300	FALSE	FALSE	FALSE	FALSE	TRUE	FALSE	6568780.85	5647300	1.163171932	5833	PCYT2
B7Z4Z4;O75381-2;O75381;K7EK59	PEX14	4	2	7	7	0	4.7353	4111000	4113300	3765200	3973600	3252100	3649300	5987800	PEX14	2531	4111000	4113300	3765200	3973600	3252100	3649300	FALSE	FALSE	FALSE	FALSE	FALSE	FALSE	3843040	3649300	1.053089634	5195	PEX14
J3QQY2;B7Z591;J9JIE6;Q9UM00-2;Q9UM00;J3KS45	TMCO1	6	2	22.1	12	0	13.502	19959000	0	15873000	16558000	15292000	33398000	59632000	TMCO1	854	19959000	1391121.467	15873000	16558000	15292000	33398000	FALSE	TRUE	FALSE	FALSE	FALSE	FALSE	13814624.29	33398000	0.413636274	54499	TMCO1
B7Z5I6;J3KMX1;Q99567;B4DP20	NUP88	5	5	12.7	18	0	16.796	4549900	4179700	7192000	8386800	7593900	8620500	4206000	NUP88	2839	4549900	4179700	7192000	8386800	7593900	8620500	FALSE	FALSE	FALSE	FALSE	FALSE	FALSE	6380460	8620500	0.740149643	4927	NUP88
I3L0N3;B7Z5J7;P46459;B7Z9U2;B4DH19;B4DSK5;P46459-2;B4DGR3	NSF	13	15	24	44	0	69.32	48858000	60134000	48478000	40972000	44239000	49844000	19769000	NSF	1610	48858000	60134000	48478000	40972000	44239000	49844000	FALSE	FALSE	FALSE	FALSE	FALSE	FALSE	48536200	49844000	0.973762138	4905	NSF
B7Z5L6;Q8IXQ6-3;Q8IXQ6-2;Q8IXQ6;Q59ER9	PARP9	8	5	7.9	7	0	10.349	0	0	13117000	8764400	5205000	5346900	1353700	PARP9	3633	2559658.798	2641157.153	13117000	8764400	5205000	5346900	TRUE	TRUE	FALSE	FALSE	FALSE	FALSE	6457443.19	5346900	1.207698515	83666	PARP9
B7Z5P7;O60711;O60711-2	LPXN	5	7	23.5	8	0	18.639	0	39606000	4907800	6957400	5526700	2958900	12656000	LPXN	1936	2195415.979	39606000	4907800	6957400	5526700	2958900	TRUE	FALSE	FALSE	FALSE	FALSE	FALSE	11838663.2	2958900	4.001035248	9404	LPXN
B7Z5S1;Q9NTI5-2;Q9NTI5	PDS5B	6	11	14.1	14	0	26.684	17267000	58647000	18092000	35885000	28236000	45828000	6146300	PDS5B	2509	17267000	58647000	18092000	35885000	28236000	45828000	FALSE	FALSE	FALSE	FALSE	FALSE	FALSE	31625400	45828000	0.690089029	23047	PDS5B
B7Z5V0;Q53FI7;B7Z9A1;Q13642-1;Q13642-5;Q13642-4;B7Z4B7;Q5JXI8;B7Z5T3;B7Z6U8;Q13642;B3KRI9;Q5JXH8;Q5JXH7;Q5JXI3;A0A0D9SFZ9;Q5JXI2;Q13642-3	FHL1	27	8	41.8	17	0	21.887	7858700	0	8796600	7197300	10110000	31477000	9015100	FHL1	2195	7858700	2147679.171	8796600	7197300	10110000	31477000	FALSE	TRUE	FALSE	FALSE	FALSE	FALSE	7222055.834	31477000	0.229439141	2273	FHL1
B7Z6I3;P49916-3;P49916;P49916-4;P49916-2	LIG3	9	5	7.2	12	0	11.628	8790100	13944000	10034000	12091000	6065600	2374300	2657600	LIG3	3172	8790100	13944000	10034000	12091000	6065600	2374300	FALSE	FALSE	FALSE	FALSE	FALSE	FALSE	10184940	2374300	4.28966011	3980	LIG3
Q53H18;Q53G40;B7Z6Q5;P16278-3;P16278;E7EQ29;B7Z5H9;P16278-2	GLB1	10	10	18.8	40	0	82.489	33550000	34560000	62173000	44319000	36946000	58119000	30395000	GLB1	1297	33550000	34560000	62173000	44319000	36946000	58119000	FALSE	FALSE	FALSE	FALSE	FALSE	FALSE	42309600	58119000	0.727982243	2720	GLB1
B7Z792;O75306-2;O75306;Q53HG2;B7Z9L2	NDUFS2	6	10	28.6	41	0	95.242	42555000	39384000	51816000	51634000	28189000	26990000	37377000	NDUFS2	1166	42555000	39384000	51816000	51634000	28189000	26990000	FALSE	FALSE	FALSE	FALSE	FALSE	FALSE	42715600	26990000	1.582645424	4720	NDUFS2
B7Z7A4;O14530-2;O14530;F8WCJ3;B8ZZX4;F8WBV5;G3XAJ4	TXNDC9	7	5	26	10	0	10.189	11870000	11100000	0	0	0	10099000	14927000	TXNDC9	1821	11870000	11100000	2035359.305	3377374.056	2002425.441	10099000	FALSE	FALSE	TRUE	TRUE	TRUE	FALSE	6077031.76	10099000	0.601745892	10190	TXNDC9
Q308M8;B7Z7F3;Q9H6Z4-3;Q9H6Z4-2;Q9H6Z4;B7Z5P4;Q53GE1;K7EIJ4	RANBP3	15	9	23.1	13	0	25.577	12286000	13400000	0	0	0	16755000	8686200	RANBP3	2229	12286000	13400000	1470375.161	3283597.906	1868868.158	16755000	FALSE	FALSE	TRUE	TRUE	TRUE	FALSE	6461768.245	16755000	0.385662086	8498	RANBP3
B7Z7F5;B7Z829;B7ZLA9;Q9C0E8-3;Q9C0E8-2;Q9C0E8;Q9C0E8-4	KIAA1715;LNP	7	3	12.2	10	0	6.9647	6066900	0	4468100	0	8217800	13379000	6493600	KIAA1715	2465	6066900	1803912.891	4468100	1926668.823	8217800	13379000	FALSE	TRUE	FALSE	TRUE	FALSE	FALSE	4496676.343	13379000	0.336099585	80856	KIAA1715;LNP
E9PH64;B7Z7N1;E7EWZ0;E9PF49;Q9Y6M9	NDUFB9	7	5	32.7	6	0	72.6	7586000	6396300	9489900	7136800	7351000	6823200	18819000	NDUFB9	1655	7586000	6396300	9489900	7136800	7351000	6823200	FALSE	FALSE	FALSE	FALSE	FALSE	FALSE	7592000	6823200	1.112674405	4715	NDUFB9
B7Z8G2;Q53GX4;Q2TA84;Q13451;B7Z7Z8	FKBP5	7	7	19.5	8	0	14.188	0	0	8334500	8375700	8050700	21886000	4362000	FKBP5	2811	1965711.391	3835724.784	8334500	8375700	8050700	21886000	TRUE	TRUE	FALSE	FALSE	FALSE	FALSE	6112467.235	21886000	0.279286632	2289	FKBP5
B7Z992;P06396-2;B7Z2X4;A0A0A0MS51;B7Z9A0;B7Z6N2;A0A0A0MT01;P06396-4;P06396-3;P06396;B7Z4U6	GSN	26	15	49.7	101	0	323.31	79719000	504650000	469840000	452630000	269380000	181160000	147560000	GSN	408	79719000	504650000	469840000	452630000	269380000	181160000	FALSE	FALSE	FALSE	FALSE	FALSE	FALSE	355243800	181160000	1.960939501	2934	GSN
B7Z9F3;O75431-2;O75431;C9JNK6;B3KM74;C9JAZ1	MTX2	6	7	33.6	22	0	23.267	17119000	20009000	9857300	12829000	8826300	19671000	23869000	MTX2	1473	17119000	20009000	9857300	12829000	8826300	19671000	FALSE	FALSE	FALSE	FALSE	FALSE	FALSE	13728120	19671000	0.697886228	10651	MTX2
Q8IW76;B7ZKK7;P19525;P19525-2;Q05CP4	EIF2AK2	8	12	28.1	51	0	59.669	28007000	28202000	34588000	34630000	27922000	74747000	33004000	EIF2AK2	1246	28007000	28202000	34588000	34630000	27922000	74747000	FALSE	FALSE	FALSE	FALSE	FALSE	FALSE	30669800	74747000	0.410314795	5610	EIF2AK2
H0YNH8;B7ZKM6;Q9BZF9-2;Q9BZF9;F5H2B9;B7ZKM7;Q8NDD7;H0YN48;Q05DB3	UACA;DKFZp564M063	9	4	3.3	4	0	5.2478	0	3006200	3575100	0	0	2423200	600980	UACA	3994	2252476.575	3006200	3575100	3533085.329	3663548.404	2423200	TRUE	FALSE	FALSE	TRUE	TRUE	FALSE	3206082.062	2423200	1.323077774	55075	UACA
B7ZKS3;Q86UV5;Q86UV5-8;B7ZKR8;Q86UV5-2;A0A0A0MRS6;Q86UV5-5	USP48	11	5	7.1	5	0	10.747	5066800	3847900	3532700	4448500	0	0	826860	USP48	3866	5066800	3847900	3532700	4448500	3023661.938	2149987.667	FALSE	FALSE	FALSE	FALSE	TRUE	TRUE	3983912.388	2149987.667	1.852993135	84196	USP48
B7ZLC9;Q8TEQ6;Q58EZ8	GEMIN5	3	14	10.9	21	0	33.533	19680000	16640000	18423000	21648000	23186000	15085000	3688700	GEMIN5	2943	19680000	16640000	18423000	21648000	23186000	15085000	FALSE	FALSE	FALSE	FALSE	FALSE	FALSE	19915400	15085000	1.320212131	25929	GEMIN5
B7ZLW0;Q93052;B7Z871;A0A087WZF1;B7Z8W0	LPP	16	9	24.5	26	0	28.182	22953000	23329000	21089000	17932000	20015000	36171000	20754000	LPP	1570	22953000	23329000	21089000	17932000	20015000	36171000	FALSE	FALSE	FALSE	FALSE	FALSE	FALSE	21063600	36171000	0.582333914	4026	LPP
B7ZM24;Q53ZR1;P55011-3;P55011;G3XAL9	SLC12A2	5	4	4.7	6	0	11.28	0	5566100	0	0	2067600	1506300	1017600	SLC12A2	3769	1306200.959	5566100	1515283.751	2092282.511	2067600	1506300	TRUE	FALSE	TRUE	TRUE	FALSE	FALSE	2509493.444	1506300	1.665998436	6558	SLC12A2
B7ZMF2;Q9NVI1;Q9NVI1-2;Q9NVI1-1;F8W7R3;B3KNW8;H3BP78	FANCI	12	16	15.7	25	0	54.298	13167000	8694900	22144000	20868000	29906000	6770500	2646000	FANCI	3174	13167000	8694900	22144000	20868000	29906000	6770500	FALSE	FALSE	FALSE	FALSE	FALSE	FALSE	18955980	6770500	2.799790267	55215	FANCI
H7C173;H7C202;B8ZZ87;Q6P582;Q6NZ67;H7BZ50	MZT2B;MZT2A	6	2	16.4	5	0.0043668	2.8181	2743800	2997900	3282000	3129800	2962400	2574300	7767300	MZT2B	2320	2743800	2997900	3282000	3129800	2962400	2574300	FALSE	FALSE	FALSE	FALSE	FALSE	FALSE	3023180	2574300	1.174369732	80097	MZT2B;MZT2A
B8ZZQ6;V9HVW6;Q15202;Q8TBK9;Q86YS2;Q53S24;Q15204;P06454-2;P06454;Q15200;B8ZZA1;B8ZZW7;H7C2N1;A0A087WUT1;Q7Z4R6	PTMA;PTMAP7	21	7	37.4	56	0	203.89	673290000	695240000	217530000	189280000	215120000	173630000	2559300000	PTMA	5	673290000	695240000	217530000	189280000	215120000	173630000	FALSE	FALSE	FALSE	FALSE	FALSE	FALSE	398092000	173630000	2.292760468	5757	PTMA;PTMAP7
B9A6J2;Q15042;Q15042-3;Q15042-4;D3DP75	RAB3GAP1	5	8	9.1	12	0	15.121	9020900	5697300	0	6193700	6918500	9400500	2607000	RAB3GAP1	3181	9020900	5697300	1684354.072	6193700	6918500	9400500	FALSE	FALSE	TRUE	FALSE	FALSE	FALSE	5902950.814	9400500	0.62794009	22930	RAB3GAP1
J3KSW8;B9EGI2;Q6WCQ1-3;Q6WCQ1;Q6WCQ1-2;U6FSN9;H0Y2S9;H0Y7E2;Q9Y6X7;H7C3G6	MPRIP;Mprip-Ntrk1 fusion gene;KIAA0864	17	9	14.6	12	0	28.939	3498400	5083200	4112200	0	0	12187000	1885500	MPRIP	3399	3498400	5083200	4112200	1581470.563	2316361.014	12187000	FALSE	FALSE	FALSE	TRUE	TRUE	FALSE	3318326.316	12187000	0.272284099	23164	MPRIP;KIAA0864;Mprip-Ntrk1 fusion gene
C0LQF2;B3KQS9;A0A024R7F4;O00115-2;O00115	DNASE2	6	5	18.9	22	0	11.862	14841000	10048000	15283000	15359000	17288000	14374000	13009000	DNASE2	1911	14841000	10048000	15283000	15359000	17288000	14374000	FALSE	FALSE	FALSE	FALSE	FALSE	FALSE	14563800	14374000	1.013204397	1777	DNASE2
Q0IJ51;C6KE32;Q99572;Q99572-4;Q99572-8;Q99572-6	P2RX7	18	5	13.5	8	0	8.3781	0	7424400	6213000	5660200	0	0	1356800	P2RX7	3631	1464268.294	7424400	6213000	5660200	2574473.14	1431244.723	TRUE	FALSE	FALSE	FALSE	TRUE	TRUE	4667268.287	1431244.723	3.260985499	5027	P2RX7
C7DUW4;Q6FI23;Q6FHG1;P46734-2;P46734;P46734-3;Q53EZ9;E9PRZ0;J3QR49	MAP2K3	20	8	28.6	21	0	23.004	6643400	17862000	37744000	29268000	25326000	5430200	11770000	MAP2K3	1980	6643400	17862000	37744000	29268000	25326000	5430200	FALSE	FALSE	FALSE	FALSE	FALSE	FALSE	23368680	5430200	4.303465802	5606	MAP2K3
C9IZG4;O60888-3;O60888;O60888-2;C9IZQ5	CUTA	5	2	23.7	13	0	21.755	29100000	12878000	12753000	15699000	16107000	29611000	71936000	CUTA	751	29100000	12878000	12753000	15699000	16107000	29611000	FALSE	FALSE	FALSE	FALSE	FALSE	FALSE	17307400	29611000	0.58449225	51596	CUTA
C9J050;C9JEJ2;P49585;D3DXB2;B4E322;H7C1T3;B2R8P1;C9J2E1	PCYT1A;hCG_2002711	17	7	31.4	19	0	21.238	9214800	9250500	15887000	15996000	28110000	20346000	10997000	PCYT1A	2038	9214800	9250500	15887000	15996000	28110000	20346000	FALSE	FALSE	FALSE	FALSE	FALSE	FALSE	15691660	20346000	0.771240539	5130	PCYT1A
C9J0K6;P30626-3;P30626-2;P30626;B4DHQ6	SRI	5	10	70.3	47	0	39.829	68847000	78634000	79871000	85114000	102840000	39665000	102430000	SRI	555	68847000	78634000	79871000	85114000	102840000	39665000	FALSE	FALSE	FALSE	FALSE	FALSE	FALSE	83061200	39665000	2.094067818	6717	SRI
C9J384;D3DN44;Q9BQ75-2;Q9BQ75;B3KW72	CMSS1;hCG_2023567	6	3	14.2	8	0	7.2502	4577900	0	4412600	5485100	5935900	18917000	9603800	CMSS1	2153	4577900	2252019.185	4412600	5485100	5935900	18917000	FALSE	TRUE	FALSE	FALSE	FALSE	FALSE	4532703.837	18917000	0.239610078	84319	CMSS1
C9J4Z3;P61513;M0R0A1;Q6P4E4;E9PEL3;M0R2L6;G5E9R3	RPL37A	8	5	69.1	49	0	38.956	88637000	103240000	176600000	139930000	153010000	106770000	527870000	RPL37A	135	88637000	103240000	176600000	139930000	153010000	106770000	FALSE	FALSE	FALSE	FALSE	FALSE	FALSE	132283400	106770000	1.238956636	6168	RPL37A
C9J8T6;Q14061;H7C4E5	COX17	3	2	29.6	17	0	28.75	46595000	49318000	0	0	0	10015000	97598000	COX17	576	46595000	49318000	1449701.177	5395194.476	1756394.051	10015000	FALSE	FALSE	TRUE	TRUE	TRUE	FALSE	20902857.94	10015000	2.087155062	10063	COX17
E9PNC7;C9JCC6;Q14919;Q14919-2;E9PQX9	DRAP1	5	3	20.5	7	0	9.3487	7478900	7109700	0	8066900	6715900	9249500	23146000	DRAP1	1495	7478900	7109700	1930215.585	8066900	6715900	9249500	FALSE	FALSE	TRUE	FALSE	FALSE	FALSE	6260323.117	9249500	0.676828274	10589	DRAP1
C9JF17;P05090;B4DGC3;C9JX71	APOD	4	2	8.4	3	0.0070788	2.5248	0	2549200	9009700	4389300	0	0	2322500	APOD	3271	1281112.38	2549200	9009700	4389300	2209042.399	1815614.626	TRUE	FALSE	FALSE	FALSE	TRUE	TRUE	3887670.956	1815614.626	2.141242365	347	APOD
C9JFE4;Q13098-5;Q13098;Q13098-7;B4DND6;A0A096LP07;A0A096LPJ3;A8K070;Q13098-6	GPS1	20	13	34.4	34	0	28.717	27442000	25918000	33497000	38507000	30172000	36414000	32236000	GPS1	1265	27442000	25918000	33497000	38507000	30172000	36414000	FALSE	FALSE	FALSE	FALSE	FALSE	FALSE	31107200	36414000	0.854264843	2873	GPS1
C9JFR7;G4XXL9;P99999	CYCS	5	7	58.4	68	0	127.27	46182000	129070000	292050000	243610000	256490000	528820000	697130000	CYCS	91	46182000	129070000	292050000	243610000	256490000	528820000	FALSE	FALSE	FALSE	FALSE	FALSE	FALSE	193480400	528820000	0.365871941	54205	CYCS
C9JG87;Q9NYK5;Q9NYK5-2	MRPL39	3	3	9.8	8	0	4.9782	7148200	5088900	0	0	0	24191000	6595600	MRPL39	2453	7148200	5088900	2857027.456	1635455.344	3858288.396	24191000	FALSE	FALSE	TRUE	TRUE	TRUE	FALSE	4117574.239	24191000	0.170210997	54148	MRPL39
C9JJ19;P82930;A4UCR9;A0A087WUZ8	MRPS34	4	5	28.4	14	0	17.451	12630000	9587300	12098000	10523000	12066000	11879000	14861000	MRPS34	1825	12630000	9587300	12098000	10523000	12066000	11879000	FALSE	FALSE	FALSE	FALSE	FALSE	FALSE	11380860	11879000	0.958065494	65993	MRPS34
C9JLU1;P52434;P52434-3;P52434-4;P52434-2	POLR2H	6	6	49.7	22	0	38.315	35903000	24603000	29099000	31929000	37851000	28283000	52825000	POLR2H	927	35903000	24603000	29099000	31929000	37851000	28283000	FALSE	FALSE	FALSE	FALSE	FALSE	FALSE	31877000	28283000	1.1270728	5437	POLR2H
C9JXB8;C9JNW5;V9HW01;P83731	RPL24;HEL-S-310	4	7	52.9	50	0	38.825	228310000	195340000	238130000	291420000	297900000	197790000	509220000	RPL24	136	228310000	195340000	238130000	291420000	297900000	197790000	FALSE	FALSE	FALSE	FALSE	FALSE	FALSE	250220000	197790000	1.265079124	6152	RPL24
C9JQ41;H7C525;Q4VC31	CCDC58	3	3	31.5	15	0	8.1899	15101000	14539000	21664000	21422000	17421000	22344000	42003000	CCDC58	1096	15101000	14539000	21664000	21422000	17421000	22344000	FALSE	FALSE	FALSE	FALSE	FALSE	FALSE	18029400	22344000	0.806901182	131076	CCDC58
C9JQD4;Q6FH36;O43447;Q6FH57;H0YEL5;O43447-2	PPIH	7	5	34.7	14	0	12.179	15081000	18204000	15590000	18567000	16154000	12774000	33123000	PPIH	1243	15081000	18204000	15590000	18567000	16154000	12774000	FALSE	FALSE	FALSE	FALSE	FALSE	FALSE	16719200	12774000	1.308846094	10465	PPIH
C9JRJ5;Q9UGP4	LIMD1	2	5	11.5	10	0	20.153	0	0	0	54195000	21110000	18742000	6566700	LIMD1	2456	4083131.806	3142282.68	1412627.512	54195000	21110000	18742000	TRUE	TRUE	TRUE	FALSE	FALSE	FALSE	16788608.4	18742000	0.895774645	8994	LIMD1
C9JYQ9;H0Y8C2;Q6P5R6	RPL22L1	3	3	25.6	14	0	28.538	91070000	11453000	8136400	8208200	18049000	25142000	198270000	RPL22L1	307	91070000	11453000	8136400	8208200	18049000	25142000	FALSE	FALSE	FALSE	FALSE	FALSE	FALSE	27383320	25142000	1.089146448	200916	RPL22L1
C9JZR2;O60716-5;O60716-3;O60716-2;O60716;Q68DU0;O60716-8;O60716-7;O60716-6;O60716-4;Q96FS1;O60716-21;O60716-19;O60716-18;O60716-17;O60716-13;O60716-11;O60716-10;O60716-9;O60716-24;O60716-23;O60716-22;O60716-20;O60716-16;O60716-15;O60716-14;O60716-12;Q7KZJ3;A0A024R4Z0;O60716-29;O60716-27;O60716-26;O60716-25;A0A024R4Y7;O60716-32;O60716-31;O60716-30;O60716-28	CTNND1;DKFZp781O2021	41	23	31.1	102	0	239.36	98154000	62345000	53943000	69351000	51037000	72813000	28125000	CTNND1	1359.5	98154000	62345000	53943000	69351000	51037000	72813000	FALSE	FALSE	FALSE	FALSE	FALSE	FALSE	66966000	72813000	0.919698406	1500	CTNND1
D0PNI1;P63104;E7EX29;B0AZS6;P63104-2;B7Z2E6;H0YB80	YWHAZ	14	14	73.1	140	0	323.31	1810800000	2131600000	1444100000	1395900000	1725200000	2312300000	2361400000	YWHAZ	9	1810800000	2131600000	1444100000	1395900000	1725200000	2312300000	FALSE	FALSE	FALSE	FALSE	FALSE	FALSE	1701520000	2312300000	0.735856074	7534	YWHAZ
Q8N4P8;D2CFK9;Q9BZE4;Q53GS0;Q9BZE4-2;B4DHR2;Q9BZE4-3;O60747	GTPBP4	9	17	31.8	49	0	83.377	49048000	48811000	74388000	78795000	55690000	38585000	26505000	GTPBP4	1412	49048000	48811000	74388000	78795000	55690000	38585000	FALSE	FALSE	FALSE	FALSE	FALSE	FALSE	61346400	38585000	1.589902812	23560	GTPBP4
D3DNA1;L7RT22;P18084;V9GZ57;H7C5U2;H7C4W1	ITGB5	7	4	7.8	6	0	8.6598	4168700	0	0	0	2719200	4980500	1761900	ITGB5	3459	4168700	2862718.365	4372970.579	2141152.65	2719200	4980500	FALSE	TRUE	TRUE	TRUE	FALSE	FALSE	3252948.319	4980500	0.653136898	3693	ITGB5
D3DP46;P61009	SPCS3	2	3	17.8	22	0	18.47	27943000	26409000	18906000	21863000	26905000	22949000	55189000	SPCS3	901	27943000	26409000	18906000	21863000	26905000	22949000	FALSE	FALSE	FALSE	FALSE	FALSE	FALSE	24405200	22949000	1.063453745	60559	SPCS3
Q6NX58;D3DPS3;Q3KQU3-2;Q3KQU3-4;Q3KQU3;A1L1B7;Q3KQU3-3	MAP7D1;RPRC1	8	3	5.9	9	0	32.169	4246700	5120200	5514800	6565500	6986700	12090000	3382700	MAP7D1	2999	4246700	5120200	5514800	6565500	6986700	12090000	FALSE	FALSE	FALSE	FALSE	FALSE	FALSE	5686780	12090000	0.470370554	55700	MAP7D1;RPRC1
D3DQH8;P09486;B4DRV4;B2RDL6;F5GY03;E5RK62	SPARC	7	10	34	45	0	57.603	27152000	100930000	24471000	24806000	59031000	89371000	65559000	SPARC	801	27152000	100930000	24471000	24806000	59031000	89371000	FALSE	FALSE	FALSE	FALSE	FALSE	FALSE	47278000	89371000	0.529008291	6678	SPARC
D3DSY9;P49354;P49354-2;B3KVN2;E9PQP6;H0YCW1	FNTA	8	8	20.8	28	0	62.527	17471000	15799000	16050000	11448000	9513600	12398000	10848000	FNTA	2054	17471000	15799000	16050000	11448000	9513600	12398000	FALSE	FALSE	FALSE	FALSE	FALSE	FALSE	14056320	12398000	1.133757058	2339	FNTA
D3DTD2;O75962-5;O75962-2;O75962;E7EWP2;E7EPJ7;O75962-4;F5H228;B4E3M5	TRIO	11	4	1.8	4	0	7.6613	0	2250400	0	0	1651600	5241900	318140	TRIO	4142	3941113.127	2250400	1335942.656	1868626.949	1651600	5241900	TRUE	FALSE	TRUE	TRUE	FALSE	FALSE	2209536.546	5241900	0.421514441	7204	TRIO
H3BV80;H3BMM9;H3BTC0;D3DU92;Q15287;Q15287-3;Q15287-2;H3BMS0;A0A024R9P1;H3BPG5	RNPS1;hCG_2026745	19	6	26.1	20	0	29.775	13336000	14523000	16851000	20385000	23308000	16689000	25328000	RNPS1	1439	13336000	14523000	16851000	20385000	23308000	16689000	FALSE	FALSE	FALSE	FALSE	FALSE	FALSE	17680600	16689000	1.059416382	10921	RNPS1
D3DUJ0;Q8TA92;Q9Y4W6	AFG3L2	8	19	25	44	0	67.14	83126000	46426000	39319000	45558000	35131000	21201000	22267000	AFG3L2	1518.5	83126000	46426000	39319000	45558000	35131000	21201000	FALSE	FALSE	FALSE	FALSE	FALSE	FALSE	49912000	21201000	2.354228574	10939	AFG3L2
D3DVA5;V9GYM8;Q92974-3;Q92974-2;Q92974	ARHGEF2	26	30	34.7	88	0	120.34	160960000	76220000	58043000	48714000	69163000	37254000	25995000	ARHGEF2	1422	160960000	76220000	58043000	48714000	69163000	37254000	FALSE	FALSE	FALSE	FALSE	FALSE	FALSE	82620000	37254000	2.21774843	9181	ARHGEF2
D3DVC4;P48681	NES	6	58	40.5	186	0	323.31	1794500	3094700	404490000	134920000	693180000	59741000	56132000	NES	894	1794500	3094700	404490000	134920000	693180000	59741000	FALSE	FALSE	FALSE	FALSE	FALSE	FALSE	247495840	59741000	4.142813813	10763	NES
D3DWK4;B4DGI7;A0A0A0MQS1;Q53H96-2;Q53H96;B5MD87;B4DI71	PYCRL	7	5	28	14	0	12.354	11035000	5223800	13731000	13982000	10559000	10079000	12735000	PYCRL	1928	11035000	5223800	13731000	13982000	10559000	10079000	FALSE	FALSE	FALSE	FALSE	FALSE	FALSE	10906160	10079000	1.082067665	65263	PYCR3;PYCRL
D3DWL9;Q10570	CPSF1	6	3	2.9	9	0	7.3237	3456500	3035300	3660200	3476400	4189300	3563300	891610	CPSF1	3836	3456500	3035300	3660200	3476400	4189300	3563300	FALSE	FALSE	FALSE	FALSE	FALSE	FALSE	3563540	3563300	1.000067353	29894	CPSF1
E9PF84;G5E9Q7;D3DWV9;E7EQB8;P51553-2;P51553;H7C1W2;O15384	IDH3G;hCG_2004980	11	5	20.7	14	0	11.821	5014400	7527900	14715000	8967300	8908200	4906800	12522000	IDH3G	1942	5014400	7527900	14715000	8967300	8908200	4906800	FALSE	FALSE	FALSE	FALSE	FALSE	FALSE	9026560	4906800	1.839602185	3421	IDH3G
D3DWY7;P61758;Q6FH24;B4DWR3	VBP1	4	8	39.9	23	0	118.67	21260000	50232000	36120000	47867000	42341000	32440000	40018000	VBP1	1125	21260000	50232000	36120000	47867000	42341000	32440000	FALSE	FALSE	FALSE	FALSE	FALSE	FALSE	39564000	32440000	1.219605425	7411	VBP1
D3DX70;Q8IWJ2	GCC2	2	2	1.5	2	0.0029528	2.9703	1415100	1992700	0	2209100	0	0	209430	GCC2	4205	1415100	1992700	2242377.747	2209100	2390567.444	2580799.821	FALSE	FALSE	TRUE	FALSE	TRUE	TRUE	2049969.038	2580799.821	0.794315398	9648	GCC2
D3DXC9;Q53ET7;P34896-2;P34896;P34896-3;P34896-4;B4DZB5	SHMT1	11	10	33.6	45	0	60.352	25037000	41723000	38870000	28670000	14603000	23672000	18709000	SHMT1	1659	25037000	41723000	38870000	28670000	14603000	23672000	FALSE	FALSE	FALSE	FALSE	FALSE	FALSE	29780600	23672000	1.258051707	6470	SHMT1
Q17RE6;D3YTF8;Q59ET7;Q9NNW7-2;Q9NNW7;A0A096LNN4;A0A096LPK7;Q9NNW7-3;B3KUQ5;Q6M1B7;A0A096LPD9;E7EWK1;A4FTY4;A0A0U1RQX0;Q9NNW7-4	TXNRD2;DKFZp781E0833	18	5	14.6	7	0	12.062	5498700	8111700	0	2437300	3468700	2905900	5163200	TXNRD2	2678	5498700	8111700	6416519.901	2437300	3468700	2905900	FALSE	FALSE	TRUE	FALSE	FALSE	FALSE	5186583.98	2905900	1.784845996	10587	TXNRD2;DKFZp781E0833
D6R9P4;P46926;D6RAY7;A8K3S1;D6RFF8;B3KMV2;P46926-2;D6RB13	GNPDA1	12	7	65.3	34	0	80.96	45695000	49801000	40252000	70030000	50008000	37953000	53733000	GNPDA1	917	45695000	49801000	40252000	70030000	50008000	37953000	FALSE	FALSE	FALSE	FALSE	FALSE	FALSE	51157200	37953000	1.347909256	10007	GNPDA1
D6R9Z7;Q71U45;P15954	COX7C	3	2	32.1	10	0	4.3263	0	13753000	15299000	0	0	7279300	36278000	COX7C	1185	2316326.128	13753000	15299000	1622936.105	2580315.123	7279300	TRUE	FALSE	FALSE	TRUE	TRUE	FALSE	7114315.471	7279300	0.977335111	1350	COX7C
D6RIZ4;D6RA47;D6RE79;Q14728	MFSD10	5	3	8.7	8	0	11.533	4605000	4821100	3146400	3245500	0	4333900	4905900	MFSD10	2719	4605000	4821100	3146400	3245500	5725439.607	4333900	FALSE	FALSE	FALSE	FALSE	TRUE	FALSE	4308687.921	4333900	0.994182589	10227	MFSD10
D6RBJ9;P32321;P32321-2;B4DDC2	DCTD	9	3	21.9	4	0	11.259	7085900	0	9432500	7567500	6743900	10862000	9927200	DCTD	2123	7085900	1455413.094	9432500	7567500	6743900	10862000	FALSE	TRUE	FALSE	FALSE	FALSE	FALSE	6457042.619	10862000	0.594461666	1635	DCTD
Q32Q75;X5D7E3;D6RBW1;P06730;P06730-3;P06730-2;B7Z2T1;H0Y8J7	EIF4E	11	7	30	39	0	20.578	53482000	25121000	44479000	36907000	48685000	49528000	61437000	EIF4E	835	53482000	25121000	44479000	36907000	48685000	49528000	FALSE	FALSE	FALSE	FALSE	FALSE	FALSE	41734800	49528000	0.842650622	1977	EIF4E
D6RCD0;Q8NBQ5	HSD17B11	2	10	43.8	40	0	89.602	52822000	25772000	48383000	51331000	40391000	13139000	42153000	HSD17B11	1091	52822000	25772000	48383000	51331000	40391000	13139000	FALSE	FALSE	FALSE	FALSE	FALSE	FALSE	43739800	13139000	3.329005252	51170	HSD17B11
D6RGI3;D6RER5;Q9NVA2;Q9NVA2-2;D6RDU5	11-Sep	10	8	45.6	45	0	171.85	70417000	78239000	42382000	28775000	33865000	78101000	61637000	11-Sep	832	70417000	78239000	42382000	28775000	33865000	78101000	FALSE	FALSE	FALSE	FALSE	FALSE	FALSE	50735600	78101000	0.649615242	55752	11-Sep
F5CTF3;D6RFG8;P27707;B4E0A5;D6RCP9	DCK	6	6	26.5	9	0	12.048	5992200	7026500	5326900	0	0	8140400	8702200	DCK	2226.5	5992200	7026500	5326900	3128147.812	1781837.114	8140400	FALSE	FALSE	FALSE	TRUE	TRUE	FALSE	4651116.985	8140400	0.571362216	1633	DCK
D6RGE2;Q9Y3B5;Q96CN7	ISOC1	3	2	13.3	7	0	4.3091	0	0	5279300	4258400	3843500	0	4510000	ISOC1	2779	1217093.784	1560606.782	5279300	4258400	3843500	3139996.619	TRUE	TRUE	FALSE	FALSE	FALSE	TRUE	3231780.113	3139996.619	1.029230444	51015	ISOC1
D6RGX2;Q9NUQ7;H0YA18;B3KRI4;H0Y9B0	UFSP2	7	4	18.9	5	0	7.9475	0	2839800	0	3555200	5003800	3233200	2193200	UFSP2	3298	2065488.7	2839800	3415592.596	3555200	5003800	3233200	TRUE	FALSE	TRUE	FALSE	FALSE	FALSE	3375976.259	3233200	1.044159427	55325	UFSP2
[truncated: 1,433 more rows]
